# Supplementary material for: Investigation of the Hydrogen Sulfide Signaling Pathway in Schwann Cells during Peripheral Nerve Degeneration: Multi-Omics Approaches
Source: MDPI journal article supplement (doi:10.3390/antiox11081606), 2022-08-19
Supplement: s1 [file s1]

## Supplementary Materials

### **Investigation of the Hydrogen Sulfide Signaling Pathway in Schwann Cells During Peripheral Nerve Degeneration: Multi-omics Approaches**

Yoo Lim Chun<sup>1,2,3†</sup>, Won-Joon Eom<sup>1,2†</sup>, Jun Hyung Lee<sup>4†</sup>, Thy N. C. Nguyen<sup>4</sup>, Ki-Hoon Park<sup>1,5</sup>,  
Hyung-Joo Chung<sup>5</sup>, Han Seo<sup>5</sup>, Youngbuhm Huh<sup>1,2</sup>, Sang Hoon Kim<sup>6</sup>, Seung Geun Yeo<sup>6</sup>,  
Wonseok Park<sup>7</sup>, Geul Bang<sup>8</sup>, Jin Young Kim<sup>8</sup>, Min-Sik Kim<sup>4\*</sup>, Na Young Jeong<sup>3\*</sup>, Junyang  
Jung<sup>1,2\*</sup>

<sup>†</sup>These authors contributed equally to this work

<sup>1</sup>Department of Anatomy and Neurobiology, College of Medicine, Kyung Hee University, Dongdaemun-gu, Seoul 02447, Korea.

<sup>2</sup>Department of Biomedical Science, Graduation School, Kyung Hee University, Dongdaemun-gu, Seoul 02447, Korea.

<sup>3</sup>Department of Anatomy and Cell Biology, College of Medicine, Dong-A University, Seo-gu, Busan 49201, Korea.

<sup>4</sup>Department of New Biology, Daegu Gyeongbuk Institute of Science and Technology (DGIST), Dalseong-gun, Daegu 42988, Korea.

<sup>5</sup>Department of Anesthesiology and Pain Medicine, College of Medicine, Kosin University, Seo-gu, Busan 49267, Korea.

<sup>6</sup>Department of Otorhinolaryngology-Head and Neck Surgery, College of Medicine, Kyung Hee University, Dongdaemun-gu, Seoul 02447, Korea.

<sup>7</sup>Department of Orthopedic Surgery, Good Samsun Hospital, Sasang-gu, Busan, 47007, Korea.

<sup>8</sup>Research Center for Bioconvergence Analysis, Korea Basic Science Institute, Ochang 28119, Republic of Korea

**\*Correspondences should be addressed to:**

**Min-Sik Kim Ph.D.** E-mail: [mkim@dgist.ac.kr](mailto:mkim@dgist.ac.kr)

**Na Young Jeong MD, Ph.D.** E-mail: [jnyjyy@dau.ac.kr](mailto:jnyjyy@dau.ac.kr)

**Junyang Jung MD, Ph.D.** E-mail: [jjung@khu.ac.kr](mailto:jjung@khu.ac.kr)

## **Contents**

**Supplementary Figure S1.** Inhibition patterns of SW10 cell proliferation in a time-dependent manner.

**Supplementary Figure S2.** Functional gene ontology (GO) at protein expression dynamic clusters 1-5 in global proteomics analysis among control, 1DIV, and NEM/1D.

**Supplementary Figure S3.** Kyoto Encyclopedia of Genes and Genomes (KEGG) and Protein Family (PFAM) using differentially expressed proteins (DEPs) between NEM/1D and 1DIV.

**Supplementary Figure S4.** Complexity between the miRNAs and oxidative stress gene network.

**Supplementary Figure S5.** Interaction between the miRNAs and transcription factor gene network.

**Supplementary Table S1.** List of primer sequences used for qPCR.

**Supplementary Table S2.** List of top 30 upregulated and downregulated genes.

**Supplementary Table S3.** List of oxidative stress and transcription factor genes.

**Supplementary Table S4.** List of top 30 upregulated and downregulated proteins.

**Supplementary Table S5.** List of top 30 upregulated and downregulated miRNAs.

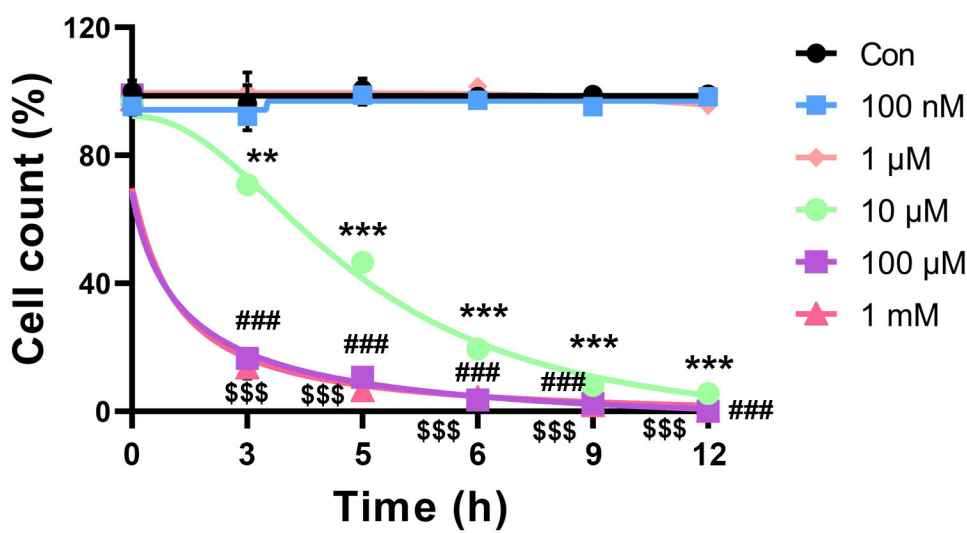

**Figure S1.** Inhibition patterns of SW10 cell proliferation in a time-dependent manner. SW10 cell were treated with *N*-ethylmaleimide (NEM) at several concentrations (100 nM, 1 μM, 10 μM, 100 μM, 1 mM) and observed in each time-course. Live cells of each group were counted and shown as line graphs. \*\*P < 0.01 and \*\*\*, ###, and \$\$\$P < 0.001.

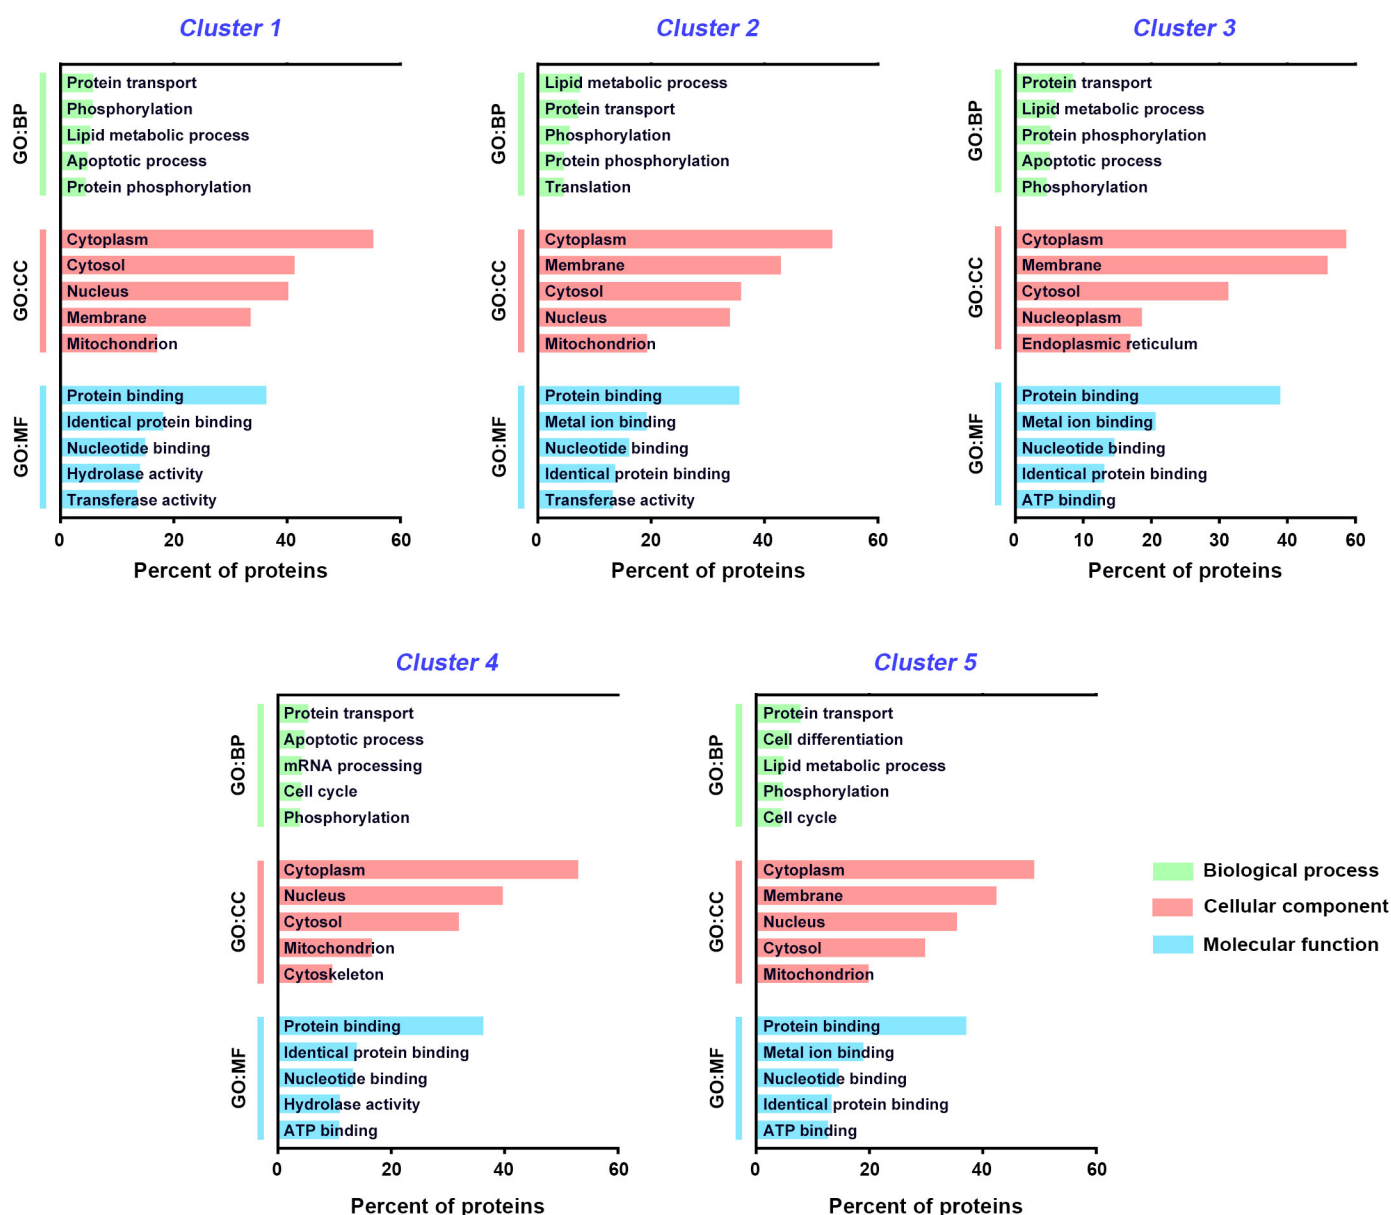

**Figure S2.** Functional gene ontology (GO) at protein expression dynamic clusters 1-5 in global proteomics analysis among control, 1DIV, and NEM/1D. The functional GO terms were shown at each cluster. BP, biological process; CC, cellular component; MF, molecular functions. 1DIV, nerves with no treatment at 1 day *in vitro*; NEM1/D, nerves with NEM treatment at 1DIV.



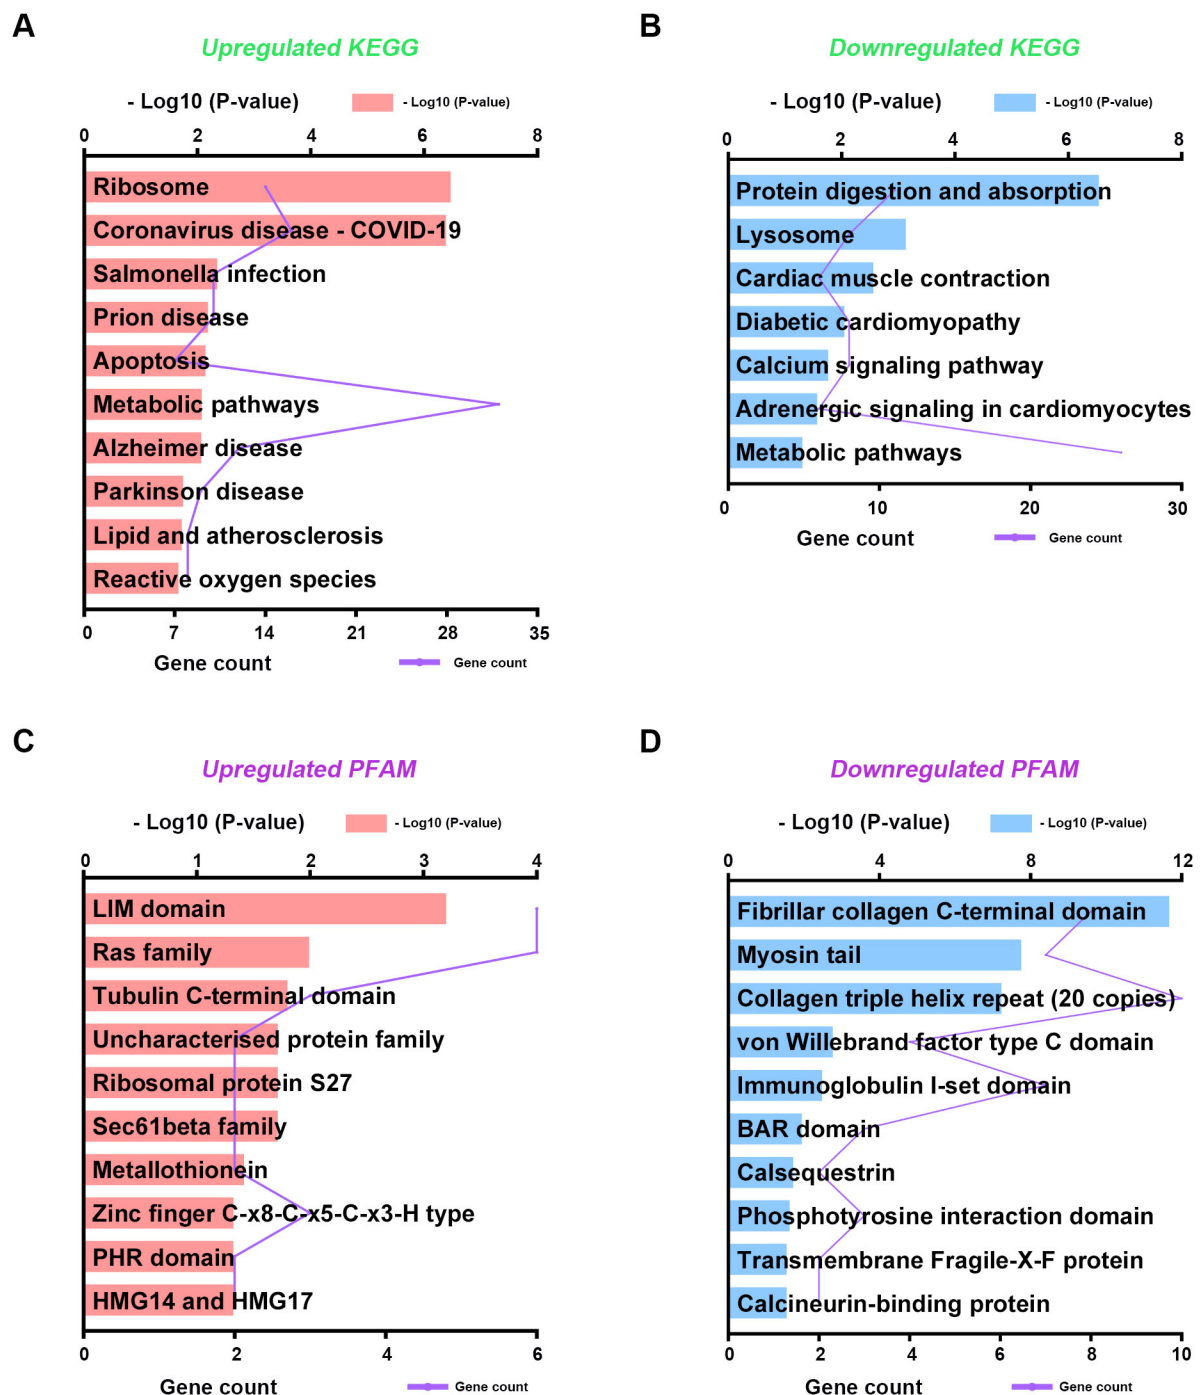

**Figure S3.** Kyoto Encyclopedia of Genes and Genomes (KEGG) and Protein Family (PFAM) using differentially expressed proteins (DEPs) between NEM/1D and 1DIV. KEGG pathways upregulated and downregulated in response to NEM treatment were shown in (A) and (B), respectively. PFAM upregulated and downregulated in response to NEM treatment was shown in (C) and (D), respectively.

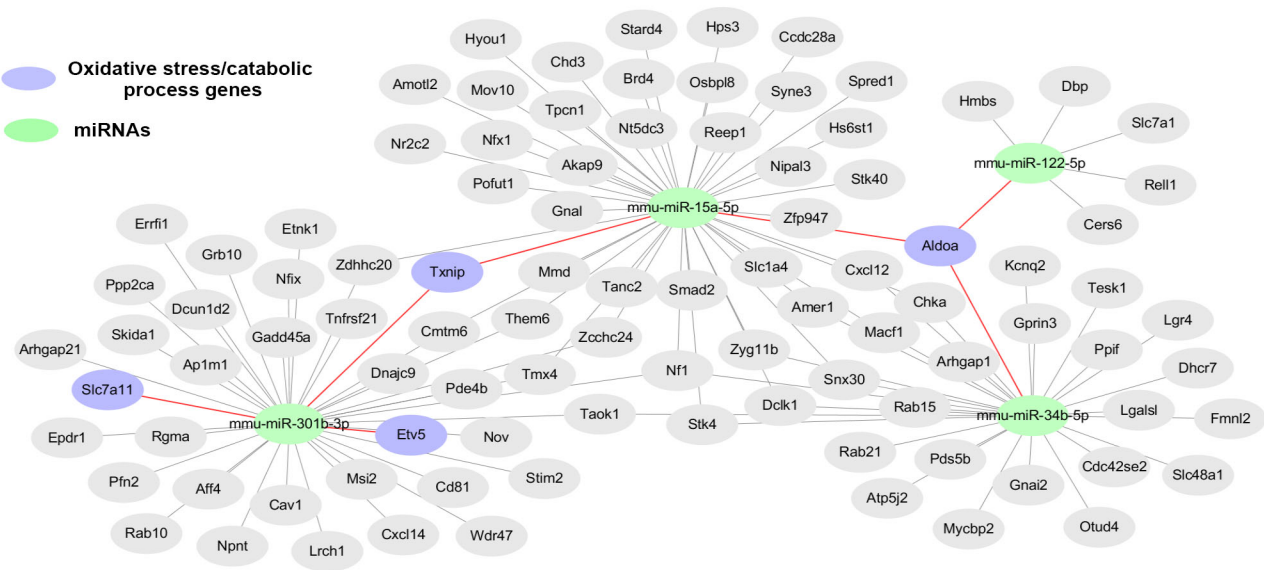

**Figure S4.** Complexity between the miRNAs and oxidative stress gene network. Green and purple dots represented miRNAs and oxidative stress genes. The red line represented commonly interconnected miRNAs and oxidative stress genes.



Table S1. List of primer sequences used for qPCR

| Primer Name     | Primer sequence (5' to 3')           | Primer Name     | Primer sequence (5' to 3')        |
|-----------------|--------------------------------------|-----------------|-----------------------------------|
| Nfix            | Forward - CTTCCACCAGCAGCACCAA        | Fosl1           | Forward - GCATGTACCGAGACTACGGGG   |
|                 | Reverse - GGGCTCCCTGCATCCAC          |                 | Reverse - TGCACCATCCAGTGCAGTTCTT  |
| Prrx1           | Forward - AAGAACTTCTCCGTCAGTCACCT    | Slc7a11         | Forward - ATACTCCAGAACACGGGCAG    |
|                 | Reverse - CCTGTTTCTCCGCTGCTTTCT      |                 | Reverse - AGTTCCACCCAGACTCGAAC    |
| Rela            | Forward - CGGGATGGCTACTATGAGG        | Herpub1         | Forward - AGAACATCTCTAGGCCTGAG    |
|                 | Reverse - CTCCAGGTCTCGCTTCTT         |                 | Reverse - TGCCTTGCATAGATCTGCTG    |
| Smad2           | Forward - GTAAGATCCCACCAGGCTGTAA     | Ddit3           | Forward - ACAGAGCCAGAATAACAGCCG   |
|                 | Reverse - CTCCCCAGCCCTTCACAAAA       |                 | Reverse - TCTGCTTTCAGGTGTGGTGGTG  |
| Hivep2          | Forward - CCCCACGTTTTACAGCAAGAGC     | Srxn1           | Forward - GACGTCTCTGGATCAAAG      |
|                 | Reverse - TCTGAAAGTCCACCCGCTTCTC     |                 | Reverse - GCAGGAATGGTCTCTCTCTG    |
| Nfxl1           | Forward - AGAACCTCCTCAGTTGCTGC       | Col3a1          | Forward - TGCTCCTGTGCTTCCTG       |
|                 | Reverse - AAGGGGCATTACACAGGATG       |                 | Reverse - GACCTGGTTGTCTCTGGA      |
| Blzf1           | Forward - CAGGCAGAAAGTGGTCACAGA      | Tns1            | Forward - CTGCCCCCTTGC GTTCTT     |
|                 | Reverse - AGTGATACTGCGGGTCATCC       |                 | Reverse - ACTTCCAACCCGGCAGTCT     |
| Hspd1           | Forward - CACAGTCCTTCGCCAGATGAG      | Fos             | Forward - TTCCACCCCAGAGTCTGAGGA   |
|                 | Reverse - CTACACCTTGAAGCATTAAAGGCT   |                 | Reverse - GCTCCACGTTGCTGATGCTC    |
| Stx4            | Forward - CCTGCAGAACCTGCGAGAGGAGAT   | Wisp2           | Forward - GTACCTGGATGGGGAGACCT    |
|                 | Reverse - CCTCCGGATCCGCTCCACATT      |                 | Reverse - CACCTTCTGGCACCTGTAT     |
| Sod1            | Forward - GCAGGGAACCATCCACTTCG       | Tnbs1           | Forward - TGATGACTACGCTGGCTTTG    |
|                 | Reverse - CCTGCACTGGTACAGCCTTG       |                 | Reverse - TGAGTATCCCTGAGCCCTTG    |
| Trpa1           | Forward - CAGGATGCTACGGTTTTTTCATTACT | Rgcc            | Forward - GGCTTCAGCGACTCGGAG      |
|                 | Reverse - GCATGTGTCAATGTTTGGTACTTCT  |                 | Reverse - CTTTCCGAGGAGTGACAGCG    |
| Ldha            | Forward - GGCACTGACGCAGACAAG         | Slc40a1         | Forward - GCTGCTAGAATCGGTCTTTGGT  |
|                 | Reverse - TGATCACCTCGTAGGCACTG       |                 | Reverse - CAGCAACTGTGTACCCGTCAA   |
| Gnao1           | Forward - TACTACCTGGACAGCCTGGA       | Gapdh           | Forward - CGTCCCGTAGACAAAATGGT    |
|                 | Reverse - GGATCCACTTCTTGCGTTCA       |                 | Reverse - TTGATGGCAACAATCTCCAC    |
| Mgst1           | Forward - TTTTGCCAACCCAGAAGACT       | Cenpd           | Forward - CGCGTTCATGCACCGCCTGC    |
|                 | Reverse - GAGGCCGATGCCGAGAAAGG       |                 | Reverse - CCAGGCAGTCGGGCTCGTAGTAG |
| Mapk8           | Forward - GCCACAAAATCCTCTTTCCA       | Atf3            | Forward - AAGGGGTGATGCAACGCGCT    |
|                 | Reverse - CACATCGGGGAACAGTTTCT       |                 | Reverse - CGCGGGTTAGCCGATTGGCT    |
| Hmox1           | Forward - CTCATCCCAGACACCGC          | Mxd3            | Forward - AAGATTTGGTGGTGCCTGAA    |
|                 | Reverse - CAGGCAAGATTCTCCCTTACAGA    |                 | Reverse - CCTTTGTGGCTTTGTGGTTGT   |
| Trib3           | Forward - GGCCTTATATCCTTTTGAACGA     | Zeb1            | Forward - ACCCCTTCAAGAACCGCTTT    |
|                 | Reverse - CGCTGGCAGGGTACACCTT        |                 | Reverse - CAATTGGCCACCACTGCTAA    |
| Stc2            | Forward - AGGAGAACGTGCGTGTGATT       | Cenpt           | Forward - GAACATGGCGGACCTCAG      |
|                 | Reverse - CTGTTACACTGAGCCTGGA        |                 | Reverse - AGTGCTCCGGCGTCTCAT      |
| Slco4a1         | Forward - TTA CTGCCTGTCCTGGAAGC      | Txnip           | Forward - AGTGATTGGCAGCAGGTC      |
|                 | Reverse - TCAGTGCAGTTTGCTTGGAC       |                 | Reverse - GGTATCTGGGATGTTTAGG     |
| Cxcl12          | Forward - ATCCTCAACACTCCAACTGTGCC    | Myc             | Forward - TTGGAACCCCGCAGACAG      |
|                 | Reverse - TTCAGACCTAGGCTCCTCTGTAA    |                 | Reverse - GCTGTACGGAGTCGTAGTCG    |
| Cxcl1           | Forward - AGACCATGGCTGGGATTAC        | Bmp4            | Forward - TGAGTACCCGGAGCGTCC      |
|                 | Reverse - AGCTTCAGGGTCAAGGCAAG       |                 | Reverse - CTCCAGATGTTCTTCGTGATGG  |
| Apod            | Forward - GAAGCCAAACAGAGCAACG        |                 |                                   |
|                 | Reverse - TGTTTCTGGAGGGAGATAAGGA     |                 |                                   |
| mmu-miR-U6      | TGGCCCTGCGCAAGGATG                   | mmu-miR-129-5p  | CTTTTTGCGGTCTGGGCTTGC             |
| mmu-miR-6948-3p | TGTCCTTCCTGTCTGACCACA                | mmu-miR-301b-3p | CAGTGCAATGGTATTGTCAAAGC           |
| mmu-miR-335-3p  | TTTTTCATTATTGCTCCTGACC               | mmu-miR-15a-5p  | TAGCAGCACATAATGGTTTGTG            |
| mmu-miR-200a-3p | TAACACTGTCTGGTAACGATGT               | mmu-miR-34b-5p  | AGGCAGTGTAATTAGCTGATTGT           |
| mmu-miR-489-5p  | TGTCATATGTGTGATGACACTTTCT            | mmu-miR-709     | GGAGGCAGAGGCAGGAGGA               |
| mmu-miR-1187    | TATGTGTGTGTGTATGTGTGTAA              | mmu-miR-455-3p  | GCAGTCCACGGGCATATACAC             |
| mmu-miR-467e-5p | ATAAGTGTGAGCATGTATATGT               | mmu-miR-133a-3p | TTTGGTCCCCTTCAACCAGCTG            |
| mmu-miR-122-5p  | TGGAGTGTGACAATGGTGTTTG               | mmu-miR-200b-3p | TAATACTGCCTGGTAATGATGA            |
| mmu-miR-7224-3p | TCCACTGAGAGGACCACCCAC                | mmu-miR-200c-3p | TAATACTGCCGGGTAATGATGGA           |

**Table S2. List of top 30 upregulated and downregulated genes**

| Entrez ID | Gene Symbol | Log <sub>2</sub> FC | up/down | Entrez ID | Gene Symbol   | Log <sub>2</sub> FC | up/down |
|-----------|-------------|---------------------|---------|-----------|---------------|---------------------|---------|
| 15368     | Hmox1       | 2.64                | up      | 100037283 | Rnaset2a      | -2.42               | down    |
| 228775    | Trib3       | 2.57                | up      | 69994     | Rsc1a1        | -2.06               | down    |
| 26570     | Slc7a11     | 2.55                | up      | 14825     | Cxcl1         | -1.91               | down    |
| 14283     | Fosl1       | 2.30                | up      | 319159    | Hist1h4j      | -1.90               | down    |
| 504193    | Npcd        | 2.29                | up      | 53945     | Slc40a1       | -1.70               | down    |
| 76650     | Srxn1       | 2.29                | up      | 66214     | Rgcc          | -1.70               | down    |
| 11987     | Slc7a1      | 2.22                | up      | 319160    | Hist1h4k      | -1.70               | down    |
| 12869     | Cox8b       | 2.22                | up      | 21961     | Tns1          | -1.70               | down    |
| 20856     | Stc2        | 2.22                | up      | 14281     | Fos           | -1.70               | down    |
| 64209     | Herpud1     | 2.22                | up      | 20315     | Cxcl12        | -1.56               | down    |
| 100503710 | Gm5741      | 2.01                | up      | 97122     | Hist2h4       | -1.45               | down    |
| 13198     | Ddit3       | 1.87                | up      | 21825     | Thbs1         | -1.45               | down    |
| 108115    | Slco4a1     | 1.87                | up      | 22403     | Wisp2         | -1.45               | down    |
| 394435    | Ugt1a6b     | 1.87                | up      | 171543    | Bmf           | -1.45               | down    |
| 319520    | Dusp4       | 1.87                | up      | 319157    | Hist1h4f      | -1.45               | down    |
| 69065     | Chac1       | 1.87                | up      | 12825     | Col3a1        | -1.45               | down    |
| 381990    | Zbtb2       | 1.87                | up      | 75555     | 1700020D05Rik | -1.45               | down    |
| 17869     | Myc         | 1.87                | up      | 241525    | Ypel4         | -1.45               | down    |
| 22782     | Slc30a1     | 1.87                | up      | 319182    | Hist1h2bh     | -1.45               | down    |
| 17768     | Mthfd2      | 1.82                | up      | 14282     | Fosb          | -1.45               | down    |
| 18793     | Plaur       | 1.82                | up      | 208990    | Npb           | -1.45               | down    |
| 71839     | Osgin1      | 1.82                | up      | 326620    | Hist1h4b      | -1.45               | down    |
| 17313     | Mgp         | 1.82                | up      | 218203    | Myip          | -1.45               | down    |
| 68223     | Fam24a      | 1.82                | up      | 76933     | Ifi2712a      | -1.45               | down    |
| 20361     | Sema7a      | 1.70                | up      | 14102     | Fas           | -1.40               | down    |
| 17386     | Mmp13       | 1.67                | up      | 13865     | Nr2f1         | -1.37               | down    |
| 215814    | Ccdc28a     | 1.67                | up      | 12159     | Bmp4          | -1.37               | down    |
| 11816     | Apoe        | 1.62                | up      | 73363     | 1700056E22Rik | -1.37               | down    |
| 16975     | Lrp8        | 1.58                | up      | 23967     | Osr1          | -1.37               | down    |
| 11717     | Ampd3       | 1.42                | up      | 21810     | Tgfb1         | -1.26               | down    |

Table S3. List of oxidative stress and transcription factor genes

| Associated Gene        | Entrez ID | Gene Symbol | Log <sub>2</sub> FC | Description                                                |
|------------------------|-----------|-------------|---------------------|------------------------------------------------------------|
| Oxidative stress genes | 15368     | Hmox1       | 3.44                | Heme oxygenase 1                                           |
|                        | 26570     | Slc7a11     | 2.01                | Solute carrier family 7 member 11                          |
|                        | 14283     | Fosl1       | 1.87                | Fos-like antigen 1                                         |
|                        | 76650     | Srxn1       | 1.41                | Sulfiredoxin 1 homolog                                     |
|                        | 20856     | Stc2        | 1.28                | Stanniocalcin 2                                            |
|                        | 20856     | Apoe        | 0.97                | Apolipoprotein E                                           |
|                        | 11816     | Etv5        | 0.90                | Ets variant 5                                              |
|                        | 14629     | Gclc        | 0.90                | Glutamate-cysteine ligase, catalytic subunit               |
|                        | 50493     | Txnrd1      | 0.88                | Thioredoxin reductase 1                                    |
|                        | 11839     | Areg        | 0.81                | Amphiregulin                                               |
|                        | 12795     | Plk3        | 0.81                | Polo like kinase 3                                         |
|                        | 11911     | Atf4        | 0.81                | Activating transcription factor 4                          |
|                        | 17250     | Abcc1       | 0.70                | ATP-binding cassette, sub-family C member 1                |
|                        | 230784    | Sesn2       | 0.68                | Sestrin 2                                                  |
|                        | 14630     | Gclm        | 0.64                | Glutamate-cysteine ligase, modifier subunit                |
|                        | 72170     | Chchd4      | 0.58                | Coiled-coil-helix-coiled-coil-helix domain containing 4    |
|                        | 223646    | Naprt       | 0.55                | Nicotinate phosphoribosyltransferase                       |
|                        | 20845     | Star        | 0.55                | Steroidogenic acute regulatory protein                     |
|                        | 382985    | Rrm2b       | 0.51                | Ribonucleotide reductase M2 B                              |
|                        | 19229     | Ptk2b       | -0.51               | PTK2 protein tyrosine kinase 2 beta                        |
|                        | 18854     | Pml         | -0.56               | Promyelocytic leukemia                                     |
|                        | 13614     | Edn1        | -0.56               | Endothelin 1                                               |
|                        | 211651    | Fancd2      | -0.57               | Fanconi anemia, complementation group D2                   |
|                        | 230738    | Zc3h12a     | -0.58               | Zinc finger CCCH type containing 12A                       |
|                        | 13605     | Ect2        | -0.62               | Ect2 oncogene                                              |
|                        | 72774     | Neil1       | -0.69               | Nei endonuclease VIII-like 1                               |
|                        | 18595     | Pdgfra      | -0.79               | Platelet derived growth factor receptor, alpha polypeptide |
|                        | 20617     | Snca        | -0.86               | Synuclein, alpha                                           |
|                        | 56338     | Txnip       | -0.97               | Thioredoxin interacting protein                            |
|                        | 12159     | Bmp4        | -1.04               | Bone morphogenetic protein 4                               |
|                        | 14281     | Fos         | -1.41               | FBJ osteosarcoma oncogene                                  |
| Transcription factors  | 14283     | Fosl1       | 1.87                | Fos-like antigen 1                                         |
|                        | 17869     | Myc         | 1.14                | Myelocytomatosis oncogene                                  |
|                        | 11910     | Atf3        | 0.88                | Activating transcription factor 3                          |
|                        | 12608     | Cebpb       | 0.78                | CCAAT/enhancer binding protein, beta                       |
|                        | 17121     | Mxd3        | -0.52               | Max dimerization protein 3                                 |
|                        | 12615     | Cenpa       | -0.52               | Centromere protein A                                       |
|                        | 12393     | Runx2       | -0.57               | Runt related transcription factor 2                        |
|                        | 320394    | Cenpt       | -0.61               | Centromere protein T                                       |
|                        | 21417     | Zeb1        | -0.63               | Zinc finger E-box binding homeobox 1                       |
|                        | 14281     | Fos         | -1.41               | FBJ osteosarcoma oncogene                                  |

Table S4. List of top 30 upregulated and downregulated proteins

| 1DIV vs Con |             |                     |         | NEM/1D vs 1DIV |             |                     |         |
|-------------|-------------|---------------------|---------|----------------|-------------|---------------------|---------|
| Accession   | Gene Symbol | Log <sub>2</sub> FC | up/down | Accession      | Gene Symbol | Log <sub>2</sub> FC | up/down |
| Q9ET80      | Jph1        | 2.52                | up      | Q9WUB3         | Pygm        | 1.09                | up      |
| Q32M07      | Ak8         | 2.05                | up      | Q7TQG1         | Plekha6     | 0.90                | up      |
| P13412      | Tnni2       | 1.61                | up      | Q9DCT8         | Crip2       | 0.89                | up      |
| Q3LR78      | Zbtb38      | 1.61                | up      | Q8BGH4         | Reep1       | 0.75                | up      |
| P61208      | Arl4c       | 1.52                | up      | Q6NZQ6         | Znf740      | 0.64                | up      |
| P13541      | Myh3        | 1.45                | up      | Q9CWF2         | Tubb2b      | 0.63                | up      |
| Q3UX10      | Tubal3      | 1.40                | up      | Q9CYC6         | Dcp2        | 0.62                | up      |
| Q5XKE0      | Mybpc2      | 1.37                | up      | A0A0B4J1F9     | Tchh        | 0.61                | up      |
| Q64518      | Atp2a3      | 1.37                | up      | O70250         | Pgam2       | 0.56                | up      |
| Q8C0S1      | Dis3l       | 1.35                | up      | P61514         | Rpl37a      | 0.54                | up      |
| Q8CHT3      | Ints5       | 1.34                | up      | Q6NZQ2         | Ddx31       | 0.53                | up      |
| P20801      | Tnnc2       | 1.30                | up      | Q8BP67         | Rpl24       | 0.52                | up      |
| O09165      | Casq1       | 1.29                | up      | Q9D3B1         | Hacd2       | 0.50                | up      |
| Q9QZ47      | Tnnt3       | 1.23                | up      | Q62186         | Ssr4        | 0.50                | up      |
| E9PUL3      | Clca3b      | 1.21                | up      | P97864         | Casp7       | 0.49                | up      |
| Q8C7B8      | Zswim4      | 1.18                | up      | P56379         | Mp68        | 0.48                | up      |
| Q8CD54      | Piezo2      | 1.16                | up      | Q3UUI3         | Them4       | 0.47                | up      |
| Q62388      | Atm         | 1.16                | up      | P68433         | Hist1h3a    | 0.47                | up      |
| Q9CWF6      | Bbs2        | 1.14                | up      | P70402         | Mybph       | 0.46                | up      |
| Q8BX37      | Pap1        | 1.12                | up      | Q9DCD6         | Gabarap     | 0.45                | up      |
| P97457      | Mylpf       | 1.08                | up      | P07310         | Ckm         | 0.45                | up      |
| Q14BI5      | Myom2       | 1.08                | up      | G3X9G9         | Mettl7a3    | 0.43                | up      |
| Q9JJH7      | Trpm5       | 1.07                | up      | P62897         | Cycs        | 0.43                | up      |
| P35762      | Cd81        | 1.04                | up      | P56371         | Rab4a       | 0.43                | up      |
| P07903      | Ercc1       | 1.00                | up      | Q9CPQ8         | Atp5l       | 0.42                | up      |
| Q62421      | Sh3gl3      | 0.99                | up      | A2ADA5         | Pusl1       | 0.40                | up      |
| P07934      | Phkg1       | 0.99                | up      | B2RRE7         | Otud4       | 0.40                | up      |
| P58771      | Tpm1        | 0.99                | up      | Q99JW4         | Lims1       | 0.39                | up      |
| Q5SX39      | Myh4        | 0.97                | up      | Q8BY89         | Slc44a2     | 0.39                | up      |
| Q91VB4      | Hps3        | 0.97                | up      | Q9CRC0         | Vkorc1      | 0.39                | up      |
| Q9CPQ8      | Atp5l       | -0.64               | down    | Q8BK08         | Tmem11      | -0.53               | down    |
| A2ABU4      | Myom3       | -0.65               | down    | Q01149         | Col1a2      | -0.54               | down    |
| Q9CQX6      | Gm16286     | -0.65               | down    | P13541         | Myh3        | -0.54               | down    |
| Q60872      | Eif1a       | -0.66               | down    | O88207         | Col5a1      | -0.54               | down    |
| G3X9G9      | Mettl7a3    | -0.67               | down    | Q91W97         | Hkdc1       | -0.55               | down    |
| Q9CRC0      | Vkorc1      | -0.67               | down    | Q61809         | Lrrn1       | -0.56               | down    |
| Q6NZQ2      | Ddx31       | -0.68               | down    | Q9Z148         | Ehmt2       | -0.56               | down    |
| Q9CR39      | Wdr45b      | -0.68               | down    | Q3UFS0         | Zyg11b      | -0.59               | down    |
| Q9CWS4      | Cpsf3l      | -0.69               | down    | Q9DBS2         | Tprg1l      | -0.60               | down    |
| Q62186      | Ssr4        | -0.70               | down    | P11087         | Col1a1      | -0.60               | down    |
| Q8BHJ6      | Serinc5     | -0.74               | down    | Q8BIQ6         | Zfp947      | -0.60               | down    |
| P62843      | Rps15       | -0.75               | down    | Q8BX37         | Pap1        | -0.62               | down    |
| G3UW82      | Myh2        | -0.75               | down    | Q8R2N2         | Cirh1a      | -0.63               | down    |
| Q9WTN0      | Ggps1       | -0.77               | down    | Q8C1F4         | Csgalnact2  | -0.63               | down    |
| P83882      | Rpl36a      | -0.77               | down    | Q62388         | Atm         | -0.63               | down    |
| Q3UUI3      | Them4       | -0.78               | down    | P22907         | Hmbs        | -0.64               | down    |
| P68433      | Hist1h3a    | -0.79               | down    | Q91VB4         | Hps3        | -0.65               | down    |
| Q8BP67      | Rpl24       | -0.81               | down    | Q32M07         | Ak8         | -0.72               | down    |
| Q9CWF2      | Tubb2b      | -0.82               | down    | Q91X83         | Mat1a       | -0.72               | down    |
| P56379      | Mp68        | -0.87               | down    | Q8CE50         | Snx30       | -0.73               | down    |
| Q8HWE5      | Mill2       | -0.87               | down    | P04919         | Slc4a1      | -0.74               | down    |
| Q6NZQ6      | Znf740      | -0.99               | down    | Q8CD54         | Piezo2      | -0.75               | down    |
| Q8BGH4      | Reep1       | -1.07               | down    | Q62421         | Sh3gl3      | -0.78               | down    |
| Q9DCT8      | Crip2       | -1.08               | down    | Q9CWF6         | Bbs2        | -0.82               | down    |
| Q8CI43      | Myl6b       | -1.11               | down    | P61208         | Arl4c       | -0.84               | down    |
| P61514      | Rpl37a      | -1.15               | down    | Q3LR78         | Zbtb38      | -0.99               | down    |
| Q9JJW5      | Myoz2       | -1.33               | down    | E9PUL3         | Clca3b      | -1.01               | down    |
| P19123      | Tnnc1       | -3.33               | down    | Q8CHT3         | Ints5       | -1.08               | down    |
| P09542      | Myl3        | -3.60               | down    | Q3UX10         | Tubal3      | -1.52               | down    |
| P51667      | Myl2        | -3.99               | down    | Q9ET80         | Jph1        | -2.39               | down    |



**Table S5. List of top 30 upregulated and downregulated miRNAs**

| Accession    | MiRNA name        | Log <sub>2</sub> FC | up/down | Accession    | MiRNA name        | Log <sub>2</sub> FC | up/down |
|--------------|-------------------|---------------------|---------|--------------|-------------------|---------------------|---------|
| MIMAT0027797 | mmu-miR-6948-3p   | 2.64                | up      | MIMAT0004877 | mmu-miR-466c-5p   | -2.42               | down    |
| MIMAT0022704 | mmu-miR-489-5p    | 2.57                | up      | MIMAT0027820 | mmu-miR-6960-5p   | -2.06               | down    |
| MIMAT0049867 | mmu-miR-12200-5p  | 2.55                | up      | MIMAT0017050 | mmu-miR-32-3p     | -1.91               | down    |
| MIMAT0003182 | mmu-miR-494-3p    | 2.30                | up      | MIMAT0009416 | mmu-miR-1949      | -1.90               | down    |
| MIMAT0016989 | mmu-miR-146a-3p   | 2.29                | up      | MIMAT0000246 | mmu-miR-122-5p    | -1.70               | down    |
| MIMAT0004704 | mmu-miR-335-3p    | 2.29                | up      | MIMAT0000904 | mmu-miR-215-5p    | -1.70               | down    |
| MIMAT0004861 | mmu-miR-877-5p    | 2.22                | up      | MIMAT0009396 | mmu-miR-1933-5p   | -1.70               | down    |
| MIMAT0019350 | mmu-miR-3966      | 2.22                | up      | MIMAT0014834 | mmu-miR-3064-5p   | -1.70               | down    |
| MIMAT0017055 | mmu-miR-219a-1-3p | 2.22                | up      | MIMAT0025113 | mmu-miR-6369      | -1.70               | down    |
| MIMAT0027699 | mmu-miR-6899-3p   | 2.22                | up      | MIMAT0017084 | mmu-miR-181b-2-3p | -1.56               | down    |
| MIMAT0020629 | mmu-miR-5121      | 2.01                | up      | MIMAT0003486 | mmu-miR-491-5p    | -1.45               | down    |
| MIMAT0000766 | mmu-miR-335-5p    | 1.87                | up      | MIMAT0017258 | mmu-miR-500-5p    | -1.45               | down    |
| MIMAT0004875 | mmu-miR-466b-5p   | 1.87                | up      | MIMAT0003508 | mmu-miR-501-5p    | -1.45               | down    |
| MIMAT0027822 | mmu-miR-6961-5p   | 1.87                | up      | MIMAT0017283 | mmu-miR-598-5p    | -1.45               | down    |
| MIMAT0027938 | mmu-miR-7017-5p   | 1.87                | up      | MIMAT0009390 | mmu-miR-1927      | -1.45               | down    |
| MIMAT0035718 | mmu-miR-935       | 1.87                | up      | MIMAT0009394 | mmu-miR-1931      | -1.45               | down    |
| MIMAT0017020 | mmu-miR-26a-1-3p  | 1.87                | up      | MIMAT0009398 | mmu-miR-1934-5p   | -1.45               | down    |
| MIMAT0027765 | mmu-miR-6932-3p   | 1.87                | up      | MIMAT0017182 | mmu-miR-450a-1-3p | -1.45               | down    |
| MIMAT0028091 | mmu-miR-7092-3p   | 1.87                | up      | MIMAT0003898 | mmu-miR-760-3p    | -1.45               | down    |
| MIMAT0020633 | mmu-miR-5123      | 1.82                | up      | MIMAT0027805 | mmu-miR-6952-3p   | -1.45               | down    |
| MIMAT0028088 | mmu-miR-7091-5p   | 1.82                | up      | MIMAT0027831 | mmu-miR-6965-3p   | -1.45               | down    |
| MIMAT0031426 | mmu-miR-8120      | 1.82                | up      | MIMAT0027891 | mmu-miR-6994-3p   | -1.45               | down    |
| MIMAT0000519 | mmu-miR-200a-3p   | 1.82                | up      | MIMAT0029909 | mmu-miR-7689-3p   | -1.45               | down    |
| MIMAT0002107 | mmu-miR-466a-3p   | 1.82                | up      | MIMAT0009413 | mmu-miR-1947-5p   | -1.45               | down    |
| MIMAT0031397 | mmu-miR-1291      | 1.70                | up      | MIMAT0010560 | mmu-miR-1249-3p   | -1.40               | down    |
| MIMAT0005293 | mmu-miR-467e-5p   | 1.67                | up      | MIMAT0000209 | mmu-miR-129-5p    | -1.37               | down    |
| MIMAT0022353 | mmu-miR-3544-5p   | 1.67                | up      | MIMAT0009393 | mmu-miR-1930-5p   | -1.37               | down    |
| MIMAT0014905 | mmu-miR-3092-5p   | 1.62                | up      | MIMAT0000216 | mmu-miR-187-3p    | -1.37               | down    |
| MIMAT0005837 | mmu-miR-1187      | 1.58                | up      | MIMAT0001342 | mmu-miR-425-3p    | -1.37               | down    |
| MIMAT0029894 | mmu-miR-181b-1-3p | 1.42                | up      | MIMAT0017067 | mmu-miR-181b-1-3p | -1.26               | down    |
