# Supplementary material for: Investigation of the Hydrogen Sulfide Signaling Pathway in Schwann Cells during Peripheral Nerve Degeneration: Multi-Omics Approaches
Source: Antioxidants (Basel). 2022 Aug 19;11(8):1606. doi: 10.3390/antiox11081606 (PMC9405209; doi:10.3390/antiox11081606)
Supplement: Supplementary file 1 [file antioxidants-11-01606-s001.zip]

Archive with 6 entries (6 files):
- antioxidants-1838690-Supplementary Material.pdf
- Proteomics clustering-Cluster 1.txt
- Proteomics clustering-Cluster 2.txt
- Proteomics clustering-Cluster 3.txt
- Proteomics clustering-Cluster 4.txt
- Proteomics clustering-Cluster 5.txt
