# Supplementary material for: Investigation of the Hydrogen Sulfide Signaling Pathway in Schwann Cells during Peripheral Nerve Degeneration: Multi-Omics Approaches
Source: Antioxidants (Basel). 2022 Aug 19;11(8):1606. doi: 10.3390/antiox11081606 (PMC9405209; doi:10.3390/antiox11081606)
Supplement: Supplementary file 1 [file antioxidants-11-01606-s001.zip › Proteomics clustering-Cluster 1.txt]

GeneID	Control	X1DAY	X1DAY.NEM
P48758;A0A1B0GRG8	0.603781827	0.550509009	-1.154290837
Q3UDE2	0.599903281	0.554499669	-1.15440295
O08759	0.601198164	0.553169373	-1.154367538
A3KMP2	0.60125597	0.55310994	-1.15436591
O54819	0.601307507	0.553056948	-1.154364455
P52332	0.607965192	0.546184296	-1.154149488
Q5IRJ6	0.607666328	0.546493965	-1.154160292
O35118	0.606978094	0.547206665	-1.154184759
Q6PDJ6	0.607310744	0.546862262	-1.154173006
Q80XG9	0.61128644	0.542735626	-1.154022066
Q921Y0;Q8BPB0	0.609815105	0.544265077	-1.154080181
P48036	0.629999138	0.523049245	-1.153048383
Q9R0P5	0.631556159	0.521391326	-1.152947485
Q9Z280	0.631516617	0.521433469	-1.152950086
Q62264	0.628199775	0.524961363	-1.153161138
Q9D799	0.626532697	0.526729238	-1.153261935
Q62148	0.622907646	0.530561348	-1.153468994
Q6NSQ9	0.622907895	0.530561086	-1.15346898
Q80U44	0.621337823	0.532215708	-1.153553531
Q8R3N1	0.621337055	0.532216517	-1.153553572
Q62159	0.61528834	0.538562184	-1.153850524
P37172	0.617438274	0.536311918	-1.153750192
Q9ESD6	0.616298834	0.537505246	-1.153804081
O54782	0.61688289	0.53689377	-1.15377666
Q9CQZ5	0.616731374	0.53705244	-1.153783814
Q8K0V4	0.548995579	0.605248134	-1.154243713
Q8CFK2	0.554741773	0.59966741	-1.154409183
Q3UIK4	0.553106238	0.60125957	-1.154365808
Q923D2	0.552550985	0.601799422	-1.154350408
O35218	0.5616121	0.592946711	-1.154558811
Q9Z1K6	0.560306308	0.594228131	-1.154534439
Q62188	0.568741255	0.585916703	-1.154657959
Q62420	0.569847875	0.584820306	-1.154668181
O88643	0.567327928	0.587314948	-1.154642877
P47968	0.566389779	0.588241835	-1.154631613
Q8BXC6	0.565659803	0.588962356	-1.154622159
Q08509	0.581830448	0.572858472	-1.15468892
Q91UZ1	0.574695072	0.580001402	-1.154696474
P70232	0.575188328	0.579509515	-1.154697843
Q9DBC7	0.575028281	0.579669148	-1.15469743
P60843	0.577400018	0.577300519	-1.154700537
P02468	0.577350269	0.577350269	-1.154700538
P58801	0.577307653	0.577392884	-1.154700537
P15532	0.576310777	0.578389137	-1.154699915
Q8BWG8	0.576557384	0.578142792	-1.154700176
Q08331	0.595719448	0.558784166	-1.154503614
Q8BTU1	0.595374927	0.559136043	-1.154510971
Q6ZQ18	0.593186776	0.561367617	-1.154554393
Q9Z204	0.593574542	0.560972572	-1.154547113
Q8BW75	0.587777881	0.566859496	-1.154637378
Q99JW2	0.590882305	0.563711672	-1.154593977
O35900	0.590419366	0.564181805	-1.154601171
Q9CWU0	0.589960281	0.564647774	-1.154608054
A2AJ76	0.541276323	0.612687915	-1.153964238
Q9D620;G3XA57	0.539644114	0.614252698	-1.153896812
Q6PHS6	0.528466175	0.624891553	-1.153357728
Q80YA3	0.528385917	0.624967455	-1.153353373
Q60692	0.530918398	0.622569089	-1.153487487
Q8R0S2	0.529740131	0.62368581	-1.153425942
Q9WV70	0.536384649	0.617368871	-1.15375352
P07309	0.532352432	0.621207955	-1.153560387
P19096	0.533134273	0.620464929	-1.153599202
Q99LB6	0.53344243	0.62017189	-1.15361432
P70441	0.520834091	0.63207883	-1.152912921
Q99KQ4	0.520559701	0.632336079	-1.15289578
Q99MV1	0.520599761	0.632298527	-1.152898288
Q99MD9	0.520417942	0.632468952	-1.152886894
Q9DCC4	0.520376755	0.632507553	-1.152884308
P97765	0.5180872	0.634650554	-1.152737753
Q9R1V4	0.516930957	0.635730691	-1.152661648
Q8C0M9	0.525806725	0.627403026	-1.153209751
Q6A028	0.526976328	0.62629943	-1.153275758
Q8K3C3	0.526918141	0.626354368	-1.153272509
O88342	0.522214934	0.630783037	-1.152997972
Q6PDS3	0.522745021	0.630285065	-1.153030086
Q921W4	0.523333503	0.629731887	-1.15306539
Q3U308	0.524331451	0.62879297	-1.153124421
Q8VI63	0.524105704	0.629005456	-1.15311116
Q3U1U7	0.502532594	0.649064611	-1.151597205
Q6PGH0;Q91WB7	0.504157929	0.647570182	-1.151728111
Q8K0G5	0.503839051	0.647863592	-1.151702643
P61216	0.513887955	0.638566702	-1.152454657
Q8C0D0	0.512694464	0.639676367	-1.152370831
Q8VCR7	0.511813881	0.640494149	-1.15230803
O35098	0.51031554	0.641883777	-1.152199317
Q9DCS2	0.509488728	0.642649601	-1.152138328
P70700	0.506435904	0.645471097	-1.151907001
Q8R5F7	0.5081175	0.643918117	-1.152035618
P62869;A6PWE0	0.476968365	0.672216582	-1.149184948
Q9Z0G0	0.478234151	0.671085689	-1.14931984
P97300	0.480400033	0.669146923	-1.149546956
Q9WUD8;J3QPY3	0.480787808	0.668799317	-1.149587125
P62077	0.483792246	0.666101012	-1.149893258
Q9CXW4	0.483062931	0.666756844	-1.149819775
Q9Z2U0;Q9CWH6	0.487000451	0.663209717	-1.150210168
Q8BFR1	0.489845992	0.660636598	-1.15048259
Q9DBM1	0.489051541	0.661355812	-1.150407354
Q62165	0.488718478	0.661657145	-1.150375622
Q80TL4	0.488874037	0.66151642	-1.150390457
O09174	0.487947139	0.662354567	-1.150301707
Q8K0D2	0.488302677	0.662033175	-1.150335852
Q149L6	0.496492741	0.654594268	-1.151087009
P97351	0.49668128	0.654422219	-1.151103499
Q8BMF4	0.496741502	0.654367256	-1.151108758
Q5NBX1	0.492674327	0.658070933	-1.15074526
A6H619	0.494301888	0.656590851	-1.150892739
P62774	0.494978649	0.655974622	-1.150953271
Q3THS6	0.467959482	0.680219604	-1.148179086
Q9CPX6	0.467728026	0.680424164	-1.14815219
Q3V1V3	0.472310612	0.67636429	-1.148674903
Q64318	0.472294442	0.676378653	-1.148673095
P59279	0.470769696	0.677731749	-1.148501445
P54728	0.470432032	0.67803109	-1.148463123
Q4KMM3	0.470158401	0.678273584	-1.148431985
Q0VGB7	0.458279679	0.688729869	-1.147009548
Q61166	0.458888502	0.688197295	-1.147085797
Q6NZK8	0.459346633	0.687796303	-1.147142936
P24547	0.46108186	0.686275649	-1.147357509
P56212	0.463092658	0.684509833	-1.147602491
P45481;Q64127;B2RWS6	0.45364624	0.692771256	-1.146417496
Q8BUR9	0.453997221	0.692465849	-1.14646307
Q9JI46	0.450558295	0.695453125	-1.14601142
P15306	0.448330057	0.697382648	-1.145712705
Q8R5A6;Q80VE5	0.447491851	0.698107253	-1.145599104
A2AR02	0.439145368	0.705285959	-1.144431327
Q62147	0.437266135	0.706893132	-1.144159267
Q505D1	0.441869186	0.702950528	-1.144819714
P11531	0.444866503	0.700372441	-1.145238944
Q91V88	0.443485409	0.701561427	-1.145046836
Q3TH73	0.671722148	0.477521995	-1.149244143
Q8BKY8	0.669795073	0.479676537	-1.149471609
P41233	0.670696745	0.478669077	-1.149365821
P70444	0.670684854	0.478682369	-1.149367224
O88673	0.668206356	0.481448904	-1.149655261
Q8K2V1	0.667592834	0.482132413	-1.149725247
P70336	0.664800694	0.485236509	-1.150037203
Q8BGA2	0.666286144	0.48358643	-1.149872575
Q6I6G8	0.67376553	0.475231764	-1.148997294
Q8C1A5	0.677429573	0.471110429	-1.148540002
P45376	0.676033362	0.472683122	-1.148716484
P63054	0.675523184	0.473257101	-1.148780285
P63248	0.67530341	0.473504247	-1.148807657
Q62348	0.679587617	0.468674189	-1.148261806
Q99K85	0.680954786	0.467127359	-1.148082145
Q9JMG7	0.682092534	0.465838069	-1.147930603
P11404	0.683711449	0.464000336	-1.147711785
Q9DCD0	0.683406853	0.464346389	-1.147753242
Q0VGY8	0.686263787	0.461095382	-1.147359169
Q9CZY3	0.684972201	0.462566577	-1.147538778
P63158	0.642081145	0.510102527	-1.152183672
Q3UGS4	0.642222695	0.509949726	-1.152172421
O88544	0.644291048	0.507713973	-1.152005021
Q9CY21	0.643633081	0.508425799	-1.15205888
Q9D172	0.643891892	0.50814587	-1.152037762
Q3UWL8	0.633323351	0.519505861	-1.152829212
Q9R062	0.633600931	0.51920934	-1.152810271
P42208	0.635362129	0.517325656	-1.152687785
Q8VBW6	0.634791842	0.517936041	-1.152727884
O88286	0.636846046	0.515735436	-1.152581482
P0CL69	0.639296589	0.513103111	-1.1523997
Q61214;Q9Z188;Q5U4C9	0.660359405	0.490151994	-1.150511399
P61264	0.660720204	0.489753676	-1.15047388
Q64105	0.660843447	0.489617577	-1.150461024
P60487	0.656729849	0.494149166	-1.150879015
Q8CI75	0.656685763	0.494197607	-1.150883371
P49446	0.658052314	0.49269482	-1.150747134
Q76MZ3	0.65855315	0.492143422	-1.150696572
Q8BJU0	0.658677329	0.492006654	-1.150683983
Q61035	0.653799209	0.49736367	-1.151162879
O35593	0.652618209	0.498655807	-1.151274016
Q08024	0.652882689	0.4983666	-1.151249289
P13346	0.64739449	0.504348817	-1.151743307
Q3TYA6	0.647012927	0.504763242	-1.151776169
Q921Z5	0.649585745	0.501965115	-1.15155086
Q9D8S9	0.649428719	0.502136143	-1.151564862
Q80TN4	0.650331067	0.501152884	-1.151483951
P62137	0.649828538	0.501700607	-1.151529145
Q9D8S4	0.650048343	0.501461075	-1.151509419
Q9DBE9	0.752236746	0.382567932	-1.134804677
Q9DA03	0.753825261	0.380590245	-1.134415506
Q9JK81	0.755337208	0.378703842	-1.13404105
Q80U87	0.749426844	0.386055632	-1.135482476
Q91YJ3	0.748771689	0.386866885	-1.135638574
Q91X85	0.743990013	0.392765835	-1.136755848
Q9DB90	0.744614993	0.391997014	-1.136612007
O09172	0.745896142	0.39041895	-1.136315092
P68510	0.746649033	0.389490282	-1.136139315
Q08890	0.747181757	0.388832605	-1.136014361
Q8BGF0	0.74109353	0.396320423	-1.137413953
Q9JM63	0.74172598	0.395545471	-1.13727145
Q9Z2Z9	0.741586749	0.39571613	-1.137302879
Q9CR27	0.737383531	0.400853	-1.138236531
Q61753	0.738671034	0.399282611	-1.137953646
Q8C754	0.738301287	0.399733878	-1.138035165
Q9JK38	0.73569805	0.402904687	-1.138602737
Q9R1C0	0.734759962	0.404044577	-1.138804539
P62838	0.734084712	0.404864197	-1.138948909
Q7TMV3	0.734069364	0.404882818	-1.138952182
Q08761	0.728011638	0.412202459	-1.140214097
Q8R550	0.730006846	0.409798167	-1.139805013
Q9R0Q6	0.731613822	0.407857042	-1.139470864
Q6PGH2;Q6UY53	0.724391665	0.416548372	-1.140940037
Q6W8Q3	0.721227703	0.420329777	-1.14155748
Q8BVQ5	0.719733755	0.422109779	-1.141843534
Q8K094	0.720124596	0.42164444	-1.141769036
Q80TN5;Q9CWU2	0.71802939	0.424136214	-1.142165604
O70252	0.716085194	0.426442264	-1.142527457
Q8R344	0.716648549	0.425774662	-1.142423211
Q91YI0	0.713922901	0.429000106	-1.142923007
P46662	0.710153793	0.433441456	-1.143595249
Q811P8	0.710178402	0.433412529	-1.143590931
P61290	0.709976071	0.433650338	-1.143626409
Q91VI7	0.709811635	0.433843561	-1.143655196
A0A494B9V8	0.712256593	0.430966304	-1.143222896
Q8R2R9	0.711386226	0.431991614	-1.143377839
Q9D8Y0	0.711451712	0.43191451	-1.143366222
Q91ZE0	0.711006314	0.432438792	-1.143445107
Q9D125	0.71071124	0.43278596	-1.1434972
Q9CR09	0.694146982	0.452063529	-1.14621051
Q3UMR5	0.695352163	0.450674736	-1.146026899
Q8BH69	0.69588008	0.450065716	-1.145945795
Q99P51	0.68998926	0.456838343	-1.146827603
Q9D0B0	0.690468343	0.456289441	-1.146757783
O55192	0.69240237	0.454070155	-1.146472526
P61750	0.691531719	0.455069898	-1.146601617
Q6PIP5	0.70025186	0.445006448	-1.145258308
Q9DBD5	0.699909408	0.445403778	-1.145313186
Q8CI70	0.705278347	0.439154259	-1.144432606
Q8K389	0.706029555	0.438276383	-1.144305938
Q9CSH3	0.70369488	0.441001938	-1.144696818
Q60936	0.702392557	0.442518735	-1.144911292
Q9D154;Q5SV42	0.70295659	0.441862126	-1.144818716
Q9CXP8	0.808146712	0.310191419	-1.118338131
Q6PDI6	0.808904961	0.309168268	-1.118073229
Q9QXB9	0.809244898	0.308709186	-1.117954084
P01942;P06467	0.812581866	0.304189914	-1.11677178
Q9CY45	0.812677343	0.304060268	-1.11673761
Q9WVJ2	0.812688941	0.304044517	-1.116733458
Q8CG46	0.810607501	0.306866601	-1.117474102
Q9R0B9	0.810271773	0.307320948	-1.117592721
Q04646	0.811080004	0.306226758	-1.117306762
Q9EPB5	0.811820214	0.305223464	-1.117043678
Q11136	0.805083791	0.314312391	-1.119396181
Q8BP00	0.802462288	0.317824283	-1.120286571
Q8CBH5	0.802779496	0.317400075	-1.120179572
Q8VDQ1	0.802870095	0.317278879	-1.120148974
Q61508	0.798243151	0.323447386	-1.121690537
P56528	0.797501458	0.324432213	-1.121933671
Q80TY0;P11260	0.797546909	0.324371894	-1.121918804
Q91ZT5	0.800832264	0.320000945	-1.120833208
Q9DBJ1	0.799264381	0.322089596	-1.121353977
Q60631	0.784128674	0.342004234	-1.126132908
P49935	0.783540372	0.342769374	-1.126309745
Q9EQF6	0.783364781	0.342997617	-1.126362399
A0A1Y7VKT9;Q9EPV8	0.786257933	0.339229448	-1.125487381
Q8K1S1	0.787519741	0.337581016	-1.125100758
Q9D7I5	0.787060458	0.338181379	-1.125241837
P84096	0.789780543	0.334619852	-1.124400395
Q99ME9	0.790525096	0.33364249	-1.124167586
Q9CY34	0.790790063	0.333294413	-1.124084476
Q9CQ71	0.791519578	0.332335375	-1.123854953
Q9Z0L0	0.791077737	0.332916354	-1.123994091
Q9D6X6	0.794285437	0.328689895	-1.122975332
Q9DAI2	0.792427686	0.331140109	-1.123567795
D3YWQ0	0.771433319	0.358372028	-1.129805348
P61089;Q9CQ37	0.771962938	0.357695153	-1.12965809
P23198	0.76898028	0.361500474	-1.130480754
Q9CWJ9	0.768401451	0.362237087	-1.130638538
P62254	0.766353519	0.364838423	-1.131191942
Q5F2E7	0.767023523	0.363988196	-1.131011719
Q60866	0.767152628	0.363824271	-1.130976899
P31786	0.779872759	0.347524711	-1.12739747
Q8JZU2	0.780649341	0.346519923	-1.127169264
Q99MK9	0.780897081	0.346199145	-1.127096225
Q9Z1R4	0.777671733	0.35036641	-1.128038144
O55057	0.775966603	0.352561683	-1.128528285
Q8BLR9	0.775059115	0.353727837	-1.128786953
Q9EPC1	0.775361728	0.353339138	-1.128700866
Q99LY9	0.825202498	0.286884725	-1.112087223
O55137;Q9QYR7;Q6Q2Z6;Q8BWN8	0.823070904	0.289831581	-1.112902485
Q6A0A2	0.82380851	0.288812987	-1.112621498
Q8VDM4	0.815769718	0.299850844	-1.115620562
Q9ER04	0.816029172	0.299496752	-1.115525924
P13634	0.818210504	0.296514106	-1.11472461
Q9D6Y4	0.819518421	0.29472086	-1.11423928
P09803	0.828935643	0.28169974	-1.110635384
Q9CXJ4	0.827833959	0.283233078	-1.111067037
A2A654	0.831091088	0.278691953	-1.109783041
D3YXJ0	0.830279228	0.27982607	-1.110105298
P98086	0.830391307	0.279669592	-1.110060898
O70456	0.832376051	0.27689392	-1.10926997
Q9WUI1	0.833252823	0.275664928	-1.108917752
Q8CI11	0.834596284	0.273778396	-1.10837468
Q80TA6	0.834948511	0.27328311	-1.108231621
Q9JKX6	0.834791174	0.273504386	-1.108295559
Q9CQR4	0.835734907	0.272176295	-1.107911201
Q9CXW3	0.836648467	0.270888729	-1.107537196
Q91V76	0.836190067	0.271535033	-1.1077251
Q9D0I8	0.836259349	0.271437382	-1.107696731
A2ADY9;Q9DAF3	0.83903818	0.267511622	-1.106549802
Q9EPQ7	0.838364744	0.268464643	-1.106829387
D3Z286	0.842317367	0.262856002	-1.105173369
O54785	0.840737211	0.265102551	-1.105839762
Q8R1S0	0.841196627	0.264449988	-1.105646615
Q8QZX2	0.841450511	0.264089156	-1.105539667
Q8VE38	0.841464863	0.264068754	-1.105533617
P50580	0.870604508	0.221611624	-1.092216132
Q11011	0.871425404	0.220384336	-1.09180974
Q8BFS6	0.867493938	0.226245986	-1.093739924
P48377	0.869188931	0.223723809	-1.092912741
Q9JKK7	0.868940403	0.224094095	-1.093034498
O08553	0.873549964	0.21719967	-1.090749634
Q8BYY4	0.874690934	0.215484394	-1.090175328
A2APY7	0.875367456	0.21446569	-1.089833146
Q9CQ26	0.875353736	0.214486361	-1.089840097
O08709;Q8BG37	0.880388991	0.20686533	-1.087254321
Q9D7M8	0.87774418	0.210876989	-1.088621169
Q9JL15	0.846491856	0.256892773	-1.103384629
Q8BVI4	0.847208412	0.255865021	-1.103073433
Q9CT10	0.847361488	0.255645306	-1.103006794
O08992	0.847796696	0.25502033	-1.102817026
Q3V4B5	0.847575722	0.255337713	-1.102913436
P16056	0.852969716	0.247556682	-1.100526398
P50228	0.853010665	0.247497341	-1.100508006
Q91YE6	0.853848513	0.246282278	-1.100130791
Q99M80	0.853465692	0.246837666	-1.100303358
Q9Z0V2;Q9Z0V1	0.850904969	0.250543485	-1.101448454
O08792	0.849492722	0.252580434	-1.102073156
Q5SQM0	0.849464105	0.252621659	-1.102085764
Q9D0B6	0.855829003	0.243403261	-1.099232264
Q9D964	0.858002796	0.240232045	-1.098234841
A2AF31;A2AF33	0.85831423	0.239776748	-1.098090977
Q8BG73	0.858282696	0.239822859	-1.098105555
Q9CWG9	0.862841201	0.233130975	-1.095972176
Q9DD18	0.863095012	0.232756829	-1.095851841
P70202	0.860962298	0.235895578	-1.096857875
Q61292	0.861136303	0.235639925	-1.096776228
Q64261	0.859589006	0.237910563	-1.097499569
Q8CAY6;Q80X81	0.859869441	0.237499478	-1.097368918
Q8BYK4	1.136381761	-0.39077225	-0.745609511
Q9JJG9	1.136283553	-0.390252018	-0.746031535
Q9DCJ5	1.136047209	-0.389005296	-0.747041912
Q6ZPS6	1.135750176	-0.38744878	-0.748301396
Q80TI0	1.135726262	-0.387323959	-0.748402303
Q8R5J9	1.135721074	-0.387296889	-0.748424185
Q9EQZ6	1.137675329	-0.397749573	-0.739925756
P14152	1.137607608	-0.397378319	-0.74022929
Q8CG19	1.137603335	-0.397354914	-0.740248421
P62488	1.137522457	-0.396912475	-0.740609982
Q8VEF1	1.137424557	-0.396378203	-0.741046353
Q9WTL7	1.137174738	-0.395021208	-0.742153529
A2A6Q5	1.136834014	-0.393184823	-0.743649191
P16125	1.136927391	-0.393686466	-0.743240925
Q8VE70	1.138434388	-0.401958835	-0.736475553
Q9CQE8	1.138533683	-0.402516162	-0.736017521
O35969	1.139099549	-0.405723147	-0.733376402
P40338	1.138753311	-0.403754578	-0.734998733
Q8CAS9	1.138697834	-0.403441016	-0.735256818
Q6NZL8	1.138915001	-0.404671381	-0.73424362
Q61475	1.138873699	-0.404436777	-0.734436922
P16054;P23298	1.138847222	-0.404286533	-0.734560688
Q99JI1	1.138837357	-0.404230587	-0.73460677
E9Q3C1	1.139903439	-0.410373801	-0.729529638
P63260	1.139537137	-0.408240444	-0.731296693
P62965	1.139677571	-0.409055468	-0.730622103
Q9WVT6	1.139612689	-0.408678475	-0.730934213
P21107	1.140152022	-0.411835607	-0.728316415
Q9QYB8	1.140266532	-0.412512907	-0.727753625
Q8BH04	1.140361355	-0.413075664	-0.727285691
Q91X52	1.140419192	-0.413419771	-0.726999421
Q8R4V2	1.140611482	-0.414568507	-0.726042974
Q9CPW7	1.140530824	-0.414085772	-0.726445052
Q8CFV9	1.129995752	-0.35924997	-0.770745782
Q8VEH3	1.129868282	-0.358661872	-0.77120641
P63101	1.129824743	-0.358461316	-0.771363427
Q91YU8	1.129811302	-0.358399436	-0.771411866
Q99N05	1.129190787	-0.355559215	-0.773631573
Q9CVB6	1.129506525	-0.357000388	-0.772506137
Q9Z0N2	1.129648514	-0.3576512	-0.771997314
O35855	1.13114873	-0.364634294	-0.766514436
E9Q1F5	1.131494933	-0.366274629	-0.765220304
Q99PP9	1.131402279	-0.365834528	-0.765567751
P14148	1.130701315	-0.362530783	-0.768170532
Q9JJX7	1.130424741	-0.361239508	-0.769185233
Q8BGA5	1.130338477	-0.360838144	-0.769500333
Q8R3P0	1.130296083	-0.360641136	-0.769654946
A2RSQ0	1.133125299	-0.374156069	-0.75896923
Q91WE1	1.132935721	-0.373225814	-0.759709908
Q8BH48	1.131905424	-0.368234267	-0.763671157
Q91VF2	1.132332807	-0.370291925	-0.762040881
Q8BTS4	1.132621484	-0.371692061	-0.760929423
Q6P4T0	1.132532933	-0.371261681	-0.761271252
P97355	1.132569856	-0.371441041	-0.761128815
Q8VI84	1.132577484	-0.371478112	-0.761099373
Q8BTY8	1.135312806	-0.385177294	-0.750135512
P22892	1.135017575	-0.383657412	-0.751360163
Q9DCM2	1.135037758	-0.383760978	-0.75127678
P28352	1.133944294	-0.378218994	-0.755725301
Q8CGA4	1.133974204	-0.378368763	-0.755605441
P16382	1.134390162	-0.38046206	-0.753928101
Q811Q9	1.134457438	-0.380802483	-0.753654955
O35215	1.13486382	-0.382870042	-0.751993777
Q5SYL3	1.134691688	-0.381991914	-0.752699774
Q922Q8	1.149217118	-0.47726889	-0.671948228
Q9EQQ9	1.149221121	-0.477306337	-0.671914784
P39054	1.149319298	-0.478229034	-0.671090264
O35643	1.14937999	-0.478803454	-0.670576536
Q9QUR6	1.149401986	-0.479012403	-0.670389583
P62715	1.14969455	-0.481832054	-0.667862496
Q3KNK3	1.149469121	-0.479652728	-0.669816393
P57746	1.149549632	-0.480425819	-0.669123813
Q9EQ80	1.149555344	-0.480480888	-0.669074456
P56389	1.150434274	-0.489335037	-0.661099238
Q8VE96	1.150255501	-0.487468112	-0.662787389
O88958	1.150357389	-0.488527624	-0.661829765
Q91XL2	1.150313811	-0.488073026	-0.662240785
Q91XE4	1.150105243	-0.485926604	-0.664178639
Q61699	1.15017374	-0.486626281	-0.663547459
Q8C3Q9	1.150178076	-0.486670742	-0.663507334
Q9CQ86	1.149975007	-0.484609898	-0.66536511
E9PYG6	1.149888418	-0.483744049	-0.666144369
Q03311	1.149848066	-0.483343088	-0.666504977
Q9CPW0	1.152389845	-0.512963336	-0.639426509
Q8BWB1	1.152180348	-0.510057347	-0.642123001
Q2TBE6	1.152229788	-0.510732278	-0.64149751
P70265;A7UAK5	1.152207368	-0.510425406	-0.641781962
Q9R0M6	1.152217005	-0.510557149	-0.641659856
P10126	1.15230608	-0.511786714	-0.640519366
Q63844	1.152264386	-0.511208481	-0.641055905
O55143	1.152252774	-0.511048285	-0.641204488
Q9CPR5	1.152252452	-0.511043855	-0.641208597
Q9R0Y5	1.151994575	-0.50757672	-0.644417855
Q9R1A8	1.152004427	-0.507706167	-0.64429826
Q64339	1.152090488	-0.508846808	-0.64324368
Q8R146	1.152040136	-0.50817728	-0.643862856
Q9JI59	1.152054482	-0.508367408	-0.643687074
O70318	1.151820776	-0.505329405	-0.64649137
P20917	1.151717662	-0.504026941	-0.647690721
Q9CXI5	1.151696514	-0.503762513	-0.647934001
Q9JJZ2	1.151206213	-0.49786514	-0.653341073
Q61496	1.151254914	-0.498432304	-0.65282261
Q922E4	1.151285119	-0.498786002	-0.652499117
Q8BHG2	1.151571342	-0.502215409	-0.649355933
P62761	1.151522591	-0.501620937	-0.649901653
Q8CIM3	1.151528485	-0.501692575	-0.64983591
O08739	1.151405072	-0.500205709	-0.651199362
Q3UE37	1.151472368	-0.501013102	-0.650459266
Q6Q477	1.150640518	-0.49153602	-0.659104498
Q8BM39	1.150739531	-0.492611693	-0.658127839
Q9CWW7	1.150695706	-0.492134003	-0.658561703
O88456;Q9D7J7	1.15104956	-0.496066092	-0.654983468
Q99LM9	1.15089165	-0.494289756	-0.656601894
P05480;Q62270;Q922K9;Q62190	1.15097701	-0.495245493	-0.655731518
P26041	1.150950641	-0.494949134	-0.656001507
Q9D7G0;G3UXL2;Q8C5R8	1.148175059	-0.467924802	-0.680250257
Q64514	1.14817184	-0.46789708	-0.68027476
Q62392	1.148205715	-0.468189084	-0.68001663
Q9WV76	1.148213078	-0.468252647	-0.679960431
Q9JJW5	1.148052245	-0.466871882	-0.681180364
Q99PN3	1.148004502	-0.466465058	-0.681539444
P97371	1.148023191	-0.466624148	-0.681399043
Q8VHP7	1.148023976	-0.466630835	-0.681393142
Q9ESW4	1.148692916	-0.472471838	-0.676221078
Q91X91	1.148778385	-0.473239966	-0.67553842
Q8R0S1;P16951	1.148785121	-0.473300728	-0.675484393
Q8R164	1.148783767	-0.473288511	-0.675495256
P35235	1.148519384	-0.470928098	-0.677591286
Q9Z0T9	1.148564795	-0.471330057	-0.677234738
P05063	1.148340622	-0.469359238	-0.678981385
Q923D5	1.148430589	-0.470146151	-0.678284438
Q61164	1.146257768	-0.452423265	-0.693834503
P50516	1.146065947	-0.450968915	-0.695097032
Q99NB8;Q8C5U9	1.146067472	-0.450980416	-0.695087056
O88738	1.1466822	-0.455697785	-0.690984415
Q3U213	1.146468916	-0.454042309	-0.692426607
Q9CQJ6	1.146395645	-0.453478281	-0.692917364
Q62426	1.147011741	-0.458297147	-0.688714594
Q6PGH1	1.147029295	-0.458437073	-0.688592222
Q9ERD6	1.14726231	-0.460309072	-0.686953237
Q99KB8	1.147148354	-0.45939016	-0.687758195
Q9WUL7	1.147154633	-0.459440619	-0.687714014
Q8VDC0	1.147668081	-0.463636572	-0.684031509
Q9QXG4	1.147703981	-0.4639353	-0.683768681
Q01405	1.147558422	-0.46272854	-0.684829882
O70480	1.147414586	-0.461547467	-0.685867118
Q61036	1.147434806	-0.461712833	-0.685721974
Q9JMD3	1.14742952	-0.461669577	-0.685759942
Q6ZWV3;P86048	1.14156921	-0.42040241	-0.721166799
P17751	1.141639124	-0.420835953	-0.720803171
Q9DB77	1.141655396	-0.420937011	-0.720718385
Q99J36	1.142089077	-0.423652526	-0.718436551
Q60716	1.142160508	-0.424103959	-0.718056548
Q80U19	1.142198267	-0.424343078	-0.717855189
O08738	1.141856049	-0.422188076	-0.719667973
Q80SY5	1.141972443	-0.422917981	-0.719054463
Q9DAU1	1.142395125	-0.425595247	-0.716799877
Q3U1J4	1.142674146	-0.427386222	-0.715287924
Q9EQN3	1.142594988	-0.426876167	-0.715718821
Q60604	1.143458155	-0.432525677	-0.710932477
Q99LB7	1.143450853	-0.43247705	-0.710973803
Q9JKL5	1.143053368	-0.429851887	-0.713201481
Q9JJA4	1.143189083	-0.430743413	-0.71244567
P15327	1.143169478	-0.430614322	-0.712555156
Q61584	1.143149968	-0.43048596	-0.712664009
P32507	1.142794275	-0.428163291	-0.714630983
P46664	1.142950227	-0.429177592	-0.713772634
Q80SZ7	1.142904499	-0.428879536	-0.714024964
P13595	1.144484531	-0.439515599	-0.704968933
Q80W21	1.144462655	-0.439363257	-0.705099398
O88986	1.144639286	-0.440597667	-0.704041619
Q9JKM7	1.14469919	-0.441018628	-0.703680562
Q5HZI1	1.143909131	-0.435558357	-0.708350774
Q8BGG7	1.143957199	-0.435885086	-0.708072113
P11798	1.144222327	-0.437699672	-0.706522655
Q6A000	1.144284286	-0.438126831	-0.706157455
Q8BHK2	1.144277187	-0.438077826	-0.706199361
Q9JLK7	1.145852136	-0.449365713	-0.696486423
O54829	1.145928854	-0.449938836	-0.695990018
Q8CJG0	1.145899434	-0.449718771	-0.696180663
Q8VDW0	1.145619806	-0.447644229	-0.697975577
Q9CZG3	1.145738311	-0.44851968	-0.697218631
Q05A62	1.145343774	-0.445625715	-0.699718059
Q9D1H8	1.145430254	-0.446255057	-0.699175197
A6H584	1.145122248	-0.444026001	-0.701096247
Q7TSE6	1.144860643	-0.442159135	-0.702701507
Q8CCT4	1.144854987	-0.442119033	-0.702735953
P47708	1.14490622	-0.442482687	-0.702423533
Q5XG71	1.144884528	-0.442328613	-0.702555916
Q9CVD2	1.144894562	-0.442399864	-0.702494698
Q06180	1.151050078	-0.654978094	-0.496071984
Q5SYD0	1.151001199	-0.655482976	-0.495518222
O88396	1.151309355	-0.652238467	-0.499070888
P14106	1.151332624	-0.651987292	-0.499345332
Q8BK58	1.151194619	-0.653463942	-0.497730677
P09450	1.151240221	-0.652979434	-0.498260788
Q8CI94	1.151280218	-0.652551717	-0.498728501
Q9ESZ8	1.151723421	-0.647624316	-0.504099105
Q62193	1.151889675	-0.645677421	-0.506212253
Q922R1	1.151828283	-0.646403177	-0.505425106
Q8CGC6	1.151423509	-0.650997397	-0.500426112
Q9CQJ4;O35730	1.151454466	-0.65065693	-0.500797536
O35671	1.151616428	-0.64884726	-0.502769167
Q3V3R1	1.151533463	-0.649780325	-0.501753139
Q9DBF1	1.149506199	-0.669498144	-0.480008055
Q3TIR3	1.149447585	-0.670000692	-0.479446892
Q8BTG3	1.149403374	-0.670377768	-0.479025606
Q9CRB6;Q0P5Y3	1.14989381	-0.666096061	-0.48379775
Q91ZZ3	1.149704776	-0.667772761	-0.481932015
Q9CYA0	1.149698753	-0.667825628	-0.481873124
P62069	1.149666435	-0.668108705	-0.481557729
Q9EQG7	1.149633893	-0.668392764	-0.481241129
Q5PRF0	1.150083662	-0.664376473	-0.485707188
Q8R4G0	1.150118169	-0.664059918	-0.486058251
Q8BH55	1.150204982	-0.66325789	-0.486947092
Q9D0L4	1.15020763	-0.663233303	-0.486974326
Q9JJH1	1.15029002	-0.662464263	-0.487825758
Q62261	1.150302805	-0.662344253	-0.487958552
Q8WTY4	1.150296445	-0.662403978	-0.487892467
Q61239	1.150717187	-0.658349359	-0.492367828
P62843	1.150655988	-0.658952742	-0.491703246
Q9DAK9	1.150663216	-0.658881724	-0.491781492
P14869	1.150475918	-0.660700653	-0.489775264
P23953;D3Z5G7	1.150455828	-0.660893202	-0.489562625
Q5SWD9	1.150513509	-0.660339062	-0.490174448
P01101	1.150542476	-0.660059253	-0.490483224
Q60632;P43135;P43136	1.150569973	-0.659792699	-0.490777274
Q8BV13	1.150559683	-0.659892558	-0.490667125
Q99LJ7	1.152924358	-0.631906464	-0.521017894
P21447	1.152954848	-0.631444135	-0.521510713
Q7TPM6	1.152979627	-0.631065309	-0.521914318
E9Q6R7	1.153032935	-0.630240652	-0.522792283
P97785	1.153047729	-0.63000939	-0.523038338
Q62419	1.153055382	-0.629889333	-0.523166049
Q9CX56	1.153149434	-0.628389643	-0.524759791
Q8R1Q8	1.153117846	-0.628898433	-0.524219414
Q8VCJ6	1.153093943	-0.629279964	-0.523813979
Q9D0L8	1.153103021	-0.629135413	-0.523967608
P58281;P58682	1.153233634	-0.627006695	-0.526226939
P26039	1.153323818	-0.625479205	-0.527844612
Q3HNM7	1.153317007	-0.625596323	-0.527720684
Q3UFY8	1.153274657	-0.626318057	-0.526956599
Q80Z96	1.153301209	-0.625866876	-0.527434333
Q9WU78	1.153289132	-0.626072638	-0.527216494
Q922U1	1.15340196	-0.624113422	-0.529288538
D3YYY8	1.15349667	-0.622399997	-0.531096673
O70589	1.153482502	-0.62266061	-0.530821892
Q920D3	1.152099752	-0.64312909	-0.508970662
Q9CPV3	1.152004849	-0.644293131	-0.507711718
P80315	1.152226498	-0.641539332	-0.510687167
Q9R0E2	1.152306595	-0.640512701	-0.511793894
Q8CC86	1.152314924	-0.640404935	-0.511909989
Q8CGA3	1.15232002	-0.640338889	-0.511981131
O35245	1.152579355	-0.636875348	-0.515704007
P10630	1.152590762	-0.636718077	-0.515872684
Q9Z2D0	1.152532679	-0.637514344	-0.515018335
Q61316	1.15249235	-0.638060718	-0.514431632
Q9QUJ7	1.152486554	-0.638138813	-0.514347741
Q61458	1.152820529	-0.633450783	-0.519369746
Q91YN5	1.152862651	-0.63282974	-0.520032911
P10518	1.152855118	-0.632941348	-0.519913769
Q8BH57	1.152849307	-0.633027275	-0.519822032
Q9CQ60	1.152766157	-0.634241879	-0.518524278
Q4FK66	1.152732924	-0.634719734	-0.51801319
P40142	1.152700052	-0.635188295	-0.517511758
Q8BVE3	1.152711084	-0.635031503	-0.51767958
Q9ERB0	1.152710266	-0.635043144	-0.517667122
Q9DBG3	1.154223831	-0.605843631	-0.5483802
O35099;A2AQW0	1.154250907	-0.605029433	-0.549221474
P33434	1.154254886	-0.604907727	-0.549347159
P19123	1.15429402	-0.603679754	-0.550614266
Q497V5	1.154283013	-0.604030982	-0.550252031
Q8R2G4	1.154315609	-0.602976515	-0.551339094
P46718	1.154331039	-0.602461564	-0.551869474
Q69ZJ7	1.154325799	-0.602637645	-0.551688154
Q8K4L0	1.154484291	-0.596594565	-0.557889726
Q9CYH6	1.154479698	-0.596796706	-0.557682992
Q00558	1.154440949	-0.598423579	-0.55601737
Q9D2M8	1.154461144	-0.597592319	-0.556868825
Q8K245	1.154424617	-0.599072161	-0.555352456
D3Z497;Q9WTZ1	1.154416986	-0.599368519	-0.555048467
P69566	1.154412894	-0.599525792	-0.554887102
P47809	1.154354076	-0.601671948	-0.552682128
O70172	1.154385445	-0.600552585	-0.55383286
Q99L88	1.154387393	-0.600481263	-0.55390613
Q8C0E2	1.154377128	-0.600854678	-0.55352245
Q9Z0H1	1.15437449	-0.600949659	-0.553424831
P98195	1.15377057	-0.617011385	-0.536759185
Q9CQF6	1.153756967	-0.617296862	-0.536460106
Q8BU03	1.153739413	-0.617662176	-0.536077237
Q8BIP0	1.153708854	-0.618290045	-0.535418809
E9PYK3	1.153714715	-0.618170407	-0.535544308
Q8VE88	1.153720493	-0.618052096	-0.535668397
Q922D4	1.153597138	-0.620504774	-0.533092364
Q3URV1	1.153570048	-0.621024242	-0.532545806
Q60930	1.153556126	-0.621288716	-0.53226741
Q80W54	1.153685249	-0.618768266	-0.534916984
Q9JIB4	1.153630323	-0.619859414	-0.53377091
P10810	1.153655072	-0.619371413	-0.534283658
Q3V0C5	1.153660117	-0.619271196	-0.534388921
Q8BLJ3	1.153955969	-0.612883648	-0.54107232
P83510	1.153947778	-0.613076431	-0.540871348
Q9ER60	1.153939708	-0.613265336	-0.540674372
E9PUQ8	1.153834777	-0.615634064	-0.538200712
Q922D8	1.153887674	-0.614459529	-0.539428145
P51667;Q62082	1.154107598	-0.609096569	-0.545011029
Q9CQV5	1.15413292	-0.608417732	-0.545715188
Q14BI1	1.154062556	-0.610268486	-0.543794071
Q8R0A7	1.15406756	-0.610140436	-0.543927124
P49615	1.15404099	-0.610814648	-0.543226343
Q8BFW6	1.154022022	-0.611287516	-0.542734507
O08848	1.154700427	-0.577789744	-0.576910683
P63330	1.154700323	-0.57796154	-0.576738783
Q8C310	1.154700494	-0.577072579	-0.577627915
P80317;Q61390	1.154700538	-0.577350269	-0.577350269
A0A2I3BR81	1.154700538	-0.577350269	-0.577350269
P19246;CON__Q7RTS7;CON__Q32MB2	1.154700538	-0.577350269	-0.577350269
O35655	1.154700507	-0.577584783	-0.577115723
Q91YK2	1.154700511	-0.577569263	-0.577131247
P99024	1.154699984	-0.576370442	-0.578329542
Q9D0T1	1.154699545	-0.576038197	-0.578661348
O55013	1.154698331	-0.57539395	-0.579304381
Q61330	1.15469752	-0.575062119	-0.5796354
Q9R0P3	1.154697256	-0.574964409	-0.579732848
Q04888	1.154658307	-0.568776686	-0.585881621
Q5H8C4	1.154663139	-0.569283221	-0.585379919
Q6P8J2	1.154644403	-0.567461849	-0.587182554
Q8VE62	1.154651112	-0.568073113	-0.586577999
Q9Z140	1.154682219	-0.571708207	-0.582974012
Q80U28	1.154676665	-0.570907939	-0.583768726
Q9JM58	1.154673178	-0.570452628	-0.58422055
Q8VCH7	1.154692598	-0.573637834	-0.581054764
Q8CGZ0	1.154694444	-0.574098207	-0.580596237
P39688;P06240	1.154694174	-0.574026865	-0.580667309
Q8CI43	1.154694202	-0.574034173	-0.580660029
Q8BQ46	1.154690246	-0.57312298	-0.581567266
O70274	1.154686288	-0.572375039	-0.582311249
Q9DCJ1	1.154688055	-0.572694023	-0.581994032
P32233	1.154608791	-0.589910158	-0.564698632
P63328	1.154611491	-0.589724633	-0.564886858
P16388;Q61762	1.154594444	-0.59085277	-0.563741674
Q920E5	1.154601661	-0.590387229	-0.564214432
Q9CR59	1.154570431	-0.592296547	-0.562273883
REV__Q8BQZ4;REV__Q03391;Q61056	1.154559827	-0.59289094	-0.561668887
Q99L45	1.154558884	-0.5929427	-0.561616184
Q80XI4	1.154540954	-0.593895447	-0.560645507
Q9R1P4	1.154542881	-0.593795715	-0.560747166
Q8R059	1.154530767	-0.594412704	-0.560118064
Q9D4F2	1.154521339	-0.594877641	-0.559643698
Q8BWJ3	1.154641869	-0.587401389	-0.56724048
Q8VE99	1.154641216	-0.587457023	-0.567184193
Q921W0	1.154634933	-0.587977158	-0.566657775
Q9DC28;Q9JMK2	1.154632634	-0.588161142	-0.566471492
Q8CGK3	1.154663759	-0.585313323	-0.569350436
Q8VHQ9	1.154666804	-0.584977249	-0.569689555
Q8HWE5	1.154652641	-0.586434465	-0.568218177
Q8BTG7	1.154659101	-0.585801249	-0.568857853
A2ATU0	1.154655803	-0.586130295	-0.568525508
P61600	1.154656306	-0.586080894	-0.568575412
Q05BC3	1.154696471	-0.58000258	-0.574693891
Q9D1X0	1.154694525	-0.58057443	-0.574120095
Q9CW79	1.154676595	-0.583778008	-0.570898588
Q9CZH7	1.154673611	-0.584166113	-0.570507498
Q99J83	1.154689423	-0.581732429	-0.572956994
Q9CZH3	1.154689053	-0.58180472	-0.572884333
P09542	1.154685706	-0.58241145	-0.572274256
Q9Z1B3	1.154681973	-0.583011548	-0.571670426
Q99LD4	1.154518537	-0.559505088	-0.595013449
Q9R1K9;P41209	1.154528739	-0.560014912	-0.594513827
E9Q5K9	1.154499657	-0.558597555	-0.595902101
Q9Z1G3	1.154488083	-0.55806203	-0.596426053
Q3TT38	1.154465841	-0.557071924	-0.597393918
E9PZJ8	1.154473709	-0.557416627	-0.597057082
Q9D0W5	1.154480397	-0.557714334	-0.596766063
O55060	1.15460558	-0.564478365	-0.590127215
Q9Z2C5	1.154601133	-0.564179297	-0.590421836
Q501J7	1.154573891	-0.562476561	-0.592097331
Q9D0F9	1.154554301	-0.561362562	-0.59319174
Q9R1Z7	1.154129451	-0.54561781	-0.608511641
O70443	1.15408704	-0.544450152	-0.609636889
P50247	1.154096092	-0.544695964	-0.609400128
Q8JZU6	1.154068824	-0.543960836	-0.610107989
E9PYR1	1.154076177	-0.544157507	-0.609918671
Q8K1E6	1.15407819	-0.54421154	-0.60986665
Q920L5	1.154219687	-0.548253537	-0.60596615
Q9CY73	1.154230183	-0.548575412	-0.605654771
P46737	1.154170047	-0.546776178	-0.607393869
Q80U35	1.154181839	-0.547120723	-0.607061116
Q9JMD0	1.154180608	-0.547084597	-0.607096011
P39876	1.15418966	-0.547351401	-0.606838259
P60122	1.154192186	-0.547426261	-0.606765925
Q9R1P3	1.154422663	-0.555274214	-0.599148449
Q9Z2W0	1.154427571	-0.555471258	-0.598956313
P35821	1.154398248	-0.554318713	-0.600079536
P28474;Q64437	1.15437905	-0.553593843	-0.600785208
Q9DBL2	1.154388247	-0.553938339	-0.600449908
Q7TQF7	1.154269396	-0.549810337	-0.604459059
P59648	1.154261822	-0.54956761	-0.604694211
P70424;Q61527	1.154260576	-0.549527912	-0.604732664
P00375	1.154283709	-0.550274799	-0.604008911
Q8BSF4	1.15429672	-0.550703843	-0.603592876
P18872	1.15431603	-0.551353405	-0.602962624
Q9CQ33	1.154327294	-0.551739749	-0.602587545
A0A0U1RNF2	1.154365089	-0.553080022	-0.601285067
A2APV2	1.154350463	-0.552552939	-0.601797524
O55222	1.154336459	-0.552058383	-0.602278076
P23492;Q9D8C9	1.154338746	-0.552138484	-0.602200261
Q922Q9	1.153167576	-0.525072567	-0.628095009
D3YUE4	1.15307807	-0.523546366	-0.629531704
O55042	1.153115506	-0.524179592	-0.628935914
P11499;REV__Q8BL66	1.153101815	-0.523947171	-0.629154644
Q8BQP9	1.152651666	-0.516780869	-0.635870797
O88398	1.15258433	-0.515777525	-0.636806805
Q60989	1.152573744	-0.515621202	-0.636952542
Q9CZX0	1.152763741	-0.518486983	-0.634276758
Q9ES70	1.152850546	-0.519841586	-0.63300896
Q80UU1	1.153484162	-0.530854006	-0.622630156
Q6PE01	1.153396931	-0.529194363	-0.624202568
Q8N7N5;A2AHY8	1.153411559	-0.529468811	-0.623942748
Q60766	1.153570789	-0.53256067	-0.621010119
Q8VI75	1.153558688	-0.532318524	-0.621240164
Q3TEW6	1.153655278	-0.534287959	-0.619367319
P51807	1.153621532	-0.53359016	-0.620031372
Q9CPU4	1.153631676	-0.533798774	-0.619832901
Q9ERI6	1.153703379	-0.535301891	-0.618401488
Q8K072	1.153728584	-0.535842762	-0.617885822
Q60854;Q3UWK8	1.153742159	-0.536136897	-0.617605261
Q8CGY8	1.153741427	-0.536121	-0.617620427
P62908	1.153788538	-0.537157539	-0.616630999
Q9QY30	1.153860014	-0.538781589	-0.615078425
Q6ZQK5	1.153836835	-0.538247767	-0.615589068
Q9CXT7	1.153837126	-0.538254428	-0.615582698
O70228	1.153896753	-0.539642715	-0.614254038
P53986	1.153945951	-0.540826653	-0.613119298
Q91V92	1.153923253	-0.54027586	-0.613647392
Q9CQ79	1.153991407	-0.541954671	-0.612036736
Q8CFQ3	1.153968505	-0.541382038	-0.612586467
Q8JZV7	1.15397969	-0.54166059	-0.6123191
Q99LX0	1.15401211	-0.542480153	-0.611531956
Q9D9V7	1.154021541	-0.542722116	-0.611299425
Q8VDD5	1.154035988	-0.543095965	-0.610940023
Q3TC72	1.154047951	-0.54340858	-0.610639371
Q68EF0	1.154055579	-0.543609364	-0.610446214
Q14AT2	1.118153863	-0.309479347	-0.808674516
Q8VDG5	1.117754448	-0.307941484	-0.809812964
Q9DB70	1.117896582	-0.308487865	-0.809408716
D3YZI9	1.116852139	-0.304495024	-0.812357114
P97302	1.116695275	-0.303899713	-0.812795562
Q9JKP7	1.117254973	-0.306029003	-0.81122597
P62309	1.117063656	-0.305299541	-0.811764115
Q8CIN4	1.116980497	-0.304982997	-0.8119975
Q9JIF0	1.12194436	-0.324475586	-0.797468774
Q9Z2G9	1.122146267	-0.325296086	-0.796850181
Q9Z1S8	1.121129599	-0.321187866	-0.799941733
P97411	1.121502545	-0.322688189	-0.798814355
Q80XA6	1.121520229	-0.322759523	-0.798760706
P49442	1.120319418	-0.317954627	-0.80236479
Q8BNL5	1.120604061	-0.31908656	-0.801517501
O89050	1.120687392	-0.319418757	-0.801268636
P50171	1.120651856	-0.319277045	-0.80137481
Q6P2K6	1.120774458	-0.319766239	-0.801008219
Q91X96	1.120868465	-0.320141885	-0.800726581
P05201	1.119041287	-0.312923909	-0.806117377
Q62018	1.119233306	-0.313674373	-0.805558933
Q91Z49	1.120001424	-0.316695127	-0.803306297
D3YXK2	1.119756538	-0.315728781	-0.804027756
Q9WV96	1.119766502	-0.31576804	-0.803998462
Q3UES3	1.122960427	-0.328628523	-0.794331904
Q64332	1.123275257	-0.329927632	-0.793347625
Q9JHU4	1.123343785	-0.330211191	-0.793132593
Q6V4S5	1.123632598	-0.331409399	-0.792223198
Q9EPW0	1.123456244	-0.330677153	-0.792779091
Q8CBY8	1.123974989	-0.332836524	-0.791138466
Q32Q92	1.124424489	-0.334721197	-0.789703292
Q09143	1.124660031	-0.335713908	-0.788946124
Q31125	1.124558823	-0.335286922	-0.789271901
Q3U5Q7	1.128279759	-0.35144623	-0.776833529
Q62048	1.128373642	-0.351867032	-0.77650661
Q8BWA8	1.128548767	-0.352653827	-0.77589494
Q9JJ80	1.128635118	-0.353042672	-0.775592446
P16546;REV__Q6NZJ6	1.128680958	-0.353249336	-0.775431622
P27048;P63163	1.128666463	-0.35318397	-0.775482493
Q61247	1.127616051	-0.348490745	-0.779125306
P00920	1.128052154	-0.350428901	-0.777623253
Q9QZN4	1.127921966	-0.349848797	-0.77807317
O08586	1.125697014	-0.340127437	-0.785569577
P08122	1.125692168	-0.340106647	-0.785585521
Q80ZK0	1.125569422	-0.339580529	-0.785988894
Q9CQV7	1.125527761	-0.339402192	-0.78612557
O70258	1.125113211	-0.337633959	-0.787479252
P47226;A2ALC6	1.125353615	-0.338657989	-0.786695626
P51642	1.125427584	-0.338973842	-0.786453742
Q8R422	1.126151672	-0.342085318	-0.784066354
Q9QXA5	1.126025251	-0.341539489	-0.784485762
Q9Z175	1.126041593	-0.341609982	-0.78443161
Q5HZH2	1.126575405	-0.343922954	-0.782652451
Q9CZ04	1.126628888	-0.344155799	-0.782473089
Q9DC11	1.126926417	-0.345454866	-0.781471551
Q8K194	1.126807663	-0.344935601	-0.781872062
Q8R2R3	1.126835966	-0.345059264	-0.781776702
Q3TAQ9	1.115186682	-0.298230663	-0.816956019
Q9Z1B7;O08911	1.114431315	-0.295429232	-0.819002083
Q1HFZ0	1.11412929	-0.294315822	-0.819813468
Q9Z2Z6	1.112702367	-0.289105824	-0.823596543
P06745;CON__Q3ZBD7	1.112625273	-0.288826653	-0.82379862
Q9ERK4	1.112600935	-0.288738568	-0.823862367
Q5SVL6	1.112418953	-0.288080674	-0.824338279
Q9DB29	1.11221255	-0.287336051	-0.824876499
Q9DBJ3	1.112295306	-0.287634406	-0.8246609
Q9D6J3	1.113804931	-0.293124278	-0.820680653
Q9D2R6	1.113559714	-0.292226324	-0.82133339
Q9R008	1.113642381	-0.292528768	-0.821113614
Q8K0T4	1.113337345	-0.291414139	-0.821923206
P63280	1.113133474	-0.290671265	-0.822462209
Q60780	1.112982177	-0.290121037	-0.82286114
Q80U30	1.111555887	-0.284977958	-0.82657793
O08756	1.111718525	-0.285560463	-0.826158062
O08967;Q80YW0	1.111654775	-0.285332017	-0.826322758
Q8CBE3	1.110966571	-0.282875585	-0.828090986
Q9DBE0	1.110694713	-0.281910087	-0.828784627
Q9WV98	1.110764263	-0.282156834	-0.828607429
Q60668;Q9D3U4	1.107663799	-0.271324057	-0.836339742
Q91Z53	1.107845254	-0.271948923	-0.835896331
P17182	1.108143925	-0.27297984	-0.835164085
P46471	1.108008959	-0.272513609	-0.83549535
P21300	1.108467542	-0.274100266	-0.834367277
P47811	1.108330722	-0.273626133	-0.834704589
O54983	1.109718979	-0.27846694	-0.831252038
P28656	1.109430723	-0.27745627	-0.831974452
P0C7N9	1.108998483	-0.275946242	-0.833052241
Q8BH74	1.108666275	-0.274790084	-0.833876191
P97873	1.101637683	-0.251159348	-0.850478335
Q3UVG3	1.101399826	-0.250385383	-0.851014443
Q9DB50	1.101254242	-0.249912438	-0.851341804
P84086	1.100875017	-0.248683224	-0.852191793
Q8JZY2	1.100865125	-0.248651213	-0.852213912
Q9QUM9	1.100475282	-0.247391782	-0.853083501
Q8R086	1.100677196	-0.248043574	-0.852633623
Q99LS3	1.100592965	-0.247771533	-0.852821431
Q8VBV3	1.098805783	-0.242044164	-0.85676162
Q3B7Z2	1.09920149	-0.243305032	-0.855896458
Q80V31	1.099191328	-0.243272603	-0.855918725
P14231	1.100249839	-0.246665335	-0.853584504
Q6PF93	1.100035893	-0.245977201	-0.854058692
Q61206	1.099605096	-0.244595282	-0.855009814
P28663	1.09989348	-0.24551982	-0.85437366
Q8CHT0	1.099762698	-0.24510027	-0.854662428
P67984	1.102581229	-0.254245205	-0.848336024
P61087	1.102324742	-0.253403875	-0.848920868
E9Q3A7	1.102227162	-0.253084282	-0.84914288
Q05928	1.102140141	-0.252799501	-0.84934064
Q8BG18	1.104119683	-0.259331651	-0.844788033
Q8VDQ9	1.103968511	-0.258828758	-0.845139753
Q9CZR8	1.103880309	-0.258535661	-0.845344649
P17225	1.103106518	-0.255974155	-0.847132363
Q8VDS8	1.103102948	-0.255962378	-0.847140571
Q91W98	1.103262014	-0.256487487	-0.846774526
Q91VE6	1.103345259	-0.256762593	-0.846582666
Q9Z2G0	1.10337852	-0.256872569	-0.846505951
Q9JII6	1.106542794	-0.267487765	-0.839055029
Q99PL6	1.106290753	-0.266630842	-0.83965991
D3Z4S3	1.106373826	-0.266913063	-0.839460763
P97427	1.106393323	-0.266979331	-0.839413993
O88543	1.106870741	-0.268605822	-0.838264919
Q9WU03	1.106943682	-0.268854968	-0.838088714
Q0KL01	1.107061044	-0.26925621	-0.837804833
Q3TCJ1	1.107152497	-0.269569187	-0.83758331
Q02111	1.105520531	-0.264024631	-0.8414959
Q9D7B6	1.10584603	-0.265123748	-0.840722282
P32921	1.105063392	-0.262486572	-0.842576821
Q9ERI5	1.104524835	-0.26068281	-0.843842024
Q9D2U5	1.090102443	-0.215267205	-0.874835238
A6H630	1.090815986	-0.217398293	-0.873417693
P05064;A6ZI46;A6ZI47;Q91Y97	1.090606358	-0.216771098	-0.87383526
Q9ERF3	1.090512433	-0.21649038	-0.874022053
Q3UDP0	1.092443789	-0.222300722	-0.870143067
Q6NVE8	1.092380413	-0.222108775	-0.870271639
O08644	1.092631334	-0.222869264	-0.86976207
Q80TL0	1.092766918	-0.223280771	-0.869486147
A8DUK4;P02088;P02089	1.091244372	-0.21868291	-0.872561462
Q8BHL8	1.091725198	-0.220129472	-0.871595725
O88533	1.092098347	-0.221255547	-0.8708428
Q9Z0N1	1.092034766	-0.22106346	-0.870971306
P06151;P00342	1.093386294	-0.22516584	-0.868220454
Q9CR16	1.094375479	-0.228194426	-0.866181052
A2ALS5	1.09406575	-0.227243723	-0.866822027
P62242	1.093981268	-0.226984793	-0.866996476
O70435	1.095701285	-0.232289204	-0.86341208
Q8BH95	1.095019311	-0.230177762	-0.864841549
Q8BKS9	1.097063152	-0.236539059	-0.860524093
P68368	1.096351938	-0.234314022	-0.862037915
Q62074	1.09646544	-0.234668285	-0.861797154
Q8JZL3	1.096544692	-0.234915834	-0.861628858
Q9Z0M5	1.079670433	-0.185245569	-0.894424863
Q8C4Y3	1.078877077	-0.183042425	-0.895834652
Q91VZ6	1.078916328	-0.183151178	-0.89576515
Q3TLS3	1.081452027	-0.190231885	-0.891220142
Q8R3N6	1.081566145	-0.19055314	-0.891013005
P70318	1.080951656	-0.188825948	-0.892125708
Q8CG03	1.080770523	-0.188318069	-0.892452454
P10639	1.082088465	-0.192026444	-0.89006202
Q06138	1.082252677	-0.192490631	-0.889762046
P48774	1.082604081	-0.193485562	-0.889118519
P40237	1.082426811	-0.192983383	-0.889443428
Q3TD49	1.082509544	-0.193217682	-0.889291861
Q9WTX5	1.082937438	-0.194431431	-0.888506007
O70517	1.082825681	-0.194114109	-0.888711572
Q9D662	1.082748306	-0.193894542	-0.888853764
P49443	1.088828213	-0.211487926	-0.877340287
Q7TN22	1.0886799	-0.211050202	-0.877629698
A0A0A6YVU8;Q9JKV1	1.088603267	-0.210824204	-0.877779062
Q80XU3	1.088640907	-0.210935192	-0.877705714
Q64133	1.086679009	-0.205187841	-0.881491169
Q8VDG3	1.087975899	-0.208978499	-0.8789974
Q9ERE3	1.087528521	-0.207667122	-0.879861399
P51855	1.087606032	-0.207894041	-0.879711991
Q9CPW4	1.087648654	-0.208018871	-0.879629783
P01831	1.085740376	-0.202464729	-0.883275647
Q6P5F9	1.085193349	-0.200885471	-0.884307878
P51432	1.083229602	-0.195262058	-0.887967544
Q8BND3	1.083677208	-0.196537603	-0.887139606
P56391	1.083547911	-0.196168771	-0.88737914
P62627	1.083564127	-0.196215011	-0.887349115
Q5U430	1.084798322	-0.199748537	-0.885049785
Q9CZC8	1.08458091	-0.199124041	-0.885456869
P52480;P53657	1.084350115	-0.198462066	-0.885888049
Q91WU5	1.084062469	-0.197638402	-0.886424067
P28184	1.068442561	-0.154981422	-0.913461139
Q3U0B3	1.06807748	-0.154028382	-0.914049098
Q9ESL4	1.067791393	-0.153282828	-0.914508565
O35945	1.066786574	-0.150673018	-0.916113556
Q6NSW3	1.067237515	-0.15184256	-0.915394955
Q8BMQ2	1.067467986	-0.152441358	-0.915026628
Q811C2	1.065934083	-0.148469449	-0.917464633
O08804	1.065436748	-0.147188348	-0.918248401
Q6P8M1	1.065522201	-0.147408237	-0.918113964
Q80X76	1.063327729	-0.141791314	-0.921536415
Q6S5L9	1.064766989	-0.145468202	-0.919298788
P70196	1.064045624	-0.14362201	-0.920423614
Q9R087	1.064309335	-0.14429615	-0.920013185
P47856	1.064369087	-0.144449021	-0.919920066
Q8BM85	1.064419614	-0.144578327	-0.919841287
P14206	1.076517105	-0.176549841	-0.899967264
O88851	1.076077265	-0.175349662	-0.900727603
Q00612;P97324	1.076261687	-0.175852516	-0.900409171
P17183	1.074879787	-0.172097474	-0.902782313
Q9CRC3	1.074812278	-0.17191479	-0.902897487
E9Q7E2	1.075361296	-0.17340251	-0.901958786
Q91XU3	1.075513566	-0.173815953	-0.901697613
Q99K95	1.071272954	-0.162433191	-0.908839763
Q9CZB9	1.07161583	-0.163343643	-0.908272187
Q9JJI6	1.071459354	-0.162927935	-0.908531419
Q8CGC7	1.073857329	-0.169338093	-0.904519236
P11862	1.072953947	-0.166913216	-0.906040731
P61961	1.073155223	-0.167452428	-0.905702795
Q99J77	1.073090596	-0.16727923	-0.905811367
P21614	1.041216456	-0.088287491	-0.952928964
Q9CY58	1.041144009	-0.08812043	-0.953023579
Q99LC2	1.042245885	-0.090666631	-0.951579254
Q3U1T9	1.042519201	-0.091299966	-0.951219234
Q61655;Q9QY15	1.042449686	-0.091138819	-0.951310868
Q8BG30	1.045822323	-0.099010523	-0.9468118
Q8R349	1.045645118	-0.098594182	-0.947050936
P63141;P16390;B2RQA1;Q61423;P59053	1.045473948	-0.098192314	-0.947281634
Q8R3R8	1.04551785	-0.09829536	-0.947222491
Q9R1P0	1.04691296	-0.101579792	-0.945333168
O55047	1.046975085	-0.101726498	-0.945248587
Q8BMF8	1.0470257	-0.101846054	-0.945179647
P24529	1.046224897	-0.099957514	-0.946267383
P17809	1.0465507	-0.100725087	-0.945825613
Q99M28	1.046421459	-0.100420477	-0.946000982
P39098	1.049332971	-0.107323416	-0.942009555
Q8R3E3	1.048854758	-0.106183704	-0.942671054
P07901	1.047698133	-0.103436808	-0.944261325
O54984	1.048303725	-0.104873346	-0.94343038
Q8BSN5	1.048306715	-0.104880448	-0.943426267
P29533	1.053493282	-0.117339839	-0.936153442
Q9D8C4	1.053312855	-0.116901595	-0.93641126
Q9R060	1.053383953	-0.117074246	-0.936309707
Q8BJL1	1.054353751	-0.119434768	-0.934918983
Q91YP3	1.054002688	-0.118579074	-0.935423614
Q8VD37	1.054131649	-0.11889325	-0.935238399
Q9CQ65	1.054205899	-0.119074223	-0.935131676
A2ABU4	1.052175984	-0.114148344	-0.93802764
Q80UW2	1.051874	-0.113419344	-0.938454656
Q9D920	1.049978216	-0.108864956	-0.94111326
P62880	1.051004139	-0.111324903	-0.939679236
G3X9X1	1.050627229	-0.110419869	-0.940207359
O70585	1.050446679	-0.109986863	-0.940459816
P40124	1.050424748	-0.10993429	-0.940490458
O09131;Q8K2Q2	1.06172645	-0.137731301	-0.923995148
P52760	1.061521995	-0.137215205	-0.92430679
P23591	1.059947971	-0.133259069	-0.926688901
P63276	1.060264968	-0.13405339	-0.926211577
Q66JT5	1.060229444	-0.133964315	-0.926265129
Q8K221	1.060948147	-0.135769409	-0.925178738
Q8R5C5	1.061033374	-0.135983881	-0.925049493
Q60870	1.060502978	-0.134650584	-0.925852394
Q9QUH0	1.060725331	-0.135209114	-0.925516217
Q80W37	1.058896526	-0.130633006	-0.928263521
Q8BQM4	1.058388851	-0.129369739	-0.929019112
Q9CQL1;P61327	1.055765818	-0.122890437	-0.932875381
B1AXP6	1.056481535	-0.124650537	-0.931830998
P35550	1.056639663	-0.125040192	-0.931599471
Q61739	0.982399938	0.034316701	-1.01671664
Q8C650	0.982466741	0.034189629	-1.016656369
Q8VDI7	0.985138934	0.02908747	-1.014226404
Q5M8N0	0.984369062	0.030561261	-1.014930322
Q99LT0	0.984073764	0.031125732	-1.015199496
Q99LC3	0.979747208	0.039344268	-1.019091476
Q6PE15	0.979545404	0.039725269	-1.019270673
Q80WQ2	0.979603381	0.039615832	-1.019219212
Q9Z1N9;Q8K0T7	0.978868162	0.041002383	-1.019870544
Q08093	0.978067051	0.042510107	-1.020577158
Q8R404	0.978350022	0.04197791	-1.020327932
Q9CY18	0.97542645	0.047457244	-1.022883694
Q60772	0.975022436	0.048211132	-1.023233568
Q99JH1	0.974762703	0.048695374	-1.023458077
Q8VCE6	0.976278606	0.045864501	-1.022143107
Q9R0N0	0.977201199	0.044136073	-1.021337272
Q9D0T2	0.993399135	0.013073538	-1.006472673
Q9WUA3	0.993263037	0.013340446	-1.006603483
Q61233	0.991820572	0.016162916	-1.007983488
P16330;F8VQG7;Q3V2Q8;Q8JZS6	0.991216568	0.017341311	-1.008557879
Q9DAR7	0.990710378	0.018327311	-1.009037689
Q8R3S6	0.989653359	0.020381698	-1.010035057
Q9CPV4	0.988832468	0.021972925	-1.010805392
Q9DBR0	0.986346624	0.026769236	-1.01311586
P63085	0.987821176	0.023928184	-1.011749359
Q9D428	0.987321969	0.024891325	-1.012213294
P09528	0.987214291	0.025098896	-1.012313187
Q8R3W5	0.987172543	0.025179357	-1.0123519
Q6NXK7	0.99798584	0.004016223	-1.002002063
Q8BGS0	0.997879081	0.004228428	-1.002107509
Q8K183	0.996076533	0.007801289	-1.003877822
P22366	0.995539619	0.008861861	-1.00440148
Q6P9Z1	0.99535772	0.009220791	-1.004578512
Q8VE10	1.004255026	-0.008565074	-0.995689953
P29391;P49945	1.003484002	-0.007004806	-0.996479197
Q61151	1.002752133	-0.005527178	-0.997224955
Q5SPX1	1.000625543	-0.001252263	-0.999373281
Q91ZM2	1.00052483	-0.001050488	-0.999474342
Q9EPL8	1.000499553	-0.000999855	-0.999499698
O88712	1.002061536	-0.004135901	-0.997925635
P07724	1.001416896	-0.00283984	-0.998577056
Q9CPP6	1.001517074	-0.003041084	-0.99847599
P50114	1.014889016	-0.030474683	-0.984414333
Q63ZW7	1.014842987	-0.030378221	-0.984464766
Q61553	1.015338429	-0.031417279	-0.98392115
Q6P3A8	1.015148407	-0.031018557	-0.98412985
P24288	1.016438806	-0.033731136	-0.98270767
P57774	1.016489668	-0.033838294	-0.982651375
P09411	1.015787858	-0.03236131	-0.983426547
Q8CI33	1.015615126	-0.031998319	-0.983616807
Q3UEZ8	1.020036786	-0.04135677	-0.978680016
Q8BJW5	1.020122777	-0.041540161	-0.978582616
Q8R2Z5	1.020169514	-0.04163986	-0.978529654
Q6NS46	1.019201872	-0.03957896	-0.979622912
Q8C4J7	1.019643836	-0.040519418	-0.979124417
Q9D880	1.019691835	-0.040621641	-0.979070194
Q9CZS1	1.018528455	-0.038148702	-0.980379754
Q9JL62	1.01851846	-0.038127496	-0.980390963
Q80VD1	1.017816791	-0.036640745	-0.981176047
Q9Z1Z2	1.017210756	-0.03535945	-0.981851306
Q8CHY3	1.006155526	-0.012426875	-0.993728651
Q62425	1.007152418	-0.014461697	-0.992690721
Q9Z266	1.008062595	-0.016325082	-0.991737513
P62259	1.012524814	-0.025538863	-0.986985951
Q8C561	1.008990163	-0.01822958	-0.990760583
Q99JZ7	1.009101052	-0.018457633	-0.990643419
P12658	1.010926828	-0.022224124	-0.988702704
P15508	1.010615081	-0.021579448	-0.989035634
Q9D753	1.010650242	-0.021652126	-0.988998116
Q8CCB4	1.010194861	-0.020711472	-0.989483389
P61971	1.009952454	-0.020211304	-0.98974115
Q9JKB3	1.009789246	-0.019874768	-0.989914477
B2RR83	1.035086173	-0.074319148	-0.960767026
P28271	1.033060862	-0.069776648	-0.963284213
Q9WU63	1.033235316	-0.070166557	-0.963068759
Q7TSZ8	1.033874251	-0.071596777	-0.962277473
Q810U3	1.033712631	-0.071234673	-0.962477958
Q9Z2W8;P23818	1.033583747	-0.070946072	-0.962637675
Q923B0	1.036485958	-0.077479274	-0.959006684
P68037	1.037106392	-0.078885425	-0.958220967
Q9R1Q8	1.036877359	-0.078365951	-0.958511408
Q05909	1.038156491	-0.081273124	-0.956883367
Q61598	1.03790902	-0.080709544	-0.957199475
P34152	1.038471004	-0.081990169	-0.956480834
Q99J45	1.039026009	-0.083257673	-0.955768336
P99029	1.025275259	-0.052628954	-0.972646306
Q64735	1.022949306	-0.04759855	-0.975350755
Q9Z1Q5	1.023503267	-0.048792892	-0.974710375
Q61503	1.027087289	-0.056576715	-0.970510575
P50396	1.028750205	-0.060222307	-0.968527898
Q99JI6	1.028827015	-0.060391229	-0.968435786
Q9CZT8	1.028427695	-0.059513554	-0.968914141
Q78T81	1.028532297	-0.059743339	-0.968788959
Q8VDW4	1.028613684	-0.059922184	-0.9686915
Q61337	1.029960211	-0.062888884	-0.967071327
Q60648	1.030357335	-0.063766636	-0.966590699
Q922H4	1.030252498	-0.063534793	-0.966717705
Q7TMC8	1.032103053	-0.067640482	-0.964462572
Q3UBZ5	1.031264677	-0.065776946	-0.965487731
Q9CQE5	1.031005349	-0.065201689	-0.96580366
Q9CZ30	1.03096716	-0.065117023	-0.965850138
Q99NB9	0.966350395	0.064205096	-1.030555491
Q9QXL8	0.965755542	0.065289333	-1.031044876
Q8VEJ4	0.965325954	0.066071341	-1.031397295
Q6P6M7	0.965523703	0.065711469	-1.031235172
Q91WK1	0.96551992	0.065718356	-1.031238276
Q62009	0.962792532	0.070666144	-1.033458676
Q9D7E3	0.962876759	0.070513848	-1.033390606
Q9Z223	0.962304139	0.071548625	-1.033852764
P70280	0.96264246	0.070937424	-1.033579884
Q8VCN6	0.962521699	0.071155646	-1.033677345
Q9CPT5	0.960285013	0.075185792	-1.035470806
P68254	0.960850221	0.074169461	-1.035019683
Q80TB8	0.961216054	0.073510889	-1.034726943
Q76LS9	0.949464849	0.094378615	-1.043843464
Q8CHT1	0.952196355	0.089579802	-1.041776157
P62500	0.955715412	0.083351737	-1.039067149
P63001;Q05144	0.955212891	0.084244291	-1.039457182
P61982	0.95357151	0.087152213	-1.040723723
Q8R2K1	0.954592076	0.085345479	-1.039937555
P53569	0.95917799	0.077172343	-1.036350333
Q9Z0S1	0.958574607	0.078252867	-1.036827474
Q80X95	0.958799392	0.077850512	-1.036649904
P99026	0.958775389	0.077893486	-1.036668876
Q9EP64	0.958752028	0.07793531	-1.036687338
Q8VC85	0.956744338	0.081520861	-1.038265198
Q9D2P4	0.957672574	0.079865271	-1.037537845
P15626;O35660	0.945111966	0.101963407	-1.047075373
P62322	0.945827195	0.10072234	-1.046549534
Q6PIE5	0.947062259	0.098574462	-1.045636721
P60335	0.946307392	0.09988796	-1.046195352
Q922X9	0.946703298	0.099199353	-1.04590265
Q9Z1B8	0.946657609	0.099278852	-1.045936461
Q8CD92	0.94280726	0.105948821	-1.048756081
Q8VDT9	0.942497688	0.106482565	-1.048980253
Q9CWM4	0.943895443	0.104069678	-1.047965121
Q9D1G5	0.943234842	0.105210998	-1.04844584
P51880	0.940175499	0.110474498	-1.050649997
Q00915	0.941771489	0.107733169	-1.049504658
Q9R0P9	0.941026189	0.109014544	-1.050040733
Q99KE3	0.936541322	0.116680417	-1.053221739
Q99LD9	0.936712146	0.116389826	-1.053101972
G3XA59	0.938110404	0.114007103	-1.052117508
Q9DBR3	0.939049121	0.112403323	-1.051452444
Q6P4T2	0.933229702	0.122292393	-1.055522095
Q8BL48	0.933596696	0.121672473	-1.055269169
Q9D892	0.929584949	0.128422383	-1.058007332
Q8CHP8	0.929143724	0.129161205	-1.058304929
Q9CQ75	0.929347387	0.128820262	-1.058167649
Q924M7	0.931294643	0.125552911	-1.056847555
P12961	0.930611742	0.126700328	-1.05731207
Q9DCZ1	0.930700779	0.126550823	-1.057251602
P51141;Q60838	0.92482505	0.136356186	-1.061181237
Q9ET26	0.925145453	0.135824649	-1.060970102
Q9JKN1	0.926192249	0.134085538	-1.060277787
Q3TMH2	0.926795969	0.133080786	-1.059876755
Q9R001	0.926941615	0.132838199	-1.059779814
P47955	0.923550996	0.13846626	-1.062017256
Q8BVU5	0.922697987	0.139875856	-1.062573842
P84309	0.920396028	0.143667339	-1.064063366
P31938	0.921527025	0.141806779	-1.063333804
Q9JHW9	0.920989111	0.142692226	-1.063681337
Q91WU4	0.914574451	0.153175861	-1.067750312
P09041	0.917216872	0.148873997	-1.06609087
Q9D4H4	0.917612619	0.148227718	-1.065840337
Q9Z2W9	0.910444912	0.159852781	-1.070297693
Q9EPB4	0.912372866	0.156742449	-1.069115315
P35700	0.911825588	0.157626587	-1.069452176
Q5XJY5	0.911542002	0.158084343	-1.069626345
Q9QZF2	0.909315707	0.161668933	-1.070984641
Q8R1K4	0.909447105	0.16145781	-1.070904915
Q99KR6	0.909467786	0.161424576	-1.070892363
Q60739	0.908769882	0.162545344	-1.071315226
Q9D6M3;Q9DB41	0.908412515	0.163118638	-1.071531153
Q6P073	0.906624682	0.165980615	-1.072605296
Q9QZB9	0.906804992	0.165692432	-1.072497424
Q99K51	0.907416683	0.164714024	-1.072130707
Q9R0M5	0.907894194	0.163949414	-1.071843609
P11627	0.88631233	0.197810168	-1.084122498
P83940	0.884476005	0.200627961	-1.085103966
Q9CR02	0.883455568	0.202189675	-1.085645243
Q14AI6	0.888044976	0.195142663	-1.083187639
P0DN34	0.889187938	0.193378294	-1.082566232
Q9R0B6	0.889650002	0.192663945	-1.082313947
O35640	0.891149529	0.190341415	-1.081490944
Q8BR90	0.891292491	0.190119649	-1.081412139
Q91YN9	0.891270019	0.190154511	-1.08142453
Q80X90	0.890500128	0.191348037	-1.081848165
Q9Z2L6	0.89034223	0.191592606	-1.081934835
P45591	0.89316759	0.187205399	-1.080372989
Q6NXM2	0.892165508	0.188764101	-1.080929609
P70349	0.892633148	0.188037071	-1.080670219
Q8BG94	0.892602308	0.188085037	-1.080687345
O55033	0.894495407	0.185135468	-1.079630875
Q6P9J9	0.89544937	0.183645111	-1.079094481
Q03734;D3Z451	0.896230787	0.182422299	-1.078653086
Q9CZP5	0.896544392	0.181931037	-1.078475429
Q9D2C2	0.897771424	0.180006054	-1.077777477
Q8C163	0.89713303	0.181008139	-1.078141169
Q922K7	0.896941688	0.181308249	-1.078249937
Q9D898	0.90385412	0.170395844	-1.074249964
P35979	0.90540748	0.167923339	-1.073330819
Q62351	0.904959632	0.168636959	-1.073596591
Q8R5H1	0.904647016	0.169134723	-1.073781739
P63017	0.900416488	0.175840965	-1.076257452
P60521	0.902099563	0.173179571	-1.075279134
Q5U5V2	0.90139817	0.174289718	-1.075687888
