# Supplementary material for: Investigation of the Hydrogen Sulfide Signaling Pathway in Schwann Cells during Peripheral Nerve Degeneration: Multi-Omics Approaches
Source: Antioxidants (Basel). 2022 Aug 19;11(8):1606. doi: 10.3390/antiox11081606 (PMC9405209; doi:10.3390/antiox11081606)
Supplement: Supplementary file 1 [file antioxidants-11-01606-s001.zip › Proteomics clustering-Cluster 2.txt]

GeneID	Control	X1DAY	X1DAY.NEM
Q9CQ91	0.685404538	-1.147478924	0.462074385
Q6P4S6;Q60670	0.686343751	-1.14734797	0.46100422
Q9CR29	0.686070063	-1.147386262	0.461316199
P27600	0.682206068	-1.147915379	0.465709311
Q8VIH9	0.683024141	-1.147805142	0.464781001
Q8BWF0	0.684417344	-1.147615199	0.463197856
Q8JZP2	0.684536037	-1.147598889	0.463062852
D3YXF5	0.683749723	-1.147706567	0.463956844
Q9D0D4	0.68369519	-1.147714002	0.464018811
Q5RJ54	0.684056273	-1.147664693	0.46360842
Q8BHD4	0.68397782	-1.147675422	0.463697603
Q9DCD5	0.687813769	-1.147140452	0.459326683
Q9JIM1	0.690171795	-1.14680104	0.456629245
Q9CZ69	0.68904525	-1.146964201	0.45791895
Q9DBC3	0.689229429	-1.146937652	0.457708223
Q8BLY2	0.692202368	-1.146502278	0.454299909
O89103	0.69157128	-1.146595776	0.455024496
P61164	0.691701814	-1.146576484	0.45487467
Q9CWE0	0.693128815	-1.146363966	0.453235151
P62267	0.693605526	-1.146292307	0.452686781
O35454	0.694059909	-1.146223693	0.452163784
P25911	0.694005241	-1.146231964	0.452226723
Q61510	0.697932078	-1.145626639	0.44769456
Q8BUY5	0.698146244	-1.145592969	0.447446725
P62484	0.695529395	-1.145999716	0.450470321
Q60597	0.697062185	-1.145762698	0.448700513
Q9R233	0.696339503	-1.14587488	0.449535378
P17427	0.704042566	-1.144639129	0.440596563
Q8C0L0	0.703218303	-1.144775599	0.441557297
F6XJP7	0.700946007	-1.145146535	0.444200528
P14094	0.70067749	-1.145189858	0.444512368
Q9R1C6	0.701834154	-1.145002472	0.443168318
Q8BGV0	0.702480621	-1.144896869	0.442416247
Q9D1R9	0.702530128	-1.144888756	0.442358628
Q69ZR2	0.707467785	-1.14406104	0.436593255
Q922P9	0.707344283	-1.144082193	0.43673791
P37040	0.709609377	-1.143690548	0.434081171
Q9QXE7	0.709863054	-1.143646199	0.433783145
Q9D710	0.709346031	-1.143736483	0.434390453
Q9D517	0.708945522	-1.143806141	0.434860619
O88545	0.709104182	-1.143778576	0.434674394
P20444;P63318	0.709051477	-1.143787737	0.434736259
Q8BZ98	0.711019632	-1.143442752	0.432423121
Q99KV1	0.710766116	-1.143487522	0.432721407
P70208	0.711702583	-1.143321656	0.431619072
Q8BFZ9	0.711968938	-1.143274234	0.431305296
Q6F3F9	0.712757663	-1.143133168	0.430375504
Q9DCD6	0.712318855	-1.143211768	0.430892912
Q9QZD5	0.716035907	-1.142536554	0.426500647
P28867;REV__Q6ZPL9	0.715913304	-1.142559167	0.426645862
P70279	0.715942706	-1.142553746	0.42661104
O35459	0.714806061	-1.142762325	0.427956264
Q3U3R4	0.714560101	-1.142807196	0.428247095
Q9EQY5	0.713494688	-1.143000482	0.429505794
P61793	0.713784304	-1.142948114	0.429163811
Q8BHF7	0.713826934	-1.142940395	0.429113461
P49722	0.719152946	-1.141953799	0.422800852
Q8K2J7	0.717901237	-1.142189637	0.4242884
Q8R1T1	0.717362747	-1.142290343	0.424927596
Q3UMB9	0.721955302	-1.141416891	0.419461589
Q8R1I1	0.722305292	-1.141348967	0.419043674
P53995	0.721289666	-1.141545539	0.420255873
P97366	0.720653452	-1.14166785	0.421014398
Q80YN3	0.720286134	-1.141738176	0.421452042
Q9DCT8	0.725833201	-1.14065346	0.414820259
P46735	0.724423082	-1.140933827	0.416510745
Q8JZR0	0.724018646	-1.141013656	0.41699501
Q9WVL0	0.724213751	-1.140975178	0.416761427
Q8K0L9	0.728083481	-1.140199478	0.412115997
Q80ZW2	0.7318519	-1.139421003	0.407569103
Q9QYH6	0.731025389	-1.139593705	0.408568316
P55821	0.733441004	-1.139085843	0.405644839
Q9DBR1	0.733979984	-1.138971233	0.404991249
P60867	0.735685978	-1.138605343	0.402919365
Q8CGC4	0.734564745	-1.138846353	0.404281609
Q0P5W1	0.739368173	-1.137799331	0.398431158
P97872;Q8C116	0.736854935	-1.138351882	0.401496947
P54818	0.736526521	-1.138423317	0.401896796
Q9CQL4	0.736611339	-1.138404885	0.401793546
Q5MPP0	0.75172014	-1.134930306	0.383210166
Q9D0K0	0.751789822	-1.134913388	0.383123566
Q3UGF1	0.750598931	-1.135201389	0.384602458
P56387	0.750952602	-1.135116112	0.38416351
Q05793	0.751190306	-1.135058676	0.38386837
Q8C5W0	0.751241899	-1.135046197	0.383804298
Q8K0U4	0.750061622	-1.135330536	0.385268914
P62918	0.749667172	-1.135425032	0.38575786
Q8BGR2	0.749713384	-1.135413975	0.385700592
B2RQE8	0.749597456	-1.135441706	0.38584425
Q8BYI6	0.749544443	-1.13545438	0.385909937
O88630	0.748769015	-1.13563921	0.386870194
Q9Z2W1	0.748602811	-1.135678693	0.387075882
Q9D8V7	0.749358554	-1.135498781	0.386140228
Q91V12	0.749195938	-1.135537576	0.386341638
P97298	0.749069075	-1.135567809	0.386498734
Q8R0Y8	0.749090828	-1.135562627	0.386471799
P97346	0.741781161	-1.137258985	0.395477825
J3QN89	0.743759787	-1.136808671	0.393048884
Q8VBZ3	0.743479721	-1.136872809	0.393393088
Q80U56	0.743351374	-1.136902157	0.393550783
Q8BHS6	0.743343929	-1.136903859	0.39355993
Q6DFV5	0.747133431	-1.136025716	0.388892285
Q9Z1P8	0.747773609	-1.135874975	0.388101366
O08912;Q8CF93	0.745583358	-1.136387837	0.390804479
Q8R100	0.745897748	-1.136314718	0.39041697
Q61586	0.744850157	-1.136557713	0.391707556
Q9QZD8	0.745200142	-1.136476737	0.391276595
E9PV38;Q6PDB7;Q08ED5;Q8BK48;Q91WG0	0.766637212	-1.13111573	0.364478518
O35379	0.767377878	-1.130916076	0.363538197
O35381;Q64G17	0.762945871	-1.132096142	0.369150271
Q3V3Q7	0.762797279	-1.1321351	0.369337822
P97496	0.764620742	-1.131654311	0.36703357
Q3V009	0.764347661	-1.13172669	0.367379029
O70161;P70181	0.764219499	-1.131760614	0.367541115
P97770	0.764271416	-1.131746875	0.36747546
P23780	0.761433445	-1.132490845	0.3710574
Q6PEE2	0.760643289	-1.132695448	0.372052159
Q99MK8;Q3UYH7	0.760528718	-1.132725024	0.372196306
Q9CSB4	0.759546783	-1.132977556	0.373430773
Q9QX60	0.758628462	-1.133212197	0.374583735
O35326	0.754256929	-1.134309	0.380052071
Q8CHS8	0.7544083	-1.134271576	0.379863276
P62717	0.752751228	-1.13467911	0.381927882
Q6PB93	0.753292024	-1.134546629	0.381254605
P20029	0.753727001	-1.134439705	0.380712705
Q9JJQ0	0.753656562	-1.134457042	0.380800481
O88848	0.757380624	-1.133528667	0.376148043
Q99M51	0.757410293	-1.133521174	0.376110881
Q9WV92	0.755592712	-1.133977379	0.378384667
Q8R2Y0	0.756053574	-1.133862249	0.377808675
Q99PP7	0.756048512	-1.133863515	0.377815004
P0CW02;P0CW03	0.7564631	-1.133759633	0.377296533
Q8C0D5	0.756226211	-1.133819026	0.377592815
Q6P2B1;Q8K368	0.756374492	-1.13378186	0.377407368
Q9DB25	0.756301137	-1.133800251	0.377499115
Q9JM52	0.780248029	-1.127287334	0.347039305
Q9ERA0	0.777470153	-1.128096369	0.350626216
O70475	0.777102623	-1.128202334	0.351099711
Q8VEG6	0.776878178	-1.128266922	0.351388744
Q9D1Q4	0.776944541	-1.128247835	0.351303294
Q6VVW5	0.778651618	-1.127754034	0.349102416
Q8VCH8	0.778686401	-1.127743916	0.349057515
Q9CXS4	0.777858275	-1.127984195	0.35012592
Q9D7N3	0.778155476	-1.127898109	0.349742633
Q812E0	0.775687107	-1.128608114	0.352921006
P62307	0.775260275	-1.128729746	0.353469471
Q91YD9	0.775163111	-1.128757387	0.353594276
Q3UHA3	0.775204787	-1.128745533	0.353540746
Q9QYF1	0.775216245	-1.128742274	0.353526028
Q9CXF4	0.7738012	-1.129142998	0.355341798
Q9R1J0	0.774478883	-1.128951545	0.354472662
Q921Y2	0.770478075	-1.130069657	0.359591583
Q9D142	0.770538962	-1.13005286	0.359513898
Q6NZQ2	0.769315902	-1.13038899	0.361073088
Q9ERS5	0.769281653	-1.130398363	0.36111671
Q5SQX6	0.769458909	-1.130349827	0.360890918
Q91VA7	0.769483283	-1.130343149	0.360859866
Q4LDD4	0.769425318	-1.13035903	0.360933711
Q9D4H1	0.76939886	-1.130366276	0.360967416
P14069	0.770015132	-1.130197154	0.360182022
Q91VE0	0.770039182	-1.13019054	0.360151358
Q07813	0.769737227	-1.130273504	0.360536278
Q9JIY5;A2RT60	0.769626171	-1.130303976	0.360677804
Q6ZWV7	0.771759485	-1.129714719	0.357955234
Q9D832	0.771710249	-1.129728413	0.358018164
P61957	0.772536635	-1.129498	0.356961365
P28704	0.773143872	-1.129327895	0.356184023
O88741	0.772754444	-1.129437063	0.356682619
Q99N87	0.772929872	-1.12938792	0.356458047
P14211	0.794492569	-1.122908856	0.328416287
G5E8K5	0.794724091	-1.122834453	0.328110362
O35226	0.794694523	-1.122843961	0.328149439
Q99J27	0.792959247	-1.123398962	0.330439715
Q9QWR8	0.793354417	-1.123273091	0.329918674
Q80VQ0;J3QMK6	0.790068999	-1.124310327	0.334241328
Q8BGB7	0.790497736	-1.12417616	0.333678425
Q9R0A1	0.790581023	-1.124150055	0.333569033
P05213	0.7922035	-1.123638836	0.331435336
Q3UMB5	0.792073351	-1.123680032	0.331606681
P86046	0.791337313	-1.123912395	0.332575082
Q921T2	0.790968781	-1.124028343	0.333059562
Q61072	0.786921303	-1.125284501	0.338363198
Q61147	0.787470906	-1.125115777	0.337644871
Q9QY36	0.787696443	-1.125046372	0.337349929
Q6DFV3	0.788966606	-1.124653674	0.335687068
Q8C6B2	0.789247032	-1.124566556	0.335319524
P01901;P06339;Q0WXH6;Q85ZW9;Q85ZW7;Q85ZW6;Q85ZW5;Q85ZW8;O19443;Q6W9L1;A7VMS3;A7VMS2;Q31615;F6T1I5;P14432	0.788025453	-1.124944949	0.336919496
P62754	0.788297623	-1.124860891	0.336563268
Q9D8P4	0.788410598	-1.124825958	0.33641536
P54761	0.783684141	-1.12626659	0.34258245
Q8K097	0.782978458	-1.126478039	0.343499581
Q9D8B3	0.782651059	-1.12657582	0.343924761
A2AG50	0.784473179	-1.126029049	0.34155587
P47740;P47739	0.784677898	-1.125967225	0.341289327
Q9WU56	0.784727586	-1.125952208	0.341224622
Q8VCH6	0.785810952	-1.125623608	0.339812656
Q9R059	0.784962901	-1.125881023	0.340918122
Q8CGP4;C0HKE9;C0HKE8;C0HKE7;C0HKE6;C0HKE5;C0HKE4;C0HKE3;C0HKE2;C0HKE1;Q8CGP6;Q8R1M2;Q8CGP7;Q8CGP5;Q8BFU2	0.785402646	-1.125747715	0.340345069
P07759;P29621	0.785205252	-1.1258076	0.340602348
Q6IRU7	0.817769457	-1.114887445	0.297117988
P26516	0.818200409	-1.114728342	0.296527933
Q69Z98	0.818135611	-1.11475229	0.296616679
P61148	0.816696285	-1.115281933	0.298585648
Q9EP75	0.816386385	-1.115395393	0.299009009
Q3TC33	0.815524572	-1.115709851	0.300185279
Q8R0L9	0.815886264	-1.115578068	0.299691804
Q9D1C8	0.811844715	-1.11703495	0.305190235
Q9D8V0	0.812310474	-1.116868801	0.304558328
P25444	0.814198508	-1.116190639	0.301992131
Q9CRB8	0.814082748	-1.116232434	0.302149686
Q3UN02	0.814705455	-1.116007274	0.301301819
Q9CX13	0.814515938	-1.116075886	0.301559948
P59481	0.813164332	-1.11656303	0.303398697
O70579	0.813057255	-1.116601458	0.303544203
Q60680	0.813012626	-1.116617468	0.303604842
Q00898	0.813688336	-1.116374625	0.302686288
Q8C145	0.813401285	-1.116477905	0.30307662
Q8QZS3	0.8133763	-1.116486886	0.303110586
Q78IK4	0.808615259	-1.118174579	0.30955932
O54991	0.808105794	-1.118352392	0.310246598
Q8BQ47	0.807914056	-1.118419174	0.310505119
G3X9K3	0.809954231	-1.117704699	0.307750468
P43024	0.809770969	-1.117769229	0.30799826
Q62141	0.809040461	-1.118025766	0.308985305
Q9Z1M8	0.809366679	-1.117911343	0.308544664
A6H611	0.807388117	-1.118601969	0.311213852
Q8C6B0;Q5I0W6	0.807090709	-1.118705085	0.311614377
Q9CRA7	0.80672145	-1.11883286	0.31211141
P48455	0.806171018	-1.119022809	0.312851791
Q3UHN9	0.806109087	-1.119044142	0.312935055
Q8C0L9	0.804167114	-1.119709114	0.315542
O35075	0.805687143	-1.119189278	0.313502134
O70572	0.805710885	-1.119181121	0.313470236
Q80TL7	0.805395168	-1.119289495	0.313894328
Q9CQ19	0.805300305	-1.119322019	0.314021714
O08529	0.795854399	-1.122469698	0.326615299
Q8JZN5	0.796529772	-1.12225055	0.325720778
Q8BMS9	0.798561487	-1.121585848	0.32302436
Q9D9E0	0.798274278	-1.121680309	0.323406031
Q9DB73	0.797752989	-1.12185134	0.324098351
Q9DBP5	0.797150026	-1.122048493	0.324898467
Q9WUM3	0.797395403	-1.121968348	0.324572945
Q7TMX5	0.802999365	-1.120105287	0.317105922
P04370	0.802078796	-1.120415658	0.318336863
Q4VAA7	0.802208317	-1.120372093	0.318163776
P56546	0.800597946	-1.120911349	0.320313403
P62996	0.799657382	-1.121223904	0.321566522
Q9D8Y1	0.799711918	-1.12120583	0.321493912
Q8R480	0.79899423	-1.121443211	0.322448981
Q9DA75	0.799041991	-1.121427445	0.322385455
O35704	0.799323293	-1.121334498	0.322011205
Q99JW4	0.799208675	-1.121372389	0.322163715
Q61411	0.834692721	-1.10833554	0.273642818
Q566J8	0.834274942	-1.10850495	0.274230008
Q9QXJ1	0.83431158	-1.108490109	0.27417853
Q64338	0.831153953	-1.109758026	0.278604073
Q9D1N9	0.83104049	-1.109803169	0.278762678
P62897;CON__P62894;P00015	0.830799083	-1.109899119	0.279100036
Q8BGH4	0.830461174	-1.110033206	0.279572032
Q8K215	0.830508482	-1.110014449	0.279505967
O70551	0.833165349	-1.10895297	0.27578762
O70333	0.83231504	-1.109294415	0.276979376
P39654	0.831819631	-1.109492598	0.277672967
Q80ZM5	0.828272782	-1.110895423	0.282622642
E9PY16	0.827403444	-1.111234987	0.283831543
Q61160	0.827838098	-1.11106542	0.283227322
P22315	0.826782492	-1.111476508	0.284694017
Q3UGY8	0.826769992	-1.111481361	0.284711369
Q8C0J2	0.825645213	-1.111916654	0.286271441
Q8CJH3	0.82606347	-1.111755112	0.285691642
Q8BKC5	0.819650766	-1.114189966	0.294539201
Q9D5T0	0.819585877	-1.114214149	0.294628272
Q9D8T7	0.820712418	-1.113793019	0.293080601
Q60953	0.821233799	-1.113597188	0.292363389
Q9WTL8	0.821325198	-1.113562798	0.2922376
Q62422	0.822795261	-1.113007187	0.290211926
P40936	0.822630821	-1.113069569	0.290438748
P62264	0.822508379	-1.113115981	0.290607602
A2TJV2	0.822306379	-1.113192479	0.2908861
C0HK80;C0HK79	0.821931636	-1.113334161	0.291402525
O88455	0.824742997	-1.112263806	0.287520809
P62700	0.825025053	-1.112155469	0.287130416
P97930	0.823733752	-1.11265003	0.288916279
Q9JJW0	0.82354118	-1.112723472	0.289182292
Q9CWF2	0.823951632	-1.112566839	0.288615207
P59999	0.824342615	-1.112417293	0.288074677
Q9CR64	0.824299786	-1.112433691	0.288133904
P84078;P61205	0.851931315	-1.100991417	0.249060102
O89053	0.852247798	-1.100849968	0.248602171
P61082	0.852100093	-1.100916014	0.24881592
P62301	0.852445419	-1.100761519	0.2483161
Q80WC7	0.852366615	-1.100796801	0.248430185
Q8BFY9	0.852827786	-1.100590113	0.247762327
Q6TCG5	0.852676834	-1.100657824	0.24798099
Q922F4	0.852688708	-1.1006525	0.247963792
B2RPU2	0.850030463	-1.101835857	0.251805394
O08914	0.850157515	-1.101779688	0.251622173
Q9D300	0.850248054	-1.101739638	0.251491584
E9Q7L1	0.850795986	-1.101496834	0.250700848
Q8K288	0.851064691	-1.101377497	0.250312806
Q00899;Q3TTC2	0.856088999	-1.099113587	0.243024588
Q5SWT3	0.855889089	-1.099204852	0.243315764
Q9Z2A0	0.855940067	-1.099181588	0.243241521
Q5PR69	0.85708106	-1.098659208	0.241578148
Q8C7R4	0.856723546	-1.098823237	0.242099691
Q9CRB0	0.856524954	-1.098914214	0.242389259
A2A6A1	0.854647301	-1.099769554	0.245122253
P47962	0.854834777	-1.099684544	0.244849767
Q9JKB1;P58321	0.854741684	-1.099726767	0.244985083
P53994	0.854776252	-1.099711091	0.244934839
Q9DBY1	0.854797677	-1.099701374	0.244903697
Q9CYW4	0.854005299	-1.100060011	0.246054712
Q8JZP9	0.853713413	-1.100191732	0.246478319
G3X972	0.853628509	-1.100230008	0.246601499
Q8K442	0.853587954	-1.100248284	0.24666033
P62855	0.844689967	-1.104161781	0.259471814
Q00262	0.844240157	-1.104354582	0.260114425
Q8BXN9	0.844055437	-1.10443362	0.260378183
Q9DCK3	0.844130346	-1.104401578	0.260271232
P54726	0.847635319	-1.102887446	0.255252127
Q6ZWY3;Q6ZWU9	0.847748778	-1.102837943	0.255089165
Q61543	0.845829502	-1.103671198	0.257841695
Q91Y86	0.846342338	-1.10344941	0.257107072
Q9EPK2	0.846818976	-1.103242715	0.256423738
P70398;F8VPU6	0.842476465	-1.105105949	0.262629484
Q6P5G6	0.842638931	-1.105037042	0.26239811
Q8BZJ7	0.842890305	-1.104930302	0.262039997
Q9R1V7	0.843116381	-1.104834179	0.261717798
P15331	0.840982228	-1.105736814	0.264754586
P54276	0.840923516	-1.105761496	0.26483798
Q8BK64	0.841073913	-1.105698255	0.264624342
Q8CIG8	0.841204142	-1.105643452	0.26443931
Q3THK3	0.841608691	-1.105472958	0.263864267
Q02384	0.842112949	-1.105259906	0.263146957
Q62470	0.841874523	-1.105360717	0.263486194
Q8BIV3	0.839164909	-1.106497072	0.267332163
Q9CR62	0.839325811	-1.106430069	0.267104259
O54998	0.838162935	-1.106912966	0.268750032
P09602	0.837646893	-1.107126259	0.269479366
Q9DB60	0.837883959	-1.10702835	0.269144392
Q8BQS4	0.836618496	-1.107549496	0.270931
Q62186	0.836933653	-1.107420051	0.270486398
P53798	0.8371902	-1.107314511	0.27012431
Q3V038	0.837183564	-1.107317243	0.270133679
P70333	0.472308151	-1.148674628	0.676366477
Q9D6J1	0.472444237	-1.148689834	0.676245597
Q9JJ04	0.466100104	-1.147961534	0.68186143
Q9D1H6	0.466760438	-1.148039183	0.681278745
Q8BWZ3	0.466927343	-1.148058742	0.681131398
Q9DB32	0.467002189	-1.148067504	0.681065315
Q9CQJ0	0.463319865	-1.147629925	0.68431006
Q3U821	0.464328814	-1.147751139	0.683422325
Q8K0F1	0.464106452	-1.14772451	0.683618059
Q6ZWQ7	0.491485099	-1.150635802	0.659150703
E9PY46	0.489684727	-1.150467369	0.660782643
P59017	0.490066674	-1.150503376	0.660436701
Q61810	0.488423918	-1.150347466	0.661923548
Q9CQ69	0.487693516	-1.150277271	0.662583756
P97927	0.484722426	-1.149986206	0.66526378
P51830	0.486321282	-1.150143942	0.66382266
O70492	0.485639346	-1.150076979	0.664437633
Q9DCM0	0.485416182	-1.150054964	0.664638782
P05132	0.482731326	-1.149786188	0.667054862
Q8K2A7	0.482597677	-1.14977262	0.667174943
Q8CHP5	0.481436839	-1.149654021	0.668217182
Q9CQX5	0.48091403	-1.149600168	0.668686138
Q9Z2C9	0.480973258	-1.149606282	0.668633024
P63089	0.475920351	-1.149072059	0.673151708
Q9WUP7	0.475966556	-1.149077059	0.673110503
Q8C6E0	0.477333738	-1.149224048	0.67189031
Q9WUU8	0.477086531	-1.149197608	0.672111077
P58059	0.478647838	-1.14936358	0.670715742
Q99KN9	0.477995981	-1.14929458	0.671298599
P16460	0.480011805	-1.14950659	0.669494785
Q9R069	0.479368435	-1.149439365	0.670070929
Q9WVL2	0.479312023	-1.14943345	0.670121427
Q9QXJ4	0.525561229	-1.153195712	0.627634483
Q8BPU7	0.524389853	-1.153127843	0.62873799
Q9JJE4	0.524830242	-1.15315353	0.628323288
Q922V4	0.529429877	-1.153409489	0.623979612
P58854	0.528506132	-1.153359894	0.624853762
O35409	0.528698355	-1.153370289	0.624671935
Q4VAA2	0.528874807	-1.153379797	0.62450499
P61021	0.526776711	-1.153264596	0.626487885
Q9Z1R3	0.527864301	-1.153324898	0.625460598
B1AVD1	0.536576706	-1.153762282	0.617185576
P81269	0.537683478	-1.153811997	0.61612852
Q02053;P31254	0.530786003	-1.153480646	0.622694643
Q3UQ44	0.530867813	-1.153484876	0.622617063
Q78IS1	0.532186399	-1.153552059	0.62136566
Q91WC3	0.531573986	-1.153521088	0.621947102
Q9QY24	0.534703072	-1.153675105	0.618972033
P07214	0.532943463	-1.15358979	0.620646327
Q4VA53	0.533809439	-1.153632193	0.619822754
P70206	0.503912383	-1.151708509	0.647796126
Q704Y3	0.503358722	-1.151664082	0.64830536
Q8K2A8	0.497901513	-1.151209346	0.653307833
Q9CPW3	0.498534907	-1.15126369	0.652728783
Q8BHT6	0.515786497	-1.152584937	0.636798439
O08919	0.518265826	-1.152749386	0.63448356
Q9DCT1	0.518006425	-1.152732482	0.634726058
P59326	0.511357456	-1.152275161	0.640917705
Q9JHJ3	0.512483949	-1.152355891	0.639871942
Q91UZ5	0.507025323	-1.151952415	0.644927093
Q5Y5T1	0.509953289	-1.152172683	0.642219394
A0A0B4J1F9	0.509176958	-1.152115147	0.642938189
P58022	0.509293178	-1.1521238	0.642830622
Q3UUQ7	0.565838651	-1.154624531	0.58878588
Q9D0S9	0.564667847	-1.154608345	0.589940498
Q9DC40	0.563911378	-1.154597063	0.590685685
A0A338P7C9	0.562378415	-1.154572221	0.592193807
Q62245	0.561823582	-1.154562578	0.592738996
Q9D394	0.56020937	-1.154532553	0.594323183
Q9EPK7	0.558765017	-1.15450321	0.595738192
Q8BHY8	0.544922315	-1.154104369	0.609182054
Q9Z0R9	0.54476203	-1.154098514	0.609336484
E9Q555	0.554303334	-1.154397847	0.600094513
Q4VAE3	0.555178461	-1.154420262	0.599241801
Q99M04	0.555611018	-1.154431026	0.598820009
P28653	0.55227182	-1.154342536	0.602070715
Q8BGQ1	0.551479398	-1.154319721	0.602840323
Q8BYA0	0.548264393	-1.154220042	0.60595565
A2AHC3	0.54947036	-1.154258768	0.604788409
O70566	0.549192062	-1.154249974	0.605057912
Q9JJF6	0.608329374	-1.154136174	0.545806801
Q8CCK0	0.607417262	-1.154169213	0.546751951
Q8BH64	0.606759222	-1.154192419	0.547433197
Q8BHK3	0.606680235	-1.154195169	0.547514934
P97821	0.603423968	-1.154301942	0.550877974
Q9WUQ5	0.606128245	-1.154214176	0.54808593
Q8BSL7	0.605930276	-1.154220902	0.548290626
Q8C5Q4	0.605835964	-1.154224089	0.548388125
Q9QYJ3	0.605071202	-1.154249538	0.549178336
Q91YQ3	0.604551868	-1.154266415	0.549714547
Q9CZ28	0.604585682	-1.154265326	0.549679643
P13707	0.600650011	-1.154382775	0.553732764
Q9CQI7	0.600866815	-1.154376791	0.553509977
Q9D0F6	0.598878056	-1.154429557	0.555551501
Q9JIQ3	0.599644317	-1.15440979	0.554765473
G3X9I7	0.595416664	-1.154510087	0.559093423
P97493	0.596588322	-1.154484432	0.55789611
Q8CJ91	0.596628623	-1.154483521	0.557854898
Q5ND34	0.59765114	-1.154459742	0.556808602
Q6NWV3	0.597201875	-1.154470344	0.557268468
Q8BQZ5	0.592885428	-1.154559927	0.561674499
P0CG14	0.592785925	-1.154561731	0.561775806
Q6ZQI3	0.592814403	-1.154561216	0.561746813
B9EJI9	0.592373465	-1.154569082	0.562195617
Q6NVF0	0.592664343	-1.154563919	0.561899576
Q9R118	0.592530102	-1.154566314	0.562036212
P46096;Q9R0N5	0.590478421	-1.154600267	0.564121847
O89017	0.591400268	-1.154585628	0.563185361
Q8VDP3	0.591381718	-1.154585933	0.563204215
P35601	0.585703138	-1.15466006	0.568956922
P50429	0.585833367	-1.154658785	0.568825418
Q8BY89	0.587049133	-1.154645921	0.567596787
Q8VHY0	0.58674438	-1.154649308	0.567904929
Q9CQ92	0.583209543	-1.15468065	0.571471107
Q9EPR2	0.582999712	-1.154682051	0.571682339
Q91WV0	0.584335592	-1.154672252	0.57033666
Q9ESN9	0.584840471	-1.154668006	0.569827535
Q8K009	0.568479639	-1.154655338	0.586175699
Q3LAC4	0.571601546	-1.154681521	0.583079975
P58021	0.571671495	-1.15468198	0.583010485
Q8BG67	0.571706994	-1.154682211	0.582975217
Q6DFX2	0.56987231	-1.154668391	0.584796081
Q99KU0	0.570569953	-1.154674099	0.584104146
Q91WD0	0.57097447	-1.154677154	0.583702685
Q9Z108;Q8CJ67	0.570796357	-1.154675832	0.583879475
Q8BHN3	0.579770005	-1.154697153	0.574927148
Q91VM3	0.578847777	-1.154699243	0.575851465
P51791	0.578678051	-1.15469952	0.576021469
Q9JJI8	0.57867127	-1.15469953	0.57602826
P84099	0.578103162	-1.154700211	0.576597049
Q64455	0.578435547	-1.154699858	0.576264311
O89001	0.574733364	-1.154696591	0.579963227
P59266	0.574244837	-1.154694981	0.580450144
Q9D0I4	0.576840848	-1.154700389	0.577859541
P14824	0.577350269	-1.154700538	0.577350269
E9Q616	0.577350269	-1.154700538	0.577350269
P20152;CON__Q9NSB2;CON__Q6ISB0;CON__O43790;CON__Q6NT21;CON__P78385;CON__Q14533;CON__P78386;Q99M73	0.577350269	-1.154700538	0.577350269
Q9CR98	0.576260826	-1.154699854	0.578439027
O54774	0.575816546	-1.154699181	0.578882636
P28652	0.575708962	-1.154698985	0.578990023
Q3TRM4	0.575713508	-1.154698993	0.578985485
Q68FL6	0.638849494	-1.152433446	0.513583952
Q6PDL0	0.638753435	-1.152440663	0.513687228
P84084	0.637401137	-1.152540987	0.515139849
Q8CDM8	0.637402924	-1.152540856	0.515137931
Q922B6	0.636741265	-1.152589082	0.515847817
Q9CQM9	0.636917494	-1.152576292	0.515658799
Q64695	0.63557334	-1.152672828	0.517099489
O35955	0.63612117	-1.152633765	0.516512595
Q3U1V6	0.636323828	-1.152619216	0.516295389
Q9CXD6	0.636475544	-1.15260829	0.516132746
Q76KJ5	0.630604121	-1.153009546	0.522405425
Q9ES34	0.630975301	-1.152985488	0.522010187
Q9EPL4	0.629605615	-1.153073395	0.523467779
Q9Z1Q9	0.63007208	-1.153043725	0.522971645
Q6QI06	0.632676504	-1.152872968	0.520196464
E9PW37	0.631817916	-1.152930219	0.521112303
Q9CZJ2	0.631832165	-1.152929276	0.521097112
Q6PHZ2	0.631902137	-1.152924644	0.521022507
Q08481	0.631877974	-1.152926245	0.521048271
Q9D937	0.631865352	-1.15292708	0.521061729
P08228	0.632343645	-1.152895275	0.52055163
Q9WVG6	0.632098998	-1.15291158	0.520812582
Q9CZ62	0.634397756	-1.152755349	0.518357593
Q8BW56	0.633451475	-1.152820482	0.519369007
Q9ESD7	0.633869534	-1.152791848	0.518922314
Q9CQY5	0.622784993	-1.153475711	0.530690718
P62331	0.62558809	-1.153317487	0.527729397
Q9DBZ5	0.625912642	-1.153298527	0.527385886
P62830	0.624134555	-1.153400768	0.529266213
Q60848	0.624268477	-1.153393207	0.52912473
Q9CRG1	0.624597881	-1.153374511	0.52877663
Q9Z2C4	0.624741263	-1.153366331	0.528625068
Q9JI19	0.612662525	-1.153965307	0.541302782
P39429	0.611346693	-1.154019629	0.542672936
Q8BJH1	0.611679929	-1.154006073	0.542326144
Q9D7J6	0.616692835	-1.153785629	0.537092794
A2A484	0.616031905	-1.153816472	0.537784567
Q5XKN4	0.615906889	-1.153822245	0.537915356
Q8BIA4	0.615095444	-1.153859246	0.538763803
Q4FZF3	0.6135498	-1.153927473	0.540377674
Q9D6S7	0.614152677	-1.153901212	0.539748535
Q9D6K7	0.642370124	-1.152160674	0.509790551
B2RRE7	0.643547431	-1.15206585	0.508518419
P62270;F6YVP7;A0A1Y7VKY1	0.64354849	-1.152065764	0.508517274
Q8BW72	0.646760224	-1.151797826	0.505037603
Q61545	0.645514116	-1.151903393	0.506389277
O35646	0.645730623	-1.151885198	0.506154574
Q9CQA1	0.645755929	-1.151883067	0.506127138
F8VPK0	0.649214798	-1.151583886	0.502369087
Q71FD7	0.651321895	-1.151393859	0.500071964
A2A9C3	0.650386346	-1.151478959	0.501092613
P70257	0.650220867	-1.151493891	0.501273024
Q80V53	0.655250333	-1.151023764	0.495773432
Q8BVG4	0.65683671	-1.150868446	0.494031736
Q64362	0.65258491	-1.151277122	0.498692213
P27546	0.65433583	-1.151111764	0.496775934
Q91VU0	0.65343819	-1.15119705	0.49775886
Q9D4H8	0.653821668	-1.151160747	0.49733908
O08832	0.672330941	-1.149171208	0.476840267
Q9CXZ1	0.67202494	-1.149207932	0.477182993
Q8BUH1	0.673959527	-1.148973555	0.475014028
Q9CQ62	0.675299761	-1.148808111	0.47350835
Q9D1A2	0.674989938	-1.148846581	0.473856643
Q62000	0.680436111	-1.148150617	0.467714506
Q8BH24	0.679637322	-1.148255321	0.468617998
Q6PAJ1	0.678081209	-1.148456694	0.470375485
Q8CBX0	0.676705816	-1.148631829	0.471926013
Q8R2Q8	0.677278419	-1.148559241	0.471280821
O70433	0.659387177	-1.150611619	0.491224442
P41105	0.659194928	-1.150631285	0.491436357
Q810J8	0.658237031	-1.150728525	0.492491494
P97393	0.658931304	-1.15065817	0.491726866
Q9QUN7	0.658627837	-1.150689003	0.492061166
Q60710	0.661695048	-1.150371622	0.488676575
Q8R088	0.66121113	-1.150422545	0.489211415
Q9CX83	0.659941262	-1.15055466	0.490613398
Q9WUP4	0.660438415	-1.150503198	0.490064783
Q99M01	0.667564765	-1.149728437	0.482163672
P52019	0.668041038	-1.14967417	0.481633132
Q91YH5	0.668016386	-1.149676987	0.481660601
E9Q401	0.670134882	-1.149431874	0.479296993
O35737	0.669330873	-1.149525631	0.480194758
Q3TYU2	0.668558322	-1.149614876	0.481056554
P09925	0.663217689	-1.15020931	0.486991621
Q8CD91	0.663664141	-1.150161119	0.486496978
Q9Z2D3	0.666118006	-1.149891361	0.483773355
Q9JK48	0.665263828	-1.1499862	0.484722373
Q9JIS8	0.66441139	-1.150079847	0.485668457
Q8CGF1	0.664869395	-1.150029656	0.48516026
O35425	0.664653007	-1.150053405	0.485400397
Q3UHU5	0.664653926	-1.150053304	0.485399378
Q99LJ7	1.152924358	-0.631906464	-0.521017894
P21447	1.152954848	-0.631444135	-0.521510713
Q7TPM6	1.152979627	-0.631065309	-0.521914318
E9Q6R7	1.153032935	-0.630240652	-0.522792283
P97785	1.153047729	-0.63000939	-0.523038338
Q62419	1.153055382	-0.629889333	-0.523166049
Q9CX56	1.153149434	-0.628389643	-0.524759791
Q8R1Q8	1.153117846	-0.628898433	-0.524219414
Q8VCJ6	1.153093943	-0.629279964	-0.523813979
Q9D0L8	1.153103021	-0.629135413	-0.523967608
P58281;P58682	1.153233634	-0.627006695	-0.526226939
P26039	1.153323818	-0.625479205	-0.527844612
Q3HNM7	1.153317007	-0.625596323	-0.527720684
Q3UFY8	1.153274657	-0.626318057	-0.526956599
Q80Z96	1.153301209	-0.625866876	-0.527434333
Q9WU78	1.153289132	-0.626072638	-0.527216494
Q922U1	1.15340196	-0.624113422	-0.529288538
D3YYY8	1.15349667	-0.622399997	-0.531096673
O70589	1.153482502	-0.62266061	-0.530821892
Q920D3	1.152099752	-0.64312909	-0.508970662
Q9CPV3	1.152004849	-0.644293131	-0.507711718
P80315	1.152226498	-0.641539332	-0.510687167
Q9R0E2	1.152306595	-0.640512701	-0.511793894
Q8CC86	1.152314924	-0.640404935	-0.511909989
Q8CGA3	1.15232002	-0.640338889	-0.511981131
O35245	1.152579355	-0.636875348	-0.515704007
P10630	1.152590762	-0.636718077	-0.515872684
Q9Z2D0	1.152532679	-0.637514344	-0.515018335
Q61316	1.15249235	-0.638060718	-0.514431632
Q9QUJ7	1.152486554	-0.638138813	-0.514347741
Q61458	1.152820529	-0.633450783	-0.519369746
Q91YN5	1.152862651	-0.63282974	-0.520032911
P10518	1.152855118	-0.632941348	-0.519913769
Q8BH57	1.152849307	-0.633027275	-0.519822032
Q9CQ60	1.152766157	-0.634241879	-0.518524278
Q4FK66	1.152732924	-0.634719734	-0.51801319
P40142	1.152700052	-0.635188295	-0.517511758
Q8BVE3	1.152711084	-0.635031503	-0.51767958
Q9ERB0	1.152710266	-0.635043144	-0.517667122
Q9DBG3	1.154223831	-0.605843631	-0.5483802
O35099;A2AQW0	1.154250907	-0.605029433	-0.549221474
P33434	1.154254886	-0.604907727	-0.549347159
P19123	1.15429402	-0.603679754	-0.550614266
Q497V5	1.154283013	-0.604030982	-0.550252031
Q8R2G4	1.154315609	-0.602976515	-0.551339094
P46718	1.154331039	-0.602461564	-0.551869474
Q69ZJ7	1.154325799	-0.602637645	-0.551688154
Q8K4L0	1.154484291	-0.596594565	-0.557889726
Q9CYH6	1.154479698	-0.596796706	-0.557682992
Q00558	1.154440949	-0.598423579	-0.55601737
Q9D2M8	1.154461144	-0.597592319	-0.556868825
Q8K245	1.154424617	-0.599072161	-0.555352456
D3Z497;Q9WTZ1	1.154416986	-0.599368519	-0.555048467
P69566	1.154412894	-0.599525792	-0.554887102
P47809	1.154354076	-0.601671948	-0.552682128
O70172	1.154385445	-0.600552585	-0.55383286
Q99L88	1.154387393	-0.600481263	-0.55390613
Q8C0E2	1.154377128	-0.600854678	-0.55352245
Q9Z0H1	1.15437449	-0.600949659	-0.553424831
P98195	1.15377057	-0.617011385	-0.536759185
Q9CQF6	1.153756967	-0.617296862	-0.536460106
Q8BU03	1.153739413	-0.617662176	-0.536077237
Q8BIP0	1.153708854	-0.618290045	-0.535418809
E9PYK3	1.153714715	-0.618170407	-0.535544308
Q8VE88	1.153720493	-0.618052096	-0.535668397
Q922D4	1.153597138	-0.620504774	-0.533092364
Q3URV1	1.153570048	-0.621024242	-0.532545806
Q60930	1.153556126	-0.621288716	-0.53226741
Q80W54	1.153685249	-0.618768266	-0.534916984
Q9JIB4	1.153630323	-0.619859414	-0.53377091
P10810	1.153655072	-0.619371413	-0.534283658
Q3V0C5	1.153660117	-0.619271196	-0.534388921
Q8BLJ3	1.153955969	-0.612883648	-0.54107232
P83510	1.153947778	-0.613076431	-0.540871348
Q9ER60	1.153939708	-0.613265336	-0.540674372
E9PUQ8	1.153834777	-0.615634064	-0.538200712
Q922D8	1.153887674	-0.614459529	-0.539428145
P51667;Q62082	1.154107598	-0.609096569	-0.545011029
Q9CQV5	1.15413292	-0.608417732	-0.545715188
Q14BI1	1.154062556	-0.610268486	-0.543794071
Q8R0A7	1.15406756	-0.610140436	-0.543927124
P49615	1.15404099	-0.610814648	-0.543226343
Q8BFW6	1.154022022	-0.611287516	-0.542734507
Q3TEW6	1.153655278	-0.534287959	-0.619367319
P51807	1.153621532	-0.53359016	-0.620031372
Q9CPU4	1.153631676	-0.533798774	-0.619832901
Q9ERI6	1.153703379	-0.535301891	-0.618401488
Q8K072	1.153728584	-0.535842762	-0.617885822
Q60854;Q3UWK8	1.153742159	-0.536136897	-0.617605261
Q8CGY8	1.153741427	-0.536121	-0.617620427
O70228	1.153896753	-0.539642715	-0.614254038
P53986	1.153945951	-0.540826653	-0.613119298
Q91V92	1.153923253	-0.54027586	-0.613647392
P62908	1.153788538	-0.537157539	-0.616630999
Q9QY30	1.153860014	-0.538781589	-0.615078425
Q6ZQK5	1.153836835	-0.538247767	-0.615589068
Q9CXT7	1.153837126	-0.538254428	-0.615582698
Q9R1P3	1.154422663	-0.555274214	-0.599148449
Q9Z2W0	1.154427571	-0.555471258	-0.598956313
P35821	1.154398248	-0.554318713	-0.600079536
P28474;Q64437	1.15437905	-0.553593843	-0.600785208
Q9DBL2	1.154388247	-0.553938339	-0.600449908
Q7TQF7	1.154269396	-0.549810337	-0.604459059
P59648	1.154261822	-0.54956761	-0.604694211
P70424;Q61527	1.154260576	-0.549527912	-0.604732664
P00375	1.154283709	-0.550274799	-0.604008911
Q8BSF4	1.15429672	-0.550703843	-0.603592876
P18872	1.15431603	-0.551353405	-0.602962624
Q9CQ33	1.154327294	-0.551739749	-0.602587545
A0A0U1RNF2	1.154365089	-0.553080022	-0.601285067
A2APV2	1.154350463	-0.552552939	-0.601797524
O55222	1.154336459	-0.552058383	-0.602278076
P23492;Q9D8C9	1.154338746	-0.552138484	-0.602200261
Q920L5	1.154219687	-0.548253537	-0.60596615
Q9CY73	1.154230183	-0.548575412	-0.605654771
P46737	1.154170047	-0.546776178	-0.607393869
Q80U35	1.154181839	-0.547120723	-0.607061116
Q9JMD0	1.154180608	-0.547084597	-0.607096011
P39876	1.15418966	-0.547351401	-0.606838259
P60122	1.154192186	-0.547426261	-0.606765925
Q9R1Z7	1.154129451	-0.54561781	-0.608511641
O70443	1.15408704	-0.544450152	-0.609636889
P50247	1.154096092	-0.544695964	-0.609400128
Q8JZU6	1.154068824	-0.543960836	-0.610107989
E9PYR1	1.154076177	-0.544157507	-0.609918671
Q8K1E6	1.15407819	-0.54421154	-0.60986665
Q9CQ79	1.153991407	-0.541954671	-0.612036736
Q8CFQ3	1.153968505	-0.541382038	-0.612586467
Q8JZV7	1.15397969	-0.54166059	-0.6123191
Q99LX0	1.15401211	-0.542480153	-0.611531956
Q9D9V7	1.154021541	-0.542722116	-0.611299425
Q8VDD5	1.154035988	-0.543095965	-0.610940023
Q3TC72	1.154047951	-0.54340858	-0.610639371
Q68EF0	1.154055579	-0.543609364	-0.610446214
P32233	1.154608791	-0.589910158	-0.564698632
P63328	1.154611491	-0.589724633	-0.564886858
P16388;Q61762	1.154594444	-0.59085277	-0.563741674
Q920E5	1.154601661	-0.590387229	-0.564214432
Q9CR59	1.154570431	-0.592296547	-0.562273883
REV__Q8BQZ4;REV__Q03391;Q61056	1.154559827	-0.59289094	-0.561668887
Q99L45	1.154558884	-0.5929427	-0.561616184
Q80XI4	1.154540954	-0.593895447	-0.560645507
Q9R1P4	1.154542881	-0.593795715	-0.560747166
Q8R059	1.154530767	-0.594412704	-0.560118064
Q9D4F2	1.154521339	-0.594877641	-0.559643698
Q8BWJ3	1.154641869	-0.587401389	-0.56724048
Q8VE99	1.154641216	-0.587457023	-0.567184193
Q921W0	1.154634933	-0.587977158	-0.566657775
Q9DC28;Q9JMK2	1.154632634	-0.588161142	-0.566471492
Q8CGK3	1.154663759	-0.585313323	-0.569350436
Q8VHQ9	1.154666804	-0.584977249	-0.569689555
Q8HWE5	1.154652641	-0.586434465	-0.568218177
Q8BTG7	1.154659101	-0.585801249	-0.568857853
A2ATU0	1.154655803	-0.586130295	-0.568525508
P61600	1.154656306	-0.586080894	-0.568575412
Q05BC3	1.154696471	-0.58000258	-0.574693891
Q9D1X0	1.154694525	-0.58057443	-0.574120095
Q9CW79	1.154676595	-0.583778008	-0.570898588
Q9CZH7	1.154673611	-0.584166113	-0.570507498
Q99J83	1.154689423	-0.581732429	-0.572956994
Q9CZH3	1.154689053	-0.58180472	-0.572884333
P09542	1.154685706	-0.58241145	-0.572274256
Q9Z1B3	1.154681973	-0.583011548	-0.571670426
Q99LD4	1.154518537	-0.559505088	-0.595013449
Q9R1K9;P41209	1.154528739	-0.560014912	-0.594513827
E9Q5K9	1.154499657	-0.558597555	-0.595902101
Q9Z1G3	1.154488083	-0.55806203	-0.596426053
Q3TT38	1.154465841	-0.557071924	-0.597393918
E9PZJ8	1.154473709	-0.557416627	-0.597057082
Q9D0W5	1.154480397	-0.557714334	-0.596766063
O55060	1.15460558	-0.564478365	-0.590127215
Q9Z2C5	1.154601133	-0.564179297	-0.590421836
Q501J7	1.154573891	-0.562476561	-0.592097331
Q9D0F9	1.154554301	-0.561362562	-0.59319174
O08848	1.154700427	-0.577789744	-0.576910683
P63330	1.154700323	-0.57796154	-0.576738783
Q8C310	1.154700494	-0.577072579	-0.577627915
P80317;Q61390	1.154700538	-0.577350269	-0.577350269
A0A2I3BR81	1.154700538	-0.577350269	-0.577350269
P19246;CON__Q7RTS7;CON__Q32MB2	1.154700538	-0.577350269	-0.577350269
O35655	1.154700507	-0.577584783	-0.577115723
Q91YK2	1.154700511	-0.577569263	-0.577131247
P99024	1.154699984	-0.576370442	-0.578329542
Q9D0T1	1.154699545	-0.576038197	-0.578661348
O55013	1.154698331	-0.57539395	-0.579304381
Q61330	1.15469752	-0.575062119	-0.5796354
Q9R0P3	1.154697256	-0.574964409	-0.579732848
Q04888	1.154658307	-0.568776686	-0.585881621
Q5H8C4	1.154663139	-0.569283221	-0.585379919
Q6P8J2	1.154644403	-0.567461849	-0.587182554
Q8VE62	1.154651112	-0.568073113	-0.586577999
Q9Z140	1.154682219	-0.571708207	-0.582974012
Q80U28	1.154676665	-0.570907939	-0.583768726
Q9JM58	1.154673178	-0.570452628	-0.58422055
Q8VCH7	1.154692598	-0.573637834	-0.581054764
Q8CGZ0	1.154694444	-0.574098207	-0.580596237
P39688;P06240	1.154694174	-0.574026865	-0.580667309
Q8CI43	1.154694202	-0.574034173	-0.580660029
Q8BQ46	1.154690246	-0.57312298	-0.581567266
O70274	1.154686288	-0.572375039	-0.582311249
Q9DCJ1	1.154688055	-0.572694023	-0.581994032
P08249	1.141766295	-0.720138956	-0.421627339
P62046	1.141541261	-0.721311863	-0.420229397
Q99MR6	1.141557621	-0.72122697	-0.420330651
A2AWR3	1.141217357	-0.722980619	-0.418236738
P21279	1.141130065	-0.723426511	-0.417703553
P52840	1.141329388	-0.722405992	-0.418923396
P41731	1.141468669	-0.721687833	-0.419780836
Q8CG72	1.141399816	-0.722043374	-0.419356442
Q8K4Q0	1.1398221	-0.729924126	-0.409897974
B2RQC6	1.139765938	-0.730195804	-0.409570134
Q9Z2H5	1.139763237	-0.730208853	-0.409554385
Q9ET38	1.140061238	-0.728760833	-0.411300405
G5E8P1	1.139904297	-0.72952547	-0.410378828
P70303	1.139928032	-0.729410123	-0.410517909
Q9D0I9	1.140855035	-0.72482098	-0.416034056
Q8BFY6	1.140848273	-0.724855073	-0.4159932
Q8BJD1	1.140844292	-0.724875137	-0.415969154
Q3UPR9	1.140614321	-0.726028799	-0.414585522
P29387	1.140480533	-0.726695101	-0.413785432
Q8VE09	1.14050552	-0.726570926	-0.413934595
Q8VEH5	1.140240401	-0.727882269	-0.412358132
Q922B2	1.14040992	-0.72704536	-0.41336456
Q9D1L9	1.140345243	-0.727365322	-0.412979922
Q80WS3	1.136019283	-0.747160812	-0.388858471
Q9WVQ5	1.135950009	-0.747455316	-0.388494694
P50518;Q9D593	1.13568192	-0.748589219	-0.387092701
P58064	1.135832036	-0.747955429	-0.387876607
Q8BHL5	1.136790593	-0.743838624	-0.392951968
Q3V0K9	1.137234778	-0.74188826	-0.395346518
Q9D020	1.137269393	-0.741735089	-0.395534303
P63073	1.13709433	-0.742507976	-0.394586354
Q8R3G9	1.137148524	-0.742269182	-0.394879343
Q8K2I1	1.138862392	-0.734489787	-0.404372606
Q9JHS3	1.138907478	-0.734278851	-0.404628627
Q9CPS6	1.1389967	-0.733860416	-0.405136284
Q61026	1.139065909	-0.73353491	-0.405530998
Q9CQF4	1.139037875	-0.733666859	-0.405371016
Q8K0E1	1.139214616	-0.732832749	-0.406381866
Q9EST4	1.139262013	-0.732608152	-0.406653861
D3Z7X0	1.139534171	-0.731310903	-0.408223268
Q99KN2	1.139444144	-0.731741461	-0.407702683
Q9ER39	1.139429549	-0.731811125	-0.407618425
Q923X4	1.137822174	-0.739265204	-0.39855697
Q8C167	1.137766456	-0.739516223	-0.398250233
Q91XV3	1.137734189	-0.739661376	-0.398072813
Q9CQ49	1.138053181	-0.738219434	-0.399833747
Q01065	1.138092822	-0.73803915	-0.400053672
Q8QZY6	1.138084361	-0.738077654	-0.400006707
Q9CYR6	1.138082057	-0.738088135	-0.399993921
Q8BVU0	1.137892164	-0.73894922	-0.398942945
P09055	1.137941427	-0.738726365	-0.399215063
Q80W47	1.13793287	-0.738765101	-0.39916777
Q8CE08	1.138192251	-0.737585885	-0.400606366
Q91V81	1.138258254	-0.737284145	-0.400974109
P24549	1.138633664	-0.735554719	-0.403078945
G5E897	1.138533058	-0.736020409	-0.40251265
Q8C878;Q9DBK7	1.138468563	-0.736318086	-0.402150477
P43883	1.127033145	-0.78111073	-0.345922415
O55102	1.127335768	-0.78008311	-0.347252658
Q9CZN8	1.127568099	-0.779289586	-0.348278514
Q8BGN2	1.127841405	-0.778350933	-0.349490473
Q922Y2	1.127965244	-0.777923751	-0.350041492
Q91YJ2	1.128224598	-0.777025292	-0.351199306
Q9D820	1.128371195	-0.77651514	-0.351856055
P51163	1.128465218	-0.776187059	-0.352278159
P97494	1.128432109	-0.776302669	-0.35212944
Q61391;Q9JLI3	1.128424556	-0.77632903	-0.352095526
Q9DB27	1.129254122	-0.773406479	-0.355847643
Q9WVK4	1.129245345	-0.773437693	-0.355807652
Q3U2P1	1.129008393	-0.774277969	-0.354730424
P23242	1.128928151	-0.774561486	-0.354366665
Q9CPZ8	1.128858732	-0.774806345	-0.354052387
P24788	1.130315781	-0.769583124	-0.360732657
Q9Z130	1.130393153	-0.769300692	-0.361092461
E9Q6P5	1.130705225	-0.768156138	-0.362549087
Q9D6K8	1.130571277	-0.768648468	-0.36192281
P24369	1.12992528	-0.771000612	-0.358924669
Q63959	1.130054726	-0.770532196	-0.35952253
Q9D0B5	1.130032257	-0.770613607	-0.359418651
Q7TSJ2	1.129612978	-0.772124819	-0.357488159
Q8BPA8	1.129580725	-0.772240451	-0.357340274
Q9D4C9;Q8BG92	1.129670841	-0.771917152	-0.357753689
Q924C1	1.129759493	-0.771598436	-0.358161057
Q9JHQ5	1.129727992	-0.771711762	-0.35801623
Q8C0L6	1.130966644	-0.767190627	-0.363776017
Q9D0M0	1.131047617	-0.766890304	-0.364157313
Q8K2Z2	1.13129666	-0.765962835	-0.365333825
P97370	1.131531984	-0.765081137	-0.366450847
Q80VI1	1.131590144	-0.76486242	-0.366727724
Q99L85	1.131575611	-0.764917106	-0.366658505
Q9DCA5	1.132036388	-0.763173494	-0.368862895
P02463;Q63ZW6	1.132585113	-0.76106992	-0.371515193
O55240	1.132672774	-0.760731065	-0.371941709
Q9JI90	1.132689377	-0.760666795	-0.372022582
Q8BH61	1.133837001	-0.756154442	-0.377682559
O08788	1.133878608	-0.755988179	-0.377890429
Q9D1M4	1.133887198	-0.755953829	-0.377933369
A2ASZ8;Q8BVN7	1.133602871	-0.757086482	-0.376516389
Q6PGK3	1.133706429	-0.756674973	-0.377031456
Q8BJ64	1.133768964	-0.756425908	-0.377343056
P70459	1.133419125	-0.757813762	-0.375605363
G5E895	1.133004946	-0.759439884	-0.373565062
Q91W82;P52483	1.133197165	-0.758687465	-0.3745097
Q9WV72	1.134204842	-0.754677824	-0.379527018
Q08460	1.134078691	-0.755185943	-0.378892748
Q60991	1.134089936	-0.755140722	-0.378949214
O88520	1.134349965	-0.754091054	-0.380258911
Q91WG7	1.13452212	-0.753391844	-0.381130277
P32883	1.134436689	-0.753739251	-0.380697438
Q6PAV2	1.134454024	-0.753668826	-0.380785199
P15261	1.134795224	-0.752275542	-0.382519683
Q8C5P7	1.134787852	-0.752305793	-0.382482058
Q8VEB4	1.134706232	-0.75264026	-0.382065971
O54950	1.134686454	-0.752721189	-0.381965265
Q9JIX0	1.134668556	-0.752794384	-0.381874172
Q8BSK8;Q9Z1M4	1.135308499	-0.750153454	-0.385155045
P17426	1.135213215	-0.750549817	-0.384663397
Q9D6N5	1.135183891	-0.750671575	-0.384512315
P68040	1.135078852	-0.751106851	-0.383972001
Q8VCZ6	1.135132863	-0.750883198	-0.384249666
P30115;E9Q6L7;Q6P8Q0;P10648;P13745	1.135021676	-0.751343224	-0.383678452
Q8C460	1.135022725	-0.751338893	-0.383683832
Q3UN90	1.134974439	-0.751538212	-0.383436227
Q9CY52	1.134938526	-0.751686273	-0.383252253
Q06180	1.151050078	-0.654978094	-0.496071984
Q5SYD0	1.151001199	-0.655482976	-0.495518222
O88396	1.151309355	-0.652238467	-0.499070888
P14106	1.151332624	-0.651987292	-0.499345332
Q8BK58	1.151194619	-0.653463942	-0.497730677
P09450	1.151240221	-0.652979434	-0.498260788
Q8CI94	1.151280218	-0.652551717	-0.498728501
Q9ESZ8	1.151723421	-0.647624316	-0.504099105
Q62193	1.151889675	-0.645677421	-0.506212253
Q922R1	1.151828283	-0.646403177	-0.505425106
Q8CGC6	1.151423509	-0.650997397	-0.500426112
Q9CQJ4;O35730	1.151454466	-0.65065693	-0.500797536
O35671	1.151616428	-0.64884726	-0.502769167
Q3V3R1	1.151533463	-0.649780325	-0.501753139
Q5PRF0	1.150083662	-0.664376473	-0.485707188
Q8R4G0	1.150118169	-0.664059918	-0.486058251
Q8BH55	1.150204982	-0.66325789	-0.486947092
Q9D0L4	1.15020763	-0.663233303	-0.486974326
Q9JJH1	1.15029002	-0.662464263	-0.487825758
Q62261	1.150302805	-0.662344253	-0.487958552
Q8WTY4	1.150296445	-0.662403978	-0.487892467
Q61239	1.150717187	-0.658349359	-0.492367828
P62843	1.150655988	-0.658952742	-0.491703246
Q9DAK9	1.150663216	-0.658881724	-0.491781492
P14869	1.150475918	-0.660700653	-0.489775264
P23953;D3Z5G7	1.150455828	-0.660893202	-0.489562625
Q5SWD9	1.150513509	-0.660339062	-0.490174448
P01101	1.150542476	-0.660059253	-0.490483224
Q60632;P43135;P43136	1.150569973	-0.659792699	-0.490777274
Q8BV13	1.150559683	-0.659892558	-0.490667125
Q9CRB6;Q0P5Y3	1.14989381	-0.666096061	-0.48379775
Q91ZZ3	1.149704776	-0.667772761	-0.481932015
Q9CYA0	1.149698753	-0.667825628	-0.481873124
P62069	1.149666435	-0.668108705	-0.481557729
Q9EQG7	1.149633893	-0.668392764	-0.481241129
Q9DBF1	1.149506199	-0.669498144	-0.480008055
Q3TIR3	1.149447585	-0.670000692	-0.479446892
Q8BTG3	1.149403374	-0.670377768	-0.479025606
Q9CQN3	1.14929326	-0.671309718	-0.477983542
Q9DC04	1.149243682	-0.67172601	-0.477517671
P39053	1.14910606	-0.672871118	-0.476234942
Q9JL18	1.149163025	-0.672398976	-0.47676405
D3Z3L3;Q99PQ1	1.145158805	-0.700870022	-0.444288783
Q924W7	1.145063321	-0.701459911	-0.44360341
Q91VT4	1.144944906	-0.702187033	-0.442757872
Q9D868	1.144973939	-0.702009205	-0.442964734
P47915;W4VSN7	1.144836287	-0.702849761	-0.441986527
Q9WTX6	1.144891823	-0.702511412	-0.442380411
P62852	1.144726804	-0.703513726	-0.441213078
Q8BRM2	1.144563676	-0.704495657	-0.440068018
Q61425	1.144624116	-0.704132863	-0.440491253
Q9QWY8	1.144630749	-0.704092977	-0.440537771
E9PZM7	1.144415561	-0.705379727	-0.439035834
Q9JKZ2	1.144443213	-0.70521521	-0.439228003
Q9QYY8	1.14428003	-0.70618258	-0.43809745
Q9CRD0	1.144195767	-0.706678842	-0.437516925
Q9D4F8	1.144187216	-0.706729085	-0.437458131
Q9QY40	1.143826978	-0.708825441	-0.435001537
Q3U1T3	1.14380826	-0.708933319	-0.43487494
Q9DC48	1.143798158	-0.708991493	-0.434806665
A0A2R8VKG2	1.143964431	-0.708030133	-0.435934298
P12382	1.144074068	-0.707391738	-0.436682329
Q6PEB6	1.144024852	-0.707678755	-0.436346097
Q9QZB7	1.143668326	-0.709736555	-0.433931771
Q9Z1W8	1.143684598	-0.709643441	-0.434041157
O88874	1.14352544	-0.71055096	-0.432974481
Q60805	1.143574503	-0.710271967	-0.433302536
Q8C0Y0	1.143591269	-0.710176474	-0.433414795
Q9R0E1	1.143393474	-0.711298038	-0.432095436
P00493	1.143201892	-0.712374079	-0.430827814
Q810V0	1.143270756	-0.711988449	-0.431282307
P00520	1.143062914	-0.713148479	-0.429914435
Q61271	1.142977129	-0.713623928	-0.429353202
E9Q634;P70248	1.142749584	-0.714875807	-0.427873777
Q9Z2I9	1.14273935	-0.714931799	-0.427807551
P53996	1.142851667	-0.71431583	-0.428535836
P54822	1.142865003	-0.714242477	-0.428622526
A0A1Y7VP24;Q9QZ73	1.142111807	-0.718315759	-0.423796048
Q5PR73	1.142518556	-0.7161334	-0.426385156
P35585;Q9WVP1	1.142306349	-0.717276934	-0.425029415
Q99JX4	1.142294359	-0.717341221	-0.424953139
Q80TZ3	1.142383134	-0.716864424	-0.42551871
Q9R111	1.14239988	-0.71677427	-0.42562561
Q8K4M5	1.14884647	-0.674990828	-0.473855642
P54731	1.148337702	-0.679003923	-0.469333778
Q3TY86	1.148511662	-0.677651779	-0.470859882
Q9CX60	1.148467557	-0.677996501	-0.470471056
Q00422	1.148588549	-0.677047662	-0.471540887
Q3UGC7;Q66JS6	1.148638604	-0.676652182	-0.471986422
Q8CHK4	1.148006313	-0.681525848	-0.466480464
Q6NSR8	1.148174163	-0.68025708	-0.467917083
A2ACP1	1.148119508	-0.680672121	-0.467447387
Q6ZQ38	1.148069402	-0.681050991	-0.46701841
P62827;Q14AA6;Q61820	1.147547391	-0.684909826	-0.462637565
Q7M6Z0	1.147606554	-0.684480274	-0.46312628
O08599	1.147770062	-0.683282991	-0.464487072
Q924L1	1.147881976	-0.682454709	-0.465427266
Q5SSH8	1.147271	-0.686891581	-0.460379419
Q812A2	1.147273299	-0.686875262	-0.460398037
A2RT62	1.147240541	-0.687107519	-0.460133022
P43247	1.147228893	-0.687189975	-0.460038918
Q3V1L4	1.146764766	-0.690420533	-0.456344233
A2A5Z6	1.14678764	-0.690263754	-0.456523886
Q9Z1A9	1.146784518	-0.69028517	-0.456499347
P62317	1.147051542	-0.688436907	-0.458614635
Q9DCJ9	1.146988982	-0.688873024	-0.458115958
Q00PI9	1.146881445	-0.68961823	-0.457263215
Q8BHS3	1.146922958	-0.689331218	-0.45759174
Q8CDE2	1.146951172	-0.689135678	-0.457815494
Q60738	1.14621611	-0.694110003	-0.452106107
Q9DC23	1.146359176	-0.693160752	-0.453198424
O70477;Q8BG99	1.146296128	-0.69358016	-0.452715968
Q8CI32	1.146305557	-0.69351755	-0.452788006
Q61205	1.145393739	-0.699404749	-0.44598899
Q80X85	1.145522539	-0.698592844	-0.446929695
P70704	1.145481752	-0.698850618	-0.446631134
Q8K4R4	1.145502043	-0.698722457	-0.446779585
Q3U3Q1	1.145767568	-0.697030918	-0.44873665
Q61025	1.145713419	-0.697378076	-0.448335343
Q9JJU8	1.14572017	-0.697334857	-0.448385313
Q91WA3	1.145972006	-0.695709764	-0.450262241
P43252	1.145910265	-0.696110515	-0.449799751
Q5SSZ5	1.14585031	-0.696498213	-0.449352097
Q8VCV1	0.9564452	-1.038498812	0.082053612
Q9CPR4;B2RY53	0.956010323	-1.038837754	0.082827431
P08556	0.955610166	-1.039148924	0.083538758
P36895;P36898	0.95567869	-1.039095687	0.083416996
Q5HZI9;Q3V0T4	0.953467244	-1.040803796	0.087336552
Q9CQJ1	0.953097838	-1.041087123	0.087989285
Q9CRC0	0.954277518	-1.040180333	0.085902815
O70293	0.954656997	-1.039887397	0.0852304
Q80WG7	0.954655678	-1.039888416	0.085232738
Q9DA37	0.962413653	-1.033764489	0.071350836
P35285	0.962691466	-1.033540314	0.070848848
Q8CGA0	0.962816561	-1.03343926	0.070622699
Q8BH70	0.961039369	-1.0348684	0.073829032
E9Q7M2;Q9Z2S7	0.960899851	-1.034980004	0.074080153
Q91XL9	0.960772918	-1.035081465	0.074308547
Q5BKP2	0.961665749	-1.034366288	0.072700539
Q62448	0.961824763	-1.034238546	0.072413783
Q8BG51	0.961277688	-1.034677565	0.073399877
P17710	0.961464914	-1.034527468	0.073062554
Q9CZW4	0.96140505	-1.034575477	0.073170427
F8VQ05	0.959504436	-1.036091528	0.076587093
Q9CXC3	0.959961969	-1.035728016	0.075766047
Q6NS82	0.957358354	-1.037784477	0.080426123
Q9WUM4;Q920M5	0.958009929	-1.037272581	0.079262652
A2AI05	0.957800757	-1.037437112	0.079636355
P97447	0.957830479	-1.037413744	0.079583265
Q9CWW6	0.958885596	-1.036581748	0.077696152
Q9QXK3	0.958992825	-1.036496926	0.077504101
Q91XX1	0.958269465	-1.037068174	0.078798709
P67871	0.958689446	-1.036736784	0.078047338
P61028;REV__G3UYX5	0.958561514	-1.03683781	0.078276296
Q8C5L6	0.958621647	-1.036790333	0.078168686
Q69ZN6	0.96905108	-1.028313185	0.059262105
Q9CZW5	0.968921461	-1.028421576	0.059500115
Q9DCA2	0.968450999	-1.028814333	0.060363334
O70493	0.968555398	-1.028727265	0.060171867
Q8CIP4	0.968597307	-1.0286923	0.060094993
Q9DB34	0.96795191	-1.029229864	0.061277954
P08752;P20612;Q3V3I2;P50149	0.967464312	-1.029634715	0.062170403
Q8CBY1	0.967269776	-1.029795931	0.062526155
Q8VHK9	0.965866352	-1.030953835	0.065087482
Q9D8B1	0.966433562	-1.030486941	0.064053379
Q3UX43	0.963627479	-1.032782488	0.069155009
Q91ZR1	0.963807109	-1.032636604	0.068829495
Q9R0M8	0.964275796	-1.032255288	0.067979492
Q80Y98	0.964368299	-1.032179911	0.067811612
Q8R123	0.964350359	-1.032194533	0.067844174
Q3UJD6	0.964950042	-1.031704993	0.066754951
Q0VBD0	0.964815939	-1.031814606	0.066998667
Q8C0C7	0.964686434	-1.031920384	0.06723395
O08583;Q9JJW6	0.973508748	-1.024537358	0.05102861
Q9CQU5	0.97424485	-1.023904717	0.049659867
Q9JII1	0.975895034	-1.022476901	0.046581867
P57724	0.97545194	-1.022861592	0.047409652
Q3THE2	0.97564633	-1.022692943	0.047046613
Q3UFB7	0.974942368	-1.023302813	0.048360445
Q91V51	0.974819246	-1.02340923	0.048589984
Q6ZPJ3	0.975292189	-1.023000052	0.047707862
Q9D1G2	0.975161315	-1.02311339	0.047952075
P58044	0.96980889	-1.027677913	0.057869023
Q9CZW6	0.969827455	-1.027662316	0.057834861
Q61644	0.970985255	-1.026686425	0.05570117
Q8R151	0.970876156	-1.026778653	0.055902497
Q91W96	0.970558371	-1.027046973	0.056488602
Q60737	0.970461369	-1.027128782	0.056667413
Q8C3F2	0.970443227	-1.027144078	0.056700852
Q80UJ7	0.972885354	-1.025071089	0.052185735
Q8K274	0.972916535	-1.025044437	0.052127901
O54879	0.972742665	-1.025192992	0.052450328
Q9EQ06	0.972574851	-1.025336235	0.052761383
Q791V5	0.971445574	-1.02629667	0.054851096
Q9JKF1;F8VQ29	0.971545586	-1.026211856	0.054666271
Q8R1C0	0.971990185	-1.025834244	0.053844059
Q9WU66	0.972106826	-1.025735022	0.053628197
Q91VC9	0.978973868	-1.019777066	0.040803197
Q91YE3;Q91UZ4	0.978626793	-1.02008378	0.041456987
Q7TSI3	0.977768741	-1.02083946	0.043070718
Q8C522	0.977843992	-1.020773334	0.042929342
Q9CZX7	0.978196647	-1.020463067	0.04226642
Q9JMA1	0.97837571	-1.020305288	0.041929579
Q3TDK6	0.978319694	-1.020354663	0.042034969
Q9QXY6	0.978268578	-1.020399705	0.042131128
Q8VCM5	0.982309489	-1.016798208	0.034488719
Q8CGP0;Q9D2U9;Q64524	0.981585157	-1.017449901	0.035864744
Q8CIB5	0.981736855	-1.017313639	0.035576783
Q9CX34	0.981680586	-1.017364196	0.03568361
Q3UPL0	0.98106183	-1.017919068	0.036857238
P10922	0.980720876	-1.018223983	0.037503107
Q7TMB8	0.980775379	-1.018175281	0.037399901
Q3U2I3	0.979472178	-1.019335645	0.039863467
P83882;A0A2I3BPG9;A0A0A6YW33	0.979634056	-1.019191977	0.039557921
Q63932	0.979576563	-1.019243018	0.039666454
Q62086	0.979926137	-1.01893242	0.039006284
Q8CGF5	0.980125727	-1.018754805	0.038629078
Q61656	0.980300682	-1.018598947	0.038298265
Q8VC42	0.980234989	-1.018657488	0.038422499
Q6PGN3	0.985586554	-1.013815693	0.028229139
Q3UHX0	0.98475038	-1.014582061	0.029831681
Q9WUA6	0.984618223	-1.014702848	0.030084625
O70378	0.984961011	-1.014389362	0.029428351
Q9D7A6	0.985149749	-1.014216494	0.029066745
Q3TES0	0.983388753	-1.015822148	0.032433395
P48962	0.983033133	-1.01614443	0.033111297
Q9QUI0;Q9CR99	0.983145223	-1.016042919	0.032897696
Q80U58	0.984287811	-1.015004431	0.030716621
Q8CFV4	0.983835108	-1.015416704	0.031581595
Q3U3W5	0.986562907	-1.012916155	0.026353248
E9Q912	0.986366135	-1.013097854	0.026731719
Q05AA6	0.986406734	-1.013060382	0.026653647
Q62101	0.986836044	-1.012663596	0.025827552
P60670	0.987079776	-1.012437891	0.025358115
O09126	0.987211876	-1.012315426	0.02510355
P15655	0.987267982	-1.012263385	0.024995403
O88587	0.990042713	-1.009668391	0.019625679
Q9CRA0	0.989878508	-1.009823129	0.01994462
Q3TGW2	0.987889573	-1.011685691	0.023796118
Q99LR1	0.988797853	-1.010837795	0.022039942
Q9D1M0	0.989095963	-1.010558526	0.021462563
P53702	0.991124327	-1.008645419	0.017521092
Q8VCS3	0.991061916	-1.008704622	0.017642705
P59644	0.991591308	-1.008201751	0.016610443
Q99N96	0.991469537	-1.008317559	0.016848022
Q9D4V7	0.992629774	-1.007210765	0.014580991
P61222	0.992494625	-1.007340077	0.014845452
Q922H2	0.992557673	-1.007279765	0.014722092
Q9D1I2	0.991816956	-1.007986933	0.016169977
Q3TLI0	0.992135029	-1.007683643	0.015548613
Q99KD5	0.992079726	-1.007736416	0.01565669
Q9CR60	0.993792224	-1.006094268	0.012302044
Q69ZS7	0.993613562	-1.006266365	0.012652803
Q9WUC3	0.993553348	-1.006324324	0.012770976
Q9ER88	0.994339017	-1.00556644	0.011227423
Q9JJ89	0.994081787	-1.00581496	0.011733174
Q2UY11	0.994168103	-1.005731608	0.011563505
Q9ES00	0.994230959	-1.005670884	0.011439925
Q8BMG8	0.995900666	-1.00404953	0.008148864
Q9ERE9	0.995907219	-1.004043136	0.008135917
Q9CR56	0.996406251	-1.003555416	0.007149165
Q80ZD3	0.996250446	-1.003707844	0.007457397
Q8K2F8	0.99623116	-1.003726702	0.007495542
Q4VC33	0.994810955	-1.005109498	0.010298543
Q9D9K3	0.994636588	-1.005278473	0.010641885
Q6PIC6;Q64436	0.995357101	-1.004579114	0.009222012
Q9WVC3	0.995025382	-1.004901464	0.009876082
P34914	0.99702938	-1.002944379	0.005914999
Q3TXS7	0.996831043	-1.003139113	0.006308069
Q6IEE6	0.996749923	-1.003218693	0.00646877
Q91W52	0.99676401	-1.003204876	0.006440867
Q6DVA0	0.99738166	-1.002597932	0.005216272
Q91ZV7	0.997412013	-1.002568049	0.005156036
Q8BGF6	0.997689685	-1.002294412	0.004604728
Q5BLK4	0.997851187	-1.00213505	0.004283863
Q8BLQ9	0.997833731	-1.002152281	0.00431855
P46935	0.999973911	-1.000026087	5.22E-05
P34928	0.998192645	-1.001797609	0.003604964
Q61730	0.998355023	-1.001636899	0.003281876
Q7TQD2	0.998374844	-1.001617271	0.003242427
G5E8G3	0.998471223	-1.001521797	0.003050574
Q3U186	0.998508631	-1.001484726	0.002976096
Q64311	0.99921586	-1.000782299	0.001566439
P62305	0.998824867	-1.001171005	0.002346138
P50172	0.998975736	-1.001021126	0.002045391
O55028	0.999042058	-1.000955197	0.001913139
P08113	0.999022872	-1.000974272	0.001951399
A2A5R2	1.001094282	-0.998902114	-0.002192168
Q64253	1.001227947	-0.998767512	-0.002460435
P24526	1.000727441	-0.999270968	-0.001456472
Q99KC8	1.000876876	-0.999120812	-0.001756064
Q8JZR6;Q5DTL9	1.001965807	-0.998022531	-0.003943276
Q8VC88	1.001366341	-0.998628036	-0.002738305
P61226	1.001626205	-0.998365822	-0.003260383
Q9D8B7	1.001545882	-0.998446915	-0.003098967
Q9WTK7	1.004857747	-0.995070408	-0.009787339
Q9DB05	1.004518885	-0.995419008	-0.009099877
P10493	1.004340218	-0.995602521	-0.008737697
Q9CR67	1.004327477	-0.995615599	-0.008711878
Q9CTY5	1.003330773	-0.996635608	-0.006695165
P48453	1.00356446	-0.99639701	-0.00716745
Q3ZK22	1.003516926	-0.99644557	-0.007071356
Q8BNW9	1.002661719	-0.997316855	-0.005344863
Q62130	1.00309404	-0.996876971	-0.006217069
Q99J95	1.003054283	-0.996917471	-0.006136813
Q8BGX2	1.002964297	-0.997009105	-0.005955192
Q3UIU2	1.00292311	-0.997051029	-0.005872082
Q9D6U8	1.002929048	-0.997044985	-0.005884062
Q8BGD5	0.891258922	-1.081430649	0.190171726
Q9WV54	0.891257526	-1.081431418	0.190173892
Q3UHD6;Q91VY6	0.89049406	-1.081851497	0.191357437
Q6NVE9	0.890606548	-1.081789709	0.191183161
Q9WTQ8	0.89226508	-1.080874432	0.188609352
Q5RJI5	0.893280328	-1.080310182	0.187029853
B1AYL1	0.89292028	-1.080510635	0.187590355
Q64676	0.892849947	-1.080549748	0.187699801
Q8BWY9	0.892861795	-1.08054316	0.187681365
Q8BQM7	0.895044834	-1.079322274	0.18427744
Q6NS57	0.894716826	-1.079506616	0.18478979
Q91YK0	0.894573284	-1.079587187	0.185013903
Q8C729	0.894146889	-1.079826166	0.185679277
Q6ZPQ6	0.893522131	-1.080175347	0.186653216
Q8BH43	0.893735489	-1.080056229	0.18632074
Q6NTA4	0.896771049	-1.078346844	0.181575795
Q91V57	0.896805174	-1.078327471	0.181522297
Q9D0L7	0.896820043	-1.078319029	0.181498986
A0A2I3BRL8;Q91VM5	0.89728737	-1.078053354	0.180765985
Q9D1H9	0.897179626	-1.078114665	0.180935039
Q8K0T0	0.896276853	-1.078627008	0.182350155
A6H5Z3	0.895937223	-1.078819124	0.182881902
Q8BMJ3	0.895919669	-1.078829044	0.182909375
Q91WQ3	0.895703011	-1.078951408	0.183248397
Q9CZM2	0.895633411	-1.078990687	0.183357275
A2ADA5	0.886752619	-1.083885751	0.197133132
A2AJ15	0.885616046	-1.08449577	0.198879724
Q8K2H1	0.885962251	-1.084310345	0.198348094
Q8C8N2	0.889173355	-1.082574184	0.193400829
D3Z689	0.887863803	-1.083285794	0.195421991
P57784	0.887823655	-1.083307533	0.195483878
Q9JLV5	0.887961002	-1.083233146	0.195272144
O88746	0.888030357	-1.083195563	0.195165206
Q9EPT5	0.888056341	-1.083181479	0.195125138
P27808	0.884443554	-1.085121225	0.200677671
P54285	0.884341664	-1.085175394	0.20083373
Q8VDQ8	0.884727645	-1.084970036	0.200242392
Q9JMG3	0.884578591	-1.085049389	0.200470798
Q8VCF1	0.883671289	-1.085531062	0.201859773
P97792	0.883842375	-1.085440412	0.201598037
Q3UM18	0.883852892	-1.085434837	0.201581945
Q9JHZ2	0.883334479	-1.085709279	0.202374799
P29452	0.882893379	-1.085942198	0.203048819
Q5SSL4	0.88314749	-1.085808084	0.202660594
Q6NZQ6	0.883054823	-1.085857012	0.202802189
Q7TMQ7	0.88071919	-1.087082318	0.206363128
Q8BTX9	0.880663462	-1.087111369	0.206447908
Q61466	0.881065662	-1.086901514	0.205835852
O89112	0.880964591	-1.086954292	0.205989701
P61358	0.880985762	-1.086943239	0.205957476
P31750	0.881990064	-1.086417487	0.204427423
P14115	0.882571359	-1.086111894	0.203540536
Q3TWI9	0.882496138	-1.086151492	0.203655354
Q9JI99	0.872273588	-1.09138796	0.219114373
P17439	0.872441761	-1.091304104	0.218862343
Q8CCH2	0.872436419	-1.091306769	0.21887035
P62849	0.871830398	-1.091608586	0.219778188
Q8VDD8	0.871518048	-1.091763764	0.220245716
Q91X88	0.873915619	-1.090565963	0.216650344
P16254	0.873707907	-1.090670342	0.216962435
P97742	0.873628709	-1.09071011	0.2170814
Q8BLI0	0.872790434	-1.091130006	0.218339571
Q80U95	0.873280196	-1.09088491	0.217604714
Q8BP67	0.873107399	-1.090971458	0.217864059
P36423	0.878374115	-1.088297361	0.209923246
Q99JY4	0.878514058	-1.088225278	0.20971122
P61922	0.879452187	-1.087740668	0.208288481
REV__Q9WV27;Q6A078	0.879449918	-1.087741843	0.208291925
Q9QYB1	0.879110851	-1.087917272	0.20880642
Q6T3U4	0.879180158	-1.087881439	0.208701281
Q99MJ9	0.879166464	-1.08788852	0.208722056
Q9JKV5	0.877387172	-1.088804202	0.21141703
Q9CQF9	0.87532931	-1.089852472	0.214523162
Q8R1G2	0.875389157	-1.089822149	0.214432992
Q9JJD0	0.875436306	-1.089798252	0.214361946
Q8R3Y8	0.876568795	-1.08922246	0.212653664
Q9CQ10	0.876490168	-1.089262548	0.21277238
P35803	0.875862293	-1.089582075	0.213719783
Q7TMS5	0.876204789	-1.089407911	0.213203121
Q8VBT0	0.865555146	-1.094676898	0.229121752
Q9CRA9	0.866186471	-1.094372865	0.228186394
Q64282;D3Z6F0;Q3U687	0.867322022	-1.093823402	0.226501381
P97865	0.866624498	-1.094161313	0.227536815
P60603	0.866911648	-1.094022358	0.22711071
Q8BGX0	0.866795436	-1.09407862	0.227283183
Q0QWG9	0.868043989	-1.093472315	0.225428325
Q9JJR8	0.868799301	-1.093103553	0.224304252
Q921G7	0.868679863	-1.093161965	0.224482102
Q80ZJ1	0.868636587	-1.09318312	0.224546534
Q8VE11	0.868622107	-1.093190198	0.224568091
Q921J2	0.870445343	-1.092294721	0.221849378
Q8K411	0.869691371	-1.092666093	0.222974722
O35678	0.869575874	-1.09272285	0.223146976
P62743	0.869593109	-1.092714383	0.223121274
P0DN91;P0DN90;P0DN89	0.869426164	-1.092796366	0.223370202
Q920A7	0.869233625	-1.092890827	0.223657202
Q9JIP6	0.869280883	-1.092867652	0.223586769
O88327	0.858622779	-1.097948206	0.239325427
Q91ZW2	0.858670557	-1.097926077	0.23925552
O08746	0.8583661	-1.098066993	0.239700893
Q9JJ00	0.858410872	-1.098046285	0.239635414
E9PW43;Q9CQS8	0.858192637	-1.098147175	0.239954538
G5E829	0.858133103	-1.098174677	0.240041574
Q8BKC8	0.859453248	-1.097562746	0.238109498
P97813	0.860735961	-1.096963963	0.236228002
Q6P5E4	0.860558759	-1.09704693	0.236488172
P59016	0.86005119	-1.097284138	0.237232948
P97857	0.860293076	-1.097171176	0.236878099
Q3TRR0	0.861507663	-1.096601719	0.235094056
Q91XD2	0.861852976	-1.096439137	0.234586161
D3Z7P3	0.861732129	-1.096496069	0.23476394
Q9WVA2;Q4FZG7	0.861677696	-1.096521701	0.234844005
Q60790	0.862312693	-1.096222219	0.233909525
F8VPZ3	0.862603716	-1.096084621	0.233480904
Q9CY50	0.862676289	-1.096050274	0.233373985
Q8BKE9	0.863832987	-1.095501023	0.231668036
P70182	0.863508375	-1.095655509	0.232147134
Q8BTJ4;Q3TIW9	0.863583804	-1.095619636	0.232035832
Q8C6G1	0.864404044	-1.095228595	0.230824551
Q8C4B4	0.864652008	-1.09511004	0.230458033
P05533	0.864744876	-1.095065598	0.230320723
Q924D1;Q3UNV4;Q3UNV2;A0A140T8U1;O54749	0.864778386	-1.095049556	0.23027117
Q8BHN0	0.90095278	-1.075946666	0.174993886
O55029	0.900840624	-1.076011734	0.17517111
Q9CR51	0.900828992	-1.076018481	0.175189489
Q9CRA4	0.900823906	-1.07602143	0.175197524
Q9DBS9	0.899186634	-1.076966848	0.177780214
Q9JKJ9	0.898321523	-1.077463102	0.179141578
P01887	0.903243146	-1.074609425	0.171366279
Q9Z1K5	0.903170076	-1.074652338	0.171482262
Q8BWT5	0.903050321	-1.074722632	0.171672311
Q8VCX5	0.902902492	-1.074809343	0.171906852
Q91WF7	0.902868957	-1.074829005	0.171960048
Q3UUG6	0.904351968	-1.073956201	0.169604232
Q8CG76	0.904046567	-1.074136499	0.170089932
O70491	0.903783444	-1.074291605	0.170508162
Q8VI36	0.903825717	-1.074266701	0.170440984
Q9WTT4	0.903842323	-1.074256916	0.170414593
P42703	0.906808324	-1.072495429	0.165687105
Q921Q3	0.906860843	-1.07246399	0.165603147
Q68FF0	0.906604784	-1.072617194	0.16601241
Q9QXL2;Q9QXL1;B7ZNG0;Q7M6Z4	0.906586543	-1.0726281	0.166041558
P70392	0.906691933	-1.072565075	0.165873141
Q8BGS7	0.906729729	-1.072542464	0.165812735
G3X9G9	0.905663754	-1.073178452	0.167514699
P80313	0.904930259	-1.073614	0.168683741
Q922M3;O70479;Q8BGV7	0.904834964	-1.073670463	0.168835499
A2BE28	0.907876169	-1.071854459	0.16397829
Q91YV9	0.908180581	-1.071671074	0.163490492
Q3U0V2	0.908504029	-1.071475898	0.162971869
P56565	0.908781838	-1.071307995	0.162526157
Q9D024	0.908998779	-1.071176708	0.162177928
Q9CPQ8;J3QNM7	0.912722403	-1.068899659	0.156177256
Q9D6G9	0.912406826	-1.06909438	0.156687555
Q9D7H3	0.912114554	-1.069274433	0.157159879
P35980	0.911166337	-1.069856666	0.15869033
Q3UGP8	0.911135598	-1.069875492	0.158739894
Q8VDB2	0.910404032	-1.070322633	0.159918601
Q80WR1	0.91066236	-1.070164938	0.159502578
Q80YE4	0.910742664	-1.070115872	0.159373208
Q0GNC1	0.913913968	-1.068161487	0.154247518
Q64310	0.915239275	-1.067334983	0.152095707
P70122	0.915134742	-1.067400383	0.152265641
Q9CYU6	0.915066685	-1.067442943	0.152376258
P97855	0.914829357	-1.067591239	0.152761882
Q8R3I2	0.91443468	-1.067837444	0.153402764
Q99JB8	0.916134322	-1.066773517	0.150639196
Q9CY27	0.915775176	-1.06699913	0.151223954
O88531	0.917217844	-1.066090255	0.14887241
Q9CQ40	0.916424954	-1.066590631	0.150165677
P70290	0.916669223	-1.066436702	0.149767479
Q99N28	0.91670302	-1.066415388	0.149712368
P09470	0.918898817	-1.065022462	0.146123645
Q99K23	0.919168119	-1.064850511	0.145682392
Q9DCS3	0.918355839	-1.065368413	0.147012574
Q91V01	0.91775466	-1.065750289	0.147995628
O70481	0.917975816	-1.065609949	0.147634133
Q6WKZ8	0.918014325	-1.065585496	0.14757117
Q9ERU3	0.919943792	-1.064353865	0.144410073
P83870	0.920372917	-1.064078229	0.143705312
Q8VBY2	0.920526581	-1.063979375	0.143452793
Q922J9	0.920510684	-1.063989605	0.143478921
O35657	0.921297798	-1.063482023	0.142184226
Q8VIJ6	0.921395048	-1.063419163	0.142024115
Q64516;Q9WU65;Q8C635	0.921896	-1.063094846	0.141198845
Q80UK0	0.921773314	-1.063174352	0.141401038
Q9JK53	0.935227635	-1.054139139	0.118911504
Q6DFV7	0.934934238	-1.054343152	0.119408914
Q80TT8	0.934938813	-1.054339973	0.119401159
Q811U4	0.935613003	-1.053870689	0.118257686
P27612	0.936101848	-1.053529359	0.117427511
Q9EQH3	0.936119167	-1.05351725	0.117398082
Q8R2Y8	0.929946981	-1.057762626	0.127815645
Q9CYH2	0.92993366	-1.057771639	0.127837978
Q9ER41	0.92961767	-1.057985234	0.128367564
O70421	0.929767995	-1.057883666	0.12811567
P62082	0.929777202	-1.057877443	0.128100241
P23708	0.930287153	-1.057532266	0.127245114
Q80XH1	0.930459003	-1.057415733	0.126956731
Q00651	0.930908224	-1.057110607	0.126202383
Q8BSI6	0.930946218	-1.057084767	0.126138549
Q3UUI3	0.930679032	-1.057266373	0.126587341
Q9R1E6	0.930602515	-1.057318335	0.12671582
P06802	0.93333541	-1.055449294	0.122113883
Q9Z2X2	0.933364662	-1.055429141	0.122064479
Q6PDX6	0.933024955	-1.055662989	0.122638034
Q8BGK5	0.933105044	-1.055607895	0.122502851
Q8C166	0.931967159	-1.05638845	0.124421291
Q8BTZ5	0.931233024	-1.056889538	0.125656514
Q9D273	0.931426442	-1.056757709	0.125331267
Q9EPN1	0.931385349	-1.056785729	0.12540038
Q9CQC6	0.929117393	-1.058322667	0.129205274
Q8CFZ4	0.928724837	-1.058586815	0.129861978
Q9D0M1	0.928380114	-1.058818322	0.130438208
Q3TCH7	0.926544075	-1.060044237	0.133500161
Q9D3P8	0.926610451	-1.060000126	0.133389675
Q5XG73;E9Q289	0.927480264	-1.059420642	0.131940378
P63321	0.927858624	-1.059167735	0.131309111
Q8C3X8	0.927871398	-1.059159187	0.131287789
Q7TSJ6;Q8BYR2	0.925661868	-1.060629043	0.134967175
Q922L6	0.925373801	-1.060819408	0.135445606
P53811	0.925235253	-1.060910861	0.135675608
P68369	0.925293768	-1.060872245	0.135578477
Q07646	0.92530301	-1.060866144	0.135563134
Q8CIE6	0.922415722	-1.062757466	0.140341744
Q61941	0.923341431	-1.06215423	0.1388128
Q9Z277	0.923430296	-1.062096166	0.13866587
P63030	0.923162584	-1.062271006	0.139108423
Q8K449	0.923024335	-1.062361198	0.139336862
Q9CQI3	0.923012571	-1.06236887	0.139356299
Q3TFD2	0.951402935	-1.042379808	0.090976873
Q9CPW2	0.951747299	-1.042118128	0.090370829
Q9CUN6	0.951701879	-1.04215267	0.090450791
A6H8H5	0.951932225	-1.041977402	0.090045177
Q60629	0.951885183	-1.042013213	0.09012803
P57722	0.950972883	-1.042705916	0.091733033
Q8CI51	0.950564646	-1.043014778	0.092450132
Q9DC71	0.949674709	-1.043685717	0.094011008
P35918	0.950170486	-1.043312341	0.093141855
Q91Z61	0.950100432	-1.043365161	0.093264728
P61080	0.949145425	-1.044083223	0.094937798
Q8VDP6	0.94896059	-1.044221771	0.095261181
Q8K4B2	0.948640893	-1.04446108	0.095820188
P18052	0.948186117	-1.044800791	0.096614674
Q920Q6	0.94833478	-1.044689834	0.096355054
Q8CGK7	0.946613201	-1.045969316	0.099356115
Q99LJ1	0.946358106	-1.046157894	0.099799788
Q9Z0E0	0.946423655	-1.046109461	0.099685806
Q9JI48	0.947832704	-1.045064209	0.097231505
D3YXJ9;Q9D7U6	0.947066011	-1.045633939	0.098567928
Q8C180	0.947174416	-1.045553526	0.09837911
Q60973	0.945577298	-1.04673349	0.101156192
Q6ZPU9	0.945645507	-1.046683304	0.101037797
P48193	0.945262659	-1.046964751	0.101702091
Q8C1D8	0.94503098	-1.047134785	0.102103805
Q8BSZ2	0.943324104	-1.048380983	0.105056879
Q6PDY2	0.943049198	-1.048580626	0.105531428
Q9Z0V7	0.942881688	-1.04870213	0.105820442
P54823	0.944396114	-1.047599642	0.103203528
Q04519	0.943930243	-1.047939749	0.104009506
Q8CHQ0	0.943681126	-1.048121266	0.10444014
P19783	0.94106325	-1.050014127	0.108950877
Q9Z1T1	0.942021656	-1.049324238	0.107302582
Q9CZX8	0.937929338	-1.052245406	0.114316068
P48441	0.938466858	-1.05186536	0.113398502
O88351	0.938812992	-1.051620052	0.112807061
Q99JT2	0.938723871	-1.051683256	0.112959385
P59913	0.939283368	-1.051285962	0.112002593
P62281	0.93935238	-1.051236874	0.111884494
P70255	0.94053177	-1.050395174	0.109863404
Q9D289	0.940488071	-1.050426456	0.109938385
Q8K157	0.940244375	-1.050600771	0.110356396
Q8R395	0.939973326	-1.050794385	0.110821058
Q91WG4	0.93996288	-1.050801841	0.11083896
Q9QYE9	1.106803874	-0.838426301	-0.268377573
P17742	1.106989503	-0.837977934	-0.269011569
Q8VEJ9	1.10710541	-0.837697402	-0.269408008
O88448	1.106342595	-0.839535658	-0.266806937
Q4KML4	1.106107788	-0.840097743	-0.266010045
Q9Z1W9	1.105974418	-0.840416225	-0.265558193
Q8BZQ7	1.10781676	-0.835966034	-0.271850726
D3YTP3	1.108220622	-0.834975562	-0.27324506
Q8BUY9	1.108132064	-0.83519322	-0.272938844
Q9CQY6	1.10815576	-0.835135006	-0.273020755
P63028	1.108851131	-0.833418176	-0.275432956
Q8CAA7	1.108777875	-0.833599821	-0.275178054
Q8C7D2	1.108502072	-0.834282047	-0.274220026
Q8R3U1	1.108576376	-0.834098506	-0.27447787
Q3UH53	1.109314837	-0.832264056	-0.277050781
P62881	1.109402188	-0.832045806	-0.277356382
P41241	1.109423629	-0.831992194	-0.277431435
P60202	1.109428909	-0.831978989	-0.27744992
Q8K441	1.109138642	-0.832703468	-0.276435174
Q91XB0	1.108996291	-0.83305769	-0.275938601
Q9Z0W3	1.108989085	-0.833075602	-0.275913483
Q8C0K5	1.101951707	-0.849768134	-0.252183572
Q8JZK9	1.101820884	-0.850064339	-0.251756545
Q8C7K6	1.101309983	-0.851216534	-0.250093449
Q99LG4	1.101597224	-0.850569635	-0.251027589
Q9CXX9	1.103102565	-0.847141452	-0.255961113
Q9CQW1	1.103142673	-0.847049226	-0.256093447
Q9JKY7;Q8CIM7	1.10315531	-0.847020156	-0.256135154
P53668	1.102889329	-0.847631001	-0.255258328
A2ACQ1	1.102950876	-0.847489836	-0.255461039
Q8BYI8	1.102993083	-0.847392966	-0.255600117
O88845	1.10256035	-0.848383703	-0.254176646
Q7TQI3	1.10228483	-0.849011707	-0.253273123
P49282	1.102403901	-0.848740568	-0.253663333
Q8BYH8	1.102394141	-0.848762808	-0.253631334
Q9JM76	1.102391117	-0.848769699	-0.253621418
Q8R317	1.103548813	-0.846112669	-0.257436144
Q99J09	1.103512926	-0.84619562	-0.257317306
P63040	1.103742657	-0.845663959	-0.258078699
Q9JHI0	1.103786146	-0.845563139	-0.258223007
P59325	1.104364894	-0.844216068	-0.260148826
Q9Z239	1.103970535	-0.845135047	-0.258835488
P36993	1.104084084	-0.844870921	-0.259213163
P58389	1.104038445	-0.844977128	-0.259061317
Q8VEK0	1.104051652	-0.8449464	-0.259105251
P62311	1.10565434	-0.841178276	-0.264476064
Q925E7	1.105691444	-0.841090103	-0.26460134
Q9JHR7	1.105554212	-0.841416004	-0.264138208
O35604	1.105434889	-0.841698896	-0.263735994
Q9D1T5	1.105443387	-0.841678764	-0.263764623
P51410;A0A140T8T4	1.104825761	-0.843136165	-0.261689596
Q9D8W5	1.10510851	-0.842470426	-0.262638084
P61460	1.100492096	-0.853046082	-0.247446014
P70460	1.100536783	-0.85294659	-0.247590193
E9PUP1	1.100729008	-0.852518005	-0.248211002
Q3TX51	1.100910835	-0.852111679	-0.248799156
P98192	1.100099361	-0.853918151	-0.246181209
Q8K4Z0	1.100043686	-0.854041443	-0.246002243
Q8BVA5	1.099447965	-0.855355508	-0.244092456
Q9D0M5	1.099438348	-0.855376644	-0.244061704
P35441	1.099661738	-0.854885038	-0.244776701
Q3URS9	1.099824253	-0.854526571	-0.245297681
P12970	1.097917427	-0.85868923	-0.239228196
E9PYD1	1.097806846	-0.858927772	-0.238879074
Q91WG8	1.097853489	-0.858827193	-0.239026296
Q8VC57;Q8CEZ0	1.097421488	-0.859756654	-0.237664835
E9Q7L0	1.097170035	-0.860295517	-0.236874519
Q91W69	1.097220908	-0.860186624	-0.237034284
O55091	1.099012952	-0.856309179	-0.242703772
O88792	1.099120203	-0.856074513	-0.24304569
Q8BXL7	1.099203725	-0.855891558	-0.243312167
P42337	1.098747564	-0.856888566	-0.241858998
Q7TNG5	1.098439394	-0.857559077	-0.240880317
Q8R1F6	1.098495693	-0.857436765	-0.241058928
Q60675	1.09167289	-0.871701027	-0.219971864
P34022	1.090980209	-0.873089918	-0.217890291
Q8R2U4	1.090991725	-0.873066911	-0.217924815
Q9JHK4	1.092242652	-0.870550812	-0.22169184
Q61211	1.092382906	-0.870266584	-0.222116322
Q9CQR6	1.092435243	-0.87016041	-0.222274833
P29341;Q9D4E6;A2A5N3;Q8C7D3	1.092942497	-0.869128225	-0.223814272
Q8BMD6	1.09291164	-0.869191176	-0.223720464
Q8K341	1.09258985	-0.869846411	-0.222743439
Q811G0	1.092775588	-0.86946849	-0.223307097
Q8VCY6	1.092752181	-0.869516158	-0.223236023
Q62465	1.095816464	-0.863169564	-0.232646901
Q8C5K5	1.095879747	-0.863036185	-0.232843561
Q80UK8	1.096857474	-0.860963152	-0.235894322
Q99L48	1.096433919	-0.861864047	-0.234569872
P09671	1.094154861	-0.86663784	-0.227517021
Q3UH60	1.093844979	-0.867277561	-0.226567417
Q61686	1.093842272	-0.86728314	-0.226559132
P00158	1.093939263	-0.867083153	-0.226856111
Q9Z0Y9;Q60644	1.094022429	-0.866911501	-0.227110928
P80318	1.095184149	-0.864497045	-0.230687104
Q80VP1	1.095263481	-0.864331014	-0.230932467
Q8R1F1	1.094828922	-0.865238664	-0.229590258
Q9EQX4	1.09479501	-0.865309308	-0.229485702
Q61207	1.094680544	-0.865547564	-0.22913298
Q6P069	1.094641155	-0.865629477	-0.229011678
Q05816	1.123150751	-0.793737589	-0.329413162
Q8BYH7	1.122649577	-0.795297962	-0.327351614
Q3UFQ8	1.122725681	-0.795061973	-0.327663708
Q8R050	1.122721199	-0.795075878	-0.327645321
P54763;Q8CBF3;Q61772;P35991;O09127	1.121214358	-0.799686188	-0.32152817
Q63829	1.120955048	-0.800466763	-0.320488286
Q8R1X6	1.122129505	-0.796901625	-0.32522788
Q9CWU6	1.122436581	-0.795956636	-0.326479946
Q9R0Q7	1.122313344	-0.796336537	-0.325976807
Q8R180;Q8R2E9	1.121639147	-0.798399494	-0.323239653
P11930	1.121543706	-0.798689457	-0.32285425
Q9EQK7	1.121545056	-0.79868536	-0.322859696
P70697	1.121752968	-0.798053018	-0.32369995
Q8C052	1.121907635	-0.797581044	-0.32432659
Q9ERA6	1.123982245	-0.7911154	-0.332866846
Q99LI7	1.12372351	-0.791935884	-0.331787626
Q60864	1.123804459	-0.791679628	-0.332124831
Q8CDJ8	1.123799579	-0.791695089	-0.332104489
B1AR13	1.124278308	-0.79017142	-0.334106888
Q63810;Q63811	1.124466362	-0.789568946	-0.334897416
Q6GU68	1.124781322	-0.788554834	-0.336226488
P58069	1.124848422	-0.788337958	-0.336510464
Q5BL07	1.124858587	-0.788305078	-0.336553508
O08605	1.124655108	-0.788961987	-0.335693121
O88532	1.124590406	-0.78917031	-0.335420096
Q99L20	1.124551737	-0.789294684	-0.335257053
Q8BNU0	1.125241838	-0.787060453	-0.338181385
P26638	1.125510873	-0.786180942	-0.33932993
P54071	1.125710398	-0.785525528	-0.34018487
Q8BY71	1.125905384	-0.78488241	-0.341022973
Q8R3V5	1.125928041	-0.784807513	-0.341120528
Q9ESY9	1.126129624	-0.78413958	-0.341990043
Q9WV68	1.126232496	-0.783797633	-0.342434863
Q9CR61	1.126394385	-0.783258018	-0.343136367
Q9EPU0	1.126459088	-0.783041833	-0.343417255
P47753	1.126796311	-0.781910294	-0.344886017
Q8BYJ6	1.126683061	-0.782291204	-0.344391857
Q8R127	1.126600881	-0.78256704	-0.34403384
Q640R3	1.11668415	-0.812826618	-0.303857532
Q8VE19	1.116645831	-0.812933531	-0.3037123
Q8K224	1.118064779	-0.808929092	-0.309135688
Q9CQK7	1.117828152	-0.809603459	-0.308224693
Q9ES74	1.117937179	-0.809293076	-0.308644103
P0C7M9	1.11714309	-0.811540886	-0.305602205
Q80XE1	1.117290418	-0.811126082	-0.306164337
P97461	1.11743271	-0.810724498	-0.306708213
Q60872;Q3UTA4;Q3TQZ4;J3QP87;J3QNT6;A0A1Y7VK80;A0A1Y7VJE9;Q8BX20;J3QQ02;J3QPI8;A0A1Y7VNG9;A0A1Y7VLT7;F6YNI8;Q3UT53;J3QMW5	1.117508811	-0.810509333	-0.306999478
Q7TSG1	1.117691494	-0.809991707	-0.307699786
Q8BI72	1.117698299	-0.809972396	-0.307725903
Q8CHC4	1.117587341	-0.810287014	-0.307300327
Q8VDN2	1.117614933	-0.810208831	-0.307406102
P02802	1.11939854	-0.805076901	-0.314321639
Q9DB16	1.118842704	-0.806692969	-0.312149735
P51881	1.118982151	-0.806288987	-0.312693164
Q8K2Q7	1.119069133	-0.806036507	-0.313032626
Q99L27	1.119090407	-0.805974697	-0.31311571
Q80Y86	1.12044636	-0.801987456	-0.318458904
Q80XS6	1.120380248	-0.80218408	-0.318196168
Q9JI10	1.120356064	-0.802255948	-0.318100116
Q3SXD3	1.12004764	-0.80316979	-0.31687785
Q9CR76	1.119982312	-0.803362713	-0.316619599
P17879;Q61696	1.119683236	-0.804243108	-0.315440127
Q9D9M2	1.119796905	-0.803909043	-0.315887862
Q9JK92	1.119753186	-0.804037609	-0.315715577
Q8BFQ4	1.111515374	-0.826682363	-0.284833012
Q9Z1N5	1.111724608	-0.826142339	-0.285582268
P84244;P02301	1.112311059	-0.824619832	-0.287691227
Q9D7J4	1.112314629	-0.824610521	-0.287704109
Q8BLK9	1.112067073	-0.825254857	-0.286812216
Q9CQ02	1.112046626	-0.82530797	-0.286738656
P62141	1.1118618	-0.825787348	-0.286074452
Q9D1E8	1.111951544	-0.825554746	-0.286396798
Q3KNJ2	1.110853812	-0.828379019	-0.282474794
Q9WV95	1.110778408	-0.82857137	-0.282207039
Q3TWL2	1.111073423	-0.827817607	-0.283255816
Q9D8B4	1.111021206	-0.827951256	-0.283069951
Q9DB42	1.11097707	-0.828064144	-0.282912927
P61967	1.110147859	-0.830171726	-0.279976133
P97290	1.110134674	-0.830205037	-0.279929638
Q9JLJ2	1.110390282	-0.82955816	-0.280832121
P35802	1.110476644	-0.829339065	-0.281137579
Q9JMC8	1.110475526	-0.829341904	-0.281133622
Q9R0D8	1.113015348	-0.822773756	-0.290241592
Q7TT18	1.113675576	-0.821025284	-0.292650292
Q9WV60	1.113606724	-0.821208444	-0.29239828
P63216	1.115775052	-0.815345338	-0.300429714
Q04857	1.115357097	-0.816491047	-0.29886605
Q9JLV6	1.115364698	-0.816470279	-0.29889442
Q9Z2R6	1.115525274	-0.816030951	-0.299494323
P97315	1.115440262	-0.816263679	-0.299176582
Q8R570	1.11547309	-0.816173846	-0.299299245
O35638	1.114475613	-0.818882757	-0.295592856
Q8BHK1	1.11446471	-0.818912135	-0.295552575
Q9CQA3	1.114455671	-0.818936485	-0.295519186
Q03059	1.114998084	-0.817469146	-0.297528938
Q5DU57	1.114985637	-0.817502958	-0.297482679
Q8K354	1.114828439	-0.817929408	-0.296899032
Q8R104	1.114692117	-0.818298378	-0.296393739
Q9Z139	1.11473419	-0.818184588	-0.296549601
Q8CA71	1.082874116	-0.888622508	-0.194251608
Q3UN04	1.082244754	-0.889776531	-0.192468224
Q80VJ2	1.082437273	-0.88942427	-0.193013003
Q7TPD1	1.081376439	-0.891357219	-0.19001922
Q6P1B1;E9Q286	1.08117696	-0.891718494	-0.189458466
Q8CEE7	1.081126517	-0.89180974	-0.189316777
Q6ZQ82	1.081700465	-0.890768906	-0.190931559
P56382	1.081925037	-0.890360087	-0.19156495
Q07079	1.082012926	-0.89019985	-0.191813076
P25976	1.079833914	-0.894133047	-0.185700867
P53612	1.079827888	-0.894143811	-0.185684077
P14873	1.08005427	-0.893738996	-0.186315274
Q9JME5	1.080047896	-0.893750405	-0.186297491
Q9WVS7	1.08080065	-0.892398147	-0.188402503
Q91ZF0	1.080663039	-0.892646077	-0.188016962
Q3V0G7	1.080625922	-0.892712893	-0.187913029
Q8K4Z3	1.080616172	-0.892730442	-0.18788573
Q3ULJ0;Q6NXY9	1.080485567	-0.892965345	-0.187520222
Q8K2C9	1.080467444	-0.892997917	-0.187469527
O70325	1.080249333	-0.893389488	-0.186859845
P60824	1.080289274	-0.893317844	-0.18697143
Q9CY57	1.078182209	-0.897060856	-0.181121352
P27038	1.078504963	-0.896492293	-0.18201267
Q6PAC3	1.078521435	-0.896463232	-0.182058203
Q91VK1	1.078389573	-0.896695761	-0.181693812
Q9CQ80	1.078448675	-0.896591574	-0.181857102
Q6PGF3	1.078872207	-0.895843273	-0.183028934
Q8BK63	1.078755779	-0.896049274	-0.182706505
Q499E6	1.07931091	-0.895065036	-0.184245874
O88844	1.079123766	-0.895397411	-0.183726355
P58058	1.079215911	-0.895233831	-0.18398208
Q9JKD3	1.079188176	-0.895283082	-0.183905094
P70677	1.083345456	-0.887753596	-0.195591859
Q9CRC6	1.083430951	-0.887595558	-0.195835393
Q91V08	1.083597954	-0.887286467	-0.196311487
Q9DCN1	1.083549903	-0.887375452	-0.196174452
Q5FWI3	1.083525733	-0.887420196	-0.196105538
Q641K1	1.083516008	-0.887438197	-0.196077811
Q8BXA5	1.083509932	-0.887449441	-0.196060491
P18581	1.083800472	-0.886910965	-0.196889507
Q3TE80	1.083852436	-0.886814493	-0.197037943
Q9EPK6	1.083869363	-0.886783059	-0.197086304
P24270	1.083977201	-0.886582666	-0.197394535
Q8R5M8	1.084135612	-0.886287911	-0.197847701
Q80VL1	1.0845998	-0.885421533	-0.199178267
Q9D8U2	1.08479435	-0.885057231	-0.199737119
Q9JIA1	1.084956808	-0.884752481	-0.200204326
P16045	1.086069816	-0.88265126	-0.203418555
Q8JZQ9	1.085883219	-0.883005172	-0.202878047
Q9DC50	1.085927197	-0.88292182	-0.203005377
Q6NXI6	1.085184415	-0.884324689	-0.200859726
Q3TB82	1.085159529	-0.88437151	-0.20078802
Q62277	1.085135453	-0.884416797	-0.200718656
Q6URW6	1.085618967	-0.883505234	-0.202113732
Q8BIW1	1.085550876	-0.883633871	-0.201917006
Q9CZR3	1.08704732	-0.880786308	-0.206261012
Q8CJ40	1.086608275	-0.881626236	-0.20498204
Q9D902	1.086629031	-0.881586613	-0.205042418
Q9EQG9	1.087515246	-0.879886977	-0.207628269
P97348	1.088050941	-0.878852086	-0.209198855
Q80XC3	1.087837375	-0.87926535	-0.208572026
Q8CC12	1.087816644	-0.879305418	-0.208511226
Q9ES46	1.089907374	-0.875220907	-0.214686468
Q9QUK3	1.090126271	-0.874788075	-0.215338196
Q811I0	1.088383636	-0.878206481	-0.210177155
Q9D8E6	1.088611253	-0.877763503	-0.21084775
Q61735	1.088550813	-0.87788123	-0.210669583
Q91V09	1.088497742	-0.877984544	-0.210513198
Q9D8T0;P97805	1.088799611	-0.877396134	-0.211403477
Q8BZM1	1.088995887	-0.877012557	-0.21198333
Q91VM9	1.088906032	-0.877188256	-0.211717776
Q61037	1.089363397	-0.876292225	-0.213071172
Q8K4B0	1.089073933	-0.876859816	-0.212214117
Q9D0J4	1.089132124	-0.876745851	-0.212386273
Q9DCL9	1.089148759	-0.876713259	-0.2124355
Q8CJ19	1.058204938	-0.929292089	-0.12891285
O35344	1.058522847	-0.928819976	-0.12970287
Q8BGT8	1.058385669	-0.929023839	-0.12936183
Q80YA7	1.057303059	-0.930625012	-0.126678047
Q3TDN0	1.05771311	-0.930020153	-0.127692956
Q71KT5	1.057654085	-0.93010734	-0.127546746
Q8BHB4	1.057602256	-0.930183865	-0.127418391
Q3U0D9	1.059294485	-0.927669096	-0.131625389
Q8R2W9;Q8K4K6	1.05973234	-0.9270129	-0.13271944
Q8BU88	1.059491753	-0.927373741	-0.132118011
Q8VEK3	1.059462986	-0.927416841	-0.132046146
Q9CQY1	1.05958947	-0.927227266	-0.132362204
Q9DC70	1.059551446	-0.927284277	-0.132267169
Q64373	1.061006785	-0.925089824	-0.135916961
Q6P9R2	1.060835921	-0.925348791	-0.13548713
Q8K3J1	1.060825891	-0.925363983	-0.135461908
Q65CL1	1.060256447	-0.926224423	-0.134032024
Q8BVY0	1.060341297	-0.926096462	-0.134244835
Q61635;Q5NCB2;Q5SVP0;Q5NCB3	1.060634086	-0.925654242	-0.134979844
Q8BG39;Q69ZS6	1.060498831	-0.925858657	-0.134640174
Q9JHE7	1.060543452	-0.925791245	-0.134752207
O55131;Q9DA97	1.061629672	-0.924142727	-0.137486945
Q8R4E6	1.06152344	-0.924304588	-0.137218852
Q8R3H9	1.061914713	-0.923707732	-0.138206981
P19221	1.062255356	-0.923186562	-0.139068794
Q66T02	1.062276144	-0.923154712	-0.139121432
Q69ZF3	1.062522844	-0.922776306	-0.139746538
Q9DCH4	1.062521779	-0.922777941	-0.139743838
Q01339	1.06278313	-0.922376237	-0.140406894
Q80ZD8	1.062726166	-0.922463866	-0.1402623
P97390	1.063105972	-0.921878836	-0.141227137
Q9EQI5	1.063024777	-0.922004056	-0.141020721
Q5ND56	1.063298032	-0.921582307	-0.141715725
Q9D8N2	1.063323607	-0.921542785	-0.141780822
O08800	1.063528589	-0.921225724	-0.142302865
Q6ZQ93	1.063426695	-0.921383397	-0.142043298
Q60759	1.0639141	-0.920627979	-0.143286121
O08810	1.064528124	-0.919671993	-0.144856131
Q04447	1.064515663	-0.919691442	-0.144824222
P35282	1.064362151	-0.919930877	-0.144431274
Q3TZM9	1.06423784	-0.920124545	-0.144113294
Q99020	1.064961228	-0.918994762	-0.145966466
Q9D711	1.065994636	-0.917368983	-0.148625654
Q8BGV8	1.06567852	-0.917867789	-0.147810731
Q8K301	1.065421163	-0.91827291	-0.147148253
Q5SRX1	1.070759391	-0.909686715	-0.161072676
Q9Z110	1.070835434	-0.909561546	-0.161273888
A6H6A9	1.070975111	-0.909331418	-0.161643694
Q3UYG8	1.070948977	-0.909374496	-0.161574481
Q9Z2G6	1.070954487	-0.909365416	-0.161589071
P62835	1.071052499	-0.909203796	-0.161848702
Q8R0J7	1.071023128	-0.909252243	-0.161770885
Q8BP48	1.069633353	-0.911530584	-0.158102769
O09117	1.07040215	-0.910273639	-0.160128511
Q8K205	1.070515498	-0.910087612	-0.160427886
Q8BHB9	1.070270499	-0.910489474	-0.159781026
Q8K0D0;Q04899	1.070126381	-0.910725468	-0.159400912
P63005	1.068878479	-0.912756696	-0.156121782
Q3UHH1	1.06866092	-0.913108598	-0.155552322
Q9Z255	1.068660613	-0.913109095	-0.155551518
Q7TQI7	1.066753754	-0.91616575	-0.150588004
P97797;A0A0A6YYP6	1.066660101	-0.916314608	-0.150345493
Q8R3F9	1.066600736	-0.916408907	-0.150191828
Q9JHS4	1.067922337	-0.914298403	-0.153623934
P36552	1.068115403	-0.913988109	-0.154127295
Q9CQW2	1.068100421	-0.914012205	-0.154088216
P02798	1.067231316	-0.915404852	-0.151826463
Q99JW1	1.067197371	-0.915459037	-0.151738335
Q04207	1.06743473	-0.915079822	-0.152354908
Q80UU9	1.067544815	-0.914903686	-0.152641129
Q8CFE8	1.067558656	-0.914881529	-0.152677127
Q69ZF7	1.072603829	-0.906627136	-0.165976693
Q9CR39	1.07261724	-0.906604707	-0.166012534
Q8R1A4	1.072024297	-0.907593809	-0.164430488
P54751	1.072256879	-0.907206449	-0.16505043
Q5F259	1.072180917	-0.907333049	-0.164847867
Q7TQA1	1.072211396	-0.907282262	-0.164929134
Q8BK75	1.074036076	-0.904216732	-0.169819343
Q8C1Y8	1.073941512	-0.904376828	-0.169564684
Q80WV3	1.07383434	-0.904558105	-0.169276235
Q9DBL7	1.073696886	-0.904790351	-0.168906535
A6H6E9	1.073153916	-0.905704991	-0.167448925
Q68FD5	1.073252723	-0.905538877	-0.167713846
Q9CQP3	1.073424942	-0.905248996	-0.168175945
Q9JJT9	1.073526472	-0.905077891	-0.168448581
P35922	1.075505393	-0.901711639	-0.173793754
Q9QXS1;Q8R0W0	1.075176761	-0.902274821	-0.172901939
P46467;Q8BPY9	1.074487151	-0.903451197	-0.171035954
Q9JIK9	1.074520969	-0.903393678	-0.171127291
Q8CCN5	1.074921703	-0.902710765	-0.172210939
Q8VCT3	1.074857547	-0.902820262	-0.172037285
Q9JIW9	1.074809572	-0.902902102	-0.171907469
Q8BWW9	1.077088881	-0.898974263	-0.178114618
Q9D915	1.077462719	-0.898322191	-0.179140528
Q80XN0	1.076293671	-0.90035389	-0.175939781
Q8K370	1.076327877	-0.900294752	-0.176033125
Q9CTN4	1.076337256	-0.900278533	-0.176058723
Q6NVF9	1.076643925	-0.899747465	-0.17689646
Q8R016	1.076750028	-0.899563377	-0.177186651
O35621	1.026642063	-0.971037708	-0.055604354
Q99KE1	1.026591833	-0.971097081	-0.055494752
Q7TNV1	1.026467546	-0.971243907	-0.055223638
Q9CPV9	1.026331255	-0.971404775	-0.054926479
Q9WUM5	1.024999975	-0.972968541	-0.052031435
Q99K70;Q7TT45	1.025654761	-0.972201121	-0.05345364
P53810	1.025811823	-0.972016549	-0.053795274
P68433	1.025789329	-0.972042995	-0.053746334
Q8BIZ6	1.027560218	-0.969948937	-0.057611281
Q9CQS2	1.027291613	-0.97026814	-0.057023473
P24472	1.028355576	-0.969000399	-0.059355177
Q78HU3	1.028476993	-0.968855155	-0.059621838
Q9JM14	1.0280495	-0.969366017	-0.058683483
Q7TNS2	1.027819838	-0.969639866	-0.058179972
P70362	1.02787478	-0.969574392	-0.058300388
Q9EQJ0	1.027865	-0.969586049	-0.058278951
Q62446	1.028737129	-0.968543574	-0.060193555
Q8K358	1.029098909	-0.968109348	-0.060989561
Q925N2	1.028962569	-0.968273113	-0.060689456
Q9QXG2	1.029010232	-0.968215879	-0.060794353
Q8K409	1.029454043	-0.967682074	-0.061771969
P19253	1.029508598	-0.967616348	-0.06189225
Q02248	1.02949009	-0.967638648	-0.061851442
P70671	1.02977467	-0.967295443	-0.062479227
Q8BH98	1.02991291	-0.96712849	-0.06278442
Q8BZ20	1.030006153	-0.96701579	-0.062990362
Q9DBE8	1.030024012	-0.966994197	-0.063029815
E9PWQ3	1.020917874	-0.977679464	-0.04323841
Q5DQR4	1.020777428	-0.977839334	-0.042938094
A2A8Z1	1.020825579	-0.97778454	-0.04304104
Q8K1E0	1.020844811	-0.977762649	-0.043082162
O88343	1.020488001	-0.978168332	-0.042319669
Q9EPJ9	1.020090721	-0.978618931	-0.04147179
Q9JKC8	1.020237546	-0.978452535	-0.041785011
G3XA30	1.019063279	-0.979778941	-0.039284338
Q3U2C5	1.018981428	-0.979871025	-0.039110403
Q61263	1.018722674	-0.98016181	-0.038560864
Q8CI12	1.01880811	-0.980065851	-0.038742259
Q8BJW6	1.01969797	-0.979063262	-0.040634708
Q8HW98	1.019681835	-0.979081492	-0.040600344
Q9CWS4	1.019266638	-0.979549951	-0.039716687
Q9D7S9	1.019533101	-0.979249449	-0.040283652
Q9D8C6	1.019542202	-0.979239177	-0.040303025
A2AAE1	1.019467595	-0.97932337	-0.040144225
Q8BU14	1.019396038	-0.979404085	-0.039991952
P17047	1.023448618	-0.974773653	-0.048674965
Q78XF5	1.023930893	-0.974214453	-0.04971644
Q8VCS6	1.022246045	-0.976160405	-0.04608564
Q9CQX6;Q3UX61	1.022287069	-0.976113277	-0.046173793
P48755	1.021328264	-0.977211486	-0.044116778
O35350	1.021382449	-0.977149604	-0.044232845
P62915	1.021361304	-0.977173754	-0.04418755
Q9Z0H4	1.021366648	-0.977167651	-0.044198997
Q8R574	1.021508958	-0.977005041	-0.044503916
P51569	1.021629989	-0.976866627	-0.044763361
Q9WTN0	1.021670669	-0.97682008	-0.04485059
P61514	1.005841438	-0.994054358	-0.011787079
Q05CL8;A2AMD0;REV__Q9QZ47	1.00705404	-0.99279343	-0.01426061
P56379	1.006419691	-0.993454228	-0.012965462
Q68FF6	1.006501432	-0.993369223	-0.013132209
Q8BWM0	1.009976438	-0.989715664	-0.020260774
O55022	1.009786273	-0.989917633	-0.019868639
P28661	1.009608288	-0.99010645	-0.019501838
Q921Y4	1.009053242	-0.990693944	-0.018359297
Q8K406	1.00921094	-0.990527232	-0.018683707
Q8BKH7	1.009159268	-0.990581876	-0.018577393
Q9DCW2	1.009108641	-0.990635397	-0.018473245
P56959	1.008778869	-0.990983614	-0.017795255
Q9Z2L7	1.008572348	-0.991201325	-0.017371023
P58252	1.017831845	-0.981159241	-0.036672604
Q9QXX4	1.017279606	-0.981774723	-0.035504883
Q9Z2B2	1.017357045	-0.981688546	-0.035668498
Q8BHJ6	1.014754268	-0.984561932	-0.030192337
Q8BXJ9	1.015057909	-0.984229155	-0.030828754
P62482	1.016389306	-0.98276244	-0.033626866
Q8BJK1	1.015412895	-0.983839296	-0.0315736
A4FUQ5	1.015466831	-0.983779985	-0.031686846
P62889	1.015445824	-0.983803088	-0.031642735
E9Q4P1	1.015749374	-0.983468954	-0.03228042
Q7TPM9	1.016026474	-0.983163374	-0.0328631
Q8C033	1.015948175	-0.983249775	-0.032698399
Q3TIX9	1.013002701	-0.98646921	-0.026533491
O35598	1.013140493	-0.986319927	-0.026820566
P48722	1.013217993	-0.986235908	-0.026982084
P46460	1.013676025	-0.985738511	-0.027937514
Q5NCF2	1.014160662	-0.985210662	-0.02895
Q9DAV9	1.012335586	-0.987190138	-0.025145448
P52592	1.011966655	-0.98758754	-0.024379115
Q9D0V7	1.012082705	-0.987462632	-0.024620073
Q9CS42	1.010550549	-0.989104471	-0.021446078
Q9D958	1.011223269	-0.98838552	-0.022837749
Q9CPX7	1.039104918	-0.95566681	-0.083438108
P29416	1.03845713	-0.956498609	-0.081958521
Q08288	1.038505697	-0.956436377	-0.082069321
Q6DFW0	1.038850784	-0.955993584	-0.0828572
Q8C8R3;Q571B6	1.038685931	-0.956205247	-0.082480684
Q7TQK4	1.038222088	-0.956799486	-0.081422602
Q8K1X1	1.038068557	-0.956995753	-0.081072804
Q9QZM3	1.037981834	-0.957106523	-0.080875311
Q8CGF6	1.037562913	-0.957640661	-0.079922252
Q64726	1.037487297	-0.957736907	-0.079750391
Q9CYI0	1.03748116	-0.957744717	-0.079736444
P83093	1.037681737	-0.957489315	-0.080192422
I3ITR1;Q9D924	1.037772383	-0.957373775	-0.080398607
P08551	1.03783278	-0.957296751	-0.08053603
P0DP60	1.037829759	-0.957300604	-0.080529155
Q80SW1	1.040400429	-0.953991882	-0.086408546
P40240	1.04006685	-0.95442462	-0.08564223
Q60855	1.039760338	-0.954821348	-0.08493899
Q8VCX6	1.039885667	-0.954659235	-0.085226432
Q60760	1.041686665	-0.95231369	-0.089372975
Q8R0P4	1.041829634	-0.952126204	-0.08970343
Q7TPE5	1.041530195	-0.952518661	-0.089011534
Q9DB43	1.04131419	-0.952801247	-0.088512943
Q9JII5	1.041335642	-0.952773202	-0.08856244
Q6TEK5	1.042631755	-0.95107077	-0.091560985
Q6PAK3	1.042105886	-0.951763393	-0.090342492
Q9CRA5	1.042335355	-0.95146148	-0.090873875
Q9CRY7	1.042256828	-0.951564853	-0.090691975
Q9R1Q9	1.042218365	-0.951615465	-0.0906029
P61211	1.031336175	-0.965400531	-0.065935643
Q68FG3	1.031548918	-0.965140815	-0.066408104
P63213	1.031599745	-0.965078711	-0.066521034
Q6PCN3	1.031623937	-0.965049144	-0.066574793
O35864	1.030587055	-0.966312087	-0.064274968
Q6P9Q4	1.030618718	-0.966273652	-0.064345066
O88947	1.030891753	-0.965941875	-0.064949878
Q8BGZ4	1.031094405	-0.965695229	-0.065399176
O54992	1.032815799	-0.963586436	-0.069229363
Q99MR3	1.032781839	-0.963628278	-0.069153561
Q8BQS5	1.033116484	-0.963215546	-0.069900938
Q8BM86	1.033225298	-0.963081139	-0.07014416
Q91ZN5	1.0332426	-0.963059758	-0.070182843
Q99PV0	1.033236513	-0.963067281	-0.070169232
Q9WTU0;Q80TJ7	1.032307103	-0.964212179	-0.068094924
Q3UNZ8	1.032388988	-0.964111599	-0.068277389
Q9ESN6	1.032356432	-0.964151594	-0.068204838
Q60996	1.031952604	-0.964646969	-0.067305635
Q6PD26	1.031830488	-0.964796502	-0.067033986
Q9EP82	1.031823204	-0.964805417	-0.067017787
Q61990	1.03377279	-0.962403358	-0.071369432
Q5XF89	1.033947258	-0.962186837	-0.07176042
Q8VDU5	1.033954459	-0.962177895	-0.071776565
[truncated: 77 more rows]
