# Supplementary material for: Investigation of the Hydrogen Sulfide Signaling Pathway in Schwann Cells during Peripheral Nerve Degeneration: Multi-Omics Approaches
Source: Antioxidants (Basel). 2022 Aug 19;11(8):1606. doi: 10.3390/antiox11081606 (PMC9405209; doi:10.3390/antiox11081606)
Supplement: Supplementary file 1 [file antioxidants-11-01606-s001.zip › Proteomics clustering-Cluster 3.txt]

GeneID	Control	X1DAY	X1DAY.NEM
B1AQ85;Q3UUY3;B1AQA9	0.816496581	0.816496581	0.816496581
B1ARW8	0.816496581	0.816496581	0.816496581
E9Q6H8	-0.058232549	-0.96961128	1.027843829
O35239	-0.05421185	-0.97179137	1.02600322
Q3UHI0	-0.055852779	-0.970903101	1.026755879
P70245	-0.044180077	-0.977177739	1.021357816
O08648	-0.045704978	-0.97636385	1.022068827
Q99NH0	-0.045640447	-0.976398327	1.022038774
Q5F2E8	-0.050116811	-0.973999265	1.024116076
Q922B1	-0.051865683	-0.973057881	1.024923564
Q9D5J6	-0.051848194	-0.973067306	1.0249155
Q64327	-0.062679088	-0.967186118	1.029865207
Q8CHG7	-0.063836208	-0.966552579	1.030388786
Q8CAK1	-0.069358763	-0.963514999	1.032873762
Q99JR5	-0.069707976	-0.963322148	1.033030124
P12367	-0.067833575	-0.964356199	1.032189773
Q3UYC0;Q149T7	-0.066175326	-0.965268796	1.031444122
Q8C7X2	-0.066180904	-0.96526573	1.031446634
Q8BXL9	-0.081872122	-0.95654713	1.038419252
Q9D358	-0.085214326	-0.954666064	1.03988039
Q64685	-0.083917019	-0.95539722	1.039314239
Q9D2R0	-0.083671434	-0.955535487	1.039206921
Q61234	-0.077366151	-0.959069829	1.03643598
Q00493	-0.079647574	-0.957794476	1.03744205
Q3TQI7	-0.079545574	-0.957851579	1.037397153
Q80XR2	-0.072962306	-0.961520538	1.034482845
Q62191	-0.074608482	-0.960606166	1.035214648
Q8R0I0	-0.075780655	-0.959953833	1.035734488
O35963	-0.131848863	-0.927535134	1.059383997
P03893	-0.131821599	-0.927551479	1.059373078
Q6PB66	-0.133681213	-0.926435287	1.0601165
P06869	-0.133936575	-0.926281805	1.060218379
Q61830	-0.134049903	-0.926213674	1.060263577
P50543	-0.140063809	-0.922584132	1.062647942
Q8VCW8	-0.138998849	-0.923228882	1.062227731
Q5SSH7	-0.135556172	-0.925307204	1.060863376
Q8BZ00	-0.137224228	-0.924301343	1.061525571
Q61081;REV__O35245	-0.128647927	-0.929450298	1.058098225
O88441	-0.128522672	-0.929525081	1.058047753
Q9QXC1	-0.128458626	-0.929563314	1.05802194
P56873	-0.125587836	-0.931273872	1.056861708
Q69ZX6	-0.126723993	-0.930597647	1.05732164
Q80YQ8	-0.121298003	-0.93381824	1.055116244
P27773	-0.12033779	-0.934385835	1.054723626
Q80Y24	-0.120714087	-0.934163485	1.054877572
E9PXF8	-0.123578879	-0.932467165	1.056046044
Q6DFW5	-0.123290263	-0.932638346	1.055928609
Q8BLE7	-0.123156054	-0.932717925	1.055873979
O35609	-0.1247854	-0.931750878	1.056536278
Q8BK35	-0.124291201	-0.932044408	1.056335609
P63013;Q06348	-0.117840763	-0.935858572	1.053699335
Q8K386	-0.115613004	-0.937168485	1.052781489
Q9Z2V6	-0.114674733	-0.937719053	1.052393787
P27659;E9PWZ3	-0.112391731	-0.939055899	1.05144763
O89051	-0.108055897	-0.941583895	1.049639792
Q91XF0	-0.107599437	-0.941849201	1.049448638
Q8CIV2	-0.108971909	-0.941051007	1.050022916
Q91YT7	-0.110151476	-0.940363858	1.050515334
P97864	-0.095935053	-0.948575172	1.044510225
Q61702	-0.094789975	-0.949229889	1.044019865
Q8VH51	-0.093782979	-0.949804836	1.043587815
P61255	-0.08814668	-0.953008714	1.041155394
Q9DCF9	-0.090144821	-0.951875649	1.04202047
Q71FD5	-0.091639994	-0.95102582	1.042665814
P20357	-0.090920689	-0.951434871	1.04235556
P70160	-0.090980338	-0.951400965	1.042381303
Q91VK4	-0.105871064	-0.942852341	1.048723405
O54734	-0.104395001	-0.943707246	1.048102246
Q8R3P6	-0.104039498	-0.943912898	1.047952396
O88704	-0.099114412	-0.946752109	1.04586652
Q3TFQ1	-0.098060672	-0.947357178	1.04541785
Q8VCL2	-0.100770172	-0.94579965	1.046569823
Q61768	-0.101911984	-0.945141624	1.047053608
Q62313;Q62314	-0.102188979	-0.944981842	1.047170822
Q91YQ1	-0.014527359	-0.992657176	1.007184535
Q923B6	-0.013873718	-0.992990958	1.006864676
P08101	-0.016592575	-0.991600465	1.008193039
Q9D0D3	-0.019296808	-0.990211949	1.009508757
Q3U487	-0.036307557	-0.98135176	1.017659317
Q8R1V4	-0.037193739	-0.980884231	1.018077969
Q3UM29	-0.031557107	-0.983847933	1.01540504
Q5FWH2	-0.029250931	-0.985053627	1.014304557
Q91VJ4	-0.027694945	-0.985864857	1.013559802
Q9D772	-0.028266355	-0.985567157	1.013833513
Q8BHC1	-0.022317509	-0.988654451	1.01097196
P18406	-0.026651901	-0.986407643	1.013059543
Q9D061	-0.024519841	-0.987514595	1.012034437
P70451;REV__P51855	0.022623734	-1.011119911	0.988496177
Q9D8N0	0.022569076	-1.011093508	0.988524433
Q69Z37	0.020125847	-1.009911018	0.989785171
Q924H7	0.018910541	-1.009321158	0.990410617
Q9CZP7	0.009411316	-1.004672443	0.995261127
Q99JP7	0.010695006	-1.005304608	0.994609602
Q9QXE0	0.010583419	-1.005249705	0.994666286
Q99N94	0.011542624	-1.005721349	0.994178725
Q9CQ21	0.011132836	-1.005519939	0.994387104
O55026	0.01687764	-1.008331994	0.991454354
O70152	0.016223272	-1.008012933	0.991789661
Q80UP5	0.016266491	-1.008034016	0.991767525
Q9D1H7	0.013174911	-1.006522362	0.99334745
P04627	0.014138431	-1.006994252	0.992855821
Q9JIF7	0.015094289	-1.007461702	0.992367413
Q9JKW0	0.015088693	-1.007458967	0.992370274
Q91X72	0.002610782	-1.001302835	0.998692053
Q8CB44	0.004972829	-1.002477141	0.997504312
Q9D0M3	0.003843152	-1.001916037	0.998072885
Q8BFU3	-0.009397973	-0.995267892	1.004665865
Q9CWD8	-0.009119527	-0.995409049	1.004528576
Q9QYC7	-0.00890252	-0.995519019	1.004421539
O35887	-0.000123207	-0.999938391	1.000061598
O08734	-0.002546207	-0.998724466	1.001270672
Q9BCZ4	-0.003984186	-0.998001954	1.00198614
Q61210	-0.004475035	-0.997754973	1.002230008
Q61334	-0.004583476	-0.997700384	1.00228386
Q3ULW8	0.085821767	-1.040145043	0.954323275
O08547	0.08871683	-1.041402543	0.952685713
Q05186	0.08826978	-1.041208776	0.952938996
Q9CQE7	0.078216295	-1.036811339	0.958595044
Q8VDP2	0.081753616	-1.038367289	0.956613673
Q8BZ60	0.082666805	-1.038767435	0.95610063
Q8R5I6	0.082404565	-1.03865259	0.956248025
Q8R5L3	0.105104186	-1.048400893	0.943296707
Q9D287	0.106931428	-1.049168608	0.94223718
P49182	0.106672173	-1.049059836	0.942387663
Q9QZ88	0.106652759	-1.049051689	0.94239893
P97863	0.11086275	-1.050811749	0.939948998
Q8BUV8	0.110489918	-1.050656423	0.940166506
T1NXB5	0.109551076	-1.050264825	0.940713749
Q8BL86	0.108741993	-1.049926813	0.94118482
Q8CHI8	0.109144674	-1.050095104	0.94095043
Q9CR30	0.102872734	-1.047459911	0.944587177
P58681	0.102440505	-1.047277207	0.944836702
Q3TTA7	0.102438043	-1.047276166	0.944838123
Q69ZS8	0.101426486	-1.046848024	0.945421537
Q9CWP6	0.101005438	-1.046669586	0.945664147
P32020	0.099642317	-1.04609098	0.946448662
P55096	0.10039336	-1.046409951	0.94601659
Q8BMI0	0.091689339	-1.042687084	0.950997745
E9Q612	0.092763338	-1.043149557	0.950386219
P43277	0.093644443	-1.043528316	0.949883873
Q9CYC6	0.095711347	-1.044414504	0.948703157
Q8VDV3	0.098709577	-1.045694246	0.946984669
B1AY13	0.097808192	-1.045310222	0.94750203
Q8R5A0	0.097949453	-1.045370445	0.947420992
Q8BL80	0.073064567	-1.034528364	0.961463797
Q920Q8	0.071116883	-1.033660035	0.962543153
Q61937	0.071416374	-1.033793743	0.962377368
Q8BJF9	0.071518981	-1.033839536	0.962320554
Q91VS7	0.067871677	-1.032206882	0.964335205
Q4V9W2	0.067615013	-1.032091613	0.9644766
Q9D7N9	0.067666588	-1.03211478	0.964448192
Q61733	0.070289894	-1.033290476	0.963000583
Q9D855	0.069443217	-1.032911585	0.963468368
Q571E4	0.064000037	-1.030462835	0.966462798
Q8VHI3	0.062596404	-1.029827755	0.967231351
O35345	0.056019218	-1.026832109	0.97081289
Q9D883;Q8BGJ9	0.055609964	-1.026644633	0.971034669
A2AJI0	0.058607905	-1.02801504	0.969407134
Q6NZC7	0.060605037	-1.028924205	0.968319168
Q6ZQL4	0.060664631	-1.028951288	0.968286657
Q61559	0.052689882	-1.025303315	0.972613432
P49962	0.050784781	-1.024424762	0.973639981
Q9ES97	0.051272736	-1.024650047	0.97337731
Q69Z99	0.048970381	-1.023585499	0.974615118
P18654	0.046215851	-1.02230664	0.976090789
Q9Z1M7	0.046894392	-1.022622199	0.975727807
A2AWA9	0.04432749	-1.021426626	0.977099136
P58742	0.043098135	-1.020852282	0.977754146
Q6P5D4	0.042765491	-1.020696678	0.977931186
Q9D8Z1	0.041422961	-1.020067825	0.978644864
Q9WUU9	0.042015385	-1.020345488	0.978330104
P01837	0.039312683	-1.019076616	0.979763933
P17141	0.039136957	-1.018993925	0.979856968
Q99PT9	0.040757208	-1.019755478	0.978998271
Q9CQD1	0.040259355	-1.019521687	0.979262332
Q8BSE0	0.040048173	-1.01942246	0.979374286
Q9Z1N6	0.040018138	-1.019408344	0.979390206
A2AMM0	0.035982408	-1.017505561	0.981523153
P45952	0.036836548	-1.017909295	0.981072747
Q99LW6;Q8CCI5	0.030812334	-1.015050079	0.984237744
Q9ESC8	0.033026607	-1.016104186	0.983077579
Q8R361	0.033832302	-1.016486825	0.982654522
Q8BR65	0.033399637	-1.016281405	0.982881768
Q8K2C8	0.033475917	-1.016317631	0.982841714
Q3TEA8	0.221119106	-1.092053188	0.870934082
E9Q9B7	0.225309678	-1.093433439	0.868123761
P20060	0.225142765	-1.093378729	0.868235965
O70503	0.22602405	-1.09366734	0.86764329
Q9R0I7	0.226269583	-1.093747639	0.867478056
Q8K4Q8	0.215254275	-1.090098103	0.874843828
F8VQC1	0.214043582	-1.089691119	0.875647538
Q80U38	0.213046301	-1.089355006	0.876308704
Q91YJ5	0.208125852	-1.087685172	0.87955932
Q9DCE9	0.205468822	-1.086775529	0.881306707
Q68ED7	0.203701172	-1.08616729	0.882466118
Q9DBG7	0.204182201	-1.086333053	0.882150852
P29037	0.177230291	-1.076765978	0.899535687
Q6DFZ1	0.179413412	-1.07756202	0.898148608
Q9WU60	0.178479055	-1.077221774	0.89874272
Q8K1M6	0.18238348	-1.078639055	0.896255575
Q60610	0.184456151	-1.079386597	0.894930446
Q7TPQ3	0.185336537	-1.079703109	0.894366572
Q7TSF4	0.185810649	-1.079873309	0.89406266
Q80UG2;P70207	0.193528925	-1.082619379	0.889090454
Q76N33	0.192869225	-1.082386486	0.889517261
Q8VEL0	0.192984906	-1.082427349	0.889442443
Q6PDQ2;A2A8L1;B1AR17	0.189065317	-1.081036956	0.891971639
Q8C4V1	0.19070715	-1.081620825	0.890913674
Q91WD4	0.190937356	-1.081702522	0.890765166
Q8VD00	0.199659982	-1.084767511	0.88510753
P48024;Q9CXU9	0.200758801	-1.085149388	0.884390587
Q3V209	0.200841815	-1.0851782	0.884336384
Q8C3X4	0.195907716	-1.083456331	0.887548616
Q99P88	0.196006149	-1.083490869	0.887484719
Q99N50	0.198059108	-1.084209458	0.886150349
Q9R0P4	0.198543985	-1.084378695	0.88583471
Q6PAQ4	0.139412312	-1.062390978	0.922978666
Q9R0Q3	0.139451879	-1.062406593	0.922954714
Q8K1L5	0.130434406	-1.058816795	0.928382389
Q8R0F8	0.131197245	-1.059122886	0.927925641
Q9JI39	0.134199499	-1.060323224	0.926123725
Q8BQZ4	0.132675645	-1.05971483	0.927039185
Q9JHR9	0.133356676	-1.059986949	0.926630274
P57791	0.117160491	-1.053419461	0.93625897
D3YZZ5	0.126793746	-1.057349844	0.930556099
Q8BG32	0.123947948	-1.056196122	0.932248174
L7N466;Q9D110	0.121579041	-1.055231023	0.933651982
Q64378	0.122543768	-1.055624572	0.933080804
P98200	0.154216187	-1.068149478	0.913933291
A2AWP8	0.153798593	-1.06798935	0.914190757
O08663	0.153904187	-1.068029853	0.914125666
Q80Z10	0.151216863	-1.066996395	0.915779533
Q9DCV4	0.15243403	-1.067465168	0.915031137
Q9QYR6	0.148823615	-1.06607135	0.917247735
Q03145;P29319	0.147672234	-1.065624746	0.917952511
Q8CE64	0.147730612	-1.065647414	0.917916802
P54754	0.144104125	-1.064234254	0.920130129
P97321	0.145639737	-1.064833881	0.919194143
Q8CCJ3	0.144980627	-1.064576733	0.919596106
P48999	0.169829939	-1.074040009	0.90421007
Q8BJ71	0.169370601	-1.073869408	0.904498808
Q8K4J6	0.173635785	-1.075447227	0.901811442
Q8VE47	0.173443416	-1.075376368	0.901932952
Q9R061	0.17326832	-1.075311846	0.902043526
Q810B6	0.172068398	-1.074869044	0.902800646
Q9EPL9	0.172509961	-1.075032122	0.90252216
P61963	0.166789294	-1.072907658	0.906118364
O08677;Q6S9I3	0.163924935	-1.07183441	0.907909475
Q9CZR2	0.164976026	-1.072228981	0.907252955
B1AY10	0.16157346	-1.070948592	0.909375132
Q923T9	0.16285299	-1.07143113	0.90857814
Q91ZU6	0.159965393	-1.070340361	0.910374969
Q9D2N4	0.157852566	-1.069538178	0.911685612
Q640L3	0.398459529	-1.137804483	0.739344954
E9Q7T7	0.399415839	-1.137977732	0.738561893
Q9EP69	0.398970771	-1.137897205	0.738926434
P41234	0.394420643	-1.137063644	0.742643001
Q9CWS0	0.3952815	-1.137222786	0.741941285
Q80W49	0.391089231	-1.13644148	0.745352249
Q9ESJ4	0.393057966	-1.136810365	0.743752398
Q99LQ7	0.391961825	-1.13660541	0.744643586
Q9CQZ1	0.392220807	-1.136653932	0.744433125
Q8C170	0.410402641	-1.139908362	0.729505722
Q9QY93	0.410956024	-1.140002682	0.729046659
O35074	0.408685559	-1.139613909	0.73092835
Q99104;P21271	0.40963584	-1.139777202	0.730141362
Q9QZQ8	0.409629776	-1.139776163	0.730146386
Q6ZQM8	0.409293536	-1.139718477	0.730424941
Q8BFW4	0.409270159	-1.139714463	0.730444304
Q9ESE1	0.406955338	-1.139314468	0.73235913
Q3UPH1	0.404952994	-1.138964513	0.734011519
Q6P1G0	0.404351435	-1.138858662	0.734507227
Q920Q4	0.414214619	-1.140552373	0.726337755
P97363	0.415185413	-1.140714245	0.725528831
Q6P549;Q9ES52	0.415749736	-1.14080794	0.725058205
Q8BKT8	0.41872979	-1.141297844	0.722568054
A0A286YCX6	0.418249336	-1.141219416	0.72297008
P60605	0.417933817	-1.141167795	0.723233979
Q8K201	0.421468479	-1.141740814	0.720272334
O35623	0.420110675	-1.141522066	0.721411391
P42227	0.419745217	-1.141462896	0.72171768
O54754	0.429091127	-1.14293697	0.713845843
P58196	0.428326296	-1.142819402	0.714493106
Q8K2K6	0.42843738	-1.142836512	0.714399132
Q9Z2A9	0.425989109	-1.142456743	0.716467634
Q6NV83	0.425025784	-1.142305779	0.717279994
Q99LH2	0.425146924	-1.14232481	0.717177886
Q9R099	0.430688616	-1.143180763	0.712492147
Q8BS95	0.432987815	-1.143527437	0.710539622
Q8VD31	0.431960208	-1.143373108	0.7114129
Q99LI8	0.43244595	-1.143446182	0.711000231
P16675	0.438450127	-1.144331065	0.705880938
Q61144	0.438452685	-1.144331435	0.70587875
B2RXZ2;P56593	0.435461361	-1.143894841	0.70843348
P56376	0.43479749	-1.1437968	0.708999311
Q4PJX1	0.447175767	-1.145556091	0.698380323
P61620;Q9JLR1	0.44795845	-1.145662425	0.697703974
Q61387	0.448127526	-1.145685318	0.697557792
Q7TNC9	0.444253641	-1.14515392	0.700900279
Q8BYN5	0.441307042	-1.144740135	0.703433094
Q3UMR0	0.442591675	-1.14492155	0.702329875
O88413;P50586	0.442005642	-1.144838986	0.702833344
B2RXC1	0.442310289	-1.144881947	0.702571658
Q7TNL5	0.442240855	-1.144872163	0.702631308
D3Z3Y1	0.457903325	-1.146962234	0.689058909
O88485	0.458286099	-1.147010354	0.688724255
Q80V94	0.460070722	-1.14723283	0.687162109
P12960	0.459775836	-1.147196283	0.687420446
Q9WU00	0.459510364	-1.147163308	0.687652944
Q923S9	0.453834136	-1.146441909	0.692607773
Q9CYL5	0.453959633	-1.146458195	0.692498562
P68181	0.454662467	-1.146549124	0.691886658
Q8BMS1	0.454219062	-1.146491814	0.692272752
P46414	0.454420916	-1.146517927	0.692097012
Q8K1R7	0.454370811	-1.146511449	0.692140638
Q8BIH0	0.452072273	-1.14621166	0.694139388
E9Q271	0.44985349	-1.14591745	0.69606396
P80314	0.450904686	-1.146057428	0.695152742
Q921L5	0.45079823	-1.146043301	0.695245071
Q3UHJ0	0.270869518	-1.107531605	0.836662087
Q61097	0.272445971	-1.107989364	0.835543393
P49117	0.275973605	-1.109006332	0.833032727
Q3UGR5	0.278360144	-1.109688559	0.831328415
Q80X71	0.27815293	-1.109629509	0.831476579
E9Q8I7;Q80SZ6	0.280228192	-1.110219307	0.829991115
Q8BLK3	0.280476714	-1.110289701	0.829812987
P70227	0.282932942	-1.110982697	0.828049755
Q8K083;Q14DI0;A0A087WPN2;A0A0J9YUW3;A0A0U1RPC5;Q3TFZ4;E9QAH2;B8JJZ4;Q8BZ89;P46684;Q62521;Q3UZD5;Q7TQ40;Q7TSI0	0.283091781	-1.111027341	0.82793556
Q6PAM0	0.286626192	-1.112015357	0.825389164
Q7TT15	0.284843411	-1.111518281	0.826674871
Q9DCS1	0.294361147	-1.114141605	0.819780458
A2AN08	0.29122588	-1.113285723	0.822059843
Q8VE97	0.291452441	-1.113347844	0.821895403
B2RX12	0.288613504	-1.112566368	0.823952864
Q91VR7	0.289757822	-1.112882167	0.823124345
O88697	0.290055294	-1.112964083	0.82290879
Q91Z69	0.290245807	-1.113016507	0.822770701
Q3UMY5	0.241267919	-1.098561535	0.857293616
Q9R1V6	0.240664396	-1.098371301	0.857706905
Q99LC8	0.246366285	-1.100156909	0.853790624
P08074	0.243507446	-1.099264896	0.85575745
Q8C0D4	0.243927377	-1.099396334	0.855468957
Q9DCE5	0.231983001	-1.095602605	0.863619604
Q8K1A6	0.235093596	-1.096601572	0.861507976
O35129	0.23473493	-1.096486781	0.861751851
Q6ZQ58	0.234796888	-1.096506618	0.86170973
Q3TJZ6	0.237830505	-1.097474136	0.859643631
P60710;Q8BFZ3	0.237000921	-1.097210286	0.860209365
P70399	0.237292866	-1.097303202	0.860010336
Q925N0	0.237504536	-1.097370527	0.859865991
Q9WTI7	0.249134991	-1.101014533	0.851879542
Q4VBE8	0.250107561	-1.101314328	0.851206766
Q56A08	0.250891145	-1.101555313	0.850664168
Q8BGP6	0.250741984	-1.101509478	0.850767494
Q9D809	0.250802318	-1.10152802	0.850725702
P63254	0.253645136	-1.102398351	0.848753215
Q9DCU6	0.253153844	-1.102248408	0.849094564
Q9JLI8	0.25299231	-1.102199065	0.849206755
Q791T5	0.254456702	-1.102645616	0.848188913
Q9Z1F9	0.255391038	-1.102929626	0.847538588
Q8BND5	0.259918395	-1.104295803	0.844377408
Q921L3	0.2605311	-1.104479417	0.843948317
Q91WC0	0.258692509	-1.103927518	0.845235009
Q5I1X5	0.257134161	-1.103457596	0.846323435
Q9R0N3	0.257718206	-1.103633946	0.84591574
Q640P4	0.262570682	-1.105088441	0.842517759
Q91X97	0.263969502	-1.105504179	0.841534677
O54724	0.267712107	-1.106608679	0.838896572
P27046	0.265129108	-1.105847615	0.840718507
Q8CCP0	0.266136457	-1.10614507	0.840008613
Q99MD6	0.336025651	-1.124733825	0.788708174
O54833	0.334319118	-1.124328847	0.790009729
P14602	0.335159765	-1.124528653	0.789368888
Q62469	0.332465212	-1.123886073	0.79142086
Q8BZY3	0.330257138	-1.123354882	0.793097744
Q920L1	0.330338234	-1.123374465	0.793036231
A9XX86	0.324798559	-1.122023905	0.797225346
Q8VCD6	0.326800513	-1.122514988	0.795714475
Q9ERL0	0.320473599	-1.120951379	0.800477781
P28665;P28666;A0A0N4SVU1	0.320993807	-1.121081221	0.800087414
Q3TL44	0.321284062	-1.121153568	0.799869507
P63011	0.32363764	-1.121737571	0.798099931
Q60611;Q8VI24	0.32271833	-1.121510018	0.798791687
A2ALU4;Q1W617	0.299845288	-1.115619078	0.81577379
Q8R366	0.304698187	-1.116905604	0.812207416
Q9JLJ5	0.302595656	-1.116350625	0.813754969
Q3TDN2	0.316969422	-1.120070791	0.803101369
Q99KW9	0.317703341	-1.120256081	0.80255274
O89116	0.310583359	-1.118439375	0.807856016
P26883	0.312966891	-1.119052297	0.806085406
Q00724	0.312643539	-1.118969427	0.806325889
P46097	0.340373076	-1.125754237	0.785381161
Q8BLN5	0.342275138	-1.126195576	0.783920438
Q9JKP5;Q8C181;Q8R003	0.342877755	-1.126334753	0.783456998
Q9EPR5	0.342697188	-1.126293083	0.783595896
Q80U49	0.346168477	-1.127089238	0.780920761
Q9EP89	0.347181339	-1.127319582	0.780138243
Q3UHQ6	0.344913497	-1.126802603	0.781889106
Q9R078	0.343883428	-1.126566321	0.782682894
Q9JIG8	0.360160925	-1.130192604	0.770031679
P62806	0.361542826	-1.130489839	0.768947013
Q9DCX1	0.362321319	-1.13065655	0.768335231
Q8C129	0.356589646	-1.129416723	0.772827076
Q8C1A3	0.35632216	-1.129358162	0.773036002
Q8C6B9	0.354200306	-1.128891415	0.77469111
P20352	0.355109718	-1.12909194	0.773982221
P43025	0.354743428	-1.12901126	0.774267832
Q8C547	0.352368701	-1.128485366	0.776116665
Q3KNM2	0.349284399	-1.127795024	0.778510625
Q8C025	0.34995572	-1.127945984	0.777990264
Q99KR7	0.373534485	-1.132998711	0.759464226
Q8VCM7	0.371741295	-1.132631603	0.760890308
Q920N2	0.370747155	-1.132426855	0.7616797
Q9D023	0.370543114	-1.132384724	0.76184161
P56371	0.368690465	-1.1320005	0.763310035
A2A6T1	0.368040817	-1.131865052	0.763824234
P24668	0.368337721	-1.131927001	0.76358928
Q6PHQ9	0.365612838	-1.131355542	0.765742704
Q8N9S3	0.366670737	-1.131578179	0.764907442
Q9WVD4	0.367405648	-1.131732263	0.764326615
P70663	0.386293786	-1.135528362	0.749234576
Q924N4	0.385426004	-1.13536092	0.749934916
Q8BZ21;Q8BRB7	0.387227838	-1.135707837	0.748479999
Q8K4G5	0.388734405	-1.135995671	0.747261265
Q8VEE4	0.388824831	-1.136012882	0.747188051
Q3TPX4	0.375440026	-1.133385699	0.757945673
Q9ER65	0.375319564	-1.13336133	0.758041766
Q8K0C9	0.377143422	-1.133728909	0.756585487
Q8VE22	0.376367488	-1.133572889	0.757205401
Q9DCH6	0.376155333	-1.133530137	0.757374804
Q920A5	0.381547263	-1.134604265	0.753057002
Q8BL65;Q69ZX8	0.379979177	-1.134294554	0.754315378
Q9ERV1	0.378747164	-1.134049685	0.755302521
Q8VD65	-0.309124825	-0.808937137	1.118061962
Q6PR54	-0.308894661	-0.809107581	1.118002241
Q9D8X2	-0.308686707	-0.809261538	1.117948245
P0DOV2	-0.306226818	-0.81107996	1.117306777
Q61103	-0.306767771	-0.810680506	1.117448277
Q3UH66;Q80XP9	-0.302682118	-0.813691403	1.11637352
Q7TQG1	-0.304054769	-0.812681392	1.116736161
Q8BWG9	-0.304156194	-0.8126067	1.116762894
Q5SV85	-0.298362616	-0.816859484	1.1152221
Q8VEB1	-0.301365354	-0.814658813	1.116024167
Q9CQS4	-0.301035714	-0.814900769	1.115936483
Q8BKE6	-0.281940941	-0.828762472	1.110703413
Q8JZM7	-0.281636455	-0.828981071	1.110617527
P35569	-0.277901967	-0.831655978	1.109557944
Q80TV8	-0.278262192	-0.831398457	1.10966065
B2RY56	-0.295806827	-0.818726682	1.114533509
Q9Z2D1	-0.295893205	-0.818663664	1.11455687
Q99MN1	-0.294655056	-0.819566364	1.11422142
P16014	-0.295201401	-0.819168196	1.114369597
Q6PDI5	-0.29513574	-0.819216062	1.114351802
Q6P542	-0.29098447	-0.822235014	1.113219484
Q8R3L5	-0.290687454	-0.822450467	1.113137922
Q8BYN3	-0.287305225	-0.82489877	1.112203995
Q8R3F5	-0.286691229	-0.825342212	1.11203344
Q8VC98	-0.286674831	-0.825354051	1.112028881
Q924S8;Q924S7	-0.258146905	-0.845616309	1.103763214
O35166	-0.257464402	-0.846092943	1.103557345
Q9DBX6	-0.257640971	-0.84596967	1.103610641
Q91V98	-0.255242319	-0.847642148	1.102884467
P12265	-0.256306844	-0.846900475	1.103207318
P26043	-0.256129053	-0.847024408	1.103153462
Q8K1H1	-0.268338867	-0.838453664	1.106792531
Q91V36	-0.267883296	-0.838775631	1.106658927
Q9EQP2	-0.269943158	-0.837318511	1.107261669
Q9ET30	-0.269274755	-0.83779171	1.107066465
P28654	-0.261209362	-0.84347296	1.104682323
Q61091	-0.264670373	-0.841041511	1.105711884
Q80TE4	-0.231372785	-0.864032943	1.095405728
Q9QYJ0	-0.235949631	-0.860925501	1.096875131
Q3UIR3	-0.237032557	-0.860187801	1.097220358
Q8BFQ9	-0.238042542	-0.859498944	1.097541486
P85094	-0.240138697	-0.858066662	1.098205359
Q9WTS5	-0.241886746	-0.856869544	1.098756291
Q07113	-0.242920021	-0.856160773	1.099080795
Q99KF1	-0.24317179	-0.855987944	1.099159734
Q00993	-0.250609517	-0.85085924	1.101468757
P11276	-0.247353058	-0.853110218	1.100463276
P70188	-0.244683592	-0.854949079	1.099632671
P49138;Q3UMW7	-0.167236717	-0.905838013	1.07307473
Q8C050	-0.16632623	-0.906408352	1.072734582
Q9DBN4	-0.162942566	-0.908522298	1.071464864
Q6PFX8	-0.165401344	-0.906987055	1.072388399
Q8BFW7	-0.165785427	-0.906746814	1.072532241
O70340	-0.16472694	-0.907408613	1.072135553
P84091	-0.164211485	-0.907730578	1.071942063
Q64008	-0.169410066	-0.904474007	1.073884072
E9PWR4	-0.170865467	-0.903558543	1.07442401
Q61923	-0.17074327	-0.903635469	1.074378739
Q9D071	-0.174130257	-0.901498977	1.075629234
Q9D136	-0.173653322	-0.901800363	1.075453685
Q99MI1;Q6PH08	-0.172374494	-0.902607613	1.074982107
Q3TMP1	-0.172731149	-0.902382605	1.075113754
Q8BUB4	-0.172907262	-0.902271462	1.075178724
Q60960	-0.144803687	-0.919703957	1.064507644
Q9CSN1	-0.143614391	-0.92042825	1.064042641
Q5SVR0	-0.15459564	-0.913699224	1.068294864
Q6P9K8	-0.155060115	-0.91341256	1.068472675
Q5DTY9	-0.148600305	-0.917384506	1.065984811
Q6QIY3	-0.148377263	-0.917521074	1.065898338
Q9JMG1	-0.150552862	-0.916187323	1.066740186
Q64112	-0.151272738	-0.915745202	1.06701794
Q9QZE5	-0.151735152	-0.915460994	1.067196145
P32037	-0.177373688	-0.899444691	1.076818379
Q5U4C3	-0.177849828	-0.899142431	1.07699226
O88983	-0.182913026	-0.895917336	1.078830363
Q3TC46	-0.180470665	-0.897475533	1.077946198
Q80U23;Q8BHS8	-0.181234725	-0.896988572	1.078223296
Q8QZR5	-0.181287281	-0.896955059	1.07824234
O70250	-0.185119067	-0.894505914	1.079624981
Q9WUH1	-0.187197272	-0.893172809	1.080370082
Q8BH27	-0.191150061	-0.89062791	1.081777972
Q640Q5	-0.193404334	-0.889171087	1.082575421
Q9R0K7	-0.193817538	-0.888903623	1.08272116
Q921N8	-0.194807089	-0.888262549	1.083069638
Q80V26	-0.19428648	-0.888599918	1.082886397
Q8K013	-0.19436684	-0.888547856	1.082914696
Q8VHI5	-0.201189023	-0.884109623	1.085298646
A2AT37	-0.20182817	-0.883691949	1.085520119
P27661;Q64522	-0.201903758	-0.883642532	1.08554629
Q3TA38	-0.19969546	-0.885084396	1.084779856
Q80ZJ6	-0.198733573	-0.885711244	1.084444816
Q5F2F2	-0.206670782	-0.880516931	1.087187713
Q6PGA0	-0.208274859	-0.879461161	1.08773602
Q91W34	-0.207872288	-0.879726316	1.087598603
Q91YQ5	-0.207636593	-0.879881497	1.08751809
Q9R020	-0.207703142	-0.879837686	1.087540828
Q64331	-0.203694879	-0.882470242	1.08616512
Q91XL3	-0.203089043	-0.882867044	1.085956087
Q5U419	-0.205383973	-0.881362417	1.086746389
Q91ZP6	-0.204580514	-0.88188966	1.086470175
Q501J6	-0.212782367	-0.876483553	1.08926592
Q571K4	-0.211957954	-0.877029349	1.088987303
Q8R1J3	-0.2246238	-0.868584686	1.093208485
Q91VS8	-0.225924098	-0.86771054	1.093634638
Q8CFA2	-0.218188885	-0.872890898	1.091079782
Q8VHE0	-0.221058561	-0.870974583	1.092033144
Q9JJ61;Q8BVG5	-0.220220313	-0.871535024	1.091755337
Q9CQV4	-0.505289045	-0.646528562	1.151817607
P03995	-0.508363033	-0.643691119	1.152054152
Q80YS6	-0.508579381	-0.643491051	1.152070432
Q9Z218	-0.508702538	-0.643377139	1.152079678
Q61555	-0.511052779	-0.641200321	1.1522531
Q80TJ1;Q8BYR5	-0.509805889	-0.642355918	1.152161807
Q8BP47	-0.50156045	-0.649957159	1.15151761
Q05921	-0.499711239	-0.651652289	1.151363527
P57680	-0.49872078	-0.652558779	1.151279559
Q9D9I4	-0.498499596	-0.652761075	1.151260671
Q8R3H7	-0.49405653	-0.656814149	1.150870679
Q9D1I5	-0.495914894	-0.65512135	1.151036244
Q9QXT5	-0.49598007	-0.655061917	1.151041987
Q9Z1A1	-0.496004099	-0.655040004	1.151044103
O70400	-0.497296065	-0.653860953	1.151157017
Q8BUE4	-0.497482481	-0.653690688	1.151173169
P30204	-0.520960867	-0.631959946	1.152920813
Q8R4W6	-0.522450928	-0.630561378	1.153012306
Q9D1G1	-0.521928268	-0.631052212	1.15298048
Q8VCM3	-0.515571488	-0.636998884	1.152570372
Q9QZZ6	-0.51766909	-0.635041305	1.152710395
E9PUS2;P58544	-0.51702174	-0.635645934	1.152667674
Q62383	-0.517150471	-0.635525734	1.152676204
Q5NCI0	-0.527477735	-0.625825874	1.153303609
Q9D2C7	-0.527803993	-0.625517595	1.153321587
B8JKV0	-0.529989752	-0.623449352	1.153439104
Q9EST3	-0.529304811	-0.624098017	1.153402828
A0A0N4SUI7	-0.535744165	-0.617979847	1.153724013
Q6Y7W8	-0.534333464	-0.619323996	1.153657461
Q9ERN0;REV__Q9ERN0	-0.533350059	-0.620259741	1.153609799
Q3UCV8	-0.539525222	-0.614366565	1.153891788
P62746	-0.538227777	-0.615608183	1.153835961
Q99JY0	-0.536982257	-0.616798395	1.153780653
Q69ZQ2	-0.537394327	-0.61640481	1.153799137
Q8K1G2	-0.537464078	-0.616338169	1.153802247
Q91XI1	-0.440358393	-0.704246768	1.144605161
Q9EPR4	-0.440493196	-0.704131197	1.144624393
P15209	-0.439537149	-0.704950475	1.144487624
Q70IV5	-0.43933922	-0.705119981	1.144459201
Q62311	-0.436306402	-0.707712633	1.144019035
Q91XE8	-0.437104903	-0.707030866	1.144135769
Q60770;REV__A2AAE1	-0.434285775	-0.709435171	1.143720946
Q7TMF3	-0.432986883	-0.710540414	1.143527297
O35607	-0.451346616	-0.694769344	1.146115959
P08226	-0.45317563	-0.693180572	1.146356202
Q5KU39	-0.452707471	-0.693587545	1.146295016
Q9CQB5	-0.452930294	-0.69339387	1.146324164
Q8C7H1	-0.448998992	-0.69680389	1.145802882
P22437	-0.447407382	-0.698180236	1.145587619
Q8VDU0	-0.447569	-0.698040588	1.145609588
P17095	-0.443400465	-0.701634496	1.145034961
Q6A0A9	-0.443932382	-0.701176826	1.145109208
Q8BUR4	-0.445714249	-0.699641713	1.145355963
A6X919	-0.446515027	-0.698950841	1.145465867
Q9JLY7	-0.446376901	-0.699070053	1.145446954
Q0P678	-0.460288339	-0.686971409	1.147259748
P56395	-0.459385272	-0.687762474	1.147147746
Q9CZE3;Q8QZZ8	-0.45973765	-0.687453893	1.147191544
Q8BR07	-0.462636573	-0.684910697	1.14754727
Q8CGB3	-0.461697587	-0.685735356	1.147432943
Q9R0M3	-0.461109039	-0.686251807	1.147360846
P28798	-0.473438365	-0.675362001	1.148800366
A2A432	-0.472566851	-0.676136669	1.14870352
Q9R097	-0.472574996	-0.676129432	1.148704428
P01029;REV__Q5XG71	-0.470429964	-0.678032923	1.148462887
Q9WUB3	-0.471373791	-0.677195934	1.148569726
P27870	-0.468382177	-0.679845892	1.148228069
Q9CQC9	-0.467464544	-0.680656964	1.148121508
Q8BIG7	-0.466005848	-0.681944568	1.147950415
Q8CII2	-0.465108533	-0.6827356	1.147844133
Q8CJ53	-0.464624137	-0.683162294	1.147786431
Q9QZK2	-0.464780565	-0.683024525	1.14780509
Q8R314	-0.486085866	-0.664035012	1.150120878
Q9WTW5	-0.486680438	-0.663498584	1.150179021
Q8CG48	-0.490692216	-0.659869812	1.150562028
Q8CJG1;Q8CJF8	-0.491383803	-0.659242609	1.150626412
A2RTL5	-0.48899282	-0.661408947	1.150401767
Q6ZPF4	-0.489695498	-0.660772889	1.150468387
P11438	-0.477319564	-0.67190297	1.149222534
Q3UJB9	-0.476072064	-0.673016405	1.149088469
B7ZMP1	-0.476635972	-0.672513289	1.149149262
P47758	-0.476670602	-0.672482383	1.149152985
Q8BTH8	-0.481945641	-0.667760528	1.149706169
Q8CE90	-0.480087024	-0.669427399	1.149514422
P09581	-0.480736598	-0.668845231	1.149581829
Q5U680	-0.481017435	-0.668593405	1.149610841
P39061	-0.393740122	-0.743197244	1.136937366
Q9DBU0	-0.392844024	-0.743926423	1.136770447
Q9JI78	-0.398577893	-0.739248078	1.137825972
Q3U4I7	-0.395629844	-0.741657148	1.137286992
Q61179	-0.396797927	-0.740703563	1.137501489
P62983;A0A0A6YW67;P62984;P0CG49;P0CG50	-0.387404682	-0.748337048	1.135741729
Q9CZV8;Q8BH16	-0.381348868	-0.753216333	1.134565201
Q9R226	-0.380384844	-0.753990043	1.134374887
P47880	-0.38296977	-0.751913555	1.134883325
Q9JKR6	-0.382654955	-0.752166767	1.134821722
Q61879	-0.384588755	-0.750609974	1.13519873
Q6NV72	-0.384494222	-0.750686156	1.135180377
Q66GT5	-0.383936018	-0.75113583	1.135071848
Q4JIM5	-0.383600081	-0.751406317	1.135006398
Q61878	-0.383452856	-0.751524827	1.134977683
A0A0J9YUD5	-0.409510904	-0.730244877	1.139755781
A2AGT5	-0.408948453	-0.730710714	1.139659167
Q8CF89	-0.410818147	-0.729161062	1.139979209
Q8R4H9	-0.411749666	-0.728387795	1.140137462
Q8K448	-0.402619733	-0.735932371	1.138552105
Q9DCN2	-0.401564557	-0.736799414	1.138363971
Q9D2V7	-0.404255783	-0.734586017	1.1388418
Q9DC29	-0.405458599	-0.733594626	1.139053225
Q6GQX6	-0.428160025	-0.714633745	1.142793771
P58501	-0.424627735	-0.717615412	1.142243147
Q8VCF0	-0.4262971	-0.716207726	1.142504825
O88522	-0.420126982	-0.721397721	1.141524703
P59759;Q8VIM5	-0.419072047	-0.722281536	1.141353583
Q9DBR4	-0.418327291	-0.722904865	1.141232156
Q9WU79	-0.417782938	-0.72336014	1.141143078
A2AIV2	-0.416322526	-0.724580215	1.140902742
Q8BVI5	-0.416955458	-0.724051685	1.141007144
Q80WW9	-0.337517833	-0.787568059	1.125085892
Q8K0C4	-0.339824858	-0.785801597	1.125626455
E9PV24	-0.333021141	-0.790998014	1.124019155
Q91V61	-0.33262155	-0.791301974	1.123923525
O08688	-0.335403704	-0.789182815	1.124586519
Q8BHC4	-0.33493751	-0.789538376	1.124475886
Q6KAU7	-0.330159829	-0.793171548	1.123331377
Q8CI61	-0.328315033	-0.794569207	1.122884239
Q8R307	-0.329159811	-0.793929544	1.123089355
Q6PGG6	-0.32543378	-0.796746314	1.122180095
Q6P2L7	-0.327431539	-0.795237535	1.122669074
Q9JM62	-0.326532349	-0.795917055	1.122449405
Q8CCS6;Q5XFR0	-0.322347673	-0.799070395	1.121418067
Q8VHJ5	-0.316958318	-0.803109666	1.120067984
Q8VCM8	-0.319273099	-0.801377767	1.120650866
P03921	-0.319841526	-0.800951783	1.120793308
Q8C854	-0.320021353	-0.800816961	1.120838315
P62900	-0.37611173	-0.757409615	1.133521346
Q9D379	-0.374325296	-0.758834408	1.133159704
Q8BJ56	-0.36992215	-0.762334129	1.132256278
P01921	-0.367460008	-0.764283634	1.131743641
P00329	-0.365724852	-0.76565431	1.131379163
O35066	-0.365169386	-0.766092539	1.131261924
Q9CYH5	-0.365055313	-0.766182501	1.131237815
Q9WV69	-0.358780111	-0.771113823	1.129893935
Q8R0X7	-0.35496537	-0.774094789	1.129060159
Q921K8	-0.355029191	-0.774045022	1.129074213
Q8BXR9	-0.350049191	-0.777917781	1.127966972
Q9QY06	-0.352863643	-0.775731734	1.128595377
Q2VLH6	-0.351163972	-0.777052728	1.1282167
Q7TN29	-0.351770831	-0.776581362	1.128352193
Q9ER67;Q6DIC6	-0.352218859	-0.776233159	1.128452018
Q3UHB1	-0.344224156	-0.782420424	1.12664458
Q9ERE8	-0.344256059	-0.782395843	1.126651903
Q7SIG6	-0.344670557	-0.782076402	1.126746959
O35516	-0.34494021	-0.781868508	1.126808718
Q8CDG3	-0.34504887	-0.781784717	1.126833587
Q91YS8	-0.346488264	-0.780673796	1.127162059
Q9ER38	-0.347549542	-0.779853557	1.127403098
P84104	-0.872721321	-0.21844322	1.091164541
P54797	-0.873416738	-0.217399727	1.090816465
P70302	-0.873073424	-0.217915041	1.090988465
P0C605;Q61410	-0.869054331	-0.223924373	1.092978703
Q9Z2H2	-0.869079614	-0.223886703	1.092966317
P01867	-0.870252006	-0.222138087	1.092390093
P33267	-0.869773274	-0.222852551	1.092625825
Q3UL36	-0.860678368	-0.23631257	1.096990937
Q8BIF0	-0.861133832	-0.235643555	1.096777388
P28650	-0.866005288	-0.228454937	1.094460225
Q8BGB2	-0.866591032	-0.227586461	1.094177493
Q91ZX7	-0.864212252	-0.231107932	1.095320185
Q9R1C7	-0.864453596	-0.23075132	1.095204916
O88968	-0.865095097	-0.229802703	1.0948978
Q9D8T2	-0.865491298	-0.229216291	1.094707589
B1ART2	-0.854641924	-0.245130068	1.099771991
Q3TKY6	-0.856204138	-0.242856838	1.099060976
Q8K299	-0.85629534	-0.242723941	1.099019281
Q61127	-0.851347504	-0.249904201	1.101251705
Q99JI4	-0.85090635	-0.25054149	1.10144784
Q811S7	-0.852355516	-0.248446253	1.100801769
P11680	-0.852790314	-0.247816612	1.100606926
Q59J78	-0.853013188	-0.247493685	1.100506873
Q8BLX7	-0.836743627	-0.270754501	1.107498128
Q8C9B9	-0.83714794	-0.270183967	1.107331907
Q61335	-0.833355139	-0.275521397	1.108876536
Q80TH2	-0.833894446	-0.27476445	1.108658897
P45700	-0.840519771	-0.265411236	1.105931006
Q3UH45	-0.840762892	-0.265066086	1.105828978
P56818	-0.842347225	-0.262813495	1.105160721
P59672;Q8BIZ1	-0.841655856	-0.263797199	1.105453055
Q9DC51	-0.841456372	-0.264080824	1.105537196
O88942;Q8K120;Q60591;P97305	-0.843789818	-0.260757314	1.104547132
Q91YX5	-0.843724564	-0.260850429	1.104574993
Q62036	-0.846651816	-0.256663449	1.103315266
Q62241	-0.846410558	-0.257009301	1.103419859
Q8BL97	-0.84626514	-0.257217697	1.103482836
Q9CRD2	-0.923057731	-0.139281686	1.062339417
Q7TMY4	-0.921297683	-0.142184415	1.063482098
Q9WUQ2	-0.920779032	-0.143037763	1.063816795
P48410	-0.92720297	-0.1324027	1.05960567
Q571H0	-0.92485881	-0.136300196	1.061159007
Q91W45	-0.925510868	-0.135217998	1.060728866
Q811L6;Q3U214	-0.909413075	-0.161512494	1.070925569
Q9JHG6	-0.911006704	-0.158947695	1.069954399
E9PYP2	-0.906511613	-0.166161276	1.072672889
Q9WVE8	-0.905992991	-0.166989411	1.072982403
O35382	-0.907694159	-0.164269807	1.071963966
Q8CHX7	-0.908023819	-0.16374173	1.071765548
Q7TQ62	-0.907362469	-0.164800789	1.072163257
Q61043	-0.907040409	-0.16531602	1.072356429
Q80X98	-0.906873176	-0.16558343	1.072456606
Q8C2E7	-0.906870756	-0.165587299	1.072458055
Q6PNC0	-0.913562813	-0.154816697	1.06837951
Q9QY76	-0.913560519	-0.154820414	1.068380933
O70423;Q812C9	-0.915265564	-0.152052966	1.067318529
Q9CZ52	-0.914481492	-0.153326777	1.067808269
Q8BHB0	-0.919591727	-0.14498781	1.064579537
Q9Z1K7	-0.918977131	-0.145995352	1.064972483
Q6PAR5	-0.918025751	-0.147552489	1.065578239
Q8C437	-0.916809766	-0.149538279	1.066348046
Q9ESJ0	-0.916836286	-0.149495024	1.06633131
P42567	-0.896721491	-0.181653482	1.078374972
Q8K4S1	-0.897202425	-0.180899268	1.078101694
Q8C0N2	-0.89895816	-0.178139968	1.077098128
P01027	-0.898066231	-0.179542882	1.077609112
Q9R112	-0.8979943	-0.179655917	1.077650216
F8VPN4	-0.89980884	-0.176799688	1.076608528
Q6P3E7	-0.899952331	-0.176573395	1.076525726
Q9CRB9	-0.899995956	-0.176504584	1.076500539
Q4FZC9	-0.900911074	-0.175059792	1.075970866
O70458	-0.901388739	-0.174304635	1.075693374
Q99JX3	-0.901350315	-0.174365407	1.075715722
O89110	-0.901910664	-0.173478705	1.075389368
P60766	-0.902545313	-0.172473261	1.075018573
P63037	-0.902456618	-0.172613851	1.075070468
P70297	-0.90245517	-0.172616145	1.075071315
Q52KR3	-0.903207771	-0.171422431	1.074630202
Q61194	-0.904414659	-0.169504496	1.073919155
Q61062	-0.886199492	-0.197983591	1.084183083
P16406	-0.888266925	-0.194800339	1.083067264
P70121	-0.888335306	-0.194694843	1.083030148
O35309	-0.889847741	-0.192358052	1.082205793
Q8BTS3;A4UUI3	-0.889590735	-0.192755605	1.08234634
Q61704	-0.890495976	-0.191354468	1.081850444
Q80TA1	-0.890126196	-0.191927104	1.082053299
A0A7N9VR94	-0.893744357	-0.186306918	1.080051275
Q9D3E6	-0.893599027	-0.186533404	1.080132431
D3YZP9	-0.891205952	-0.190253897	1.081459849
Q3UVR3	-0.892220992	-0.188677875	1.080898867
Q91VN4	-0.892502674	-0.188239982	1.080742655
O89090	-0.878180711	-0.210216181	1.088396892
Q8VE92;Q8C7Q4	-0.878843684	-0.209211595	1.088055278
Q68FM7	-0.876861552	-0.212211494	1.089073046
Q80ZS3	-0.875986477	-0.213532485	1.089518962
Q8C5L7	-0.883861976	-0.201568045	1.085430021
E9Q8V6	-0.884315515	-0.200873776	1.085189291
Q9WTK5	-0.884252604	-0.200970113	1.085222717
P42225	-0.882216628	-0.204081864	1.086298492
Q8BHJ5	-0.880623447	-0.206508775	1.087132223
Q62443	-0.631745807	-0.521189177	1.152934984
Q9JHS9	-0.630708802	-0.522293978	1.153002779
Q6PDY0	-0.63825137	-0.514226816	1.152478186
Q8R464	-0.638252467	-0.514225638	1.152478105
P36916	-0.63600735	-0.516634563	1.152641913
Q9D3B1	-0.63402033	-0.518761135	1.152781465
Q61464	-0.615898668	-0.537923956	1.153822624
Q7TQ95	-0.616637387	-0.53715085	1.153788237
P47738	-0.621596596	-0.531943213	1.153539809
Q99MP3	-0.623502248	-0.529933918	1.153436166
Q9Z1G4;Q920R6	-0.628129999	-0.525035429	1.153165428
E9Q2E4	-0.628323289	-0.524830241	1.15315353
Q01237	-0.628257522	-0.524900061	1.153157583
Q924Z4	-0.626078084	-0.527210727	1.153288811
Q2HXL6	-0.62482719	-0.528534226	1.153361416
Q64444	-0.624851386	-0.528508643	1.15336003
O88447;Q91W40	-0.666770369	-0.483047885	1.149818254
Q80V03	-0.667601464	-0.482122802	1.149724266
Q9JKL4	-0.667454993	-0.482285907	1.1497409
Q60715	-0.664608655	-0.485449609	1.150058265
Q8BZZ3	-0.665528769	-0.484428122	1.149956891
Q9JL56	-0.665446406	-0.484519607	1.149966013
Q99N89	-0.657470683	-0.493334744	1.150805427
P01872	-0.6615417	-0.488846094	1.150387794
Q8CGF7;Q3B807	-0.661003672	-0.489440607	1.150444279
Q61646	-0.643087499	-0.509015611	1.15210311
P18242	-0.64203691	-0.510150274	1.152187183
Q8R015	-0.641731601	-0.510479744	1.152211345
Q99P72	-0.652648608	-0.498622571	1.151271179
Q9D3A9	-0.653199797	-0.498019722	1.151219519
Q02105	-0.651110764	-0.500302402	1.151413166
Q7TMM9	-0.650820853	-0.500618727	1.15143958
E9Q8I9	-0.649916647	-0.501604598	1.151521245
Q9CR21	-0.649440016	-0.50212384	1.151563856
P67778	-0.550907593	-0.603395234	1.154302827
Q8CJF9	-0.54841346	-0.605811456	1.154224916
Q9DCG2	-0.549358669	-0.60489658	1.154255249
Q8CI04	-0.543751169	-0.61030977	1.154060939
Q3UGX3	-0.546418263	-0.607739398	1.154157661
Q8BU25	-0.546259733	-0.607892397	1.15415213
P70372	-0.564162487	-0.590438393	1.15460088
Q8K382	-0.565838587	-0.588785943	1.15462453
Q8BWT1	-0.559205597	-0.595306811	1.154512408
B2RXC8	-0.556035023	-0.598406353	1.154441376
O35114	-0.554170584	-0.600223789	1.154394373
O35465	-0.582674103	-0.572010021	1.154684124
P54103	-0.578347	-0.576352965	1.154699964
Q8BW41	-0.579359336	-0.575338869	1.154698205
Q8K2T4	-0.579665423	-0.575032017	1.15469744
P01910	-0.576701039	-0.577999256	1.154700295
Q9ES30	-0.576503298	-0.578196826	1.154700124
Q3UVL4	-0.575361861	-0.579336397	1.154698258
Q8R310	-0.574118917	-0.580575604	1.154694521
O54786	-0.569221277	-0.585441287	1.154662564
Q5FW52	-0.571217566	-0.583461334	1.154678901
P33173	-0.572976336	-0.581713185	1.154689521
Q8BFV2	-0.572392276	-0.58229411	1.154686387
Q9JMB0;REV__O08638;REV__Q6URW6;A6PWD2	-0.5725692	-0.582118177	1.154687377
Q6PFE1	-0.602434718	-0.551897117	1.154331834
Q8C761	-0.602765491	-0.55155648	1.154321971
Q3UVK0	-0.602849411	-0.551470036	1.154319447
Q8CI59	-0.602807542	-0.551513165	1.154320707
Q8CHK3	-0.600738501	-0.553641838	1.154380339
Q91YI1	-0.601724329	-0.552628242	1.154352571
P20491	-0.607130403	-0.547048991	1.154179394
Q69ZW3	-0.606244536	-0.547965666	1.154210202
Q62417	-0.605595651	-0.548636511	1.154232163
Q64435;K9J7B2;B2RT14;D3Z748;Q62452;P70691;Q63886	-0.605202011	-0.549043224	1.154245235
O08908;Q64143	-0.604027037	-0.5502561	1.154283138
P03953	-0.604634456	-0.549629296	1.154263753
Q6GYP7	-0.598761528	-0.555670974	1.154432502
Q9EQC5	-0.597416887	-0.557048413	1.1544653
P18608	-0.596156416	-0.558337663	1.15449408
Q99M87	-0.596287094	-0.558204091	1.154491184
Q3TNA1	-0.589800683	-0.564809706	1.154610389
Q9CWZ3;A0A0N4SUH6	-0.594889695	-0.559631396	1.154521092
Q99MQ4	-0.592417436	-0.562150872	1.154568308
Q8BGT6	-0.593179546	-0.561374982	1.154554527
Q9D684	-0.593228393	-0.561325227	1.154553621
Q8BX94	-0.722341173	-0.41900082	1.141341992
Q9CXE7	-0.721234021	-0.420322241	1.141556262
Q6ZQB6	-0.716820736	-0.425570515	1.142391251
Q9D6K9	-0.71737844	-0.424908974	1.142287414
Q99MS7	-0.71278542	-0.430342766	1.143128186
Q9EP52	-0.714928654	-0.427811271	1.142739925
Q6XPS7	-0.73347891	-0.405598889	1.139077798
Q8C341	-0.733343708	-0.405762774	1.139106482
P97401	-0.736432114	-0.402011705	1.138443819
Q3ULL6	-0.736673176	-0.401718263	1.138391439
Q5DU25	-0.736706542	-0.40167764	1.138384182
Q60698	-0.726093689	-0.414507633	1.140601322
Q9D7M1	-0.726195801	-0.414385054	1.140580855
Q9QZN1	-0.726291093	-0.414270646	1.140561739
Q91Z38	-0.726711711	-0.413765478	1.140477189
Q9D1P4	-0.727251453	-0.413116826	1.140368279
P62821	-0.730783933	-0.408860016	1.139643949
Q99KX1	-0.730468073	-0.409241461	1.139709534
Q61462	-0.729407002	-0.410521672	1.139928674
Q62203	-0.729794528	-0.410054322	1.13984885
B1AVY7	-0.68021159	-0.467968548	1.148180138
Q8BYU6	-0.679788548	-0.46844702	1.148235568
B1AUN2	-0.684228609	-0.463412484	1.147641094
E9PZP8	-0.684189302	-0.463457178	1.14764648
P31649	-0.683231108	-0.464545993	1.147777101
Q80XL6	-0.683115152	-0.464677667	1.147792819
Q14CH7	-0.682696382	-0.465153041	1.147849423
Q9Z2E1	-0.682226678	-0.465685935	1.147912614
Q6NZM9	-0.670082172	-0.479355877	1.149438048
Q8VEH8	-0.670541244	-0.478842902	1.149384146
Q9CQ06	-0.673163048	-0.475907635	1.149070683
Q9Z0S9	-0.675827008	-0.472915326	1.148742334
Q9CPR1	-0.697914577	-0.447714809	1.145629387
Q9CWR2	-0.696627348	-0.449202942	1.14583029
H3BKQ3	-0.692615605	-0.453825135	1.14644074
Q8K212	-0.692723567	-0.453701055	1.146424622
Q8BKZ9	-0.691137266	-0.455522472	1.146659739
Q8BGT7	-0.690166287	-0.456635556	1.146801843
Q9DAW6	-0.68965901	-0.457216527	1.146875537
P20918	-0.707363162	-0.436715798	1.144078961
P36371	-0.710071373	-0.433538333	1.143609706
Q8CA72	-0.70995976	-0.433669506	1.143629266
P53690	-0.70432551	-0.440266536	1.144592046
P51175	-0.705740867	-0.43861385	1.144354717
Q64511;Q01320	-0.705471419	-0.438928713	1.144400132
Q3UH68	-0.701813798	-0.443191989	1.145005787
Q9ET66	-0.701413603	-0.443657232	1.145070835
O08576	-0.703461968	-0.441273394	1.144735363
Q8BW96	-0.702767619	-0.442082167	1.144849786
O88322	-0.778625338	-0.349136339	1.127761677
P05622	-0.779597118	-0.34788108	1.127478198
P97820	-0.776670753	-0.351655776	1.128326529
Q9D114	-0.775369335	-0.353329365	1.1286987
Q2YDW7	-0.774963059	-0.353851184	1.128814243
Q9D1M7	-0.774695159	-0.354195108	1.128890267
E9Q735	-0.764583887	-0.3670802	1.131664087
Q9Z2B9	-0.764575669	-0.367090598	1.131666267
B2RUR8	-0.76322643	-0.368796049	1.132022478
Q9DC16	-0.762727482	-0.369425904	1.132153386
P18293	-0.771289157	-0.358556186	1.129845343
Q5SUF2	-0.773376935	-0.355885494	1.129262428
P62342	-0.766989976	-0.364030786	1.131020762
Q8R010	-0.769149241	-0.361285342	1.130434583
O55125	-0.768277199	-0.36239513	1.130672329
Q61805	-0.768081004	-0.362644625	1.130725629
Q80TQ5	-0.740608597	-0.396914171	1.137522768
Q0VF55	-0.739849311	-0.397843049	1.13769236
Q9DB75	-0.739807358	-0.397894345	1.137701702
Q61838	-0.744136727	-0.392585414	1.136722141
Q8CIB6	-0.744043598	-0.392699943	1.136743541
O88502	-0.746127362	-0.390133849	1.136261211
Q61070	-0.745582198	-0.390805909	1.136388106
O88876	-0.748064117	-0.387742224	1.135806341
P98083	-0.750722665	-0.384448914	1.135171579
Q99MP8	-0.749328312	-0.386177687	1.135505999
Q9CXY9	-0.749929874	-0.385432254	1.135362128
Q569Z6	-0.758748398	-0.374433237	1.133181635
Q68FH0	-0.757693178	-0.375756477	1.133449654
P49070	-0.755218541	-0.378852041	1.134070582
Q8CH72	-0.75512914	-0.378963676	1.134092816
Q8BPN8	-0.752089448	-0.382751097	1.134840544
A0A0N4SUJ3	-0.752392011	-0.38237482	1.13476683
P35396	-0.752383677	-0.382385186	1.134768863
P46978	-0.81168969	-0.305400461	1.117090151
Q6PEV3	-0.812820515	-0.303865821	1.116686336
P52482	-0.81334042	-0.303159362	1.116499782
P59267	-0.81366094	-0.302723548	1.116384489
P49300	-0.818078613	-0.296694735	1.114773348
Q91X78	-0.817239418	-0.297843171	1.115082589
Q80TR4	-0.81456856	-0.301488283	1.116056843
Q8K284	-0.815996266	-0.299541669	1.115537934
Q99JY8	-0.81607428	-0.299435175	1.115509455
E9Q3L4	-0.822399012	-0.290758398	1.11315741
Q00623	-0.823432705	-0.289332101	1.112764807
Q8BWU5	-0.823535216	-0.28919053	1.112725746
P35564	-0.828374984	-0.28248041	1.110855393
Q6ZQ29	-0.829886647	-0.280373954	1.1102606
Q01341	-0.829387481	-0.281070088	1.110457569
A0A571BF02;REV__Q6Q783	-0.829063732	-0.281521291	1.110585022
Q921F4	-0.829196133	-0.281336793	1.110532927
Q8BTV1	-0.825655638	-0.286256994	1.111912632
Q8K019	-0.825365586	-0.286658853	1.112024439
Q91YT2	-0.827134234	-0.284205568	1.111339802
Q9EP53	-0.826625054	-0.284912554	1.111537609
Q8K2A1	-0.786568658	-0.338823798	1.125392456
P16858;A0A1D5RLD8;Q64467	-0.786331397	-0.339133557	1.125464955
P55065	-0.786288856	-0.339189087	1.125477942
Q8BGR6	-0.784407677	-0.341641136	1.126048813
P15920	-0.785294581	-0.340485928	1.125780509
Q3TZZ7	-0.785517906	-0.340194808	1.125712713
Q8VF25	-0.792396201	-0.331181577	1.123577778
Q9WV55	-0.792511255	-0.331030034	1.123541289
A2AAY5	-0.793100799	-0.33025311	1.123353909
P11835	-0.79339158	-0.329869658	1.123261238
Q8BZQ2	-0.790409149	-0.333794762	1.124203911
Q8BHN5	-0.787894842	-0.337090395	1.124985237
Q08642	-0.788341833	-0.33650539	1.124847223
Q8BMK4	-0.788624303	-0.336135507	1.12475981
Q9CXD9	-0.804338608	-0.315312092	1.1196507
Q61468	-0.804525526	-0.315061438	1.119586964
Q9CZX9	-0.804488979	-0.315110451	1.119599431
O35153	-0.805883299	-0.313238552	1.119121851
A2A7S8	-0.806475777	-0.312441939	1.118917716
Q9JJY3	-0.806451999	-0.312473924	1.118925923
Q8BJZ3	-0.797067229	-0.325008281	1.12207551
O35874	-0.798520188	-0.323079253	1.121599441
Q62136	-0.799387709	-0.321925482	1.121313192
