# Supplementary material for: Investigation of the Hydrogen Sulfide Signaling Pathway in Schwann Cells during Peripheral Nerve Degeneration: Multi-Omics Approaches
Source: Antioxidants (Basel). 2022 Aug 19;11(8):1606. doi: 10.3390/antiox11081606 (PMC9405209; doi:10.3390/antiox11081606)
Supplement: Supplementary file 1 [file antioxidants-11-01606-s001.zip › Proteomics clustering-Cluster 4.txt]

GeneID	Control	X1DAY	X1DAY.NEM
Q8BGW1	-0.84924506	1.102182211	-0.25293715
Q8BYM8	-0.848950835	1.102311577	-0.253360742
Q8CG71	-0.849044805	1.102270283	-0.253225478
Q9CR68	-0.849005602	1.102287513	-0.253281911
Q62083	-0.848655278	1.10244132	-0.253786042
Q9CQ45	-0.848302678	1.102595828	-0.25429315
P63024	-0.845729884	1.103714208	-0.257984324
P98078	-0.84735266	1.103010638	-0.255657978
Q99J08	-0.844862753	1.104087592	-0.259224839
P63087	-0.844735731	1.104142138	-0.259406407
Q9JJF9	-0.844623432	1.10419033	-0.259566898
Q9QX47	-0.84409608	1.104416237	-0.260320156
Q8VHN8;E9Q9G1	-0.84385917	1.104517511	-0.260658341
Q9D6V8	-0.843771709	1.104554865	-0.260783155
O08573	-0.842629269	1.105041141	-0.262411873
P97478	-0.843068641	1.104854487	-0.261785846
Q8BIQ6	-0.843085241	1.104847426	-0.261762185
Q9CQF0	-0.841881503	1.105357767	-0.263476264
O89079	-0.841283046	1.105610228	-0.264327183
P35278	-0.841546985	1.105498988	-0.263952003
Q9CYT6	-0.825120381	1.112118814	-0.286998433
Q3TW96	-0.826778757	1.111477958	-0.284699201
P54923	-0.825933441	1.111805374	-0.285871933
Q8R3B1	-0.826345275	1.111646055	-0.28530078
P19258	-0.828214587	1.110918206	-0.282703619
Q9DBC0	-0.829095366	1.110572579	-0.281477213
O09118	-0.828624248	1.110757665	-0.282133417
Q922Q6	-0.828820452	1.110680643	-0.281860191
Q9DCT6	-0.832012862	1.109415364	-0.277402502
Q5SF07	-0.831547256	1.109601323	-0.278054067
Q6ZWM4	-0.831491672	1.109623491	-0.278131818
Q9CR00	-0.830955989	1.10983677	-0.278880781
Q9JHF5	-0.830880925	1.109866604	-0.278985679
Q3UHX2	-0.830270972	1.110108568	-0.279837596
Q9CY16	-0.830137059	1.110161579	-0.28002452
Q91VH2	-0.834825585	1.10828158	-0.273455995
Q8CG14;Q8CFG8	-0.835630844	1.107953683	-0.272322839
Q0VBL3	-0.835291808	1.108091917	-0.272800108
Q8K2Q0	-0.835419085	1.108040053	-0.272620968
Q9D404	-0.83289804	1.109060485	-0.276162444
Q8C5L3	-0.8339454	1.1086383	-0.2746929
Q91YW3	-0.833552601	1.108796926	-0.275244325
Q8BZW8	-0.837537034	1.107171588	-0.269634554
Q8CHU3	-0.83784049	1.107046313	-0.269205823
P63044	-0.837050631	1.107371946	-0.270321315
Q8K2Q9	-0.836879675	1.107442237	-0.270562562
D3Z2R5	-0.836224687	1.107710926	-0.271486239
Q6PGL7	-0.836526008	1.10758744	-0.271061432
Q7TSS2;Q8BW45;Q8K2Z8	-0.839806878	1.106229386	-0.266422508
Q8K310	-0.839811771	1.106227342	-0.266415572
Q9JLV1	-0.840190469	1.106068982	-0.265878513
Q9WV80	-0.840071781	1.106118649	-0.266046869
Q8VCP8	-0.839178138	1.106491565	-0.267313427
Q91WG2	-0.83837415	1.106825489	-0.268451339
Q6PDG5	-0.883298277	1.085728416	-0.202430138
Q99PU5	-0.882723684	1.086031659	-0.203307976
Q811D0	-0.880938623	1.086967847	-0.206029224
Q8K353	-0.880880184	1.086998346	-0.206118162
E9Q4Z2	-0.880489865	1.087201807	-0.206711942
Q04863	-0.88070455	1.087089951	-0.206385401
P63046	-0.879398869	1.087768275	-0.208369406
Q6P8I4	-0.87862685	1.08816714	-0.209540291
O35691	-0.875538605	1.089746383	-0.214207779
Q99LP6	-0.875944929	1.089540083	-0.213595154
Q8BKX6	-0.875773198	1.089627329	-0.213854131
Q8K327	-0.875817594	1.089604781	-0.213787187
Q9WUB0	-0.875832106	1.08959741	-0.213765304
Q32NY4	-0.87736053	1.088817847	-0.211457317
Q9CYZ2	-0.876394203	1.089311454	-0.212917251
Q9WUE4	-0.87678052	1.089114426	-0.212333906
Q6P5F7	-0.871396961	1.091823851	-0.22042689
P25206	-0.872158336	1.091445385	-0.219287049
Q8C080	-0.871889926	1.091578983	-0.219689057
Q9WUD1	-0.874720132	1.090160585	-0.215440453
Q9ESK9	-0.874154132	1.090445963	-0.216291831
S4R2K0	-0.873939694	1.090553857	-0.216614164
O55242	-0.869168088	1.092922959	-0.223754871
Q8QZT1	-0.869309732	1.092853501	-0.223543769
Q8BSA9	-0.866312889	1.09431186	-0.227998971
Q8R105	-0.86654623	1.09419915	-0.22765292
Q99LH1	-0.868070047	1.093459617	-0.22538957
P52194	-0.867509661	1.093732286	-0.226222625
P56375	-0.867111677	1.093925435	-0.226813758
Q8BIQ5	-0.867017514	1.093971074	-0.22695356
Q99L43	-0.864562448	1.095152878	-0.23059043
O35926	-0.865368908	1.09476639	-0.229397482
Q6NXN1	-0.865254434	1.094821353	-0.229566918
Q8BKF1	-0.862971367	1.095910484	-0.232939117
Q91WE6	-0.863415873	1.095699482	-0.232283609
Q8VEB2	-0.861140672	1.096774176	-0.235633504
Q9WVJ5	-0.862230231	1.096261168	-0.234030937
Q8BTZ7	-0.857850439	1.098305133	-0.240454694
Q8CAQ8	-0.856737248	1.098816956	-0.242079709
Q8R3I3	-0.857047789	1.098674486	-0.241626697
Q99PJ0	-0.856969763	1.098710306	-0.241740543
Q8R5G7	-0.86026608	1.09718379	-0.23691771
Q9QZH3	-0.859807094	1.097397982	-0.237590887
Q9Z2A5	-0.858605654	1.097956137	-0.239350483
E9QA15;REV__Q8BSS9;REV__B2RXQ2	-0.858962355	1.097790802	-0.238828448
P58404	-0.859265799	1.097649902	-0.238384103
P56135	-0.8557823	1.099253564	-0.243471265
Q9ERL9	-0.855927264	1.099187432	-0.243260168
Q8BI08	-0.854915871	1.099647745	-0.244731874
P59235	-0.854464674	1.099852282	-0.245387608
Q3UKC1	-0.854289776	1.099931432	-0.245641656
Q9ERS2	-0.854317044	1.099919097	-0.245602053
Q4VBD2	-0.853690512	1.100202058	-0.246511546
P35546	-0.853243428	1.100403384	-0.247159956
P42230	-0.852806988	1.100599446	-0.247792458
Q91Z40	-0.850793625	1.101497882	-0.250704257
Q99PU8	-0.851853477	1.101026168	-0.249172691
Q9Z207	-0.851361373	1.101245531	-0.249884159
Q8BL74	-0.708501176	1.143883137	-0.435381961
Q9QYR9	-0.70890061	1.143813937	-0.434913328
Q62288	-0.707756234	1.144011545	-0.436255311
P63002	-0.706639522	1.144202457	-0.437562936
P52293	-0.707168208	1.14411231	-0.436944102
P59114	-0.707084092	1.144126681	-0.437042589
Q8BL99	-0.712538406	1.143172478	-0.430634072
Q91WR3	-0.7129763	1.143093894	-0.430117595
Q9CPP0	-0.71344059	1.14301025	-0.42956966
Q9DB85	-0.713895957	1.14292789	-0.429031933
Q9D7K2	-0.710377509	1.143555957	-0.433178448
Q8R420	-0.711225228	1.143406373	-0.432181145
P27601	-0.711933116	1.143280618	-0.431347502
Q9Z160	-0.711863089	1.143293092	-0.431430004
Q8BWY7	-0.696281861	1.145883795	-0.449601934
E9Q3G8	-0.69582145	1.145954823	-0.450133372
O88487	-0.695760085	1.145964266	-0.450204182
Q501J2	-0.698441259	1.145546477	-0.447105218
Q8BZA9	-0.697619559	1.145675649	-0.44805609
P32067	-0.704118386	1.144626524	-0.440508137
Q91WK5	-0.703076083	1.144799043	-0.441722959
P62075	-0.702976872	1.144815379	-0.441838507
Q8BK30	-0.702964209	1.144817463	-0.441853254
P0DP28;P0DP27;P0DP26;Q9D6P8	-0.699464252	1.145384261	-0.445920009
Q8R2S9	-0.701147966	1.14511388	-0.443965914
Q9QZD4	-0.742627684	1.137067126	-0.394439443
Q8K2T8	-0.740570994	1.137531189	-0.396960196
Q8BK72	-0.740925884	1.137451616	-0.396525731
Q9EPU5	-0.740820548	1.137475256	-0.396654709
P10637	-0.741848635	1.137243737	-0.395395102
Q9DCX2	-0.741326566	1.137361523	-0.396034957
Q60520	-0.737646755	1.138178919	-0.400532163
Q8C4S8	-0.737674034	1.138172942	-0.400498908
P39749	-0.737086683	1.138301366	-0.401214683
P61161	-0.737138746	1.138290005	-0.401151259
Q9EQH2	-0.739590553	1.137749937	-0.398159384
F2Z3U3	-0.739908306	1.137679217	-0.397770911
Q91WD5	-0.739918613	1.13767692	-0.397758307
E9PUL3	-0.738866802	1.137910393	-0.399043591
Q3UR32	-0.738787041	1.137928023	-0.399140981
Q8K3G5	-0.738145957	1.138069344	-0.399923387
Q6TCG2	-0.738443903	1.138003749	-0.399559846
Q9D975	-0.738500205	1.137991337	-0.399491132
Q99KK9	-0.747478936	1.135944447	-0.388465511
P58158	-0.747515861	1.13593575	-0.388419888
Q6AW69	-0.747513539	1.135936297	-0.388422758
Q6Y685	-0.747928413	1.13583842	-0.387910007
O35972	-0.74784689	1.135857676	-0.388010786
Q91W97	-0.747783822	1.135872565	-0.388088743
P62702	-0.749951532	1.135356937	-0.385405405
Q9D903	-0.749920746	1.135364316	-0.38544357
P55284	-0.748554068	1.135690263	-0.387136195
Q3UQ84	-0.748542994	1.135692891	-0.387149897
Q9D0E3	-0.749138342	1.135551305	-0.386412963
Q6PB70	-0.748979463	1.135589149	-0.386609686
Q99LJ0	-0.748834277	1.135623693	-0.386789417
O88935	-0.743783541	1.136803225	-0.393019684
P70335	-0.744626827	1.136609277	-0.39198245
Q08274	-0.744758519	1.136578881	-0.391820361
Q9CPR8	-0.746720858	1.136122496	-0.389401637
P49813	-0.746382853	1.136201569	-0.389818717
Q02819	-0.746402315	1.136197021	-0.389794706
Q8CHT3	-0.745800441	1.136337367	-0.390536926
Q9CQV1	-0.745413396	1.136427296	-0.391013899
Q9JI08	-0.734749387	1.138806806	-0.404057419
Q80TS3	-0.735628203	1.138617812	-0.402989609
Q9CSU0	-0.735705221	1.138601189	-0.402895968
Q5DU37	-0.735130571	1.138724985	-0.403594415
Q64299	-0.735097985	1.138731989	-0.403634005
Q9DBB8	-0.735089203	1.138733876	-0.403644673
Q99KJ8	-0.735398534	1.138667325	-0.403268792
Q9QZS3	-0.735269887	1.138695022	-0.403425135
Q62108	-0.732894526	1.139201564	-0.406307038
Q99JP4	-0.733899043	1.138988475	-0.405089433
Q80U93	-0.733661114	1.139039096	-0.405377981
Q52KF3	-0.733572233	1.139057982	-0.405485749
Q9QZU9;REV__Q8K245	-0.73351238	1.139070693	-0.405558312
P50428	-0.730353933	1.139733194	-0.409379261
Q8BGC4	-0.731295518	1.139537382	-0.408241864
Q9QZ06	-0.731393054	1.139517017	-0.408123963
Q06335	-0.731648972	1.139463508	-0.407814536
P97760	-0.731739334	1.139444589	-0.407705255
Q9JIY0	-0.731770999	1.139437957	-0.407666958
P59242	-0.728767685	1.140059835	-0.41129215
Q9DC33	-0.729195942	1.139972048	-0.410776106
Q80VP0	-0.729457457	1.139918295	-0.410460838
Q9EQI8	-0.729351035	1.139940182	-0.410589147
D3Z7Q2	-0.727786792	1.140259797	-0.412473005
Q9CXL3	-0.72673861	1.140471772	-0.413733163
Q9CPU0	-0.727279232	1.140362661	-0.413083429
Q91WN1	-0.726996857	1.14041971	-0.413422853
Q9CQC8	-0.727073152	1.140404308	-0.413331156
Q9Z1M0	-0.719530261	1.141882227	-0.422351966
Q80ZX0	-0.718593465	1.142059515	-0.42346605
Q8R079	-0.718091366	1.142153972	-0.424062607
Q9CXI0	-0.715240346	1.142682868	-0.427442522
Q9WUA2	-0.716691444	1.142415254	-0.425723809
Q8CH18	-0.717251837	1.142311029	-0.425059191
A2ASQ1	-0.717587223	1.142248417	-0.424661194
Q8R3Q2	-0.717452298	1.142273627	-0.424821329
Q7TNP2	-0.721409027	1.141522522	-0.420113495
P97311	-0.722770581	1.141258367	-0.418487786
Q3URD3	-0.722479693	1.141315048	-0.418835355
Q8K2T1	-0.722240438	1.141361568	-0.41912113
E9Q784	-0.724015014	1.141014371	-0.416999357
Q920I9	-0.72383789	1.14104925	-0.417211359
E9Q5C9	-0.726015276	1.140617028	-0.414601752
Q9D6D0	-0.726063497	1.140607371	-0.414543874
P52912	-0.725252055	1.14076939	-0.415517335
Q3V384	-0.725109153	1.140797814	-0.415688662
Q8BY87	-0.769718798	1.130278562	-0.360559764
Q5PSV9	-0.770528008	1.130055882	-0.359527874
Q62095	-0.771014704	1.12992138	-0.358906675
P13516;Q99PL7;P13011	-0.771265531	1.129851893	-0.358586362
Q8CE50	-0.77127956	1.129848004	-0.358568443
Q3UHX9	-0.774377028	1.128980374	-0.354603346
Q64471	-0.774805814	1.128858882	-0.354053068
Q3TRM8	-0.773171905	1.129320026	-0.356148121
P12023	-0.771997784	1.129648383	-0.357650599
Q8C006	-0.772532313	1.129499208	-0.356966895
P56380	-0.777349937	1.128131057	-0.35078112
Q02788	-0.77562001	1.128627256	-0.353007246
Q60994	-0.775891397	1.12854978	-0.352658383
Q8QZY1	-0.77616077	1.128472743	-0.352311973
Q04750	-0.778350946	1.127841401	-0.349490456
P70168	-0.77911573	1.127618845	-0.348503115
Q8VE04	-0.779192682	1.127596391	-0.348403709
Q5RKZ7	-0.780701625	1.127153859	-0.346452235
Q9JK42	-0.781032804	1.127056163	-0.346023359
P34884	-0.780292138	1.127274372	-0.346982234
Q05512	-0.779815402	1.12741428	-0.347598878
Q501P1	-0.751740811	1.134925288	-0.383184478
Q8VHX6	-0.754020889	1.134367279	-0.380346389
Q9CWG8	-0.754347522	1.134286607	-0.379939086
Q01063;O89084	-0.752967478	1.134626195	-0.381658717
Q8CBW7	-0.753058365	1.134603931	-0.381545566
Q8K2M0	-0.75329824	1.134545103	-0.381246863
Q8K2X3	-0.753395702	1.134521173	-0.381125471
Q6WVG3;Q8C7J6	-0.755835226	1.133916841	-0.378081615
Q8K2C6	-0.755775388	1.133931788	-0.378156401
A3KGB4	-0.759128603	1.133084589	-0.373955986
Q6PHQ8	-0.758556333	1.133230564	-0.374674231
Q61024	-0.757256871	1.133559905	-0.376303034
Q80YR5	-0.757901208	1.13339697	-0.375495762
P17665	-0.766715747	1.131094607	-0.36437886
Q91WL8	-0.766458534	1.131163747	-0.364705214
Q8R409	-0.766047111	1.131274094	-0.365226983
Q9CQX2	-0.765781165	1.131345261	-0.365564095
P22599	-0.765670631	1.131374802	-0.365704171
Q9QZM0	-0.76565771	1.131378254	-0.365720544
Q3UH93	-0.768421957	1.130632958	-0.362211001
A2AB59	-0.767332765	1.130928265	-0.3635955
Q62418	-0.767270205	1.130945161	-0.363674956
Q9JHW2	-0.767673558	1.130836097	-0.363162539
Q62421	-0.767825167	1.130795027	-0.36296986
Q9D1B9	-0.767896728	1.130775627	-0.362878899
Q9D6Z1	-0.762413337	1.132235581	-0.369822244
E9PX68	-0.763273966	1.132009983	-0.368736017
Q91VR5	-0.763257387	1.132014342	-0.368756954
Q3TUH1	-0.760688212	1.132683845	-0.371995633
Q6PIU9	-0.760342534	1.132773036	-0.372430503
Q8CC21	-0.761753182	1.13240774	-0.370654558
P26350	-0.761147127	1.132565112	-0.371417985
Q99KR3	-0.761327505	1.132518341	-0.371190836
Q9CWI3	-0.761348753	1.132512828	-0.371164076
A2CG49;Q9CWR0	-0.789054492	1.124626388	-0.335571896
Q9CWK3	-0.788766874	1.124715631	-0.335948757
O35632	-0.786448255	1.12542926	-0.338981005
Q9JLI2	-0.786559482	1.125395262	-0.33883578
Q3TQB2	-0.787752173	1.125029207	-0.337277034
Q3U3E2	-0.787491961	1.125109302	-0.337617341
Q6IR34	-0.78530888	1.125776171	-0.34046729
Q9R269	-0.784374332	1.126058872	-0.341684539
Q8C1F4	-0.782943216	1.126488574	-0.343545358
P35330	-0.782037532	1.126758512	-0.34472098
Q9CR89	-0.781828083	1.126820718	-0.344992635
Q80SY4	-0.795786081	1.122491816	-0.326705734
B2KF50	-0.796130906	1.122380084	-0.326249179
Q63850	-0.79615131	1.122373466	-0.326222156
P70261	-0.796693959	1.122197138	-0.325503179
Q61142	-0.79658731	1.122231838	-0.325644529
P83917	-0.7969723	1.122106468	-0.325134168
Q8VE80	-0.797085325	1.122069606	-0.324984282
Q99J78	-0.797560885	1.121914231	-0.324353347
Q8BJ05	-0.798105741	1.121735664	-0.323629923
B1AWC9	-0.798139098	1.121724712	-0.323585615
Q69ZZ6;Q80W04	-0.798158354	1.121718389	-0.323560035
Q3UHH2	-0.798938445	1.121461619	-0.322523174
Q80V86	-0.799434521	1.121297703	-0.321863182
Q924A2	-0.799708995	1.121206799	-0.321497803
Q8R054	-0.790445701	1.124192463	-0.333746761
Q99JF8	-0.791369475	1.123902264	-0.332532788
Q3UPF5	-0.791174639	1.123963608	-0.332788969
Q8R4R6	-0.791213585	1.123951352	-0.332737767
Q8BH15	-0.792699515	1.123481526	-0.330782012
Q8BX09	-0.792935659	1.123406466	-0.330470807
P31230	-0.794960485	1.122758376	-0.327797891
Q6PB44	-0.794667301	1.122852713	-0.328185412
Q9Z0U1	-0.794190886	1.123005649	-0.328814763
O08749	-0.793711486	1.123159094	-0.329447608
Q6P5C5	-0.793705943	1.123160866	-0.329454922
Q8BP56	-0.816085191	1.115505472	-0.299420281
Q8BNJ2	-0.815624623	1.115673425	-0.300048802
Q9D051	-0.815755197	1.115625854	-0.299870657
Q8BG09	-0.817962038	1.114816395	-0.296854357
Q8BMF3	-0.817906133	1.114837029	-0.296930896
E9Q137	-0.818750573	1.11452465	-0.295774077
P62196	-0.81855199	1.114598247	-0.296046257
Q2VPA6	-0.821971567	1.113319079	-0.291347512
P70452	-0.822316319	1.113188717	-0.290872398
Q80X73	-0.822498249	1.11311982	-0.290621571
Q60902	-0.823650302	1.112681866	-0.289031564
Q78T54	-0.823197678	1.112854276	-0.289656598
Q9CXW2	-0.822890174	1.112971153	-0.290080979
Q5SSM3	-0.819632076	1.114196933	-0.294564857
Q8CFE3	-0.819631143	1.11419728	-0.294566137
Q9DCB1	-0.819979605	1.114067274	-0.294087669
Q9Z315	-0.820016422	1.114053523	-0.294037101
Q6A065	-0.821397146	1.113535714	-0.292138568
Q3TBT3	-0.820604546	1.113833462	-0.293228917
Q9D7X1	-0.820551398	1.11385338	-0.293301982
Q07797	-0.808907958	1.11807218	-0.309164222
Q3U0V1	-0.809073928	1.118014037	-0.308940109
Q8CC35	-0.80912792	1.117995111	-0.308867191
Q8R326	-0.810116205	1.117647606	-0.307531402
Q9Z351	-0.809523967	1.117856094	-0.308332127
P18572	-0.811427891	1.117183258	-0.305755367
Q9D3S3	-0.81186063	1.11702928	-0.30516865
Q8VEE1	-0.813372322	1.116488316	-0.303115994
Q9CPU2	-0.813328836	1.116503945	-0.303175109
O54824	-0.812608516	1.116762244	-0.304153728
O89029	-0.812550086	1.116783149	-0.304233062
A0A571BEN1	-0.81288153	1.116664472	-0.303782942
Q8BSS9	-0.812797542	1.116694566	-0.303897024
E9Q4N7	-0.806896816	1.118772213	-0.311875398
Q99KI0	-0.804882142	1.119465166	-0.314583024
Q9Z2M7	-0.802839243	1.120159395	-0.317320152
E9Q1P8	-0.803537065	1.119923208	-0.316386143
Q3TMW1	-0.803313355	1.119999033	-0.316685678
Q6S5C2	-0.803172764	1.120046634	-0.31687387
Q9CZU3	-0.801891858	1.120478476	-0.318586618
Q5RJH6	-0.800257031	1.121024842	-0.320767811
Q8K363	-0.801313207	1.120672477	-0.319359271
Q99LC5	-0.800938785	1.120797649	-0.319858864
Q9CQU8	-0.800759929	1.120857342	-0.320097414
Q9Z172	-0.800802263	1.120843219	-0.320040956
Q62084	-0.569614314	1.15466614	-0.585051826
Q8CIG3	-0.571038644	1.154677622	-0.583638978
P21836	-0.570655738	1.154674763	-0.584019025
Q9ER69	-0.570287166	1.154671852	-0.584384686
Q8BVL3	-0.570410319	1.154672842	-0.584262523
Q99JX7	-0.570520107	1.15467371	-0.584153603
P81069;Q00420	-0.573970165	1.154693955	-0.58072379
Q03350	-0.572278946	1.154685733	-0.582406787
Q8K3A0	-0.572212519	1.154685343	-0.582472824
P31324	-0.572739287	1.154688296	-0.581949008
Q8R2V2	-0.572938504	1.154689329	-0.581750826
Q923Z0	-0.573111376	1.15469019	-0.581578813
P11214	-0.562777204	1.154578939	-0.591801735
Q99MZ7	-0.562352456	1.154571778	-0.592219322
Q9CQG2	-0.562124328	1.154567848	-0.59244352
Q8R3R5;A2AF53	-0.560267813	1.154533691	-0.594265878
Q8CFD4	-0.56124359	1.154552127	-0.593308537
O08797;Q8VHQ1;Q8BMT0;Q80UK5;O08806;F6V5V4	-0.564753892	1.154609588	-0.589855695
Q99M71	-0.564720325	1.154609104	-0.589888779
P70175	-0.564495467	1.154605831	-0.590110364
Q8BLR2	-0.564561569	1.154606799	-0.59004523
Q60749	-0.566660033	1.15463496	-0.587974928
Q3UEB3	-0.567545269	1.154645344	-0.587100075
Q99KN1	-0.567737062	1.154647476	-0.586910414
P51125	-0.554229151	1.154395908	-0.600166757
P50295	-0.553072117	1.154364872	-0.601292755
Q80W22	-0.553139547	1.154366721	-0.601227174
O70494	-0.552798991	1.154357329	-0.601558338
Q9CZT5	-0.552902382	1.154360194	-0.601457812
D3Z0M9	-0.556575202	1.154454271	-0.597879069
O35841	-0.555458175	1.154427246	-0.598969071
Q61189	-0.555779195	1.154435155	-0.59865596
Q9JIA7	-0.558981249	1.154507751	-0.595526503
P20065	-0.55793877	1.154485374	-0.596546604
Q8BIG4	-0.557602192	1.154477889	-0.596875698
O35367	-0.544482793	1.154088246	-0.609605453
Q8R0F6	-0.541851784	1.153987319	-0.612135535
Q99J31	-0.542242501	1.154002784	-0.611760283
Q8C4Q6	-0.547486518	1.154194214	-0.606707696
P35456	-0.550297868	1.154284414	-0.603986546
Q62205	-0.549037928	1.154245066	-0.605207139
Q810U4	-0.606862405	1.154188816	-0.547326411
Q99M08	-0.606566075	1.154199131	-0.547633055
O88967	-0.607462468	1.1541676	-0.546705132
Q9JHW4	-0.607499953	1.15416626	-0.546666307
P82343	-0.607212933	1.154176476	-0.546963542
Q8VDM6	-0.607040758	1.154182556	-0.547141798
Q91W89	-0.604777429	1.154259125	-0.549481696
Q99PT1	-0.602432017	1.154331914	-0.551899897
Q9R1Q7	-0.603615715	1.154296011	-0.550680295
Q3UMC0;Q9D3R6	-0.602957344	1.154316189	-0.551358846
Q99N92	-0.60320924	1.154308531	-0.551099291
Q8CIH9	-0.600959086	1.154374228	-0.553415142
Q8CBC7	-0.601796724	1.154350486	-0.552553762
P97480	-0.601609146	1.154355876	-0.55274673
Q3TIU4	-0.601577567	1.154356779	-0.552779212
Q91W67	-0.598369676	1.154442284	-0.556072607
P97817	-0.598196564	1.154446546	-0.556249982
Q3UFS0	-0.59813156	1.154448138	-0.556316578
Q640M1;Q6EJB6	-0.599441011	1.154415103	-0.554974092
Q9Z1Z0;REV__P18872	-0.599745593	1.154407125	-0.554661532
A1L3P4	-0.594687584	1.154525224	-0.55983764
Q69ZU6	-0.594276533	1.15453348	-0.560256946
Q80Z24	-0.594361199	1.154531796	-0.560170597
Q3UDW8	-0.59389282	1.154541005	-0.560648184
Q9ER58	-0.593301615	1.154552256	-0.561250641
Q99LD8	-0.595149528	1.154515707	-0.559366179
Q60847	-0.595878802	1.154500164	-0.558621362
Q9Z2N8;Q99MR0	-0.595632372	1.154505487	-0.558873115
Q8VDL4	-0.597182187	1.154470803	-0.557288616
P52432	-0.596377794	1.154489163	-0.558111369
Q61124	-0.596608939	1.154483966	-0.557875027
O88796	-0.590414135	1.154601251	-0.564187116
Q8VED9	-0.591670162	1.154581152	-0.56291099
Q9QXT0	-0.592824825	1.154561027	-0.561736202
P82349	-0.592383761	1.154568901	-0.562185141
O88291	-0.592512063	1.154566635	-0.562054571
Q9Z1Y4	-0.592454947	1.154567646	-0.562112699
Q8VEL2	-0.586173468	1.154655361	-0.568481893
Q8VBV7	-0.586895458	1.154647643	-0.567752185
Q9DBT5	-0.586900899	1.154647582	-0.567746684
Q8BYB9	-0.587811764	1.154636965	-0.566825201
Q60932	-0.588777761	1.15462464	-0.565846879
Q80ZI6	-0.588320474	1.154630611	-0.566310137
P58468	-0.581196025	1.15469198	-0.573495956
Q99ME2	-0.583465826	1.154678869	-0.571213043
Q9R207	-0.58357006	1.154678122	-0.571108063
Q99P30	-0.578250682	1.15470007	-0.576449388
Q61136	-0.578487526	1.154699791	-0.576212266
Q8CG47	-0.578503142	1.154699771	-0.576196629
Q80UG5;REV__Q6NSQ7	-0.578952022	1.154699056	-0.575747034
Q9R190	-0.579383354	1.154698149	-0.575314795
Q3UFY7	-0.577094066	1.1547005	-0.577606434
P25785	-0.577299745	1.154700537	-0.577400792
Q9Z1R2	-0.57732678	1.154700538	-0.577373758
Q91V24	-0.575868865	1.154699272	-0.578830407
P22907	-0.576244299	1.154699833	-0.578455534
Q9D8X1	-0.576459507	1.154700081	-0.578240573
P60764;Q9ER71	-0.692678912	1.14643129	-0.453752378
Q7TT37	-0.691531741	1.146601614	-0.455069873
Q80XB4	-0.691809315	1.146560578	-0.454751264
Q923U0	-0.690730731	1.146719403	-0.455988672
Q9JJ94	-0.691040174	1.14667401	-0.455633836
Q8BYK6	-0.688715352	1.147011632	-0.45829628
B8ZXI1	-0.689927979	1.146836509	-0.45690853
P08030	-0.689657725	1.146875723	-0.457217998
Q9R022	-0.687241328	1.147221633	-0.459980305
Q99JP6	-0.687429112	1.147195055	-0.459765943
Q9JJV2	-0.687354323	1.147205646	-0.459851323
Q80TQ2	-0.687921218	1.147125161	-0.459203943
Q07235;A2RSF9	-0.687631489	1.147166354	-0.459534865
Q9JJ28	-0.687563503	1.147176002	-0.459612499
Q8VC34	-0.686222323	1.147364972	-0.461142649
Q61107	-0.686998179	1.147255972	-0.460257793
Q80TP3	-0.686691076	1.147299221	-0.460608145
Q9JME7	-0.686842294	1.147277942	-0.460435649
Q8BQ30	-0.679217261	1.148310018	-0.469092757
Q6GV12	-0.678287507	1.148430194	-0.470142687
Q9CZN7;P50431	-0.678242057	1.148436038	-0.470193981
A1IGU4	-0.684915004	1.147546676	-0.462631672
Q64700	-0.683364481	1.147758998	-0.464394518
B2RXC6	-0.684078254	1.147661686	-0.463583431
Q6NXL5	-0.683867107	1.147690548	-0.463823441
Q9CQR2	-0.683907528	1.147685028	-0.4637775
Q8BR63	-0.656621663	1.150889699	-0.494268037
Q8VDR9	-0.661582988	1.150383443	-0.488800455
Q9JMC3	-0.661528718	1.150389161	-0.488860443
P35290	-0.662305911	1.150306885	-0.488000974
Q9CXT8	-0.662329548	1.15030437	-0.487974821
Q62433	-0.66191131	1.150348762	-0.488437452
Q9D5V6	-0.661961964	1.150343398	-0.488381434
Q6NZL0	-0.660164402	1.150531603	-0.490367201
Q9Z1D1	-0.660445598	1.150502452	-0.490056854
Q05895	-0.65951794	1.150598214	-0.491080275
Q8R3G1	-0.659840951	1.150565002	-0.490724051
Q8BP40	-0.668931685	1.149571848	-0.480640163
A6H6J9	-0.666576118	1.149840084	-0.483263966
Q9ESC7;Q65Z95	-0.666650531	1.149831727	-0.483181196
Q8BT51	-0.66621778	1.149880218	-0.483662438
Q9Z0X0	-0.666373703	1.149862776	-0.483489073
Q91WE2	-0.671108883	1.149317091	-0.478208208
Q9CQ85	-0.670779459	1.149356061	-0.478576602
Q9CZ44	-0.672701641	1.149126544	-0.476424903
P62814;Q91YH6	-0.672290366	1.149176085	-0.47688572
Q8VHH5	-0.672097069	1.149199288	-0.477102218
Q9CQJ2	-0.671964214	1.149215205	-0.47725099
A6H5Y3	-0.674077939	1.148959039	-0.4748811
Q9D415	-0.67406958	1.148960064	-0.474890484
O35144	-0.673345461	1.149048516	-0.475703055
P23949	-0.6734355	1.149037558	-0.475602058
P40336	-0.673419637	1.149039489	-0.475619852
Q8VDD9	-0.676114861	1.148706258	-0.472591397
Q3THG9	-0.675657564	1.148763516	-0.473105952
Q80YX1	-0.675341426	1.148802927	-0.473461502
Q78JE5	-0.643273713	1.152088058	-0.508814345
O09111	-0.643658244	1.152056831	-0.508398587
Q8BH50	-0.643879083	1.15203881	-0.508159727
Q9D6F9	-0.643938239	1.152033971	-0.508095732
Q6WQJ1	-0.642442506	1.152154896	-0.50971239
Q8C0V0	-0.641411855	1.152236519	-0.510824664
Q9CZ91	-0.637847925	1.152508102	-0.514660177
Q8R4K2	-0.637285215	1.152549476	-0.515264261
Q9WUR2;Q78JN3	-0.637318247	1.152547059	-0.515228812
Q91X83	-0.640111844	1.152337497	-0.512225654
O89020	-0.63858873	1.152453009	-0.513864278
Q9Z2M6	-0.639279136	1.152401022	-0.513121886
Q9ET80	-0.654170171	1.151127585	-0.496957414
Q8K3R3	-0.653328172	1.151207429	-0.497879257
Q9JIH2	-0.652834602	1.151253792	-0.49841919
Q3U5F4	-0.651966458	1.15133455	-0.499368092
Q924X2	-0.651797732	1.151350129	-0.499552397
Q80UP3	-0.651200301	1.151404986	-0.500204684
Q8BK08	-0.650561714	1.151463096	-0.500901382
P54116	-0.650872012	1.151434927	-0.500562916
S4R1W1	-0.65076949	1.151444248	-0.500674758
P38060;Q8JZS7	-0.645195469	1.151930059	-0.50673459
Q5SUC9	-0.646505806	1.151819546	-0.50531374
Q6SKR2	-0.645898832	1.151871019	-0.505972187
Q8VCC8	-0.645944602	1.151867155	-0.505922553
Q8BFQ8	-0.648902994	1.151611505	-0.502708511
Q8BKR5	-0.648576663	1.151640272	-0.50306361
Q9CXU0	-0.648303625	1.151664234	-0.503360609
Q8BVW0	-0.647190811	1.151760872	-0.504570062
Q8R0K9	-0.647924722	1.151697322	-0.5037726
O55098	-0.62645355	1.153266633	-0.526813083
Q60967	-0.626036057	1.153291283	-0.527255225
Q8BN59	-0.626156241	1.153284209	-0.527127968
Q9JLI6	-0.626210315	1.153281021	-0.527070706
O70146	-0.623813674	1.153418795	-0.52960512
Q922H1	-0.624686583	1.153369453	-0.528682871
Q99LB2	-0.633716405	1.152802362	-0.519085957
P38647	-0.633640787	1.152807543	-0.519166757
Q64674	-0.633646627	1.152807144	-0.519160516
P08121	-0.628841593	1.153121392	-0.524279798
P08775	-0.630788834	1.152997596	-0.522208762
Q8JZQ2	-0.630472029	1.153018066	-0.522546037
Q80UP8	-0.620335352	1.1536059	-0.533270549
P10649	-0.621158162	1.153563009	-0.532404847
P40749	-0.62103239	1.15356962	-0.532537231
Q6ZWZ2	-0.616318558	1.153803162	-0.537484603
Q8BHG1	-0.616365683	1.153800964	-0.53743528
Q9D2E2	-0.618541937	1.153696456	-0.535154519
Q9D6T0	-0.618762916	1.153685515	-0.534922598
P63154	-0.613352791	1.153935957	-0.540583167
Q921E2	-0.612882671	1.15395601	-0.541073339
E9PUR0	-0.613870361	1.153913566	-0.540043204
P35486;P35487	-0.614456341	1.153887815	-0.539431474
F8VQK3	-0.61162784	1.154008201	-0.542380362
Q921S7	-0.610151758	1.154067118	-0.54391536
Q9Z138	-0.610363026	1.154058849	-0.543695824
Q7TPV4	-0.609734471	1.154083289	-0.544348819
Q8K4Z5	-0.609301856	1.154099829	-0.544797973
Q6P3D0	-0.360198389	1.130200684	-0.770002295
E9Q6E5	-0.359664236	1.130085362	-0.770421126
Q924T3	-0.359561499	1.130063153	-0.770501654
Q9Z131	-0.362985792	1.130798424	-0.767812632
P97825	-0.362088058	1.130606654	-0.768518596
Q9JHI7	-0.362457438	1.130685645	-0.768228207
Q921N6	-0.367088362	1.131665798	-0.764577436
Q9Z1X4;Q91WM1	-0.36713185	1.131674913	-0.764543063
Q8BH58	-0.365906104	1.131417359	-0.765511255
Q8CBW3	-0.366507192	1.131543825	-0.765036633
Q8BMZ5	-0.372191405	1.132724018	-0.760532613
Q9CR41	-0.373070353	1.132903965	-0.759833612
Q8BHW2	-0.370569615	1.132390198	-0.761820583
Q8BMS4	-0.369114794	1.132088769	-0.762973975
Q64430	-0.380122898	1.134323032	-0.754200134
Q3THK7	-0.381049059	1.134506103	-0.753457044
Q5RJG7	-0.381294626	1.134554515	-0.753259889
Q3URQ7	-0.376248181	1.133548852	-0.757300671
Q8CG70	-0.37656841	1.13361334	-0.757044931
P0C028;P0C027	-0.37805003	1.133910527	-0.755860497
Q6PHU5	-0.377688438	1.133838178	-0.75614974
Q922E6	-0.377430076	1.133786413	-0.756356337
Q924Z6	-0.377505463	1.133801523	-0.756296061
Q64337	-0.390295545	1.136291779	-0.745996234
Q8BJQ9	-0.390361499	1.13630424	-0.745942741
Q8BGC0	-0.388744901	1.135997669	-0.747252767
Q9DAM7	-0.388752079	1.135999035	-0.747246956
P82347	-0.387403544	1.135741511	-0.748337968
Q9JHP7	-0.387933169	1.135842846	-0.747909677
Q689Z5	-0.385171646	1.135311712	-0.750140066
Q8VCA8	-0.386187054	1.135507804	-0.74932075
Q99JF5	-0.385953119	1.135462709	-0.74950959
G3X8U3	-0.382730871	1.134836585	-0.752105714
Q8R2N2	-0.384110797	1.135105859	-0.750995063
Q9JJK2	-0.384462785	1.135174273	-0.750711488
P51910	-0.411768686	1.140140685	-0.728371999
O55236	-0.410343453	1.139898258	-0.729554805
O88974	-0.410889301	1.139991325	-0.729102024
Q91YE8	-0.407324085	1.139378515	-0.73205443
Q8BUL6	-0.406561789	1.139245976	-0.732684187
Q91X84	-0.406407469	1.13921908	-0.732811611
Q60876	-0.408326213	1.139551944	-0.731225732
Q9DAT5	-0.409460754	1.139747178	-0.730286424
Q8CI08	-0.393825904	1.136953306	-0.743127403
Q9QYF9	-0.39315501	1.136828458	-0.743673447
Q8BI06	-0.392934222	1.136787281	-0.743853059
Q91WK0	-0.39299876	1.136799322	-0.743800562
Q9CPY7	-0.395251573	1.137217264	-0.741965692
Q05685	-0.396172764	1.137386843	-0.741214079
Q64739	-0.39587677	1.137332438	-0.741455669
Q80YV4	-0.395952855	1.137346431	-0.741393575
P70296;Q8VIN1	-0.397148593	1.137565642	-0.740417048
P97386	-0.397372009	1.137606456	-0.740234447
P16332	-0.398758134	1.137858669	-0.739100535
O88207;REV__Q3TTA7	-0.398610782	1.13783194	-0.739221158
Q9JI91	-0.398501549	1.137812113	-0.739310564
Q9QYC0	-0.400449111	1.13816399	-0.737714879
O70209	-0.402374685	1.138508504	-0.736133819
P57716	-0.402326898	1.138499995	-0.736173097
Q64152	-0.433522525	1.143607348	-0.710084822
Q6KAR6	-0.435652023	1.143922921	-0.708270898
Q8VBT9	-0.435042234	1.143832993	-0.708790758
Q93092	-0.435037172	1.143832245	-0.708795073
P22682	-0.430846121	1.14320467	-0.712358549
Q6IRU2	-0.430493403	1.1431511	-0.712657697
Q8BM72	-0.428631912	1.142866446	-0.714234534
Q9CRB2	-0.429398301	1.142984034	-0.713585732
P10404;P11370	-0.417045084	1.141021898	-0.723976814
P21460	-0.416245561	1.140890021	-0.724644459
P47911	-0.416155098	1.140875062	-0.724719964
Q9Z0J0	-0.418099116	1.141194851	-0.723095735
O08795	-0.419226594	1.141378717	-0.722152123
P30561	-0.418619161	1.141279805	-0.722660643
Q9D7P6	-0.418902526	1.141325989	-0.722423463
E9QAM5	-0.421540232	1.141752326	-0.720212094
Q3TYX3	-0.421453206	1.141738363	-0.720285156
Q8R2U6	-0.422250459	1.141866016	-0.719615557
B2RUJ5;P98084	-0.42207455	1.141837901	-0.719763351
P57780	-0.422005211	1.141826811	-0.7198216
Q8CHR6	-0.426595148	1.142551272	-0.715956124
Q9EPX2	-0.426647285	1.142559388	-0.715912103
O35526	-0.427168136	1.14264033	-0.715472194
Q9WU20	-0.427028644	1.142618677	-0.715590033
P28481	-0.423631707	1.142085778	-0.718454071
Q9CWZ7	-0.423613007	1.142082815	-0.718469808
Q149F3	-0.425331651	1.142353805	-0.717022154
Q62393	-0.424615269	1.142241183	-0.717625914
O35393	-0.501858548	1.15154212	-0.649683572
O08997	-0.501665181	1.151526231	-0.649861051
Q9ER72	-0.501480276	1.151511002	-0.650030726
P70353	-0.502938606	1.15163016	-0.648691555
Q9CRT8	-0.502506817	1.151595107	-0.64908829
Q61216	-0.504429803	1.151749743	-0.64731994
Q99PM9	-0.506905715	1.151943229	-0.645037514
Q62440	-0.506327325	1.151898596	-0.64557127
Q8VC30	-0.505913612	1.151866458	-0.645952846
Q8BPG6	-0.514044739	1.152465558	-0.63842082
Q9CQF3	-0.516441639	1.152629018	-0.636187379
O55229	-0.515839728	1.152588535	-0.636748807
Q9CZ42	-0.515562788	1.152569782	-0.637006993
Q3TAS6	-0.510998332	1.152249147	-0.641250815
Q8CH02	-0.508042529	1.152029946	-0.643987416
A2A8U2	-0.50826123	1.152046475	-0.643785245
Q91WJ8	-0.508326607	1.152051406	-0.643724799
O35286	-0.508905236	1.15209486	-0.643189625
Q8C0D9	-0.509218864	1.152118268	-0.642899405
Q3V3V9	-0.526288893	1.153237139	-0.626948246
B9EJA2	-0.524810468	1.153152381	-0.628341913
Q9D8U8	-0.524053283	1.153108073	-0.62905479
Q8VHC3	-0.519030467	1.1527988	-0.633768333
Q6IRU5	-0.518473935	1.152762896	-0.63428896
Q9CY28	-0.518473623	1.152762875	-0.634289253
O08585	-0.522165213	1.152994944	-0.630829731
Q8BT60	-0.520879477	1.152915748	-0.632036271
Q8CFX3	-0.520145942	1.152869784	-0.632723842
Q9CQH3	-0.530002707	1.153439786	-0.623437079
Q01149	-0.532347859	1.153560158	-0.621212299
P49586	-0.531340942	1.153509197	-0.622168254
Q8R0H9	-0.531437692	1.15351414	-0.622076448
P11983	-0.537113646	1.153786566	-0.616672921
Q9DB52	-0.538117212	1.153831119	-0.615713907
Q9CV28	-0.533848537	1.153634088	-0.619785552
Q6DG52	-0.535003383	1.153689333	-0.61868595
Q8BMI3	-0.534407195	1.153660992	-0.619253797
Q921X6	-0.53460459	1.153670418	-0.619065828
Q8CFI0	-0.478825114	1.149382272	-0.670557158
P97287	-0.477489096	1.149240634	-0.671751538
Q3TXT3	-0.476979583	1.14918615	-0.672206567
Q9Z2U1	-0.482053328	1.149717173	-0.667663845
Q60972	-0.480938657	1.14960271	-0.668664053
Q8BKN5	-0.48080655	1.149589062	-0.668782512
Q80Y20	-0.48452845	1.149966894	-0.665438445
Q9CQ48	-0.484464259	1.149960495	-0.665496237
P58462	-0.48368497	1.149882483	-0.666197513
Q08122;Q9WVB2;Q62441	-0.482898485	1.149803133	-0.666904647
Q9JHL1	-0.492823734	1.150758911	-0.657935177
O08811	-0.490936348	1.150584811	-0.659648463
Q9D1K2	-0.490066751	1.150503383	-0.660436632
Q3U492	-0.498148	1.151230543	-0.653082543
Q9WTS6	-0.498233981	1.151237922	-0.653003941
Q8BGR8	-0.499470958	1.151343249	-0.651872291
Q8C1B7	-0.499209768	1.15132114	-0.652111372
Q99KK7	-0.499322571	1.151330697	-0.652008126
Q91WL6	-0.494884725	1.150944898	-0.656060173
Q9D4J1	-0.494799993	1.150937337	-0.656137344
Q8VIK5	-0.496838806	1.151117249	-0.654278443
Q3UHK8	-0.496164984	1.151058257	-0.654893273
Q9CQ20	-0.496234706	1.151064382	-0.654829676
Q810A7	-0.458886273	1.147085519	-0.688199246
Q8CEI1	-0.457840989	1.146954384	-0.689113395
Q91WS0	-0.458246891	1.147005431	-0.68875854
Q8BHD7	-0.461552497	1.147415201	-0.685862704
Q9ERR1	-0.460093293	1.147235624	-0.687142332
Q61315	-0.470358375	1.148454748	-0.678096373
Q7TMR0	-0.471354875	1.148567593	-0.677212718
Q8K2I3	-0.466594884	1.148019755	-0.681424872
O35242	-0.466950838	1.148061493	-0.681110655
O35654	-0.466790557	1.148042714	-0.681252157
Q9DB40	-0.46452003	1.147774	-0.68325397
Q8K3D3	-0.463964555	1.147707492	-0.683742937
Q9WUT3	-0.463979285	1.14770926	-0.683729975
P97452	-0.463094401	1.147602702	-0.684508301
Q8K3I9	-0.462515126	1.147532532	-0.685017406
M0QWN7	-0.452732398	1.146298279	-0.693565881
Q9CR26	-0.452617832	1.146283276	-0.693665444
Q8CGA2	-0.450598967	1.146016828	-0.69541786
P18155	-0.45020646	1.14596457	-0.69575811
Q8CFI5	-0.450111114	1.145951853	-0.695840739
E9QAE3	-0.45014427	1.145956276	-0.695812007
Q8BVD5	-0.450130962	1.145954501	-0.695823539
Q04690	-0.448642033	1.145754815	-0.697112782
Q9ER00	-0.447982348	1.145665662	-0.697683314
Q80XK6	-0.443334741	1.145025768	-0.701691027
O88839	-0.443807201	1.145091759	-0.701284558
Q9Z1T2	-0.444009746	1.145119985	-0.701110238
Q3TYS2	-0.445258622	1.145293155	-0.700034533
Q9D8W7	-0.446012415	1.145396957	-0.699384541
Q9JKS5	-0.446311683	1.145438017	-0.699126334
Q3UX10	-0.441855753	1.144817816	-0.702962063
Q9WU84	-0.440685282	1.144651768	-0.703966486
Q8BVF2	-0.438571966	1.144348669	-0.705776703
O35435	-0.439298293	1.144453319	-0.705155026
Q8BTY1	-0.439874034	1.144535917	-0.704661883
Q9D1T0	-0.272019153	1.107865628	-0.835846475
Q9WTP7	-0.271517861	1.107720112	-0.836202251
P29268	-0.271203107	1.10762864	-0.836425532
Q62226;P97812	-0.271200785	1.107627964	-0.836427179
P28659	-0.276373018	1.109120835	-0.832747817
Q78ZA7	-0.275094657	1.108753896	-0.833659239
Q8VEG4	-0.274619873	1.108617274	-0.833997401
Q921M7	-0.260077589	1.104343539	-0.84426595
Q9CWR1	-0.259836209	1.104271151	-0.844434941
Q7M6Y3	-0.25936273	1.104129019	-0.844766289
Q61033	-0.258998904	1.104019681	-0.845020776
Q7TNG8	-0.259123909	1.10405726	-0.84493335
Q3TGF2	-0.26306478	1.105235472	-0.842170691
Q3UW53	-0.265983668	1.106100007	-0.840116339
Q8BS45	-0.266305574	1.106194927	-0.839889353
Q3V3N7	-0.24716707	1.100405591	-0.853238521
Q9JL35	-0.246780606	1.10028564	-0.853505034
Q3UD01	-0.248954953	1.100958953	-0.852004
Q61140	-0.249790643	1.101216721	-0.851426078
Q80Y55	-0.250320816	1.101379962	-0.851059146
P30275	-0.255024216	1.102818207	-0.847793991
Q99L47	-0.256055842	1.103131277	-0.847075435
Q6PFY1	-0.251477406	1.101735289	-0.850257883
Q9ESV0	-0.25295341	1.102187179	-0.849233769
P70377	-0.252749122	1.10212474	-0.849375617
Q8VHM5	-0.252828033	1.102148862	-0.84932083
Q03265	-0.23168917	1.095507841	-0.863818672
Q8VIM9	-0.232349539	1.09572072	-0.863371181
P54320	-0.232990592	1.095927038	-0.862936447
Q8C013	-0.232715051	1.095838398	-0.863123346
Q9QYG0	-0.234103753	1.096284522	-0.862180769
O35711	-0.236027805	1.096900084	-0.860872279
Q91VF6	-0.235483534	1.096726256	-0.861242721
Q9Z120	-0.235423794	1.096707161	-0.861283368
P35283	-0.239549833	1.098019215	-0.858469382
Q80YQ2	-0.237262926	1.097293676	-0.86003075
P42932	-0.237215684	1.097278645	-0.86006296
Q8BZB2	-0.237228817	1.097282824	-0.860054006
D3YZG8	-0.238155379	1.097577312	-0.859421933
Q3U0S6	-0.238469792	1.097677086	-0.859207294
Q8BYP3	-0.24094473	1.0984597	-0.85751497
P13597	-0.242106179	1.098825276	-0.856719097
Q5SSI6	-0.241405118	1.098604741	-0.857199622
Q6Q899	-0.241596281	1.098664915	-0.857068634
Q9DCL2	-0.241771406	1.098720014	-0.856948609
O08528	-0.243573929	1.099285714	-0.855711785
O08807	-0.244893699	1.099698254	-0.854804554
Q91ZR2	-0.283008783	1.111004016	-0.827995233
P21995	-0.281621033	1.110613175	-0.828992141
Q91YD3	-0.280666113	1.110343314	-0.829677201
Q91ZJ5	-0.289462647	1.112800811	-0.823338163
Q9D8U0	-0.285420034	1.111679342	-0.826259308
P58137	-0.293581003	1.113929398	-0.820348395
Q8JZV9	-0.296277235	1.114660656	-0.81838342
Q99P31	-0.296522142	1.114726779	-0.818204637
P11881	-0.297825291	1.115077783	-0.817252491
Q8VE33	-0.297513356	1.114993891	-0.817480535
P11087;CON__Q862S4	-0.300397787	1.115766539	-0.815368751
P63323	-0.302194164	1.116244229	-0.814050065
Q99JY3	-0.301774139	1.116132778	-0.814358638
Q8R3D1	-0.307519335	1.11764446	-0.810125125
O54825	-0.307234968	1.117570287	-0.810335319
P63242	-0.307184453	1.117557103	-0.81037265
P48759	-0.303175653	1.116504089	-0.813328435
Q8C8T8	-0.303595851	1.116615094	-0.813019243
Q810S1	-0.304760489	1.116921992	-0.812161503
Q9D7X8	-0.30449968	1.116853364	-0.812353684
O35405	-0.305855804	1.117209588	-0.811353784
Q9QZ08	-0.305346348	1.117075945	-0.811729598
Q8C3I8	-0.315531376	1.119706415	-0.804175039
Q9DBS2	-0.31476488	1.119511487	-0.804746607
Q8BVZ5	-0.310344287	1.118377634	-0.808033347
Q3TWW8	-0.311856365	1.11876732	-0.806910956
Q8K1J6	-0.312240244	1.118865946	-0.806625703
P47791	-0.328642734	1.122963878	-0.794321145
P55194	-0.32823782	1.122865462	-0.794627641
Q9ER73	-0.327115297	1.122591896	-0.795476598
O88622	-0.326115148	1.12234725	-0.796232102
Q8VHR5	-0.325646862	1.122232411	-0.796585549
P57776	-0.322260715	1.121396479	-0.799135763
Q3U962	-0.323307969	1.121656051	-0.798348082
Q8BX10	-0.320586581	1.120979599	-0.800393018
B1AVZ0	-0.318493243	1.120454997	-0.801961754
Q9D0J8	-0.318738057	1.12051654	-0.801778483
Q9CRA8	-0.335053605	1.124503454	-0.789449849
Q8BN58	-0.335491662	1.124607372	-0.78911571
Q8CG85	-0.335604542	1.124634123	-0.789029581
P28230	-0.337234875	1.125019277	-0.787784402
Q8BGD8	-0.336644163	1.124879989	-0.788235826
E9Q8Q6	-0.333232562	1.124069697	-0.790837136
Q9R0Q4	-0.330393027	1.123387693	-0.792994666
Q9WTU3	-0.330162768	1.123332087	-0.793169319
O89023	-0.331369925	1.123623102	-0.792253177
P59997	-0.331924536	1.123756388	-0.791831852
Q9QUR8	-0.33192349	1.123756137	-0.791832647
P56695	-0.353977832	1.128842251	-0.774864419
Q6P9S7;E5D8G1	-0.352791109	1.128579268	-0.775788159
Q571I4	-0.352830453	1.128588007	-0.775757554
Q8BGF3	-0.352845051	1.128591249	-0.775746197
Q99LN9	-0.348461192	1.127609376	-0.779148184
Q9DBU6	-0.350160938	1.127992054	-0.777831115
Q6P8X1;Q80ZJ7	-0.342172801	1.12617191	-0.783999109
Q8CG79	-0.342363948	1.126216107	-0.783852159
Q91Z96	-0.342439191	1.126233496	-0.783794305
Q8BWW4	-0.340641885	1.125816798	-0.785174913
Q8CFI2;A0A140T8I4	-0.341284786	1.125966171	-0.784681385
G3UW82	-0.346215484	1.127099948	-0.780884464
Q9CZL5	-0.346155867	1.127086365	-0.780930498
P24452	-0.344312987	1.126664967	-0.78235198
Q80TR8	-0.344514002	1.126711074	-0.782197071
O35130	-0.061373326	1.029273157	-0.967899831
O09110	-0.062375204	1.029727536	-0.967352332
Q9CWD3	-0.061996641	1.029555937	-0.967559295
P63166	-0.054662541	1.026210145	-0.971547603
Q8VE37	-0.055725675	1.026697652	-0.970971977
Q8CIQ7	-0.057281523	1.027409564	-0.970128041
Q62442	-0.058057909	1.027764134	-0.969706225
Q9Z0H7	-0.058456274	1.027945889	-0.969489615
Q9Z2D6	-0.058743587	1.028076902	-0.969333315
Q9DB24;Q8R0A5	-0.067226441	1.031917009	-0.964690568
Q8VC03	-0.067094797	1.031857829	-0.964763032
Q9D6L8	-0.070899659	1.033563014	-0.962663355
Q9D819	-0.070396866	1.033338308	-0.962941442
A2A8R0	-0.074410194	1.035126608	-0.960716414
P68372	-0.073141629	1.034562662	-0.961421032
Q64737	-0.073735501	1.034826821	-0.961091321
Q8BGD9	-0.079548986	1.037398655	-0.957849669
Q8BR92	-0.076457509	1.03603419	-0.959576681
P10923	-0.116056629	1.052964566	-0.936907937
Q8BGM4	-0.117063985	1.053379728	-0.936315743
Q9CPY6	-0.120554893	1.054812458	-0.934257564
Q9DBW0	-0.120612382	1.054835974	-0.934223592
P07607	-0.118810301	1.054097608	-0.935287307
Q921C1	-0.118079923	1.053797645	-0.935717722
Q8C5X1	-0.108896493	1.049991397	-0.941094904
Q9DBB5	-0.108377906	1.049774546	-0.941396639
P62748	-0.113570983	1.051936849	-0.938365866
Q61176	-0.111643345	1.051136609	-0.939493264
Q64727	-0.110920592	1.050835836	-0.939915245
Q61001	-0.088805126	1.041440796	-0.952635669
Q9CQE1	-0.091331311	1.04253272	-0.951201409
O55023	-0.091966809	1.042806648	-0.950839839
Q02357	-0.092485037	1.043029802	-0.950544765
Q8BK62	-0.101746295	1.046983467	-0.945237172
Q9QXK7	-0.103107316	1.04755901	-0.944451694
Q8BUH8	-0.102531202	1.047315557	-0.944784355
Q9CXE2	-0.102468227	1.04728893	-0.944820703
Q3UM45	-0.099209415	1.04590693	-0.946697515
Q80W14	-0.097228461	1.045062909	-0.947834449
Q61599	-0.163765917	1.071774641	-0.908008724
Q8BMJ2	-0.158672851	1.069850027	-0.911177176
Q9R0A5	-0.160115581	1.070397253	-0.910281672
O88569	-0.150748187	1.066815588	-0.916067402
D3YX43	-0.148977011	1.066130773	-0.917153763
E9PV86	-0.148207292	1.065832414	-0.917625122
Q8CE96	-0.147831641	1.065686638	-0.917854997
Q8C0Z1	-0.156646243	1.069078624	-0.912432381
Q9D8M3	-0.153243782	1.067776398	-0.914532616
P61965	-0.154236776	1.068157369	-0.913920593
Q80XJ3	-0.15477525	1.068363642	-0.913588392
P08032	-0.126680872	1.057304202	-0.93062333
P30412	-0.125931632	1.057000985	-0.931069353
P05627	-0.13031747	1.058769835	-0.928452365
Q61183	-0.128018273	1.05784438	-0.929826107
Q8K021	-0.12886261	1.058184706	-0.929322095
Q91VD9	-0.145546924	1.06479769	-0.919250766
Q9D783	-0.146491428	1.065165668	-0.918674241
Q9JJA7	-0.146337813	1.065105867	-0.918768054
P62751	-0.141835921	1.063345252	-0.921509331
Q64237	-0.143116798	1.063847766	-0.920730967
Q8R191	-0.143395277	1.063956851	-0.920561575
Q8K2B3	-0.137606297	1.061676947	-0.92407065
Q923D4	-0.136902635	1.061398069	-0.924495434
Q80UY2	-0.140131117	1.062674471	-0.922543354
P61588	-0.138993159	1.062225483	-0.923232324
Q8BP27	-0.139395038	1.06238416	-0.922989122
P16110	-0.133275742	1.059954629	-0.926678888
Q9D786	-0.132334838	1.059578521	-0.927243683
Q07076	-0.134347112	1.060382064	-0.926034952
Q8VDY4	-0.135941316	1.061016462	-0.925075146
Q80U63	-0.17467555	1.075829727	-0.901154177
Q9EQ61	-0.174326643	1.075701468	-0.901374825
O35988	-0.177298065	1.076790747	-0.899492681
Q62077	-0.176437223	1.076475881	-0.900038657
Q62523	-0.176789882	1.07660494	-0.899815059
O70251	-0.167739587	1.073262321	-0.905522734
O88696	-0.170793702	1.074397424	-0.903603722
Q8BUI3	-0.19043399	1.081523829	-0.89108984
Q9D0G0	-0.191099699	1.08176011	-0.890660411
Q8K136	-0.189051793	1.081032138	-0.891980345
P59808	-0.188225426	1.08073746	-0.892512034
Q6NZB0	-0.188451675	1.080818192	-0.892366517
Q8BHN1	-0.188354614	1.080783563	-0.892428949
Q8R5K4	-0.179881854	1.077732347	-0.897850493
Q8BUN5	-0.185152866	1.079637126	-0.894484261
Q91YR9;REV__Q3TVC7	-0.18510776	1.079620918	-0.894513158
Q91VJ2	-0.182732729	1.078765252	-0.896032523
Q9D0R2	-0.182539562	1.078695465	-0.896155903
Q6PD19	-0.195644775	1.083364036	-0.887719261
Q7TPR4	-0.196569193	1.083688277	-0.887119085
Q9CR88	-0.196968698	1.083828197	-0.886859499
Q9WVA3	-0.201097121	1.085266774	-0.884169654
Q9Z0F7	-0.201280442	1.085330344	-0.884049902
P26645	-0.198383607	1.084322738	-0.885939131
Q9JIK5	-0.198733973	1.084444956	-0.885710983
Q9CRC9	-0.204338108	1.08638674	-0.882048632
Q9D0R4	-0.203580445	1.086125659	-0.882545214
Q9QZX7	-0.203310988	1.086032699	-0.882721711
Q9D3D9	-0.210258877	1.088411394	-0.878152517
A2A4P0	-0.207937411	1.087620842	-0.87968343
D3Z2H9	-0.207138068	1.08734765	-0.880209582
P59900	-0.206815223	1.087237169	-0.880421945
Q02526	-0.21850603	1.091185465	-0.872679435
Q03958	-0.219427331	1.091492019	-0.872064688
Q5SYH2	-0.219179088	1.091409484	-0.872230396
Q61245	-0.214288821	1.089773652	-0.875484831
Q9D7V9	-0.215682431	1.090241753	-0.874559323
Q923Q2	-0.214871756	1.089969641	-0.875097886
Q9D3G5	-0.21521154	1.090083757	-0.874872217
Q03147	-0.221989133	1.092340896	-0.870351763
Q8K0S0	-0.224537212	1.09318006	-0.868642848
Q920P5	-0.224548058	1.093183621	-0.868635562
Q8R1B4	-0.226772897	1.093912093	-0.867139196
Q8VCI5	-0.22712269	1.094026267	-0.866903577
Q60592	-0.228619585	1.094513758	-0.865894173
Q9QYB5	-0.228604916	1.09450899	-0.865904073
Q3TCN2	-0.229544661	1.094814134	-0.865269473
Q9CQH7	-0.230104015	1.094995428	-0.864891413
Q8QZR4	0.295043989	0.819282941	-1.11432693
Q78JW9	0.293871152	0.820137229	-1.114008381
Q8R1U1	0.293405708	0.820475939	-1.113881647
Q9CXI3	0.291146013	0.822117801	-1.113263814
P10852	0.289154633	0.823561206	-1.112715839
P53026	0.28913147	0.823577976	-1.112709446
Q6TXD4	0.289933538	0.822997026	-1.112930564
P56394	0.289495538	0.823314342	-1.11280988
Q0VFX2	0.289672067	0.823186472	-1.112858538
P70271	0.299910707	0.815725845	-1.115636551
Q62210	0.30017218	0.815534175	-1.115706355
Q3UI43	0.298596322	0.816688473	-1.115284795
Q9QUR7;Q3ULQ2	0.299255001	0.81620625	-1.115461251
Q5M8N4	0.302139811	0.814090004	-1.116229815
P20033	0.305245674	0.811803837	-1.117049511
Q9ET01	0.305678992	0.811484238	-1.117163231
Q6GUQ1	0.272965418	0.835174334	-1.108139753
Q6P9J5	0.26823749	0.838525325	-1.106762815
O70591	0.269854368	0.837381391	-1.107235759
P19973	0.27079228	0.836716845	-1.107509125
P07141	0.27790131	0.831656447	-1.109557757
Q9D2G2	0.277481455	0.831956461	-1.109437916
P97304	0.282515601	0.828349698	-1.110865299
Q9CQZ0;Q921I0	0.286538017	0.825452816	-1.111990833
Q9JK23	0.286671871	0.825356187	-1.112028058
Q8K209	0.247059983	0.853312383	-1.100372365
Q9CR63	0.251676927	0.850119549	-1.101796477
O35143	0.250081361	0.851224901	-1.101306261
O55234	0.249613882	0.851548365	-1.101162246
P35505	0.258394016	0.845443643	-1.103837659
Q91YL3	0.257491548	0.846073993	-1.10356554
O70139	0.260558288	0.84392927	-1.104487558
Q6GQT9	0.260236506	0.844154666	-1.104391172
Q9R1T2	0.260215311	0.844169509	-1.10438482
P28658	0.262105208	0.842844539	-1.104949747
Q9DCL8	0.261382259	0.843351727	-1.104733986
Q9CX97	0.21626329	0.874173115	-1.090436405
O35387	0.21555089	0.874646746	-1.090197635
Q6P5F6	0.215775465	0.874497483	-1.090272948
P31648	0.206660903	0.880523426	-1.08718433
P30285;P11440;Q80YP0;Q3V3A1;Q14AX6;Q69ZA1	0.210552817	0.877958372	-1.088511189
Q64442	0.211367901	0.877419659	-1.088787561
Q8C4X2	0.225574535	0.867945671	-1.093520206
Q9WV32	0.222179694	0.870224138	-1.092403832
Q7TSQ8	0.223692346	0.869210044	-1.09290239
Q9EQ08	0.223632193	0.869250406	-1.092882599
Q8BWY3	0.239256235	0.858670069	-1.097926303
P70126	0.236200815	0.860754475	-1.09695529
Q9DAV6;I7HJI5	0.237119233	0.860128716	-1.097247949
Q99KP3	0.237072492	0.860160579	-1.097233071
Q80X41	0.237631729	0.859779236	-1.097410965
Q8BGS2	0.237919239	0.859583086	-1.097502325
P84075	0.228671481	0.865859146	-1.094530627
Q8JZX9	0.228326322	0.86609207	-1.094418392
Q8R081;REV__Q923Z3	0.229643043	0.865202996	-1.094846039
Q9QXP6	0.229289098	0.865442122	-1.09473122
P22935	0.234122732	0.862167876	-1.096290609
Q9Z2Q6	0.234377598	0.861994716	-1.096372314
Q91V64	0.235360101	0.8613267	-1.096686801
Q99KH8	0.234834486	0.861684168	-1.096518654
P04919	0.232213727	0.86346324	-1.095676968
Q01730	0.233014079	0.862920512	-1.095934591
Q8VCG3	0.233473633	0.862608652	-1.096082285
P07356;REV__Q8BND4	0.325996412	0.796321738	-1.12231815
Q9Z2I2	0.32467639	0.797317437	-1.121993827
Q8R3C0	0.332002572	0.791772549	-1.123775121
Q8CIF4	0.329667532	0.793544807	-1.123212339
Q9CZG9	0.330193358	0.793146119	-1.123339477
Q9QZE7	0.330495785	0.792916708	-1.123412493
Q91WT4	0.321401482	0.799781333	-1.121182816
Q3UTY6	0.32200755	0.79932604	-1.12133359
Q8QZV4	0.321939385	0.799377262	-1.121316648
A2A8L5	0.317441981	0.802748167	-1.120190148
E9Q2I4	0.319558068	0.801164242	-1.120722311
Q8K1I7	0.319481788	0.801221405	-1.120703193
P47199	0.314851813	0.804681807	-1.11953362
Q921I1	0.310617393	0.807830767	-1.11844816
Q3USH5	0.310151328	0.80817644	-1.118327768
Q8R0Y6	0.310345304	0.808032593	-1.118377897
Q8K4P8	0.335133804	0.789388688	-1.124522491
P09405	0.338024715	0.787180337	-1.125205052
Q8BTM8	0.338383055	0.786906104	-1.125289159
Q8BIX3	0.340200471	0.785513562	-1.125714033
Q91YT0	0.339403809	0.78612433	-1.125528139
Q9D6K5	0.339071729	0.786378762	-1.12545049
P62823	0.344093587	0.782521016	-1.126614603
Q14C51	0.34243223	0.783799657	-1.126231888
E9Q842	0.3461453	0.780938657	-1.127083957
Q8K440	0.348922653	0.778790863	-1.127713516
Q8BH66	0.368409564	0.763532415	-1.131941979
Q810U5	0.366802229	0.764803554	-1.131605783
Q8C142	0.366697038	0.764886664	-1.131583702
O35685	0.365507066	0.765826163	-1.131333228
Q9DC77	0.365232527	0.766042738	-1.131275265
Q9JJG0	0.353646277	0.775122623	-1.1287689
Q9WVJ9	0.353231996	0.775445117	-1.128677114
Q91Z31	0.361374566	0.769079171	-1.130453737
Q9QZD9	0.359348777	0.770668361	-1.130017138
Q9R1T4	0.432762732	0.710730986	-1.143493718
Q8R1H0	0.434889611	0.708920819	-1.14381043
Q63961	0.434089992	0.709601867	-1.143691859
Q61171	0.434542798	0.709216279	-1.143759077
Q9WU40	0.434394716	0.7093424	-1.143737116
Q9CQT1	0.430468	0.712679237	-1.143147237
Q64314	0.428206969	0.714594041	-1.14280101
Q9JIF9	0.426731707	0.715840818	-1.142572525
Q9JLZ3	0.39002648	0.74621442	-1.1362409
Q505B7	0.387942074	0.747902474	-1.135844548
Q91YR1	0.3865189	0.749052788	-1.135571689
Q8BYC6	0.374661482	0.758566495	-1.133227977
Q9DAT2	0.374923888	0.758357309	-1.133281197
P56812	0.375395437	0.757981243	-1.133376681
Q3URQ0	0.375883555	0.757591757	-1.133475312
Q69Z28	0.37568205	0.757752571	-1.133434621
Q8VEH2	0.384268065	0.750868375	-1.13513644
Q3TX08	0.381811066	0.752845087	-1.134656153
P49222	0.380296776	0.754060684	-1.13435746
Q8BG26	0.380934648	0.753548881	-1.134483529
Q61738	0.411595673	0.728515682	-1.140111355
Q8K2Y7	0.412596767	0.727683914	-1.14028068
Q68FE6	0.406065884	0.733093584	-1.139159468
Q6RHR9	0.406660825	0.7326024	-1.139263225
Q9CQ43	0.40642135	0.73280015	-1.1392215
Q3TMX7	0.40996302	0.729870212	-1.139833232
Q60992	0.408231395	0.731304179	-1.139535574
Q91ZJ9	0.394119256	0.742888514	-1.13700777
Q80UM3;Q9DBB4	0.395793807	0.741523368	-1.137317175
O54988	0.396520237	0.740930372	-1.137450608
O55201	0.396417052	0.741014632	-1.137431684
O35295	0.403280343	0.73538903	-1.138669373
Q3UKJ7	0.402465163	0.736059445	-1.138524609
Q61831	0.398041454	0.739687029	-1.137728483
Q80Y81	0.398024823	0.739700633	-1.137725456
P12804	0.400211513	0.737909733	-1.138121246
Q8CHW4	0.399607449	0.738404896	-1.138012345
Q9D0A3	-0.04460272	1.021555056	-0.976952336
Q5SS80	-0.039792647	1.019302352	-0.979509704
Q8BH93	-0.040298164	1.019539918	-0.979241754
Q9CX86	-0.031300774	1.015282918	-0.983982143
Q9JLM8;O88809	-0.030697536	1.014995329	-0.984297792
Q64012	-0.031923824	1.015579665	-0.983655841
P70670	-0.032393887	1.015803355	-0.983409468
Q6ZWN5	-0.032818165	1.016005114	-0.983186949
G3X8X0	-0.034921581	1.017003367	-0.982081786
P80560	-0.035222634	1.017145971	-0.981923337
Q7JJ13	-0.035270679	1.017168723	-0.981898044
P62874	-0.037665015	1.018300371	-0.980635356
Q8R138	-0.03724114	1.018100346	-0.980859206
P54227;P63042	-0.007422247	1.003690464	-0.996268218
Q9Z0E6;Q01514	-0.007230274	1.003595533	-0.996365259
A2RSX7	-0.004528815	1.002256716	-0.997727901
P26040	-0.005058976	1.00251989	-0.997460915
Q9Z0L8	-0.001580058	1.000789093	-0.999209035
P61027	0.003508375	0.998241197	-1.001749572
Q6ZQ88	0.001886832	0.999055249	-1.000942081
O55128	0.000605806	0.999696959	-1.000302766
Q6XUX1	0.000888759	0.999555324	-1.000444083
Q7TPW1	-0.027958674	1.013686161	-0.985727487
Q99JY9	-0.026625271	1.013046761	-0.98642149
P07091	-0.027305173	1.013372958	-0.986067784
P51859	-0.027139027	1.013293278	-0.986154251
Q4QQM5	-0.021936577	1.010787817	-0.98885124
P14131	-0.023232043	1.011413603	-0.98818156
Q8CBC4	-0.023275617	1.01143463	-0.988159013
Q571I9	-0.019583226	1.009647789	-0.990064563
Q91VH1	-0.019141394	1.00943329	-0.990291896
Q8CEC6	-0.017691807	1.008728522	-0.991036714
Q6P5B0	-0.016693517	1.00824225	-0.991548734
Q6PEE3	-0.017318792	1.008546912	-0.99122812
O55126	-0.017156372	1.008467802	-0.99131143
Q9D115	-0.016995171	1.008389266	-0.991394095
Q64010	-0.014761952	1.007299255	-0.992537302
Q62384	-0.013639366	1.006749919	-0.993110552
Q9WTM5	-0.013881657	1.006868563	-0.992986906
Q10470	-0.011872789	1.005883532	-0.994010743
Q8C7V8	-0.00982251	1.004875074	-0.995052564
Q3UHH8	-0.010252077	1.005086623	-0.994834547
Q9Z247	-0.010311365	1.00511581	-0.994804445
P28667	0.008844844	0.995548241	-1.004393085
Q8BKX1	0.011568126	0.994165753	-1.005733879
O09161	0.010895933	0.994507512	-1.005403445
Q00780	0.010656322	0.994629254	-1.005285576
Q64669	0.010677995	0.994618244	-1.005296239
P53808	0.013433142	0.993215758	-1.0066489
Q8BP01	0.015955135	0.991926966	-1.007882101
Q9DBG9	0.017607451	0.991080009	-1.008687461
Q5SUR0	0.030549665	0.984375125	-1.014924791
O88271	0.028730114	0.985325363	-1.014055477
Q8BU85	0.028350595	0.985523249	-1.013873843
Q80UW8	0.020178835	0.989757876	-1.009936712
Q8BJZ4	0.020374184	0.989657231	-1.010031415
P68373	0.02472033	0.987410648	-1.012130978
Q9D9V3	0.023624796	0.987978281	-1.011603077
Q62376	0.059836248	0.968738332	-1.02857458
Q5U452;Q99PW4	0.062123792	0.967489793	-1.029613585
P23506	0.061264122	0.967959462	-1.029223584
P48428	0.061596192	0.967778106	-1.029374298
P13020	0.0533952	0.972232685	-1.025627885
P35288	0.053420557	0.97221899	-1.025639547
P46061	0.052205844	0.972874512	-1.025080355
Q99MB1	0.052581589	0.972671858	-1.025253448
P42859	0.054765821	0.97149172	-1.026257542
P61458	0.054942075	0.971396334	-1.026338409
O55135	0.055993736	0.970826703	-1.026820439
Q8VE42	0.055444705	0.971124189	-1.026568894
Q8BWR2	0.046101144	0.976152117	-1.022253261
O08715	0.043600955	0.977486377	-1.021087332
P15116;P39038	0.044668916	0.97691702	-1.021585936
P62313	0.035464044	0.98179623	-1.017260274
Q9DA08	0.034730213	0.982182471	-1.016912684
Q6PGB6	0.03923301	0.979806118	-1.019039127
Q91YP0	0.038690129	0.980093431	-1.01878356
Q61488	0.040028341	0.979384798	-1.01941314
Q6ZPZ3	0.040507264	0.979130864	-1.019638128
P63143	0.040722318	0.979016782	-1.0197391
Q3UZA1	0.040895319	0.978924984	-1.019820302
Q8K4Q7	0.195334232	0.887920731	-1.083254963
F6W8I0	0.193341421	0.889211799	-1.082553219
P08103	0.192836296	0.889538556	-1.082374852
P70195	0.192724147	0.889611077	-1.082335223
Q06186	0.179757493	0.897929652	-1.077687145
Q9JI75	0.177752506	0.899204227	-1.076956733
A1A5B6	0.188008635	0.89265143	-1.080660065
Q62177;O08665	0.188569411	0.892290777	-1.080860188
Q91WK2	0.183278554	0.895683735	-1.078962288
G3X9B1	0.1841194	0.89514597	-1.07926537
P05202	0.183850368	0.89531809	-1.079168458
P70414	0.17085234	0.903566807	-1.074419147
Q6A051	0.171986716	0.902852144	-1.07483886
Q810D6	0.171471853	0.903176634	-1.074648487
Q64329	0.165568385	0.906882586	-1.072450971
Q80SY6	0.167618523	0.905598654	-1.073217177
Q8CES0	0.145257711	0.919427165	-1.064684876
B2RPU8;Q9D1L0	0.149433602	0.916873941	-1.066307543
Q9JLB0;REV__Q8C6L5;Q9WV34	0.148701903	0.917322285	-1.066024188
Q8CHH9	0.158978272	0.910987735	-1.069966007
Q9WUR9	0.158083228	0.911542693	-1.069625921
Q9CQQ7	0.151187927	0.91579731	-1.066985238
Q6P9R4	0.15314439	0.914593834	-1.067738224
P06795	0.152767077	0.914826159	-1.067593236
Q8VCN9	0.152482173	0.915001513	-1.067483685
Q91VC3;A0A0N4SVP8;E9PV04	0.156199393	0.912708717	-1.06890811
P10711	0.155452167	0.913170464	-1.068622631
Q9DBA6	0.155693159	0.91302159	-1.068714749
Q99L04	0.153967932	0.914086368	-1.0680543
A0A1B0GSF9	0.154787294	0.913580959	-1.068368253
P19182	0.154680115	0.9136471	-1.068327215
Q61074	0.154635655	0.913674534	-1.068310189
O09061	0.070885271	0.962671316	-1.033556586
O35083	0.071875172	0.962123269	-1.033998441
Q9CY64	0.088346183	0.952895719	-1.041241903
Q9D3D0	0.089101326	0.95246775	-1.041569076
Q9CZT4	0.084368131	0.95514312	-1.03951125
D3Z3N4	0.080639339	0.957238836	-1.037878175
E9PV48;Q64345	0.080845212	0.957123402	-1.037968614
Q7TSV4	0.080883374	0.957102001	-1.037985375
Q60963	0.082213437	0.956355418	-1.038568855
Q3U2V3	0.082052576	0.956445782	-1.038498359
Q8K0Z7	0.081923335	0.95651837	-1.038441705
Q3UYV9	0.122960843	0.93283365	-1.055794493
Q9CQ89	0.123289174	0.932638991	-1.055928166
Q7TS68	0.121245337	0.93384939	-1.055094728
Q9CY62	0.121904855	0.933459159	-1.055364015
Q8C1Z8	0.127558709	0.930100206	-1.057658916
E9Q6Y8	0.126134614	0.93094856	-1.057083174
Q14BA6	0.124865833	0.931703087	-1.05656892
D3YVV3	0.134074538	0.926198863	-1.060273401
Q9D5V5	0.133606167	0.926480383	-1.060086549
Q5SUQ9	0.131905082	0.927501427	-1.059406509
Q91YP2	0.13296201	0.926867286	-1.059829296
P45878	0.140987695	0.922024088	-1.063011783
P62073	0.142546664	0.921077582	-1.063624246
P24527	0.136970333	0.924454583	-1.061424916
Q3UR70	0.137248448	0.924286723	-1.06153517
P29595	0.138600727	0.92346969	-1.062070417
Q91YI4	0.139228701	0.923089798	-1.062318499
P21278	0.139758885	0.922768829	-1.062527714
Q6ZPE2	0.139796504	0.922746046	-1.062542551
D3YYU8	0.096983402	0.947974889	-1.044958291
Q9ESX5	0.096430154	0.948291782	-1.044721935
P97823	0.094545016	0.94936982	-1.043914836
Q8BGU2	0.095729675	0.948692673	-1.044422348
Q4LFA9	0.102097928	0.945034371	-1.047132299
Q9QXV0	0.099912368	0.946293352	-1.046205721
Q8CI71	0.098533081	0.947086019	-1.045619101
Q9D7A8	0.098116374	0.947325215	-1.045441588
O70309	0.106175494	0.942675816	-1.04885131
P50544	0.110535339	0.940140013	-1.050675352
Q8VEJ1	0.114180128	0.938009013	-1.052189142
Q9CR86	0.114996288	0.937530444	-1.052526732
Q91VJ5	0.118186009	0.93565523	-1.053841239
Q9D281	0.118210455	0.935640829	-1.053851284
P70425	0.119105496	0.935113231	-1.054218728
Q8BTI9	0.118697379	0.935353879	-1.054051258
