# Supplementary material for: Investigation of the Hydrogen Sulfide Signaling Pathway in Schwann Cells during Peripheral Nerve Degeneration: Multi-Omics Approaches
Source: Antioxidants (Basel). 2022 Aug 19;11(8):1606. doi: 10.3390/antiox11081606 (PMC9405209; doi:10.3390/antiox11081606)
Supplement: Supplementary file 1 [file antioxidants-11-01606-s001.zip › Proteomics clustering-Cluster 5.txt]

GeneID	Control	X1DAY	X1DAY.NEM
Q60865	-0.885421269	1.084599941	-0.199178672
Q6ZQE4	-0.885321022	1.084653514	-0.199332492
Q8K2G4	-0.884581314	1.085047939	-0.200466625
Q9DCM7	-0.884928098	1.084863221	-0.199935123
Q3UZ39	-0.887759626	1.083342192	-0.195582566
Q9D4V0	-0.887921557	1.083254515	-0.195332957
P51150	-0.886153737	1.08420764	-0.198053902
Q925J9	-0.886967323	1.083770102	-0.196802779
B2RXR6	-0.886645698	1.083943294	-0.197297596
P47754	-0.88677635	1.083872975	-0.197096624
Q5SXY1;REV__Q61120	-0.897705397	1.07781515	-0.180109753
Q6NVG1	-0.897656987	1.077842762	-0.180185775
O70451	-0.89752525	1.077917868	-0.180392618
Q9D824	-0.897409758	1.077983668	-0.18057391
Q4U2R1	-0.898738481	1.077224206	-0.178485725
O70583;Q9QUS6	-0.898328512	1.077459102	-0.179130589
Q7TSG2	-0.897969952	1.077664126	-0.179694174
O08638	-0.90098551	1.07592767	-0.174942161
Q6ZPT1;Q80TF4	-0.901126551	1.075845775	-0.174719225
Q3UMU9	-0.901467503	1.07564755	-0.174180048
Q9D8Z2	-0.901642649	1.075545584	-0.173902934
P97372	-0.901598208	1.075571465	-0.173973257
Q9Z0M6	-0.90155723	1.075595325	-0.174038094
Q7TQH0	-0.899645368	1.076702783	-0.177057415
Q3UJB0	-0.900429188	1.076250102	-0.175820914
Q8BFR4	-0.900423989	1.076253111	-0.175829122
Q504M2	-0.89657745	1.078456685	-0.181879235
Q9D270	-0.896030719	1.078766272	-0.182735553
O54865	-0.896392851	1.078561314	-0.182168463
P55302	-0.89634098	1.078590695	-0.182249715
Q8CD54	-0.896286248	1.078621689	-0.182335442
Q6P1F6;Q6ZWR4;Q8BG02	-0.896230484	1.078653258	-0.182422775
Q99K41	-0.896198892	1.078671139	-0.182472247
Q8BH01	-0.894249227	1.079768858	-0.185519631
Q9Z2Y8	-0.894647062	1.079545783	-0.184898721
P26618	-0.89492341	1.079390552	-0.184467141
Q9D0I6	-0.89484553	1.079434322	-0.184588792
B9EJR8	-0.892341957	1.080831812	-0.188489855
P21845	-0.893501027	1.080187121	-0.186686094
Q9QYA2	-0.892969418	1.0804833	-0.187513882
Q9CYZ6	-0.889926642	1.082162606	-0.192235963
Q60598	-0.891316759	1.081398756	-0.190081998
Q99J39	-0.89075819	1.081706358	-0.190948167
P15208	-0.923145978	1.062281843	-0.139135866
Q91W59;Q8BWL5	-0.922673271	1.062589932	-0.13991666
B9EJ80	-0.923783257	1.06186527	-0.138082013
O55101	-0.923536597	1.062026672	-0.138490075
P46638;P62492	-0.924464037	1.061418703	-0.136954666
Q3TNH5	-0.924157659	1.061619876	-0.137462217
P60840	-0.927123009	1.059658975	-0.132535966
P63168;Q80ZS7	-0.927161653	1.059633217	-0.132471564
O35343	-0.927527401	1.059389162	-0.131861761
Q921H8;Q8VCH0	-0.927420337	1.059460652	-0.132040315
Q8CIV8	-0.925293439	1.060872462	-0.135579023
P47802	-0.925836905	1.060513231	-0.134676326
Q64213	-0.926357746	1.060167981	-0.133810235
P62878	-0.931137332	1.056954709	-0.125817377
P23927	-0.93125275	1.0568761	-0.12562335
Q9DBU3	-0.931306371	1.056839563	-0.125533192
A0A0A6YY83	-0.929565036	1.058020778	-0.128455742
Q9DCZ4	-0.930315969	1.057512733	-0.127196764
Q8K3G9	-0.929941845	1.057766101	-0.127824255
Q9DB30	-0.929990667	1.057733066	-0.127742399
A2A690	-0.932288069	1.056168794	-0.123880725
P21981	-0.932217015	1.056217462	-0.124000447
Q6PD24	-0.933168804	1.055564017	-0.122395213
Q99NB1	-0.932715859	1.055875397	-0.123159538
P22777	-0.934346484	1.054750884	-0.1204044
Q6ZPY7	-0.934539625	1.054617041	-0.120077415
Q8CJ96	-0.934715174	1.054495269	-0.119780096
Q3UDR8	-0.935609621	1.053873047	-0.118263425
Q9JHU2	-0.935695362	1.053813245	-0.118117884
P49718	-0.935171838	1.054177962	-0.119006124
Q9CWK8	-0.93491464	1.054356768	-0.119442127
P18828	-0.919322517	1.064751816	-0.145429299
P97868	-0.919449866	1.06467035	-0.145220485
Q9WVM3	-0.920096109	1.0642561	-0.144159991
Q8BU33	-0.919605072	1.064570991	-0.144965919
P97807	-0.919850865	1.064413471	-0.144562606
Q99K48	-0.919807885	1.064441031	-0.144633146
Q80WG5	-0.920520319	1.063983404	-0.143463085
Q8BJ03	-0.920740111	1.063841874	-0.143101763
Q61809	-0.921665186	1.063244382	-0.141579196
Q9Z0H8	-0.921909233	1.063086267	-0.141177034
Q61595	-0.91564862	1.067078529	-0.151429909
Q8BKI2	-0.915562106	1.067132776	-0.15157067
P19426	-0.915332245	1.067276786	-0.151944541
P50608	-0.915427088	1.067217387	-0.151790299
Q80UM7	-0.914193826	1.06798744	-0.153793614
Q3UR97	-0.914700493	1.067671683	-0.15297119
Q921V5	-0.914508497	1.067791436	-0.153282939
Q6PCP5	-0.917580914	1.065860428	-0.148279514
P57787	-0.918054179	1.065560183	-0.147506005
Q9D6J5	-0.918052539	1.065561224	-0.147508685
P41539	-0.918425258	1.065324239	-0.146898981
Q6A039	-0.9184117	1.065332868	-0.146921169
O08989	-0.916727759	1.066399785	-0.149672026
Q78IK2	-0.916938757	1.06626662	-0.149327863
Q924C6	-0.916092055	1.066800091	-0.150708037
P62334	-0.916368067	1.06662645	-0.150258383
Q9D7X3	-0.916514687	1.066534107	-0.15001942
Q3TZX8	-0.911246314	1.069807671	-0.158561357
Q99LE6;REV__Q9DAC9	-0.911399684	1.069713654	-0.15831397
A2AGH6	-0.910787796	1.070088288	-0.159300492
Q2PFD7	-0.910876541	1.070034028	-0.159157487
P62320	-0.910418717	1.070313675	-0.159894957
Q9D2V8	-0.910589212	1.070209612	-0.1596204
Q9R1B9	-0.910607535	1.070198423	-0.159590888
Q9CZT6	-0.91234722	1.069131123	-0.156783903
Q9WVL3	-0.911805789	1.069464344	-0.157658556
Q99KK2	-0.913370389	1.068498809	-0.15512842
Q9CWF6	-0.913485313	1.068427573	-0.154942261
Q9R1E0	-0.913098652	1.068667075	-0.155568424
O35710	-0.912879741	1.068802454	-0.155922713
Q8R1F0	-0.912977212	1.068742196	-0.155764984
Q9CWX9	-0.902254524	1.075188621	-0.172934097
O70281	-0.90288795	1.07481787	-0.17192992
Q9JKF7	-0.902765399	1.074889697	-0.172124298
Q00896;P07758	-0.903221869	1.074621923	-0.171400054
Q9CYN9	-0.903014296	1.074743769	-0.171729474
P35831	-0.904443628	1.073902032	-0.169458404
P97412	-0.904763107	1.073713019	-0.168949912
Q8R4H2	-0.904667511	1.07376961	-0.169102099
A2ARP1	-0.903572377	1.07441587	-0.170843493
Q99N93	-0.904132895	1.074085564	-0.169952669
Q9D773	-0.904107325	1.074100653	-0.169993328
Q8BLA8	-0.904112679	1.074097494	-0.169984814
Q91VB4	-0.904111113	1.074098418	-0.169987306
P11352	-0.907853062	1.071868368	-0.164015306
P15379	-0.908012886	1.071772134	-0.163759249
Q3V132	-0.909230291	1.071036437	-0.161806145
Q7TQK5	-0.908610036	1.071411858	-0.162801823
Q99N91	-0.908889495	1.071242862	-0.162353368
Q05920	-0.905345215	1.073367808	-0.168022593
Q8BXA7	-0.905806377	1.073093567	-0.167287189
Q6PD28	-0.907100472	1.072320428	-0.165219956
Q9ERL7	-0.906458948	1.072704358	-0.16624541
Q64520	-0.985975988	1.013457507	-0.027481519
P24638	-0.986061272	1.013378958	-0.027317686
Q9JI13	-0.98605891	1.013381134	-0.027322223
C0HKD9;C0HKD8	-0.990005969	1.009703029	-0.01969706
Q8CJF7	-0.989701445	1.009989818	-0.020288373
Q0KL02	-0.988049416	1.011536798	-0.023487382
Q3TPR7	-0.987860949	1.011712338	-0.023851389
B2RRD7	-0.988435035	1.011177028	-0.022741993
Q6DFW4	-0.988673504	1.010954141	-0.022280637
Q9R049	-0.988821717	1.010815457	-0.02199374
Q6IMP4	-0.992045962	1.007768628	-0.015722666
Q9Z0X4	-0.992425211	1.007406454	-0.014981243
Q99LL5	-0.990741665	1.009008073	-0.018266407
Q8VE18	-0.991597836	1.00819554	-0.016597704
Q9DCT2	-0.991237569	1.008537941	-0.017300372
Q9CXA2	-0.9939903	1.005903258	-0.011912958
Q8VDI9	-0.993105092	1.00675516	-0.013650068
Q9DC61	-0.993184456	1.006678963	-0.013494507
Q8BQ89	-0.994950536	1.004974109	-0.010023573
P29758	-0.995733756	1.004212329	-0.008478573
Q9CQV6	-0.995851117	1.004097876	-0.008246759
Q99LI2	-1.005082895	0.994838391	0.010244504
Q8BT14	-1.005841097	0.994054712	0.011786385
Q6VN19	-1.005572001	0.994333265	0.011238735
P62192	-1.00546536	0.994443527	0.011021833
Q8BRF7	-1.005375037	0.994536861	0.010838176
Q8CFX1	-1.007399921	0.992432043	0.014967878
Q6NXJ0	-1.007385088	0.992447557	0.014937531
Q8VDZ4	-1.007371944	0.992461303	0.014910641
Q8BXK8	-1.007091747	0.992754071	0.014337676
Q8CI78	-1.007144838	0.992698636	0.014446203
Q8K1B8	-1.006476119	0.993395551	0.013080567
O88952;O88951;Q8JZS0	-1.006269705	0.993610092	0.012659613
Q80ZK9	-1.00615797	0.993726113	0.012431857
Q6A037	-1.00833371	0.991452548	0.016881161
Q9D6Y9	-1.0080258	0.991776152	0.016249648
Q9DCD2	-1.008125581	0.991671352	0.016454229
A0A140LIF8	-1.009026771	0.990721912	0.018304859
Q9DBN5	-1.00876799	0.990995089	0.017772901
Q80X50	-1.009701704	0.990007375	0.019694329
Q91YE7	-1.009427061	0.990298494	0.019128566
Q9JHU9	-1.009522673	0.990197201	0.019325472
Q6NZR5	-1.01032845	0.989341174	0.020987276
Q91YL2	-1.010436382	0.989226186	0.021210196
Q8BGU5;D3YUJ3	-1.010575668	0.989077679	0.021497989
Q91ZW3;Q6PGB8	-1.010768639	0.988871722	0.021896917
P63082	-1.01206926	0.987477108	0.024592152
Q8BH97	-1.011764592	0.987804808	0.023959784
Q8BW10	-1.011142243	0.988472274	0.022669968
P21843	-1.011439554	0.988153733	0.023285821
Q8VHG2	-1.011505724	0.988082757	0.023422967
Q60751;Q9WTL4	-0.999384687	1.000614179	-0.001229493
Q8VE91	-0.99833759	1.00165416	-0.00331657
Q61112	-0.998437064	1.001555642	-0.003118577
Q9Z0Y1	-0.998391908	1.001600372	-0.003208464
Q6S5J6	-0.998777276	1.001218255	-0.002440979
G5E870	-0.998850076	1.001145971	-0.002295895
Q3UDF0	-0.998912249	1.001084213	-0.002171964
Q6A026	-0.997831764	1.002154223	-0.004322459
Q8K3K8	-0.998026926	1.001961464	-0.003934538
F8VPU2	-0.996756058	1.003212675	-0.006456617
P55258	-0.997025068	1.002948616	-0.005923548
Q6PHS9	-1.003360848	0.99660492	0.006755928
Q9CQP2	-1.003052884	0.996918897	0.006133987
Q3U182	-1.003184312	0.996784974	0.006399338
Q9D1R2	-1.0031215	0.996848992	0.006272508
E9PYF7	-1.003750332	0.996206991	0.00754334
Q8K273	-1.004195754	0.995750757	0.008444997
Q9WTR1	-1.004359455	0.995582771	0.008776684
Q3TKT4	-1.000047103	0.99995289	9.42E-05
Q69Z89	-1.000511201	0.999488014	0.001023186
Q8BH60	-1.000511946	0.999487266	0.00102468
P97450	-1.000930821	0.999066572	0.00186425
Q9EQK5	-1.001282768	0.998712276	0.002570492
F7BWT7	-1.001672446	0.998319121	0.003353325
O08582	-1.002075605	0.997911389	0.004164216
Q9CR25	-0.957166409	1.037934927	-0.080768518
Q9EQ20	-0.957221877	1.037891466	-0.08066959
P56399	-0.956822441	1.038204139	-0.081381698
Q9WTR5	-0.956967003	1.038091057	-0.081124053
Q91W53	-0.955138614	1.039514741	-0.084376128
Q8CIZ8	-0.955208998	1.039460199	-0.084251201
Q9CYI4	-0.955231251	1.03944295	-0.084211699
A2AUC9	-0.955800543	1.039000968	-0.083200425
S4R1M9	-0.955639246	1.039126334	-0.083487088
Q8R3Q0	-0.95262604	1.041448155	-0.088822115
P21619	-0.952278861	1.041713235	-0.089434374
Q9CQZ6	-0.952148904	1.041812332	-0.089663428
P19157;P46425;F6RWR5	-0.9520765	1.041867512	-0.089791012
Q9DCP9	-0.952076353	1.041867624	-0.089791271
P97819	-0.953763093	1.040576475	-0.086813382
Q91VW3	-0.953958216	1.040426348	-0.086468132
Q9QZH6	-0.953929681	1.040448312	-0.086518632
Q5SSW2	-0.952939122	1.041208679	-0.088269557
O54901	-0.953171541	1.041030639	-0.087859098
Q8BXG3	-0.953242043	1.040976588	-0.087734546
Q8BRH3	-0.949391398	1.043898633	-0.094507236
O08808	-0.949089793	1.044124938	-0.095035146
Q9DCB8	-0.949179066	1.044057992	-0.094878926
Q9EQU5	-0.951254667	1.042492325	-0.091237659
A2APB8	-0.950161721	1.043318952	-0.093157231
Q9D6J6	-0.950176574	1.043307751	-0.093131177
P50427	-0.950798907	1.042837626	-0.092038719
Q920B9	-0.950537949	1.043034952	-0.092497003
Q8CBG9	-0.947779099	1.045104119	-0.09732502
Q148W0	-0.947382572	1.045398988	-0.098016416
Q80YT7	-0.947085923	1.045619173	-0.09853325
Q91W86	-0.946144058	1.046315927	-0.100171869
P80316	-0.946272636	1.046221018	-0.099948382
Q9JHH9	-0.946260111	1.046230266	-0.099970156
Q91VR8	-0.945052635	1.047118901	-0.102066266
Q9D3U0	-0.945251645	1.046972839	-0.101721194
Q80X80	-0.936916041	1.052958875	-0.116042834
Q8BPB5	-0.938396599	1.051915098	-0.113518498
Q3UYK3	-0.938155359	1.052085734	-0.113930375
Q9QYY0	-0.938225733	1.052035979	-0.113810246
Q8C3X2	-0.939000172	1.051487206	-0.112487034
Q69Z23	-0.939220135	1.051330923	-0.112110788
Q99M07	-0.939417395	1.051190614	-0.111773219
Q8K337	-0.940217512	1.050619973	-0.110402461
O70305	-0.940805869	1.050198793	-0.109392925
Q8CB77	-0.940989517	1.050067055	-0.109077538
Q9Z0H3	-0.94099787	1.05006106	-0.109063189
Q5UAK0	-0.942404401	1.049047732	-0.106643331
E9PZM4;P40201	-0.942177061	1.049212038	-0.107034977
Q6P5D8	-0.9421586	1.049225371	-0.10706677
Q9Z148	-0.944198358	1.047744118	-0.103545761
P28741;E9PX57;P33174	-0.94325999	1.048427571	-0.105167581
Q9D2Q3	-0.943162228	1.048498577	-0.105336348
Q9EPU4	-0.9431839	1.048482839	-0.105298938
P61759	-0.969482924	1.027951499	-0.058468575
Q9Z210	-0.969138769	1.028239813	-0.059101044
Q9Z2B5	-0.96977409	1.027707144	-0.057933054
Q6P5H2	-0.969887278	1.027612047	-0.057724769
Q8R4N0	-0.969974994	1.027538308	-0.057563314
P61294	-0.970253786	1.027303703	-0.057049916
Q8R4E4	-0.970483672	1.027109976	-0.056626304
Q8R5A3	-0.96675494	1.030221748	-0.063466808
O08915	-0.965998966	1.030844806	-0.06484584
O70131	-0.966373646	1.030536329	-0.064162683
Q65Z40	-0.968210268	1.029014904	-0.060804635
Q3TXU5	-0.96809144	1.02911381	-0.06102237
O35231	-0.967995689	1.029193461	-0.061197772
Q9D1G3	-0.96798493	1.029202408	-0.061217478
B9EKI3	-0.967426603	1.029665979	-0.062239376
Q62312	-0.967460677	1.029637729	-0.062177052
Q8VEH6	-0.967693886	1.029444237	-0.061750351
Q9CXG3	-0.967831745	1.029329738	-0.061497992
Q80U78	-0.965334454	1.03139033	-0.066055876
Q9CPQ3	-0.965207245	1.031494532	-0.066287286
Q3UJP5	-0.965002198	1.03166234	-0.066660142
Q60634	-0.964813973	1.031816213	-0.067002241
P35292	-0.963506705	1.032880491	-0.069373786
P56480	-0.963397546	1.032969012	-0.069571465
E9Q512	-0.964496692	1.032075227	-0.067578535
P14685	-0.964035743	1.032450714	-0.068414971
P13439	-0.959958135	1.035731066	-0.075772931
Q6ZWR6	-0.95985752	1.035811082	-0.075953562
Q3USB7	-0.960285555	1.035470374	-0.075184819
Q9Z2X8	-0.960499644	1.035299663	-0.074800019
P21661	-0.961603661	1.034416136	-0.072812475
Q5SRY7;Q3ULA2	-0.961750533	1.034298192	-0.07254766
Q8CI95	-0.962396897	1.033777999	-0.071381102
Q9D6W8	-0.962375992	1.033794852	-0.071418859
P31001	-0.962999992	1.033290954	-0.070290962
Q62388	-0.962688157	1.033542987	-0.070854829
Q99J62	-0.976738722	1.021741747	-0.045003025
A6H8H2	-0.97642633	1.02201436	-0.04558803
Q9Z0P5	-0.97633934	1.022090188	-0.045750848
Q9QUN9	-0.975693271	1.02265219	-0.046958919
Q9QXV1	-0.975951601	1.02242772	-0.046476119
Q99KI3	-0.974982545	1.023268071	-0.048285526
A2ANY6	-0.97525529	1.023032015	-0.047776726
Q9DAS9	-0.975207389	1.023073499	-0.04786611
Q6DIC0	-0.972278018	1.025589277	-0.053311259
Q8R242	-0.972332242	1.025543084	-0.053210842
O35954	-0.971455793	1.026288006	-0.054832213
Q91WM2	-0.971499561	1.026250892	-0.054751331
Q9WUK2	-0.971819377	1.025979428	-0.054160051
P28660;Q8K1X4	-0.971703085	1.026078195	-0.05437511
Q91Z92	-0.971711597	1.026070968	-0.054359372
P97314	-0.974292986	1.023863255	-0.049570269
Q8BWR4	-0.973947665	1.024160448	-0.050212783
P97379	-0.973320577	1.024698661	-0.051378084
Q60649	-0.972837834	1.025111697	-0.052273862
P60882	-0.981861075	1.017201971	-0.035340896
Q8VI56	-0.982377929	1.016736491	-0.034358562
Q8BYW9	-0.983987726	1.015277836	-0.03129011
Q99JR8	-0.984285	1.015006994	-0.030721995
Q148V7	-0.982939539	1.016229141	-0.033289602
P61208	-0.983632888	1.015600518	-0.031967631
Q8BX37	-0.98325792	1.015940792	-0.032682872
Q921R8;Q8BJA2	-0.983363346	1.015845195	-0.032481849
Q9QXY9	-0.983321023	1.015883579	-0.032562556
P97470	-0.98083518	1.018121828	-0.037286648
Q8R502	-0.979820558	1.019026292	-0.039205734
P07903	-0.980137398	1.018744413	-0.038607015
P37804	-0.980091464	1.01878531	-0.038693846
Q9CQJ8	-0.978486092	1.020207947	-0.041721855
Q9CX00	-0.978533402	1.020166207	-0.041632806
Q9JHJ0	-0.978225676	1.020437498	-0.042211822
Q9QY01	-0.97837455	1.020306311	-0.041931761
Q6P6L0	-0.977367181	1.021191849	-0.043824667
Q9CPR7	-0.977938533	1.020690217	-0.042751684
E9Q368	-1.012535005	0.986974948	0.025560056
Q8C7V3	-1.012903152	0.98657698	0.026326172
S4R1W5	-1.013880232	0.985516292	0.02836394
Q60931	-1.013524703	0.985902996	0.027621707
Q9WV03	-1.01322281	0.986230684	0.026992126
O35250	-1.0147322	0.984586093	0.030146108
Q9ESU6	-1.014642677	0.984684071	0.029958605
P61979	-1.014405248	0.984943657	0.02946159
Q8R3Q6	-1.014280943	0.985079407	0.029201536
B9EHT4	-1.015782769	0.983432155	0.032350615
E9Q394	-1.015823052	0.983387756	0.032435297
Q8CIM8	-1.015359067	0.983898469	0.031460598
Q9QZ23	-1.015379425	0.983876091	0.031503335
Q8R3K3	-1.015271418	0.983994776	0.031276643
Q8VC70	-1.01518183	0.98409316	0.03108867
Q8R3B7	-1.01885908	0.980008578	0.038850503
Q9D850	-1.019238774	0.979581344	0.03965743
Q8VE73	-1.019682542	0.979080693	0.04060185
Q3U7U3	-1.020298937	0.978382913	0.041916024
Q9D666	-1.020188911	0.978507669	0.041681242
Q8C3R1	-1.017033102	0.982048759	0.034984342
Q91VN6	-1.016644584	0.9824798	0.034164784
Q9R045	-1.018304304	0.980630951	0.037673353
Q9Z0P4	-1.018158983	0.980793614	0.037365369
P42128	-1.017477841	0.981554034	0.035923807
Q9DCS9	-1.01778783	0.981208376	0.036579454
Q9WU42	-1.025374172	0.972530381	0.052843791
P21812;P11034	-1.024325417	0.973755689	0.050569729
Q9D554	-1.023823765	0.974338821	0.049484944
Q91V41	-1.021712521	0.97677218	0.044940341
Q9CQ28	-1.021048355	0.977530807	0.043517548
Q9WVR4	-1.021029564	0.977552223	0.043477341
Q8VI59;Q9QYC1	-1.020847325	0.977759788	0.043087537
Q9QZA0	-1.02089261	0.977708233	0.043184377
P00405	-1.023392038	0.974839142	0.048552895
Q91WB4	-1.023318574	0.974924138	0.048394436
E9Q1Z2	-1.022677782	0.975663794	0.047013989
Q61481	-1.022522409	0.975842674	0.046679735
B2RXC2;Q8R071;Q7TS72	-1.022440241	0.975937201	0.046503039
P03911	-1.022412447	0.975969164	0.046443283
O09044	-1.026439357	0.971277191	0.055162166
P97376	-1.026504786	0.971199926	0.05530486
Q99MN9	-1.026512607	0.971190688	0.055321919
Q78HU7	-1.027338231	0.970212782	0.057125449
Q8C0J6	-1.027184707	0.970395028	0.056789679
Q9CQW0	-1.027257594	0.970308528	0.056949066
Q61102	-1.028107721	0.969296528	0.058811193
Q8BTI8	-1.02775684	0.969714913	0.058041926
P02469	-1.029132295	0.968069224	0.061063071
Q60928	-1.028951708	0.968286153	0.060665555
Q9CZ83	-1.028908571	0.968337931	0.06057064
O55142	-1.028661862	0.968633782	0.060028081
P14733	-1.028383701	0.968966764	0.059416937
Q925G2	-1.028442993	0.968895839	0.059547154
O55100	-1.032232555	0.964303698	0.067928857
B1AZI6;E9Q5E2	-1.032347049	0.964163121	0.068183928
P14142	-1.03230014	0.96422073	0.06807941
P26339	-1.031149437	0.965628192	0.065521245
Q8R1R4	-1.031043762	0.965756899	0.065286863
Q9ES56	-1.031441528	0.965271964	0.066169564
P52875	-1.031700138	0.96495598	0.066744158
Q8BPM2	-1.031677979	0.964983076	0.066694903
E9PVB5	-1.030593792	0.96630391	0.064289882
Q9JJY4	-1.030731737	0.966136392	0.064595345
P61924	-1.030329434	0.966624508	0.063704926
P55937	-1.03038362	0.96655884	0.06382478
P57080	-1.030383409	0.966559096	0.063824313
P11031	-1.030269821	0.966696724	0.063573097
Q60949	-1.030209627	0.966769616	0.063440011
Q9D0R9	-1.029929877	0.967107988	0.062821889
Q9D787	-1.029744968	0.967331295	0.062413674
P35762	-1.029835405	0.967222113	0.062613292
Q8CBY3	-1.029803109	0.96726111	0.062541998
Q8R323	-1.029799391	0.967265599	0.062533792
Q3UFS4	-1.02938954	0.967759756	0.061629783
O88325	-1.029644254	0.967452807	0.062191447
Q9CR95	-1.029556701	0.967558373	0.061998328
A0A1L1SQU7	-1.033380026	0.962889847	0.070490178
Q9JLQ0	-1.033542664	0.962688557	0.070854107
E9Q5F9	-1.034162143	0.961919802	0.072242341
Q8BTW3	-1.034363993	0.961668608	0.072695385
Q91ZA3	-1.034326871	0.96171483	0.072612041
E9Q166	-1.035053446	0.96080798	0.074245467
Q9JLN9	-1.035010988	0.960861097	0.074149891
Q9JIZ9	-1.035815299	0.959852216	0.075963083
Q9WV27	-1.035470179	0.960285799	0.07518438
P55288	-1.037306303	0.957967077	0.079339226
Q8K2V6	-1.036766509	0.958651814	0.078114695
P30987	-1.036297487	0.959244696	0.077052791
Q9R0L6	-1.036316711	0.959220433	0.077096278
Q6PDM2	-1.042070934	0.951809336	0.090261599
Q80TN7	-1.04207062	0.951809748	0.090260872
Q5SFM8	-1.041761841	0.952215129	0.089546712
Q61749	-1.041537296	0.952509364	0.089027932
O54804	-1.040461562	0.953912466	0.086549096
Q9QXD8	-1.04044511	0.953933841	0.086511269
Q921G8	-1.041058631	0.953135019	0.087923612
Q8CCM6	-1.041249017	0.952886423	0.088362594
Q9ERE7	-1.041256201	0.952877037	0.088379163
P06801	-1.039521977	0.955129275	0.084392702
Q99J56	-1.039675606	0.954930869	0.084744736
A2AJL3	-1.039845368	0.954711378	0.08513399
Q7TQK1	-1.040054705	0.954440357	0.085614347
Q9D735	-1.04005894	0.954434869	0.085624072
P49290	-1.038815451	0.95603897	0.082776482
Q3URE1	-1.038549677	0.956380005	0.082169673
Q9EQJ9	-1.038530626	0.956404427	0.082126199
P35951	-1.038161044	0.956877547	0.081283497
Q9DAZ9	-1.038305394	0.956692903	0.08161249
Q505F5	-1.037894222	0.95721836	0.080675862
Q922J3	-1.037868638	0.957251006	0.080617631
O54931	-1.038066935	0.956997826	0.081069109
Q62120	-1.038037096	0.957035945	0.081001151
Q6ZQA6	-1.038010007	0.957070545	0.080939462
P09103	-1.045639009	0.947059174	0.098579835
Q91W50	-1.045810932	0.946827181	0.098983751
P48678	-1.046870832	0.945390504	0.101480328
P52623	-1.046378468	0.946059281	0.100319187
Q9D2Y4	-1.042941435	0.950661668	0.092279767
Q8QZY9	-1.04326168	0.950237653	0.093024027
Q9D0E1	-1.043316548	0.950164908	0.09315164
O88379	-1.04348652	0.949939374	0.093547146
Q9WV85	-1.04358141	0.949813345	0.093768065
Q8BTE0	-1.044874211	0.948087681	0.096786529
Q9JJH7	-1.044724747	0.948288016	0.096436731
Q9Z1Q2	-1.044379003	0.948750604	0.095628399
O54967	-1.044099542	0.949123664	0.094975878
Q9D967	-1.044176946	0.949020411	0.095156535
Q3U829	-1.052883539	0.937023296	0.115860243
Q8K0Q5	-1.052932618	0.93695343	0.115979188
Q9JM96	-1.05260664	0.937416986	0.115189654
Q8BVR6	-1.052514892	0.937547248	0.114967644
Q925I1	-1.05254546	0.937503859	0.1150416
Q5SUE8	-1.052388184	0.937726998	0.114661186
Q8BGX3	-1.052278849	0.937881963	0.114396886
Q9CQA9	-1.050543936	0.940323866	0.11022007
B2RSH2	-1.050713924	0.940086015	0.11062791
P47757	-1.050855096	0.939888252	0.110966844
Q8BG05	-1.051623232	0.938808509	0.112814722
Q9R0X0	-1.05169521	0.93870701	0.1129882
B1AZA5	-1.051279401	0.939292594	0.111986807
O89104	-1.051173999	0.939440739	0.111733261
P43276	-1.049904504	0.94121587	0.108688634
Q8C5N3;A2AK44;A2AK42	-1.049926759	0.941184896	0.108741862
Q8CD15	-1.049574931	0.941673959	0.107900972
Q91WP6;Q5I2A0	-1.049744123	0.941438931	0.108305192
P47934	-1.048956526	0.942530479	0.106426047
Q3THW5;P0C0S6	-1.049363633	0.94196706	0.107396572
P17563;Q63836	-1.049223579	0.942161081	0.107062497
Q9CQN6	-1.049161091	0.942247583	0.106913508
Q5SX40;Q8BVF4	-1.048535137	0.943111872	0.105423265
Q8BHD0	-1.048309558	0.943422358	0.104887199
Q9D483	-1.04831899	0.943409386	0.104909605
Q5U458	-1.047937535	0.943933281	0.104004254
O08600	-1.047609286	0.944382921	0.103226365
P13864	-1.047407083	0.94465936	0.102747723
Q8CIF6	-1.096999006	0.860661136	0.23633787
Q8K2D3	-1.096699363	0.861299966	0.235399396
Q8VD57	-1.096691411	0.86131689	0.23537452
Q6P1Y8	-1.097553583	0.859472943	0.23808064
Q61249	-1.098045221	0.858413172	0.239632049
O54962	-1.097810858	0.858919121	0.238891737
Q8BUK6	-1.097852155	0.85883007	0.239022085
Q3UMT1	-1.098334389	0.857786989	0.2405474
Q7TPH6	-1.098211068	0.858054296	0.240156772
Q8BH86	-1.09818973	0.85810051	0.24008922
Q8BX57	-1.098567151	0.857281401	0.24128575
Q921F2	-1.098766825	0.856846579	0.241920246
O35594	-1.098649139	0.857102983	0.241546156
Q91VY9	-1.098695955	0.857001026	0.241694929
Q9JKK1	-1.099031632	0.856268328	0.242763304
Q9QWW1	-1.099209134	0.855879704	0.24332943
Q3V1T4	-1.09942696	0.85540167	0.24402529
Q8BGI5	-1.099640333	0.854932202	0.244708131
Q91YD4	-1.09968698	0.854829406	0.244857575
Q921X9	-1.100296491	0.853480941	0.24681555
Q9DCT5	-1.099944639	0.854260576	0.245684063
Q6PHN9	-1.100755204	0.852459521	0.248295683
Q8BMD8	-1.100692989	0.85259839	0.248094599
Q9JLH8	-1.100706622	0.852567967	0.248138655
P13541	-1.100597513	0.852811294	0.247786219
Q9CQG9	-1.10052302	0.852977238	0.247545781
Q9DBJ6	-1.101197346	0.851469582	0.249727765
P43406	-1.100905789	0.852122967	0.248782822
Q9R0X4;Q32MW3	-1.100984759	0.851946224	0.249038535
P55002	-1.106433795	0.839316867	0.267116928
Q69Z38	-1.10636052	0.839492676	0.266867844
P30416	-1.106325201	0.839577355	0.266747846
Q91XB7	-1.106315721	0.839600079	0.266715642
Q8R0G7	-1.105911013	0.84056744	0.265343573
Q9DBX1	-1.105907052	0.840576881	0.265330171
P13542	-1.106074756	0.840176675	0.26589808
Q8C0I1	-1.106024991	0.840295525	0.265729466
Q8BHD8	-1.105398505	0.841785067	0.263613438
Q9ET22	-1.10562135	0.841256638	0.264364712
Q9WVL6	-1.105504987	0.84153276	0.263972227
Q61301;REV__Q9JMB1	-1.105546484	0.841434339	0.264112144
Q9EP71	-1.105536185	0.841458771	0.264077414
Q8BJS4	-1.104703128	0.843424149	0.261278979
O70324	-1.105102682	0.842484173	0.262618509
Q8BLF1	-1.105123571	0.842434895	0.262688677
E9PWW6	-1.104106664	0.84481835	0.259288313
Q6ZPJ0	-1.103115068	0.847112707	0.256002361
Q61792	-1.103475679	0.846281673	0.257194006
Q78YZ6	-1.103346699	0.846579344	0.256767355
Q6P4S8	-1.102397966	0.848754094	0.253643872
P82198	-1.102473619	0.848581624	0.253891995
P51655	-1.102520647	0.848474334	0.254046313
Q08775	-1.102528539	0.848456321	0.254072218
Q61420	-1.102627636	0.848230006	0.254397629
Q923J1	-1.10264751	0.848184584	0.254462926
Q9Z2X1	-1.10282958	0.847767937	0.255061643
E9PWW9	-1.102781075	0.847879029	0.254902046
Q9DBG5	-1.102769782	0.847904884	0.254864897
P07742	-1.101664298	0.850418248	0.251246051
Q8CDA1	-1.101611809	0.850536729	0.25107508
P30677	-1.102152867	0.849311732	0.252841135
Q08091	-1.101987447	0.849687128	0.252300319
E9QAT4	-1.115242183	0.816804723	0.29843746
A6X8Z5	-1.115580704	0.815879038	0.299701665
P52795	-1.115734186	0.815457697	0.300276489
Q8VE95	-1.113801242	0.82069049	0.293110753
Q9R257	-1.114050529	0.820024437	0.294026091
P97350	-1.114411596	0.819055176	0.29535642
Q8VD62	-1.114424706	0.819019879	0.295404827
Q6P8J7	-1.114908448	0.817712489	0.297195959
Q62283	-1.114738484	0.818172969	0.296565515
Q8K1Y2;Q8BZ03	-1.114820824	0.81795004	0.296870784
Q9D0K2	-1.118253422	0.80838955	0.309863872
Q9JLC4	-1.118480459	0.807737909	0.31074255
P35293	-1.117957884	0.809234066	0.308723819
Q9ERG2	-1.117442257	0.81069752	0.306744737
Q9Z103	-1.117439311	0.810705846	0.306733465
Q8BSM7	-1.117691766	0.809990934	0.307700832
Q99KK1	-1.117620946	0.810191788	0.307429159
Q9QZQ1	-1.117591299	0.810275799	0.3073155
E9Q411	-1.116115338	0.814406873	0.301708465
Q3UPH7	-1.116105009	0.814435435	0.301669574
Q60596	-1.116452392	0.813472238	0.302980155
Q62172	-1.116447727	0.81348521	0.302962517
Q8C6G8	-1.116393041	0.813637184	0.302755857
Q99JT9	-1.116352712	0.813749176	0.302603537
Q91VR2	-1.117176475	0.811446979	0.305729496
B2RVL6	-1.116995502	0.811955414	0.305040088
Q9R1Z8	-1.116950687	0.812081084	0.304869603
Q9WUN2	-1.116895835	0.812234777	0.304661058
O35857	-1.116815511	0.812459592	0.30435592
Q3UV70	-1.116848417	0.812367529	0.304480888
Q8C3W1	-1.116850822	0.812360797	0.304490025
O54750	-1.107289872	0.83725004	0.270039832
Q8BP92	-1.107190919	0.837490161	0.269700758
Q9CS72	-1.10723988	0.837371392	0.269868488
O88879	-1.107673209	0.836316775	0.271356434
Q9EPL2	-1.107690703	0.836274067	0.271416637
P12787	-1.107546274	0.836626347	0.270919927
Q8BIE6	-1.107583276	0.83653616	0.271047117
Q3UMG5	-1.108974536	0.833111761	0.275862775
Q8VHK1	-1.108758276	0.833648388	0.275109889
Q8K1Z0	-1.109831812	0.83096846	0.278863352
P97310	-1.109971848	0.83061588	0.279355967
Q8C863	-1.109961203	0.830642705	0.279318499
Q7TSH2	-1.109660785	0.831398118	0.278262667
P46062	-1.109410456	0.832025133	0.277385323
Q8K4L3	-1.109400998	0.83204878	0.277352218
O70310	-1.111991556	0.825450941	0.286540614
Q9Z0F8	-1.111882401	0.82573398	0.286148421
Q9WVQ1	-1.112134813	0.82507878	0.287056033
P36536	-1.112247346	0.824785878	0.287461468
Q922Y1	-1.112313911	0.824612394	0.287701516
Q68FF7	-1.112606049	0.823848973	0.288757076
Q6ZWQ0	-1.112478272	0.824183293	0.288294979
Q9WV86	-1.112469916	0.824205131	0.288264785
Q8CCA0	-1.112875153	0.823142789	0.289732364
Q32M07	-1.113109247	0.82252615	0.290583097
O09165	-1.113142615	0.822438076	0.290704539
Q9D1J3	-1.113131845	0.822466507	0.290665338
Q9CPQ1	-1.110385223	0.829570987	0.280814235
P14901	-1.110451616	0.829402588	0.281049027
Q8BG07	-1.110466675	0.82936437	0.281102305
Q3TV70	-1.110580461	0.829075328	0.281505133
Q8BZX4	-1.110718198	0.828724813	0.281993385
Q04735	-1.111696904	0.826213936	0.285482969
Q8K3X4	-1.111467964	0.826804496	0.284663468
Q3UMF0	-1.110936215	0.828168575	0.28276764
Q80YR4	-1.111214247	0.827456664	0.283757583
E1U8D0	-1.111371669	0.827052302	0.284319367
Q569Z5	-1.111306349	0.827220198	0.284086151
Q3UHC1	-1.055420184	0.933377661	0.122042523
O09012	-1.056093722	0.932397622	0.123696101
P55772	-1.05617377	0.932280806	0.123892964
Q8K2I4	-1.055003272	0.933981737	0.121021535
Q8K4P0	-1.05490024	0.934130724	0.120769516
Q9JI11	-1.054644057	0.934500656	0.120143401
Q8K3H0	-1.054731264	0.934374809	0.120356455
P59470	-1.054786957	0.934294396	0.120492562
Q9DC53;Q8JZW4	-1.054784447	0.934298021	0.120486426
Q8BH44	-1.053966074	0.935476165	0.118489909
P59281	-1.053718263	0.935831462	0.117886801
Q8BIK4	-1.053579763	0.93602974	0.117550023
O54916	-1.061895378	0.923737269	0.138158109
Q3U1F9	-1.061484362	0.924364095	0.137120267
Q6NT99	-1.06168162	0.924063524	0.137618096
Q80Y17	-1.060589516	0.925721628	0.134867888
Q9JHI5	-1.06073455	0.925502266	0.135232284
O88428	-1.061189047	0.924813188	0.136375859
Q9QWI6	-1.061042502	0.925035644	0.136006858
B2RY04	-1.057920821	0.929713019	0.128207802
Q3LR78	-1.059976564	0.926645896	0.133330668
Q8HWB2;Q4KN81	-1.059916116	0.9267368	0.133179316
Q8K4G1	-1.059467001	0.927410826	0.132056175
P25425	-1.059113032	0.927940363	0.131172669
Q5NCE8	-1.059261246	0.927718816	0.131542429
Q570Y9	-1.064791641	0.919260229	0.145531412
Q8BRN9	-1.064934511	0.91903661	0.1458979
Q7TMW6	-1.064571381	0.919604462	0.144966919
Q80T85	-1.064378065	0.919906069	0.144471996
Q9D1Q6	-1.062786519	0.922371023	0.140415496
Q8C2Q3	-1.063752545	0.920878705	0.142873839
Q8JZS9	-1.063672993	0.921002044	0.142670949
Q69ZQ1	-1.064033428	0.920442573	0.143590855
Q9Z0J1	-1.063900424	0.920649216	0.143251208
Q8CA95	-1.065577908	0.918026272	0.147551637
Q9CQC7	-1.06581447	0.917653432	0.148161038
E9Q3L2	-1.06626389	0.916943081	0.149320808
Q8BKU8	-1.066308088	0.916873077	0.149435011
Q9R0P6	-1.066445976	0.916654514	0.149791462
Q921H9	-1.066506548	0.916558423	0.149948124
Q921M3	-1.066538603	0.916507552	0.150031051
Q91VU7	-1.06726046	0.915358317	0.151902143
Q9R1P1	-1.06719696	0.915459693	0.151737267
Q8R527	-1.066896612	0.915938456	0.150958155
Q8VHL1	-1.067041767	0.915707226	0.151334541
Q61190	-1.067806155	0.914484884	0.153321271
P61406	-1.06806325	0.91407198	0.15399127
Q9Z329	-1.068285899	0.913713665	0.154572234
O08736	-1.070984981	0.909315146	0.161669835
Q8C0L8	-1.070950645	0.909371747	0.161578898
Q8K3K7	-1.070953346	0.909367295	0.161586051
P42232	-1.071553489	0.90837551	0.163177978
Q4VGL6	-1.071349006	0.90871402	0.162634986
P97454;P70340	-1.068945335	0.912648424	0.156296911
Q91VA6	-1.069400445	0.911909735	0.15749071
Q8R5C8	-1.069919566	0.911063613	0.158855953
A2A791	-1.069812871	0.911237826	0.158575045
Q9CQI6	-1.069779979	0.911291501	0.158488478
P06344	-1.070623448	0.909910275	0.160713173
P97384	-1.070613836	0.909926072	0.160687764
Q8K0D5	-1.070467676	0.910166119	0.160301557
Q91W18	-1.070316316	0.910414387	0.159901929
F6ZDS4	-1.075067805	0.902461171	0.172606634
P15089	-1.075002985	0.902571947	0.172431038
P97352	-1.075332977	0.90200732	0.173325657
Q99LC9	-1.075219662	0.902201395	0.173018268
Q8VD75	-1.07422526	0.903896037	0.170329223
Q8BSQ9	-1.074287511	0.903790395	0.170497116
Q8K2Q5	-1.074310851	0.90375077	0.170560081
Q91XC9	-1.074672855	0.903135131	0.171537723
Q9JLB9	-1.074479063	0.903464951	0.171014112
Q7TMY7	-1.072274091	0.907177751	0.165096341
Q9JMH9	-1.072205792	0.907291601	0.164914191
Q9WVA4	-1.072207646	0.907288512	0.164919134
P11152	-1.072582901	0.906662131	0.16592077
P47964	-1.072770605	0.906348032	0.166422573
P68134	-1.073534076	0.905065071	0.168469005
P58465	-1.073696833	0.904790441	0.168906391
O08539	-1.073723876	0.904744771	0.168979105
Q9JKY5	-1.073722595	0.904746934	0.168975661
Q8VEK6	-1.073373476	0.90533567	0.168037806
Q9ERY9	-1.073315614	0.905433071	0.167882543
Q924K8	-1.073088304	0.905815216	0.167273088
Q99LF4	-1.073228693	0.90557929	0.167649403
P21844	-1.083767544	0.88697207	0.196795474
P61202	-1.083832966	0.886850646	0.19698232
Q99PG2	-1.082922254	0.888533948	0.194388306
B8JK39	-1.083473846	0.887516215	0.195957631
P52825	-1.083253123	0.887924127	0.195328996
Q7TQ48	-1.083158074	0.888099513	0.195058561
Q9DCU2	-1.083172819	0.888072316	0.195100503
Q9CR53	-1.081002032	0.892034734	0.188967298
Q9EQW7	-1.081312977	0.89147223	0.189840747
Q9CZ13	-1.082365311	0.889556019	0.192809291
E9Q9K5	-1.082228565	0.889806124	0.192422441
P12815	-1.082290114	0.889693593	0.192596521
Q3TPE9	-1.081928986	0.890352889	0.191576097
Q8VDN4	-1.081607902	0.890937154	0.190670748
P38585	-1.081711876	0.890748154	0.190963722
Q69ZP3	-1.081669216	0.890825723	0.190843493
G3X9Z4	-1.077386245	0.898455766	0.178930479
Q9CR20	-1.077476727	0.898297715	0.179179012
A0A571BF63	-1.076966277	0.899187628	0.177778649
Q8BGQ6	-1.077005104	0.899120084	0.177885021
O35375	-1.077240263	0.898710484	0.178529778
P11103	-1.077203533	0.898774518	0.178429015
P98197	-1.077172032	0.89882942	0.178342613
Q80YV3	-1.076525176	0.899953283	0.176571893
Q5XJY4	-1.076009588	0.900844325	0.175165263
Q8VEA4	-1.07616784	0.900571279	0.175596561
Q02013	-1.079865515	0.894076587	0.185788928
Q08943	-1.080297398	0.893303267	0.186994131
Q8CFI7	-1.080373205	0.893167201	0.187206004
Q8K1N1	-1.078912381	0.89577214	0.183140241
Q8R322	-1.079153953	0.895343838	0.183810114
Q9JLQ2	-1.077963412	0.897445318	0.180518094
P32261	-1.078202776	0.897024676	0.1811781
Q9Z1L5	-1.078381647	0.896709729	0.181671918
Q6R0H7	-1.085871043	0.883028242	0.2028428
Q9CQ54	-1.085565908	0.883605481	0.201960427
Q9EQC8	-1.08469776	0.885238188	0.199459572
Q70KF4	-1.085102669	0.884478444	0.200624225
Q8R5K2	-1.085054926	0.884568184	0.200486742
Q80YA9	-1.085292651	0.884120917	0.201171734
Q63918	-1.085216094	0.884265071	0.200951023
Q8JZN7	-1.085233523	0.884232262	0.201001261
P21126	-1.089303575	0.876409669	0.212893906
Q793I8	-1.089225941	0.876561969	0.212663971
Q99JB2	-1.089161821	0.876687664	0.212474157
Q5DTU0	-1.088596196	0.877792838	0.210803358
Q5DU41	-1.088315405	0.878339067	0.209976339
Q91VC4	-1.08841138	0.878152544	0.210258836
P70313	-1.087609181	0.879705918	0.207903263
P28028	-1.087385814	0.880136169	0.207249645
Q8VCE2	-1.087483366	0.879948385	0.207534981
Q8R0F3	-1.086836411	0.881190262	0.205646149
Q9JLB2	-1.086490903	0.881850144	0.20464076
Q9JK37	-1.095573708	0.86368033	0.231893378
P35279	-1.094950141	0.864985923	0.229964218
Q3TIX6	-1.095334915	0.864181388	0.231153527
Q8CEC0	-1.095284837	0.864286294	0.230998543
Q9R1S8	-1.095199819	0.864464261	0.230735559
Q9Z2I8	-1.095121113	0.864628864	0.230492249
P23475	-1.093813028	0.867343395	0.226469633
Q78PY7	-1.093996299	0.86696545	0.227030848
G5E8V9	-1.094334656	0.86626566	0.228068997
P70268	-1.094352479	0.866228726	0.228123752
O88393	-1.09455936	0.865799468	0.228759893
Q3ULD5	-1.094590325	0.865735134	0.228855191
Q5SWU9	-1.09192304	0.871196905	0.220726135
P62932	-1.092336593	0.870360485	0.221976108
Q91Z67	-1.092338105	0.870357422	0.221980683
Q8C0T5	-1.092281979	0.870471159	0.22181082
Q8K2J0	-1.092302071	0.870430451	0.221871619
Q3UBX0	-1.093268918	0.868460972	0.224807946
Q99PL5	-1.092980225	0.869051223	0.223929002
Q9D708	-1.092856653	0.869303305	0.223553348
P0C0A3	-1.089853073	0.875328126	0.214524947
P63325	-1.090186889	0.874668035	0.215518853
Q02789;Q01815;Q99246	-1.090436712	0.874172505	0.216264207
Q9CZU6;Q80X68	-1.090315464	0.874413167	0.215902298
Q9CQV8	-1.091470348	0.872108211	0.219362137
Q9CXK9	-1.091421217	0.872206849	0.219214368
Q05D44	-1.090945314	0.873159613	0.217785702
Q8BHC9	-1.090994114	0.873062139	0.217931974
E9Q9K8	-1.090791865	0.87346579	0.217326075
Q8BH82	-1.09066539	0.873717768	0.216947622
Q91WU0;Q64176;D3Z298	-1.109316813	0.277057692	0.832259121
O35134	-1.109618541	0.278114457	0.831504084
Q9DBG6	-1.10963771	0.278181701	0.831456009
Q8BYL4	-1.110011812	0.279496681	0.830515131
Q9D2N9	-1.109943304	0.279255501	0.830687803
Q91XU0	-1.110525578	0.281310775	0.829214802
Q9Z321	-1.1103024	0.280521568	0.829780832
Q8C7E7	-1.111046661	0.283160543	0.827886118
Q9CR10	-1.110977073	0.282912935	0.828064137
Q62167;P16381	-1.111574548	0.285044742	0.826529806
Q78J03	-1.111343691	0.284219454	0.827124237
Q99KW3	-1.111410539	0.284458222	0.826952317
P46656	-1.111938684	0.286350589	0.825588095
Q6EDY6	-1.112186101	0.287240753	0.824945348
Q6P9S0	-1.112159068	0.28714338	0.825015689
Q9QZJ6	-1.113089746	0.290512144	0.822577602
O54946;Q9QYI8	-1.112438203	0.288150204	0.824287999
Q8JZX4	-1.1128268	0.289556914	0.823269886
Q9DCC7	-1.112702055	0.289104694	0.823597361
Q9JM51	-1.112740436	0.289243764	0.823496671
A6H6E2	-1.115720431	0.30022493	0.815495501
P51863	-1.115510109	0.299437618	0.81607249
Q3TC93	-1.115497546	0.299390653	0.816106893
Q8VHI6	-1.115114074	0.297960329	0.817153746
Q9CYG7	-1.115079301	0.297830939	0.817248362
E9Q9R9	-1.115257669	0.298495185	0.816762484
O35732	-1.115332123	0.298772858	0.816559266
P20108	-1.113850775	0.293292425	0.820558349
Q68FE2	-1.114503296	0.295695147	0.818808148
Q8BG54	-1.114600734	0.296055458	0.818545276
Q91XY0;Q91XX6;Q91XZ0;Q91XY7;Q91XY3;Q91XY2;Q91XY8;Q6DD96	-1.118162368	0.309512176	0.808650191
Q6P6J9	-1.117549326	0.307154655	0.810394671
Q8K124	-1.117917189	0.308567162	0.809350026
Q9ET54;Q5DTJ9	-1.117795758	0.308100185	0.809695573
P47963	-1.117725581	0.307830633	0.809894948
Q9ERG0	-1.117715042	0.307790173	0.809924869
Q07417	-1.117202602	0.305829151	0.811373451
Q9EQ28	-1.116947361	0.304856952	0.812090408
Q8BZ36	-1.116582418	0.3034721	0.813110318
Q9D0Q7	-1.116150419	0.301840586	0.814309833
Q8K0C8	-1.123570183	0.331150027	0.792420156
P98063	-1.12403349	0.333081086	0.790952403
Q80WT5	-1.124053505	0.333164811	0.790888694
B1AVP0	-1.122951624	0.328592283	0.794359341
Q9QXS6	-1.122741497	0.327728613	0.795012884
Q9QVP9	-1.122172406	0.325402476	0.79676993
Q922R8	-1.122308986	0.325959033	0.796349953
Q9CU62	-1.122425205	0.326433462	0.795991743
Q5FWK3	-1.118771725	0.311873497	0.806898227
P97490	-1.119197757	0.3135353	0.805662458
Q9D706	-1.119213	0.313594922	0.805618077
P25916;P23798	-1.120040374	0.316849113	0.803191261
Q8BGH7	-1.119932742	0.316423786	0.803508956
P23116	-1.119570674	0.31499741	0.804573264
O88597	-1.119760703	0.315745191	0.804015512
Q8K1R3	-1.119740424	0.315665304	0.80407512
Q8CGN5	-1.121731956	0.323614921	0.798117035
Q00519	-1.121370282	0.322155233	0.79921505
Q8BJM7	-1.121287838	0.321823508	0.79946433
A0A1L1SUI3	-1.121245751	0.321654313	0.799591438
P17156	-1.121265602	0.321734105	0.799531497
P05555	-1.120858098	0.320100433	0.800757665
Q9CWP8	-1.12071943	0.319546571	0.801172858
Q7TPD0	-1.12034243	0.318045978	0.802296452
O35216	-1.120533656	0.318806182	0.801727475
Q8K2L8	-1.120491738	0.318639372	0.801852366
Q08857	-1.127847738	0.349518621	0.778329117
Q9Z127;Q8BGK6	-1.127587306	0.348363499	0.779223806
Q8BFR5	-1.128234817	0.351245034	0.776989784
Q05421	-1.128180155	0.351000533	0.777179622
Q64324	-1.128141736	0.350828829	0.777312907
P30355	-1.128426261	0.352103183	0.776323078
P29699	-1.128327275	0.35165912	0.776668155
Q99NH2	-1.128349083	0.351756887	0.776592196
Q9Z0R4;CON__ENSEMBL:ENSBTAP00000001528	-1.129778804	0.358249885	0.771528919
Q8CFH6	-1.13002498	0.359385015	0.770639965
Q9JL26	-1.130136173	0.359899444	0.77023673
O09106	-1.129233234	0.355752482	0.773480752
P52431	-1.128761333	0.353612097	0.775149236
P70698	-1.128942514	0.354431735	0.774510779
Q9JIX8	-1.128981551	0.35460868	0.774372871
P46660	-1.124660952	0.335717795	0.788943157
Q9JJC6	-1.124492167	0.335006066	0.789486101
Q9QYE6	-1.124457879	0.334861704	0.789596174
Q80TS7	-1.125481598	0.339204719	0.78627688
Q923W1	-1.125099558	0.337575919	0.78752364
Q99K90	-1.125106901	0.33760713	0.78749977
P62257	-1.127278418	0.347000048	0.78027837
P19324	-1.126941037	0.34551886	0.781422176
P97443	-1.127027732	0.345898682	0.78112905
Q640N1	-1.127086731	0.346157476	0.780929255
P11688	-1.12639702	0.343147798	0.783249222
Q9D0R8	-1.126348204	0.342936066	0.783412138
O70439	-1.126028995	0.341555637	0.784473358
Q8BX70	-1.125770577	0.340443258	0.785327318
Q2EMV9	-1.132555406	0.371370829	0.761184576
Q62192	-1.132388579	0.370561777	0.761826802
Q6P5E8	-1.132304384	0.370154525	0.76214986
Q8R516	-1.133156064	0.374307389	0.758848675
Q9EPM5	-1.133140858	0.374232585	0.758908273
Q8K297	-1.132837235	0.372744019	0.760093215
Q3TVI8	-1.132940514	0.373249285	0.759691229
P61166	-1.132888924	0.372996756	0.759892168
Q9D1E6	-1.132913936	0.373119155	0.759794781
Q0VGU4	-1.131483527	0.366220411	0.765263117
Q8VDS4	-1.131379179	0.365724931	0.765654248
Q80U72	-1.131308583	0.365390298	0.765918285
Q9D7S7	-1.131307219	0.365383835	0.765923384
Q80XI3	-1.130582616	0.36197576	0.768606855
Q9D8P7	-1.130879265	0.363365225	0.76751404
Q9DBL9	-1.131028853	0.364068897	0.766959955
Q99LB0	-1.1340219	0.378607799	0.755414101
Q06770	-1.1343382	0.380199488	0.754138712
Q8C6N3	-1.134342993	0.380223694	0.754119299
Q03141	-1.134206731	0.379536527	0.754670204
Q8BI84	-1.134195293	0.379478941	0.754716352
Q9R1L5	-1.135205173	0.384621953	0.75058322
P68404	-1.134650185	0.381780708	0.752869477
Q8CH77	-1.1345995	0.381523052	0.753076448
Q8BH79	-1.134628515	0.381670515	0.752958
Q9ESB3	-1.134618065	0.381617393	0.753000672
Q9CRC8	-1.134921337	0.383164252	0.751757085
Q01147	-1.134759202	0.382335915	0.752423286
Q9D6G5	-1.134827095	0.382682397	0.752144698
Q3TLD5	-1.135750845	0.38745227	0.748298575
Q75N73	-1.135718881	0.387285447	0.748433435
A2AJQ3	-1.135803977	0.387729863	0.748074114
O88559	-1.135861626	0.388031466	0.74783016
Q71RI9	-1.136180725	0.38970869	0.746472034
Q80Y56	-1.13628306	0.390249414	0.746033646
Q9R0G7	-1.13626497	0.390153725	0.746111245
Q9WTU6	-1.135983273	0.388669292	0.74731398
Q62059	-1.136069708	0.389123666	0.746946042
Q9ER64	-1.136114127	0.389357544	0.746756583
Q8BFY0	-1.137513352	0.396862722	0.740650629
Q8BPM0	-1.137462335	0.396584202	0.740878133
A0A087WQT1	-1.136594609	0.391904216	0.744690393
P51660	-1.136892507	0.393498918	0.743393589
Q78RX3	-1.136838136	0.393206939	0.743631196
Q3UZP4	-1.141163312	0.417906441	0.723256871
Q9CSV6	-1.140924771	0.416455894	0.724468877
Q8VDP4	-1.141044014	0.417179522	0.723864493
P56960	-1.141027587	0.417079655	0.723947931
Q9R0H0	-1.141026819	0.417074992	0.723951828
Q64288	-1.140273658	0.412555139	0.727718519
Q9DBS1	-1.140348471	0.412999099	0.727349372
Q9CWU9	-1.140755718	0.415434989	0.72532073
Q8R0G9	-1.140518598	0.414012712	0.726505886
Q9Z1T6	-1.140636352	0.414717618	0.725918734
P84089	-1.138360739	0.40154648	0.736814259
Q9WTP6	-1.138105507	0.400124099	0.737981409
P97465	-1.139732092	0.40937284	0.730359252
Q8BX02	-1.139121784	0.40585026	0.733271524
Q9JJ59	-1.139118738	0.405832844	0.733285894
P43274	-1.138844677	0.4042721	0.734572577
O89114	-1.138899438	0.404582949	0.73431649
Q3U7R1	-1.138888122	0.404518671	0.734369451
Q80U57	-1.142316553	0.425094356	0.717222197
Q8K1S6	-1.14227634	0.424838575	0.717437766
Q6ZWX6	-1.142074962	0.423563463	0.718511499
Q99MR8	-1.142093367	0.423679605	0.718413762
Q8CJ69	-1.142175449	0.424198538	0.717976911
Q99LM2	-1.142196519	0.424332004	0.717864515
Q8C8U0	-1.142781996	0.428083701	0.714698296
Q925F2	-1.142625739	0.427074128	0.715551611
P28063	-1.14250649	0.426307771	0.716198719
Q6P3B9	-1.142552659	0.426604059	0.7159486
Q499X9	-1.143836255	0.435064316	0.708771939
Q9Z123	-1.143888373	0.435417477	0.708470896
Q91XD7	-1.14400492	0.436210129	0.707794791
Q9D945	-1.144061339	0.436595298	0.707466041
P35383	-1.143391897	0.43208496	0.711306937
Q9DCG9	-1.14319154	0.430759599	0.712431941
Q9QYP6	-1.143017349	0.429616093	0.713401256
A2A699	-1.145009849	0.443220998	0.701788852
P10107	-1.145054125	0.443537576	0.701516549
Q3U2A8	-1.14506227	0.443595883	0.701466387
Q9QZI9	-1.144953894	0.44282188	0.702132013
Q6NZF1	-1.144855666	0.442123851	0.702731815
Q9QY81	-1.144878371	0.442284908	0.702593463
Q80SU7	-1.144598787	0.440313741	0.704285046
Q9JIG7	-1.14456627	0.440086158	0.704480112
Q9JL04	-1.144571949	0.440125883	0.704446066
A2AM05	-1.144394087	0.438886763	0.705507324
Q6NWW9	-1.144345893	0.438552749	0.705793144
P06909	-1.145490608	0.446695906	0.698794701
Q3V1D3	-1.145559922	0.447203894	0.698356028
Q8C5H8	-1.145331826	0.445538986	0.699792841
Q9CX30	-1.145228377	0.444790193	0.700438184
Q58A65	-1.14528459	0.445196598	0.700087992
Q99PM3	-1.145267487	0.445072824	0.700194662
P29351	-1.146139683	0.451526142	0.694613541
Q4VAC9	-1.146136938	0.451505362	0.694631576
Q8VEM8	-1.145744878	0.448568356	0.697176522
Q9CWN7	-1.145875069	0.449536789	0.69633828
Q8R3Z5;Q8R0S4;Q8CC27	-1.061903489	0.13817861	0.923724879
Q8R4C2	-1.063052632	0.141091525	0.921961107
A6X935	-1.062641895	0.140048469	0.922593426
P42669	-1.062717803	0.140241077	0.922476727
Q9QZI8	-1.063871048	0.143176221	0.920694826
P0C7L0	-1.064982774	0.146021766	0.918961008
Q8K0X8	-1.064515864	0.144824737	0.919691128
D3Z6Q9	-1.065751413	0.147998526	0.917752887
P03930	-1.065376394	0.1470331	0.918343294
P61804	-1.065418475	0.147141338	0.918277137
Q61191	-1.066904334	0.150978174	0.915926161
P56564	-1.066353278	0.149551803	0.916801475
Q99J47	-1.066217649	0.149201358	0.917016292
Q7TPV2	-1.052038585	0.113816536	0.938222049
Q812A5	-1.052227335	0.114272404	0.937954931
Q60875	-1.053570447	0.117527377	0.93604307
Q8K4F5	-1.053540879	0.11745551	0.93608537
Q60829	-1.054056792	0.118710861	0.935345931
Q8K4I3	-1.053799169	0.118083631	0.935715538
Q6A098	-1.056859459	0.125582286	0.931277173
Q61398	-1.05637061	0.124377367	0.931993243
Q7TMY8	-1.056146675	0.123826321	0.932320354
E9Q238	-1.060210381	0.133916523	0.926293859
Q6P1H6	-1.059897748	0.133133333	0.926764415
Q8BMG7	-1.059981977	0.133344223	0.926637754
Q6PGC1	-1.058821826	0.130446935	0.928374891
Q8BN21	-1.059064487	0.131051618	0.928012869
Q9R182	-1.058008861	0.128426176	0.929582685
Q9WV30	-1.057990755	0.12838126	0.929609495
Q6GQS1	-1.057793876	0.127893089	0.929900787
Q9D486	-1.057668583	0.127582653	0.930085929
Q8C7E9	-1.027479998	0.057435671	0.970044327
Q9CQU3	-1.026705928	0.055743739	0.970962189
Q8CFE4	-1.025365628	0.052825232	0.972540397
Q9Z2D8	-1.025578464	0.053287752	0.972290712
P26450;Q9QZE2	-1.023885161	0.049617605	0.974267556
O70472	-1.024925981	0.051870925	0.973055056
Q6VNS1	-1.024537104	0.051028059	0.973509045
E9PX29	-1.029164725	0.061134487	0.968030239
Q80W68	-1.02877342	0.060273357	0.968500063
P62960;Q9Z2C8	-1.029781486	0.062494271	0.967287215
Q8BWY2	-1.030359021	0.063770365	0.966588656
Q8K010	-1.032299929	0.068078941	0.964220988
Q9CPU9	-1.031571606	0.06645851	0.965113096
O88735	-1.031536361	0.066380206	0.965156155
Q8K482	-1.031507779	0.066316711	0.965191067
P97429	-1.03391101	0.071679167	0.962231843
P31428	-1.033192717	0.070071323	0.963121394
Q9CQX8	-1.03281413	0.069225636	0.963588494
Q6A058	-1.050103101	0.109163816	0.940939285
Q922Q4;Q922W5	-1.048713721	0.105848021	0.9428657
Q8BPE4	-1.045144871	0.097420522	0.947724349
Q3TYX2	-1.046638855	0.100932958	0.945705897
Q61827;O54791;O54790	-1.046380587	0.100324178	0.946056408
Q3UHC7;F6SEU4	-1.038066054	0.081067102	0.956998952
Q91VX9	-1.037974121	0.080857749	0.957116372
Q60803	-1.035873784	0.076095146	0.959778638
Q6P9K9	-1.03553909	0.075339782	0.960199308
Q61771	-1.043236611	0.09296573	0.950270881
P52503	-1.044035683	0.094826878	0.949208805
Q9JKX4	-1.043691031	0.094023387	0.949667644
P21550	-1.041904156	0.089875754	0.952028402
Q71LX4	-1.040705517	0.087110308	0.953595209
Q61554	-1.0412772	0.088427606	0.952849595
Q6P9N1	-1.041267769	0.088405849	0.95286192
Q6PFD9	-1.095867403	0.232805193	0.863062209
Q9ES28	-1.095798504	0.232591102	0.863207402
Q9D7E4	-1.096257141	0.234018382	0.862238759
Q8QZS1	-1.09660579	0.235106782	0.861499008
Q9EPE9	-1.096633676	0.235193962	0.861439714
P70388	-1.098313789	0.240482122	0.857831667
Q3UWW6	-1.098172109	0.240033446	0.858138662
Q64449	-1.097399522	0.237595732	0.85980379
Q8VD04	-1.097603011	0.238236338	0.859366673
Q80XQ2	-1.097559045	0.238097842	0.859461204
Q8BMP6	-1.097526179	0.237994342	0.859531837
P54310	-1.094216648	0.227706625	0.866510023
Q9WV18	-1.094563968	0.228774073	0.865789895
O09005	-1.093398575	0.225203304	0.868195271
Q9Z2V5	-1.093250152	0.224750755	0.868499397
Q6ZQ08	-1.093791388	0.226403417	0.867387971
Q8BG58	-1.093583646	0.225768292	0.867815354
P83741;Q80UE6	-1.091752356	0.220211327	0.871541029
Q9DBZ9	-1.09141245	0.219188005	0.872224445
P08207	-1.092281074	0.221808083	0.870472992
Q60714	-1.09282228	0.223448915	0.869373364
Q76I79	-1.09297719	0.223919772	0.869057419
D4AFX7	-1.100435089	0.247262165	0.853172923
Q9QZC2	-1.100699925	0.248117012	0.852582913
P28301	-1.100728635	0.248209799	0.852518837
Q3USJ8	-1.100731384	0.248218683	0.852512701
P30999;O35927	-1.099681101	0.244838736	0.854842365
O88811	-1.100030422	0.245959618	0.854070804
Q6NZJ6	-1.099863763	0.245424448	0.854439315
Q62217	-1.101816247	0.251741418	0.85007483
P04186	-1.101575203	0.250955891	0.850619312
Q9D164	-1.101553182	0.25088421	0.850668972
Q8BM55	-1.102812831	0.255006524	0.847806306
Q8K0E8	-1.102448432	0.25380937	0.848639062
Q9JHC9	-1.102180553	0.252931726	0.849248827
Q8BTZ4	-1.104953642	0.262118272	0.84283537
Q8CFB4	-1.104539747	0.260732636	0.843807111
Q922S4	-1.103484908	0.257224555	0.846260353
O54781;Q9Z0G2	-1.104228261	0.259693268	0.844534993
Q8BU11;Q80W03;A2A472;Q66JW3	-1.103969738	0.258832838	0.8451369
Q3TMP8	-1.106501064	0.267345745	0.839155319
Q9Z2E9	-1.106357733	0.266858372	0.839499361
P52479	-1.10601266	0.265687696	0.840324964
Q9DAW9	-1.10562764	0.26438594	0.841241699
P53564;P70298	-1.107236764	0.26985781	0.837378954
Q8BGS1	-1.107390896	0.270386336	0.83700456
Q80TA9	-1.108208287	0.27320239	0.835005897
O88492	-1.107884779	0.272085178	0.835799601
P58466	-1.107757946	0.27164813	0.836109817
Q9WTX2	-1.107681175	0.271383845	0.83629733
Q2YDW2	-1.075460843	0.17367276	0.901788083
Q99JR1	-1.075270834	0.173157056	0.902113778
P06728	-1.07518626	0.172927695	0.902258565
P51885	-1.075209847	0.172991652	0.902218196
Q8VHQ3	-1.074832301	0.171968968	0.902863333
Q9JHA8	-1.07447868	0.171013078	0.903465602
Q9R0L7	-1.074525152	0.171138589	0.903386563
Q8BYR8	-1.077430564	0.179052197	0.898378367
Q8VCT9	-1.077162775	0.178317225	0.89884555
Q8BWQ6	-1.076650229	0.176913695	0.899736533
Q9CQ18	-1.076019961	0.175193522	0.900826439
Q61542	-1.069133756	0.156790808	0.912342948
Q9DC69	-1.069287392	0.157193892	0.9120935
Q00560	-1.070987479	0.161676452	0.909311027
Q8VEC4	-1.071042991	0.16182351	0.909219481
Q5S006	-1.070631052	0.160733274	0.909897777
P47857	-1.070429909	0.160201812	0.910228097
Q8CGB6;Q8BZ33	-1.070503287	0.160395625	0.910107662
P26231	-1.072388469	0.165401531	0.906986938
Q6P3Y5	-1.071851142	0.163969463	0.907881679
Q8C6K9	-1.072868453	0.166684361	0.906184091
Q61581	-1.073071804	0.16722888	0.905842925
Q922G0	-1.0731845	0.167530911	0.905653589
Q8R1G6;REV__A2AP83	-1.073708591	0.168938007	0.904770585
P01897;P01896;P14427	-1.074148243	0.170121585	0.904026658
Q9Z0K8	-1.074130449	0.170073625	0.904056824
Q7TSC1	-1.089655349	0.213937338	0.875718011
Q9D6R2	-1.08990232	0.214671429	0.87523089
Q9QYI4	-1.090121485	0.215323936	0.874797548
Q8VC65	-1.089114224	0.212333308	0.876780916
Q69ZN7;REV__Q8QZT1	-1.088694895	0.211094437	0.877600458
Q8K2H2	-1.08838038	0.210167569	0.878212811
Q9DBA9	-1.088357141	0.210099162	0.878257978
Q8BZN6	-1.08766592	0.208069449	0.879596471
Q61526	-1.086921311	0.205893554	0.881027757
Q9D1D4	-1.087159046	0.206587081	0.880571965
Q3TIV5	-1.08581302	0.202674877	0.883138143
Q3U0M1	-1.085567225	0.201964232	0.883602993
Q99NF3	-1.086524343	0.204737965	0.881786379
Q06185	-1.086298089	0.204080695	0.882217394
Q922B9	-1.086142951	0.203630586	0.882512365
P37889	-1.079563793	0.184948819	0.894614974
Q9JLF6	-1.080604763	0.187853789	0.892750974
P70402	-1.080788371	0.188368088	0.892420283
Q61193;Q03385	-1.080710878	0.188150955	0.892559923
Q1XH17	-1.081897985	0.191488606	0.89040938
Q921I2	-1.083099042	0.194890683	0.888208358
Q99LJ6	-1.082809242	0.194067451	0.888741791
P62631	-1.084735588	0.199568249	0.885167339
Q62087	-1.08511983	0.200673654	0.884446176
Q8R5H6	-1.084304245	0.198330617	0.885973628
Q71B07	-1.083963951	0.197356649	0.886607301
Q9CXY6	-1.083752369	0.196752145	0.887000224
P26443	-1.147575342	0.684707127	0.462868215
Q8BMB3	-1.14764656	0.684188719	0.463457841
O35450	-1.146585988	0.691637527	0.454948461
E9Q0S6	-1.146482017	0.692338609	0.454143408
Q8C0S1	-1.146518449	0.692093499	0.45442495
Q99JR6	-1.147211047	0.687316168	0.459894879
P28740;Q8C0N1	-1.147151434	0.687736529	0.459414905
Q91W92	-1.147164661	0.687643415	0.459521246
Q80WJ7	-1.146769433	0.690388562	0.456380871
Q8R2M2	-1.146724932	0.690692973	0.456031959
P18826	-1.146856106	0.68979301	0.457063096
Q8BRK8	-1.146983494	0.68891119	0.458072304
Q80YV2	-1.146913629	0.689395786	0.457517843
Q91V04	-1.146942777	0.689193901	0.457748876
Q5XKE0	-1.149578454	0.668874472	0.480703982
Q60841	-1.149572763	0.668923768	0.480648995
Q9CQN7	-1.149569314	0.668953622	0.480615692
Q62219	-1.149465035	0.66985139	0.479613645
Q6ZPR5	-1.149382717	0.670553377	0.478829341
P40630	-1.149214553	0.671969662	0.477244891
Q2TPA8	-1.149274949	0.671463703	0.477811246
Q7TPS5	-1.149270242	0.671503247	0.477766994
P58871	-1.148990624	0.67382008	0.475170544
Q9EP72	-1.14899317	0.673799262	0.475193908
Q9R1W5	-1.149100174	0.672919762	0.476180412
A3KGV1	-1.14903941	0.67342029	0.475619119
O88384	-1.149052457	0.673313063	0.475739394
Q64521	-1.149064655	0.67321269	0.475851965
Q8K296	-1.148751524	0.675753527	0.472997997
Q8R2Y2	-1.148708246	0.676099021	0.472609225
Q9D1J1	-1.14860859	0.676889529	0.471719061
P62071	-1.148543631	0.677401079	0.471142553
Q8R1N4	-1.148546176	0.677381097	0.471165079
P81117	-1.148382401	0.678658399	0.469724003
O54775	-1.148004861	0.681536749	0.466468112
Q921U8	-1.148165919	0.680319805	0.467846114
A2AF47	-1.148092375	0.680877474	0.467214901
Q9DBS5	-1.148091287	0.680885697	0.46720559
Q61550	-1.145807376	0.696774966	0.44903241
Q8K1N4	-1.145943627	0.695894161	0.450049465
Q8VDK1	-1.145953555	0.695829684	0.450123871
P17918	-1.145172325	0.700786239	0.444386086
Q8R4X3	-1.145164926	0.7008321	0.444332826
Q8VD33	-1.145431306	0.699168579	0.446262726
Q61048	-1.145611909	0.698025824	0.447586084
Q9CWL8	-1.145598857	0.698108823	0.447490034
Q6PGF7	-1.144918144	0.702350689	0.442567455
Q8BU31	-1.144706512	0.703636351	0.441070161
Q8CFE6	-1.144690959	0.703730242	0.440960717
Q8BX17	-1.144814049	0.70298495	0.441829099
P97789	-1.144765318	0.703280616	0.441484702
Q9CQ22	-1.144744245	0.703408223	0.441336022
P07934	-1.144094635	0.707271572	0.436823063
Q5SX39;E9Q264;REV__Q9JKK7	-1.144073181	0.707396916	0.436676265
Q8BHH2	-1.144354229	0.705743761	0.438610468
B1AR69	-1.14433734	0.705843799	0.438493541
Q3U319	-1.144322437	0.705931994	0.438390443
Q9DBM2	-1.143467293	0.710880737	0.432586556
P06797;Q9JI81	-1.143398155	0.711271619	0.432126536
Q64374	-1.143343835	0.7115778	0.431766035
P97457	-1.143569257	0.710301835	0.433267422
P54729	-1.143636764	0.709916948	0.433719816
Q99KL7	-1.143622672	0.709997399	0.433625273
Q9DB20	-1.14382891	0.708814302	0.435014608
Q4PZA2	-1.143751448	0.709260105	0.434491343
Q9ERD7	-1.143766237	0.709175127	0.43459111
Q91ZV0	-1.143200953	0.712379331	0.430821622
B0V2N1	-1.143182482	0.712482547	0.430699935
Q60676	-1.143166458	0.712572013	0.430594445
Q80YD1	-1.143092909	0.712981781	0.430111128
O70166;REV__Q9WTN3	-1.143143395	0.712700659	0.430442736
Q6PDN3	-1.143137137	0.712735543	0.430401594
Q9DBY8	-1.143018949	0.713392388	0.429626562
Q9R0M4	-1.14288733	0.714119568	0.428767762
P35123	-1.142940405	0.713826879	0.429113525
Q3TDQ1	-1.142946103	0.713795414	0.429150689
Q6ZPS2	-1.142474798	0.716370103	0.426104695
Q9DBX3	-1.142408828	0.716726068	0.425682761
O35658	-1.142772971	0.714747749	0.428025223
Q14BI5	-1.142621462	0.715574886	0.427046576
Q6PA06	-1.142649551	0.715421973	0.427227578
Q9D1F4	-1.141519798	0.721423143	0.420096655
Q01279	-1.141342681	0.72233763	0.419005051
Q9WTS2	-1.141367551	0.722209631	0.419157921
O08601	-1.141737553	0.720289392	0.421448161
Q3MI48	-1.141844879	0.719726687	0.422118192
P49717	-1.141984387	0.718991331	0.422993056
Q02257	-1.142097246	0.718393154	0.423704092
P70404	-1.141044696	0.723861027	0.417183669
D3YY49;F6RR30;Q3UT41	-1.140919642	0.724494812	0.41642483
Q9EQS3	-1.140911352	0.724536711	0.416374641
Q5PR68	-1.140621618	0.725992355	0.414629263
Q62356	-1.140788732	0.725154833	0.415633899
Q8BHZ0	-1.140768839	0.725254824	0.415514015
Q8BU30	-1.140046853	0.72883111	0.411215743
Q9R117	-1.13995878	0.729260543	0.410698237
P61022	-1.140284868	0.727663275	0.412621593
Q6PCQ0	-1.140445782	0.726867595	0.413578187
Q5DTX6	-1.136612161	0.744614325	0.391997835
Q3UIA2	-1.13631743	0.7458861	0.390431331
Q9ERU9	-1.136483579	0.745170605	0.391312974
B2RXS4	-1.136453723	0.74529945	0.391154273
Q9CQ56	-1.136435343	0.74537871	0.391056633
Q8BTV2	-1.135687783	0.748564518	0.387123265
Q6P9Q6	-1.135987437	0.747296274	0.388691163
O88892;P84102	-1.136207095	0.746359202	0.389847892
Q7TNC4;REV__P58774;REV__CON__Q3SX28;REV__Q8VDS7	-1.13609759	0.746827146	0.389270444
P54869	-1.1348733	0.751954793	0.382918507
P47713	-1.13500406	0.751415972	0.383588088
P51954	-1.134970335	0.751555139	0.383415195
Q62234	-1.134952304	0.751629487	0.383322817
P13412	-1.135346725	0.749994125	0.3853526
Q8VEE0	-1.135390131	0.749812989	0.385577141
Q9CYV5	-1.135396441	0.749786637	0.385609803
P60469	-1.135217682	0.750531257	0.384686425
Q9WV91	-1.135273646	0.750298563	0.384975084
Q80VA5	-1.135106166	0.750993793	0.384112372
Q9DB15	-1.135151789	0.750804747	0.384347042
O88551	-1.135163319	0.75075693	0.384406388
Q8BZR9	-1.135173994	0.750712645	0.384461349
A0A087WQ44	-1.134662516	0.752819078	0.381843438
P06537	-1.134708498	0.752630983	0.382077515
Q03963	-1.134468077	0.753611713	0.380856364
A0A0J9YTR2	-1.134578387	0.753162572	0.381415815
Q3UE31	-1.134587179	0.753126713	0.381460466
Q8CJ26	-1.134024845	0.755402278	0.378622568
O35071;Q80TF6	-1.134208819	0.754661777	0.379547042
Q8CGP1;Q6ZWY9;Q64478;P10853;Q8CGP2;Q64525;Q64475;P10854;P70696	-1.134299419	0.754295699	0.380003719
Q6KCD5	-1.13853672	0.736003487	0.402533234
P41216	-1.13890105	0.734308945	0.404592105
Q8BGT5	-1.138932937	0.734159588	0.404773349
Q8C1B1	-1.138808916	0.73473954	0.404069376
Q99KG3	-1.138772369	0.734909954	0.403862415
P06837	-1.139704817	0.730490815	0.409214002
A0A571BF58	-1.139573691	0.731121441	0.40845225
A2RSJ4	-1.139542947	0.731268856	0.408274091
Q8BRH0	-1.139178955	0.733001474	0.406177481
Q8C5W3	-1.139322308	0.732321869	0.407000439
Q9QZ47;O88346	-1.139434663	0.731786719	0.407647944
Q60575	-1.13715083	0.742259013	0.394891817
Q8BZ71	-1.137168096	0.74218284	0.394985256
Q64518	-1.137247092	0.741833791	0.395413301
Q14DH7	-1.137267113	0.741745183	0.39552193
Q8R429	-1.137273404	0.741717329	0.395556075
Q8C0E3	-1.13694095	0.743181543	0.393759407
Q9DBH5	-1.136749069	0.744019534	0.392729534
O09159	-1.136831535	0.743660012	0.393171523
Q9QZW0	-1.136838802	0.743628286	0.393210516
B1AZP2	-1.13819191	0.737587445	0.400604464
Q80W00	-1.138184989	0.737619043	0.400565946
Q3TN34	-1.138130451	0.737867796	0.400262655
Q8K268	-1.13815411	0.737759943	0.400394167
Q8BIJ7	-1.137517381	0.740632645	0.396884736
Q9CPT4	-1.137767933	0.739509576	0.398258357
O88685	-1.137665715	0.739968886	0.39769683
Q8BG95	-1.137662459	0.739983491	0.397678968
E9Q7G0	-1.120349091	0.802276663	0.318072428
Q3U9G9	-1.120470807	0.801914692	0.318556114
Q9DC63	-1.120435259	0.802020489	0.31841477
Q8HWB0	-1.120579998	0.801589296	0.318990702
Q9CW03	-1.12073822	0.801116658	0.319621562
P99027;A0A5F8MPY2	-1.119743048	0.804067409	0.315675639
Q3TJD7	-1.119792087	0.803923218	0.315868869
A0A1B0GT42	-1.119571214	0.804571682	0.314999532
Q80V42	-1.119451476	0.804922178	0.314529298
Q8R3T5	-1.119385605	0.805114684	0.314270921
Q3UTJ2	-1.123865519	0.791486069	0.33237945
Q8QZV7	-1.123815977	0.791643133	0.332172844
Q5SNZ0	-1.124055496	0.790882355	0.333173142
Q8VDC1	-1.124159223	0.79055178	0.333607443
Q922Q1	-1.125092445	0.787546761	0.337545684
Q920R0	-1.124611879	0.789101203	0.335510675
H3BJD6	-1.124825338	0.7884126	0.336412739
Q8CHS7	-1.124810904	0.788459258	0.336351645
Q9CYD3	-1.121164314	0.799837117	0.321327197
Q6R891	-1.121267569	0.799525558	0.32174201
Q99KP6	-1.121283846	0.79947639	0.321807456
Q64512	-1.121743008	0.798083366	0.323659642
Q8BSU7	-1.121434832	0.799019616	0.322415216
Q9D869	-1.121372001	0.79920985	0.32216215
Q9QXZ0	-1.121608106	0.798493855	0.323114251
D3YXK0	-1.121551141	0.798666889	0.322884252
P51912	-1.121494773	0.798837927	0.322656846
Q99MB7	-1.121519879	0.79876177	0.322758108
P48725	-1.122306069	0.796358935	0.325947134
P05977	-1.122725975	0.795061058	0.327664917
Q91YM4	-1.122587341	0.795490696	0.327096645
A2AAJ9	-1.122495207	0.795775603	0.326719604
P60060	-1.122476785	0.795832509	0.326644276
Q9D6Y7	-1.122882954	0.794573206	0.328309748
Q9D8S3	-1.123000662	0.794206442	0.32879422
P19137	-1.123211146	0.793548542	0.329662604
Q9D8L5	-1.123433913	0.792849347	0.330584566
Q9WVH9	-1.123445358	0.792813343	0.330632015
Q9Z129	-1.123446269	0.792810478	0.330635791
Q8BV57	-1.133544484	0.757317976	0.376226508
P47941	-1.133493642	0.757519259	0.375974383
Q9QXM1	-1.133507797	0.757463245	0.376044552
Q99LI5	-1.13258703	0.761062519	0.37152451
P10833	-1.132448071	0.761598099	0.370849972
Q9JKS4	-1.132491404	0.761431292	0.371060113
O70622	-1.13305765	0.759233966	0.373823684
P63034	-1.132860084	0.760004374	0.37285571
Q8K2Y3	-1.130882765	0.7675011	0.363381664
P31266	-1.130698641	0.768180378	0.362518263
Q91Z83	-1.130630806	0.768429868	0.362200938
Q64462	-1.130176404	0.770090574	0.36008583
A0A338P6I9	-1.130113297	0.770319778	0.359793519
Q99J99	-1.130070755	0.770474093	0.359596662
P20801	-1.130087621	0.770412933	0.359674689
Q8CDN6	-1.130086358	0.770417514	0.359668844
Q8BNI4	-1.130499009	0.768913426	0.361585583
Q8BVA4	-1.13033275	0.769521226	0.360811524
O88507	-1.132220764	0.762470018	0.369750745
P60229	-1.131925783	0.763593904	0.368331879
P19536	-1.132000927	0.763308409	0.368692518
O35648	-1.132059849	0.763084165	0.368975685
Q60673	-1.132059425	0.763085779	0.368973647
P99028	-1.131589395	0.764865239	0.366724156
Q62415	-1.131301589	0.765944418	0.365357172
Q8C7B8	-1.131149752	0.766510634	0.364639118
Q80XI6	-1.131166874	0.766446892	0.364719982
Q923G2	-1.131163105	0.766460924	0.364702181
Q9Z2I0	-1.129405861	0.77286585	0.35654001
P58771	-1.129581541	0.772237528	0.357344013
Q8R0J4	-1.129542697	0.772376677	0.35716602
E9PVZ8	-1.129697258	0.771822248	0.35787501
Q9R0N7	-1.129629717	0.772064773	0.357564944
Q8R313	-1.129041234	0.774161784	0.35487945
P10605	-1.128391278	0.776445123	0.351946154
Q80X82	-1.128628799	0.775614601	0.353014199
Q3U898	-1.127454783	0.779677118	0.347777665
E9PZQ0;A2AGL3	-1.127620444	0.779110246	0.348510198
Q9DBR7	-1.127593685	0.779201952	0.348391733
Q5EG47	-1.127211656	0.780505371	0.346706285
Q9CR13	-1.127258732	0.780345338	0.346913394
Q5DTM8	-1.127136813	0.780759459	0.346377354
Q9QYS9	-1.127056539	0.781031529	0.346025011
Q9DCC8	-1.126147437	0.784080423	0.342067014
Q00897	-1.125523546	0.786139393	0.339384153
P28738	-1.125730489	0.785459382	0.340271107
Q8R4U7	-1.125684702	0.785610086	0.340074615
Q9EST5	-1.150295025	0.662417302	0.487877724
P42125	-1.150228409	0.663040057	0.487188351
Q6NSU3	-1.150261555	0.662730816	0.487530739
Q6TYB5	-1.150078869	0.664420338	0.485658532
O35639	-1.150183645	0.663455771	0.486727874
O88990	-1.150167324	0.663606792	0.486560533
Q62230	-1.150787591	0.657649129	0.493138462
Q99LU0;Q9CQD4	-1.150645531	0.659055352	0.491590179
Q9R0Z9	-1.150602253	0.659478567	0.491123686
P79568;P14430;P14429;P14431	-1.150587082	0.659626365	0.490960717
Q3UFK8	-1.150587622	0.659621112	0.490966509
Q8BH75	-1.151126575	0.654180757	0.496945818
Q8R555	-1.151061665	0.654857888	0.496203777
P97950	-1.150920844	0.656305386	0.494615458
Q6QD59	-1.150905218	0.656464237	0.494440981
Q60823	-1.150988423	0.655614357	0.495374066
Q8CHY6	-1.150988235	0.655616291	0.495371944
E9Q1M1	-1.151017672	0.655313211	0.495704461
Q8R2T8	-1.151027354	0.655213254	0.495814101
O89032	-1.15311707	0.628910865	0.524206205
Q91YM2	-1.153017479	0.630481139	0.52253634
Q91VW5	-1.152958832	0.631383413	0.521575419
A2A863	-1.15297812	0.631088433	0.521889687
P50136	-1.152969927	0.63121394	0.521755987
P28828	-1.152909898	0.632124296	0.520785602
Q6PIX5	-1.152912613	0.632083465	0.520829147
A2ASS6	-1.152851583	0.632993632	0.519857952
P43275	-1.152877904	0.632603033	0.520274871
O08579	-1.1527738	0.634131377	0.518642422
P70288	-1.152691415	0.635310752	0.517380663
Q9DCW4	-1.152673298	0.635566714	0.517106585
P14576	-1.152487726	0.638123029	0.514364697
Q80VC9	-1.152398884	0.639307363	0.513091521
Q8CCF0	-1.152404701	0.639230545	0.513174156
Q8BH07	-1.152220275	0.641618375	0.5106019
O08532	-1.152248218	0.641262678	0.51098554
Q8BX80	-1.15224601	0.641290864	0.510955146
Q6PER3	-1.15231413	0.64041521	0.51189892
O08917	-1.152342648	0.640044762	0.512297886
Q8R0N6	-1.152340989	0.640066376	0.512274613
A2ATK9	-1.152031905	0.643963481	0.508068424
P97333	-1.151938288	0.645096824	0.506841464
Q8R2R6	-1.151979568	0.644599589	0.507379979
Q8BWG4	-1.151819187	0.646510018	0.505309169
Q9CYA6	-1.151802561	0.646704846	0.505097716
Q6GQT1	-1.151726395	0.64758999	0.504136406
Q921G6	-1.15174022	0.647430215	0.504310006
Q9R0Q9	-1.151745878	0.64736472	0.504381157
Q3U564	-1.151705494	0.647830809	0.503874685
Q61624	-1.151679509	0.648128972	0.503550538
Q6PDH0	-1.15355595	0.62129205	0.5322639
P39447	-1.153535737	0.621673071	0.531862666
Q8K2B0	-1.153533811	0.621709211	0.531824599
P52196	-1.153495907	0.622414064	0.531081844
Q91W61	-1.153479076	0.622723404	0.530755672
Q9Z2P8	-1.153463877	0.62300086	0.530463017
P54775	-1.153650491	0.61946219	0.5341883
P70426	-1.153680812	0.618857512	0.5348233
Q91X51	-1.153698492	0.618500677	0.535197815
P70193	-1.153846525	0.615376447	0.538470078
Q2KN98	-1.153824273	0.615862871	0.537961403
Q924D0	-1.153790883	0.616581064	0.537209819
Q9Z1S5	-1.153754572	0.617346916	0.536407656
P58802	-1.153771568	0.616990345	0.536781224
Q8BFP9	-1.153763957	0.61715043	0.536613528
A2BH40	-1.1540124	0.611524824	0.542487576
Q9WTQ5	-1.153916923	0.613793238	0.540123685
P49312	-1.153958237	0.612830073	0.541128163
Q99K28	-1.15396592	0.61264796	0.54131796
Q5U4D9	-1.154181488	0.607071051	0.547110437
Q8K4X7	-1.154177743	0.607177117	0.547000626
Q8K3W3	-1.154236465	0.605466723	0.548769742
Q8K400	-1.154207576	0.606321132	0.547886444
P46938	-1.154301466	0.603439419	0.550862046
Q8BTY2	-1.154309783	0.603168221	0.551141562
G5E8Q8	-1.154255547	0.604887447	0.5493681
P97822	-1.154271672	0.604387984	0.549883688
P55012	-1.154366866	0.601222035	0.55314483
Q9WU28	-1.15435261	0.601722977	0.552629632
Q91X43	-1.154399509	0.600032408	0.554367101
Q60605	-1.15441002	0.599635569	0.554774451
Q8CHG3	-1.154412636	0.599535668	0.554876967
Q3TLH4	-1.154437264	0.598571663	0.555865602
E9Q557	-1.154428421	0.598922847	0.555505575
Q8C6U2	-1.15442083	0.59921973	0.555201101
Q8VC31	-1.154544835	0.593694014	0.560850821
Q99JV5	-1.154518778	0.595001788	0.55951699
Q8C838	-1.15453188	0.594356978	0.560174902
Q8VCT4;E9PYP1	-1.154530901	0.594406031	0.560124869
Q2NL51	-1.154475578	0.596976184	0.557499394
P98156	-1.154499126	0.595926461	0.558572664
Q7TNV0	-1.15450889	0.595473035	0.559035855
P52430	-1.154644763	0.587151129	0.567493634
Q3UQN2	-1.154644899	0.587139151	0.567505749
Q8K1J5	-1.154648091	0.586855007	0.567793084
Q921M4	-1.154647523	0.586906173	0.567741351
Q3U1Y4	-1.154631097	0.588282432	0.566348665
Q91X20	-1.15463238	0.5881813	0.56645108
Q62093;Q9DAE2	-1.15464121	0.587457489	0.567183722
Q8BXK9	-1.154636454	0.58785363	0.566782823
Q924T7	-1.154638474	0.587687241	0.566951233
P59438	-1.154687322	0.582128074	0.572559248
Q8CGU1	-1.154683452	0.58278173	0.571901723
Q9CZA6	-1.154681476	0.583086691	0.571594785
B2RXQ2;B8QI36	-1.15466397	0.585290477	0.569373493
Q62073	-1.154677016	0.583721413	0.570955603
Q3UJU9	-1.154670222	0.584581438	0.570088783
Q9D4H2	-1.154672531	0.584301181	0.57037135
A2AKG8	-1.154688916	0.572857765	0.581831151
Q8BTW9;Q8C015	-1.154691544	0.573398685	0.581292859
O70176	-1.154696964	0.574860235	0.579836729
Q99N57	-1.154697233	0.574955757	0.579741476
P16015	-1.154699677	0.57612865	0.578571027
Q9WVJ3	-1.154699439	0.57596996	0.57872948
P97449	-1.154700538	0.577350269	0.577350269
Q04736	-1.154700127	0.5781943	0.576505827
Q6KAU4	-1.154700255	0.578050369	0.576649886
Q505D7	-1.154692893	0.580985356	0.573707538
Q64322	-1.154693919	0.580732848	0.573961071
Q68FH4	-1.154698074	0.579415053	0.575283021
P53395	-1.154695409	0.580328328	0.574367081
P49817;P51637	-1.154696227	0.580080733	0.574615494
Q8C1E7	-1.15469652	0.579986347	0.574710174
Q9D1K7	-1.147065338	0.458724859	0.688340478
Q8BMQ8	-1.146974619	0.458001734	0.688972884
Q8K0P3	-1.146943859	0.457757462	0.689186397
Q9D0F3	-1.146598497	0.455045643	0.691552854
Q9WUU7	-1.146434168	0.453774531	0.692659638
Q8R1K1	-1.147645995	0.463453149	0.684192846
Q9DAY6	-1.147500616	0.462252537	0.685248079
Q8CGY6	-1.147358775	0.461092169	0.686266605
Q9D099	-1.147416164	0.461560369	0.685855795
Q9CR47	-1.148334852	0.469308945	0.679025907
P59708	-1.148197849	0.468121218	0.680076631
Q8BK67	-1.148216761	0.468284456	0.679932305
Q6VNB8	-1.147982308	0.466276411	0.681705896
Q91ZP3;Q99PI5	-1.147960811	0.466093974	0.681866837
E9PVA8	-1.147899987	0.465579266	0.682320721
Q60952	-1.147840405	0.46507718	0.682763225
Q8BML9	-1.147826157	0.464957424	0.682868733
Q3TUA9	-1.14872327	0.472744033	0.675979237
P52633	-1.149312791	0.478167633	0.671145158
Q6ZQ73	-1.149421376	0.479196941	0.670224435
Q3U0J8	-1.149363033	0.478642651	0.670720382
Q70FJ1	-1.149373056	0.478737667	0.670635389
Q80Y14	-1.149016787	0.475410882	0.673605906
Q8BST6	-1.149063283	0.475839302	0.673223982
Q5XPI3	-1.149192316	0.477037124	0.672155192
P33175	-1.149160586	0.476741341	0.672419245
Q99JG7	-1.149136665	0.476518884	0.67261778
A0A5F8MPP0	-1.150543661	0.490495875	0.660047786
Q60722;Q61286	-1.150587538	0.490965611	0.659621927
P62245	-1.149588508	0.48080119	0.668787319
Q31099;P35737	-1.149713967	0.482021936	0.66769203
Q8BSY0	-1.1496812	0.481701704	0.667979496
P70295	-1.15005865	0.485453511	0.664605139
Q9D187	-1.150097013	0.485842869	0.664254144
P63038	-1.149977579	0.48463573	0.665341849
Q45VK7	-1.149906071	0.483919961	0.66598611
Q8R2Q4	-1.154618348	0.56537802	0.589240328
Q69ZH9	-1.154630471	0.566299	0.58833147
Q9Z1E4;Q8VCB3	-1.154629214	0.566200072	0.588429142
Q61789	-1.15466122	0.569078278	0.585582942
Q8CC88	-1.154658632	0.568809727	0.585848905
P32848	-1.154646017	0.567605394	0.587040622
P62737;P68033;P63268	-1.15464507	0.567520893	0.587124177
Q91W39	-1.154650558	0.568021115	0.586629442
Q99KY4	-1.154654765	0.5684234	0.586231364
Q6PFQ7	-1.154569737	0.562233592	0.592336146
Q8BRT1	-1.154603394	0.56433051	0.590272884
Q9QYI5	-1.154597726	0.563954632	0.590643094
O09164	-1.154524474	0.559800028	0.594724446
Q9Z0R6	-1.15452252	0.559702437	0.594820084
E9Q236	-1.154536324	0.560403798	0.594132527
Q5SW19	-1.154538392	0.560511342	0.594027051
P15864;Q07133	-1.154489918	0.558145955	0.596343963
Q6Y5D8	-1.154488925	0.558100488	0.596388436
P25799	-1.154500313	0.558628384	0.595871929
Q6NVF4	-1.154509648	0.559072295	0.595437353
Q7TMK9	-1.154510308	0.559104091	0.595406217
Q8C570	-1.153850884	0.538570487	0.615280398
A0A0G2JDV3;Q000W5;A9YVJ5;Q2V6D6	-1.153972637	0.541484704	0.612487933
Q80WQ6	-1.153910219	0.539963155	0.613947064
Q99MU3	-1.153947092	0.54085456	0.613092532
Q52KI8	-1.153933614	0.540526295	0.613407319
Q9Z1P6	-1.153938831	0.540653011	0.61328582
Q99M31	-1.15413231	0.545698044	0.608434266
Q8BGQ7	-1.154022768	0.542753711	0.611269057
Q8BGA9	-1.15403255	0.543006647	0.611025903
Q9CQN1	-1.154029592	0.54292997	0.611099622
Q8C2A2	-1.154309268	0.551124167	0.603185102
Q91XD6	-1.154286946	0.550380927	0.603906019
O08784	-1.15429699	0.550712824	0.603584166
Q6PAM1	-1.154298521	0.550763791	0.60353473
Q91W90	-1.154248101	0.549133133	0.605114968
P04117;O08716	-1.154226636	0.548466257	0.605760379
Q9DBV4	-1.154206733	0.547861039	0.606345693
Q9D8M4	-1.154348201	0.552472407	0.601875794
Q64433;Q9JI95	-1.154385744	0.553844095	0.600541649
Q9CW42	-1.154402307	0.554474833	0.599927474
O70194	-1.154454787	0.556597123	0.597857665
Q8VBX6	-1.154453572	0.556545575	0.597907997
P33622	-1.154460863	0.556856744	0.597604119
Q61235	-1.154464899	0.557031025	0.597433874
O54941	-1.154439118	0.55594181	0.598497308
Q61703	-1.15441527	0.554980669	0.599434601
E9Q6J5;Q5SQY2	-1.154421934	0.555245105	0.599176828
P33215	-1.154425559	0.55539026	0.599035299
Q8K2C7	-1.151545115	0.501895052	0.649650064
E9PXC0	-1.151539714	0.501829237	0.649710477
Q8BL66;Q8CHD8	-1.151541086	0.501845947	0.649695139
Q3ULF4	-1.151152984	0.497249574	0.65390341
Q61592	-1.151209313	0.497901129	0.653308184
Q61161	-1.151353314	0.499590135	0.65176318
Q61578	-1.151273349	0.498647992	0.652625357
A2AF28	-1.152167934	0.509888879	0.642279054
P97434	-1.152007969	0.507752765	0.644255204
Q3UIL6	-1.152080903	0.508718878	0.643362026
Q8BMA6	-1.152061446	0.508459879	0.643601567
P30681	-1.151933458	0.506778715	0.645154743
Q9EQT3	-1.151862192	0.505858859	0.646003333
Q3TSG4	-1.151812384	0.505222575	0.646589809
Q9JLC8	-1.15178197	0.504836635	0.646945334
E9Q4X2	-1.151750658	0.504441331	0.647309327
E9PYF4	-1.151716508	0.504012487	0.647704021
Q64092	-1.151715373	0.503998274	0.647717099
Q7M729	-1.152978387	0.521894046	0.631084341
E9Q3E1	-1.152884898	0.520386142	0.632498756
O54692	-1.152919459	0.520939103	0.631980357
Q99K74	-1.152638644	0.516585607	0.636053037
P70170	-1.15268387	0.517266374	0.635417496
Q3TDD9	-1.152685069	0.517284524	0.635400545
Q8VDY9	-1.152379859	0.512821986	0.639557873
A2BDX3	-1.152323367	0.512027894	0.640295473
P70699	-1.15234994	0.512400281	0.639949659
Q61576	-1.152352381	0.512434584	0.639917797
Q8VDJ3	-1.152435303	0.513610514	0.638824789
Q921C5	-1.152444538	0.513742752	0.638701786
P47867	-1.152530819	0.514991157	0.637539662
Q91YR7	-1.152546734	0.515224049	0.637322685
Q8BXV2	-1.1537241	0.535746046	0.617978054
P57759	-1.153725997	0.535786935	0.617939062
Q6NZA9;Q8VI33	-1.15372543	0.5357747	0.617950729
Q03173	-1.15373413	0.535962689	0.617771441
Q64FW2	-1.153729735	0.535867632	0.617862104
O70311	-1.153675275	0.534706658	0.618968617
Q6NZN0	-1.153653348	0.534247751	0.619405597
Q61165	-1.153433156	0.52987679	0.623556366
Q6A068;A0A1W2P7S8;A0A1W2P855;A0A1W2P7Z8;A0A1W2P7H4;A0A1W2P6Q8	-1.153488212	0.530932448	0.622555764
Q61823	-1.153214948	0.52589788	0.627317068
O35316	-1.153306051	0.527521931	0.62578412
Q9CXR1;A0A140LIS8	-1.153361939	0.528543896	0.624818043
